# Supplementary material for: Interpreting, analysing and modelling COVID-19 mortality data
Source: PubMed Central journal article supplement (PMC7527427; doi:10.1007/s11071-020-05966-z), 2020-10-01

# Albania

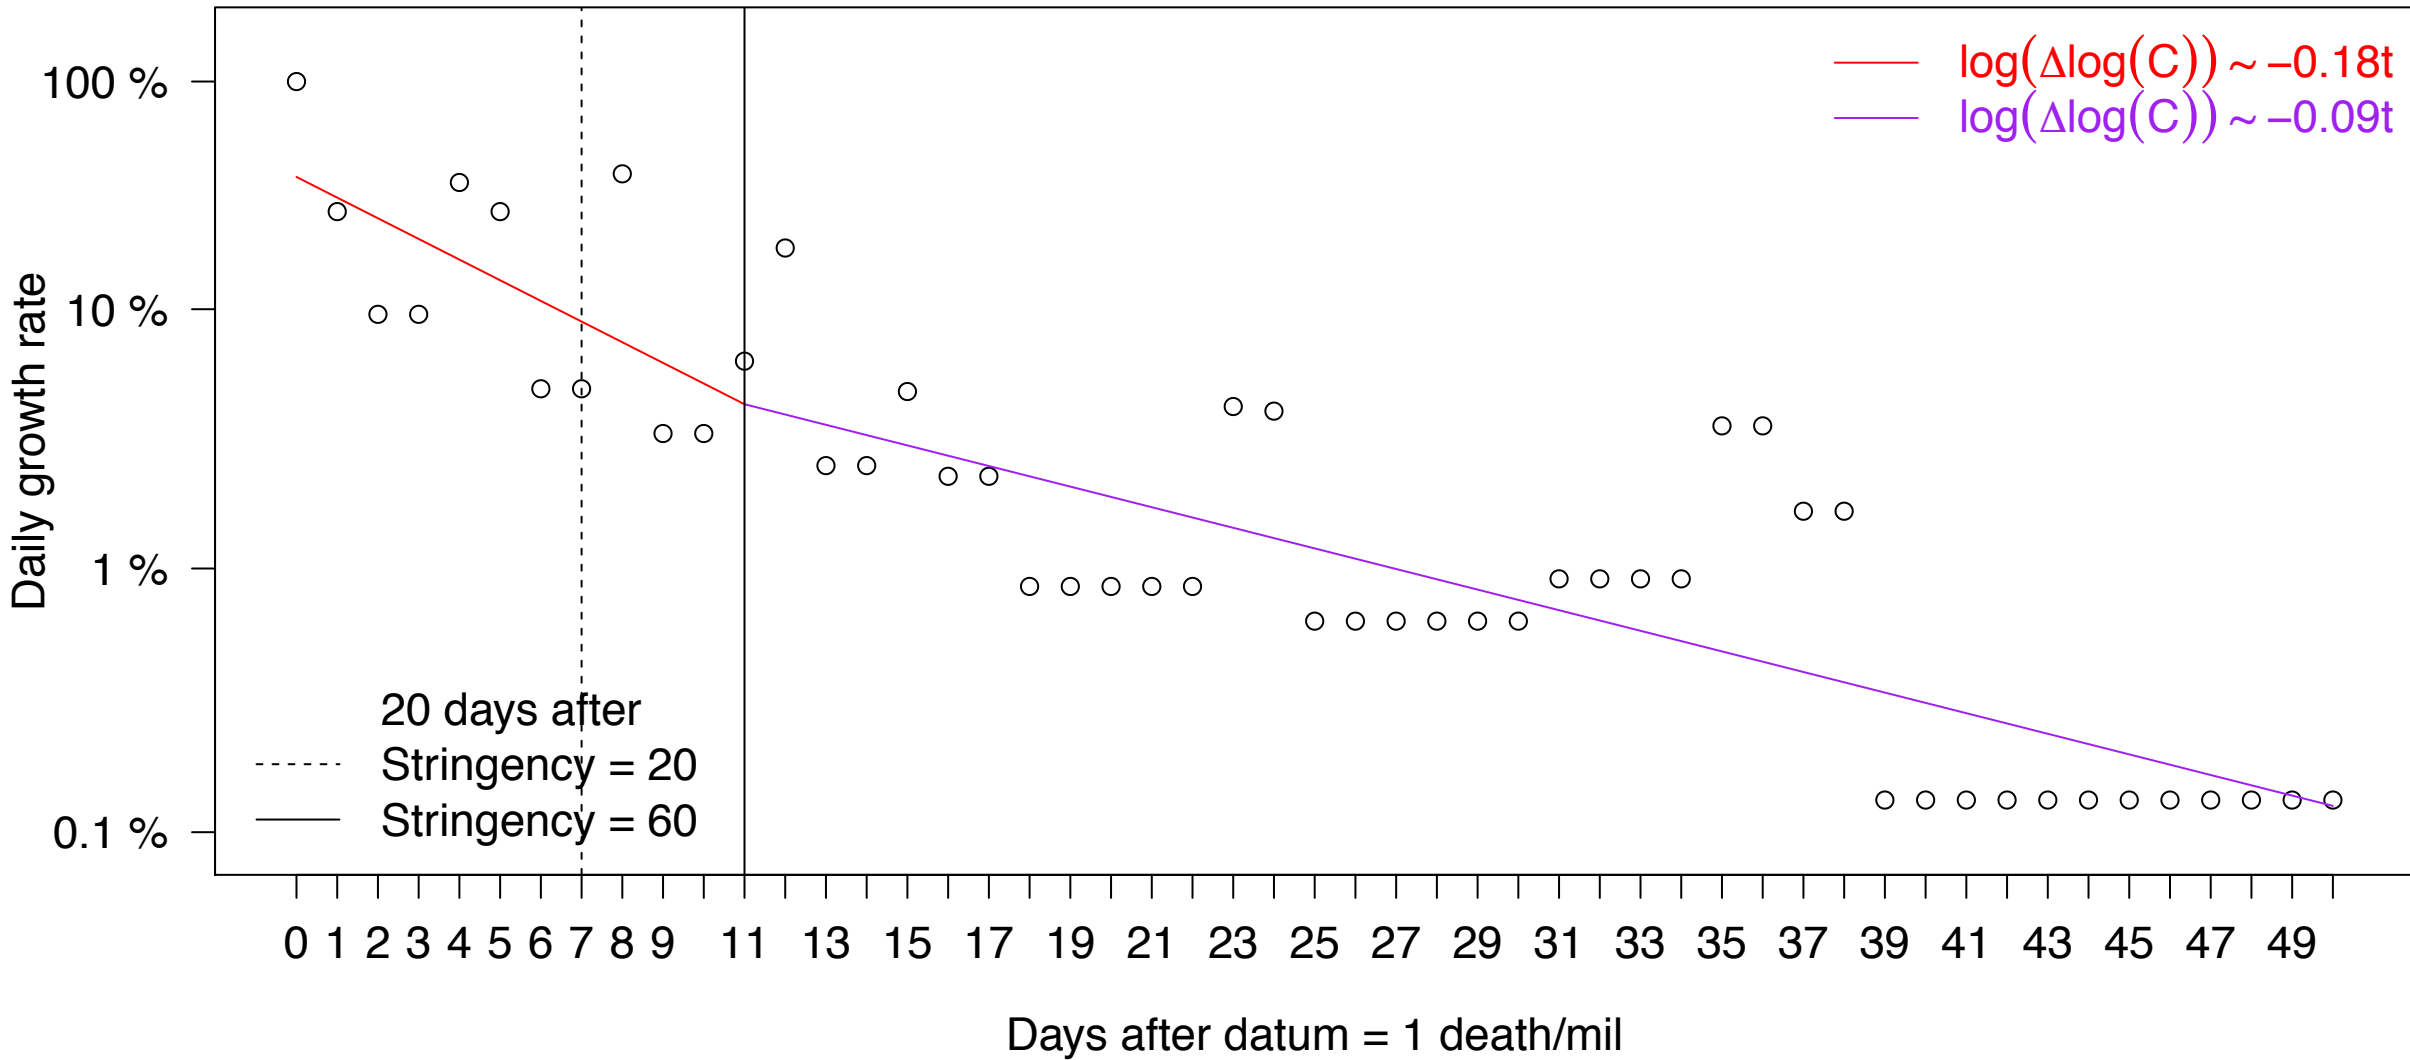

# Austria

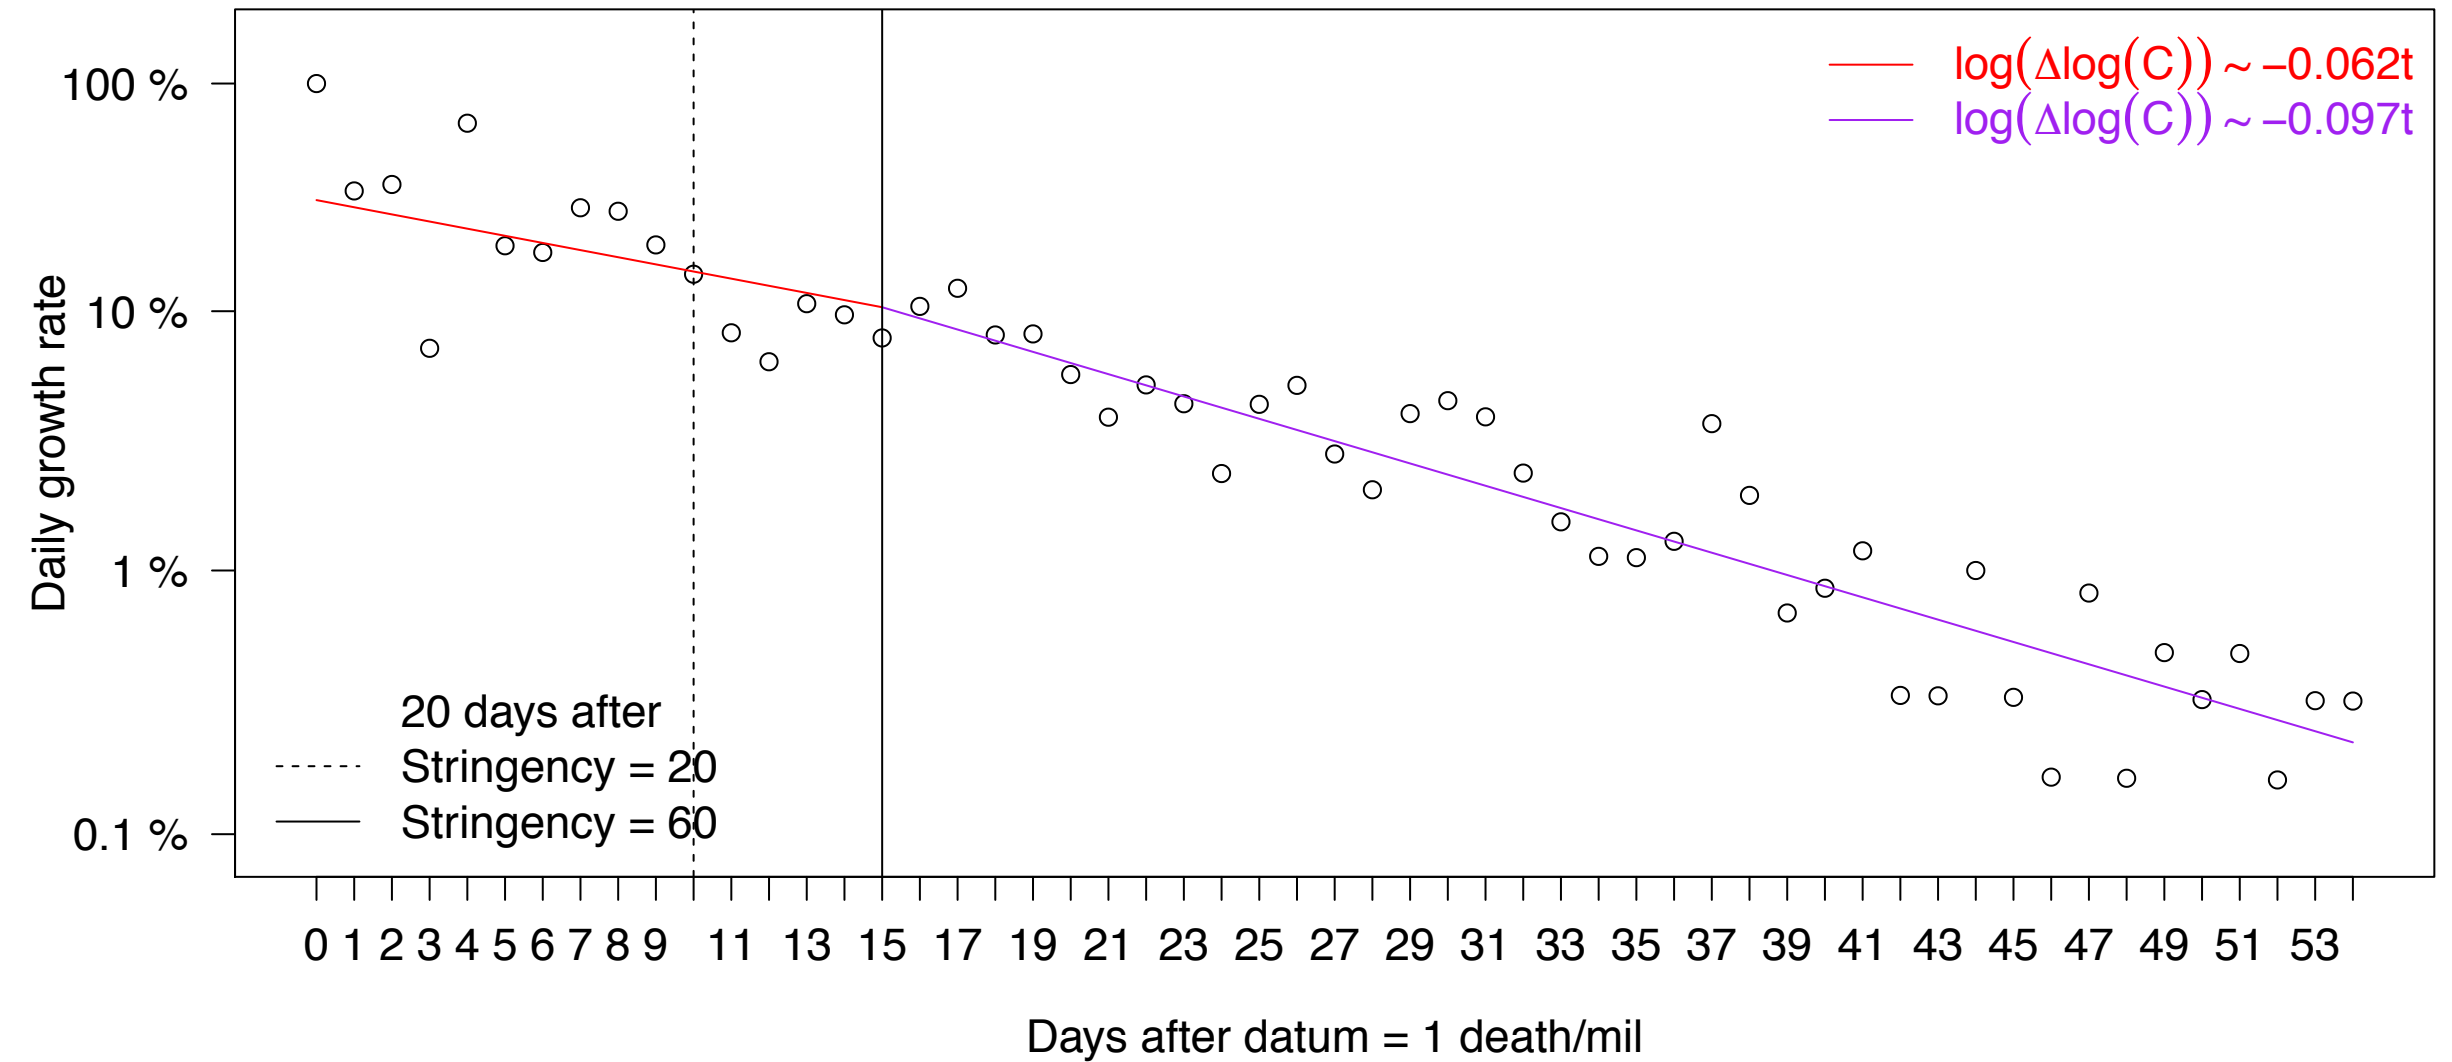

# Belgium

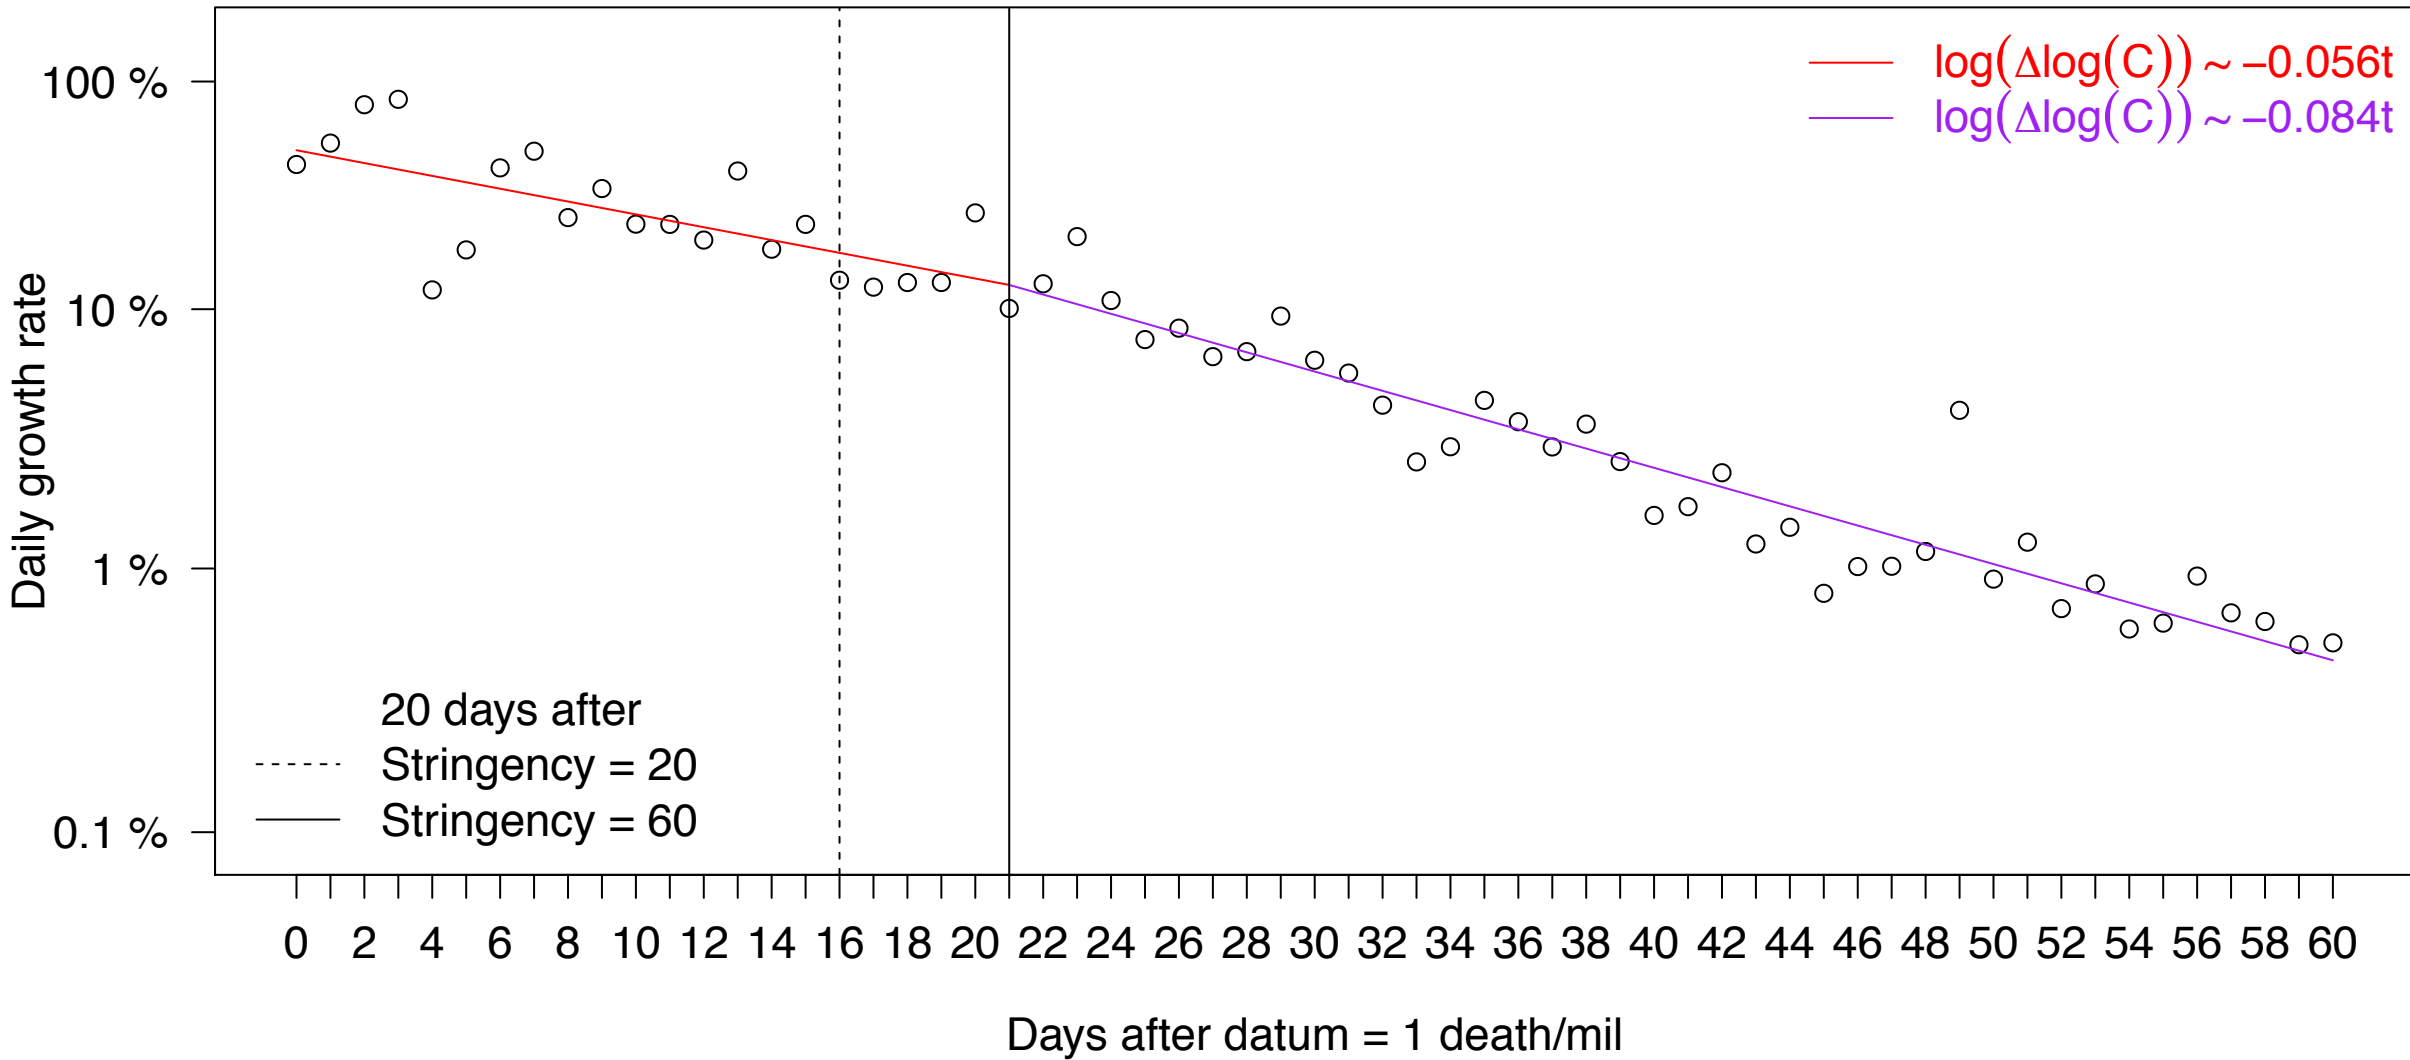

# Bosnia & Herzegovina

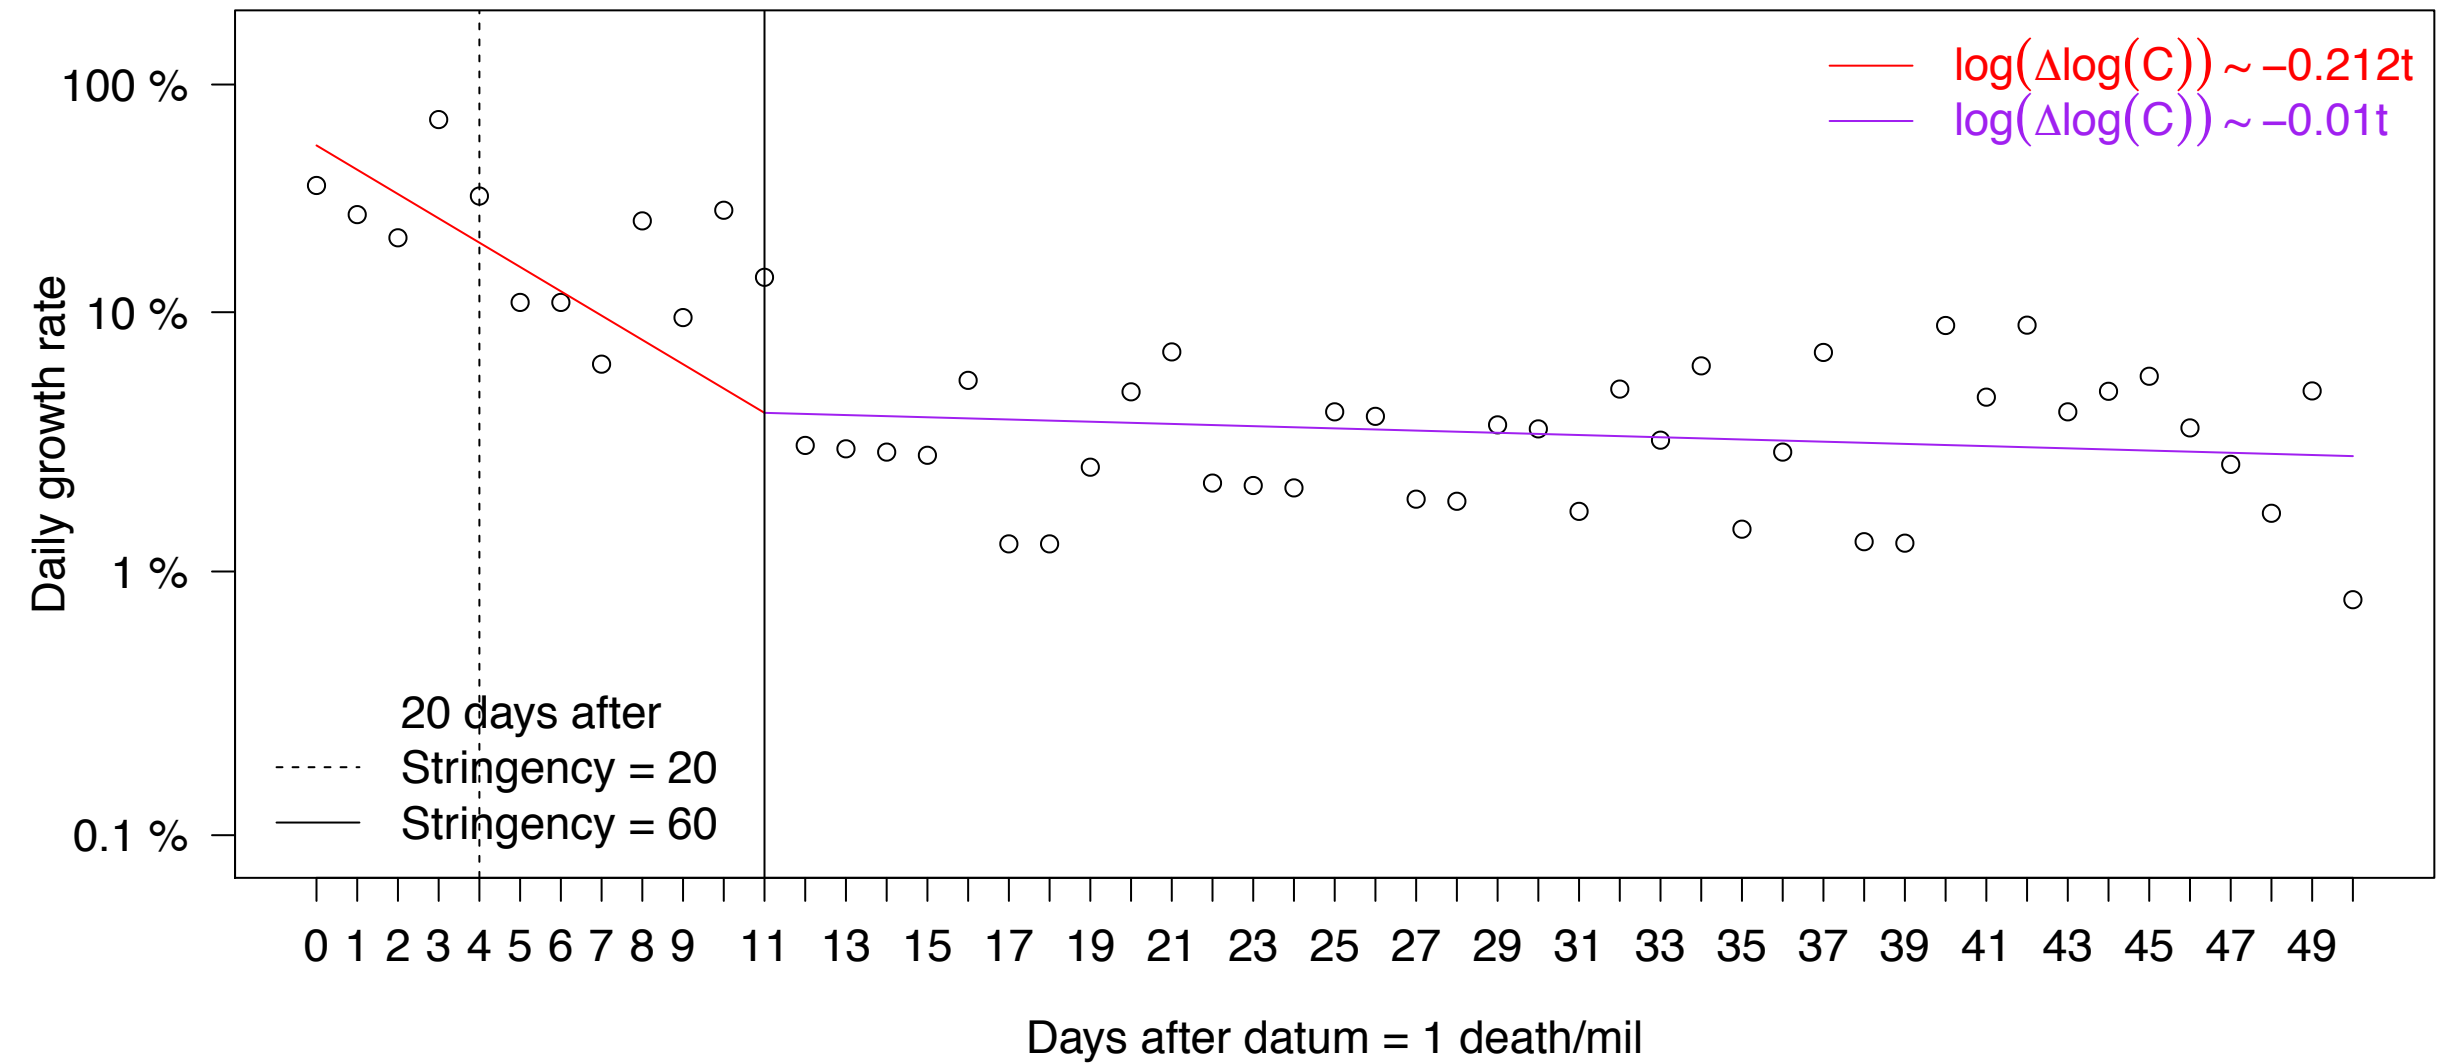

# Bulgaria

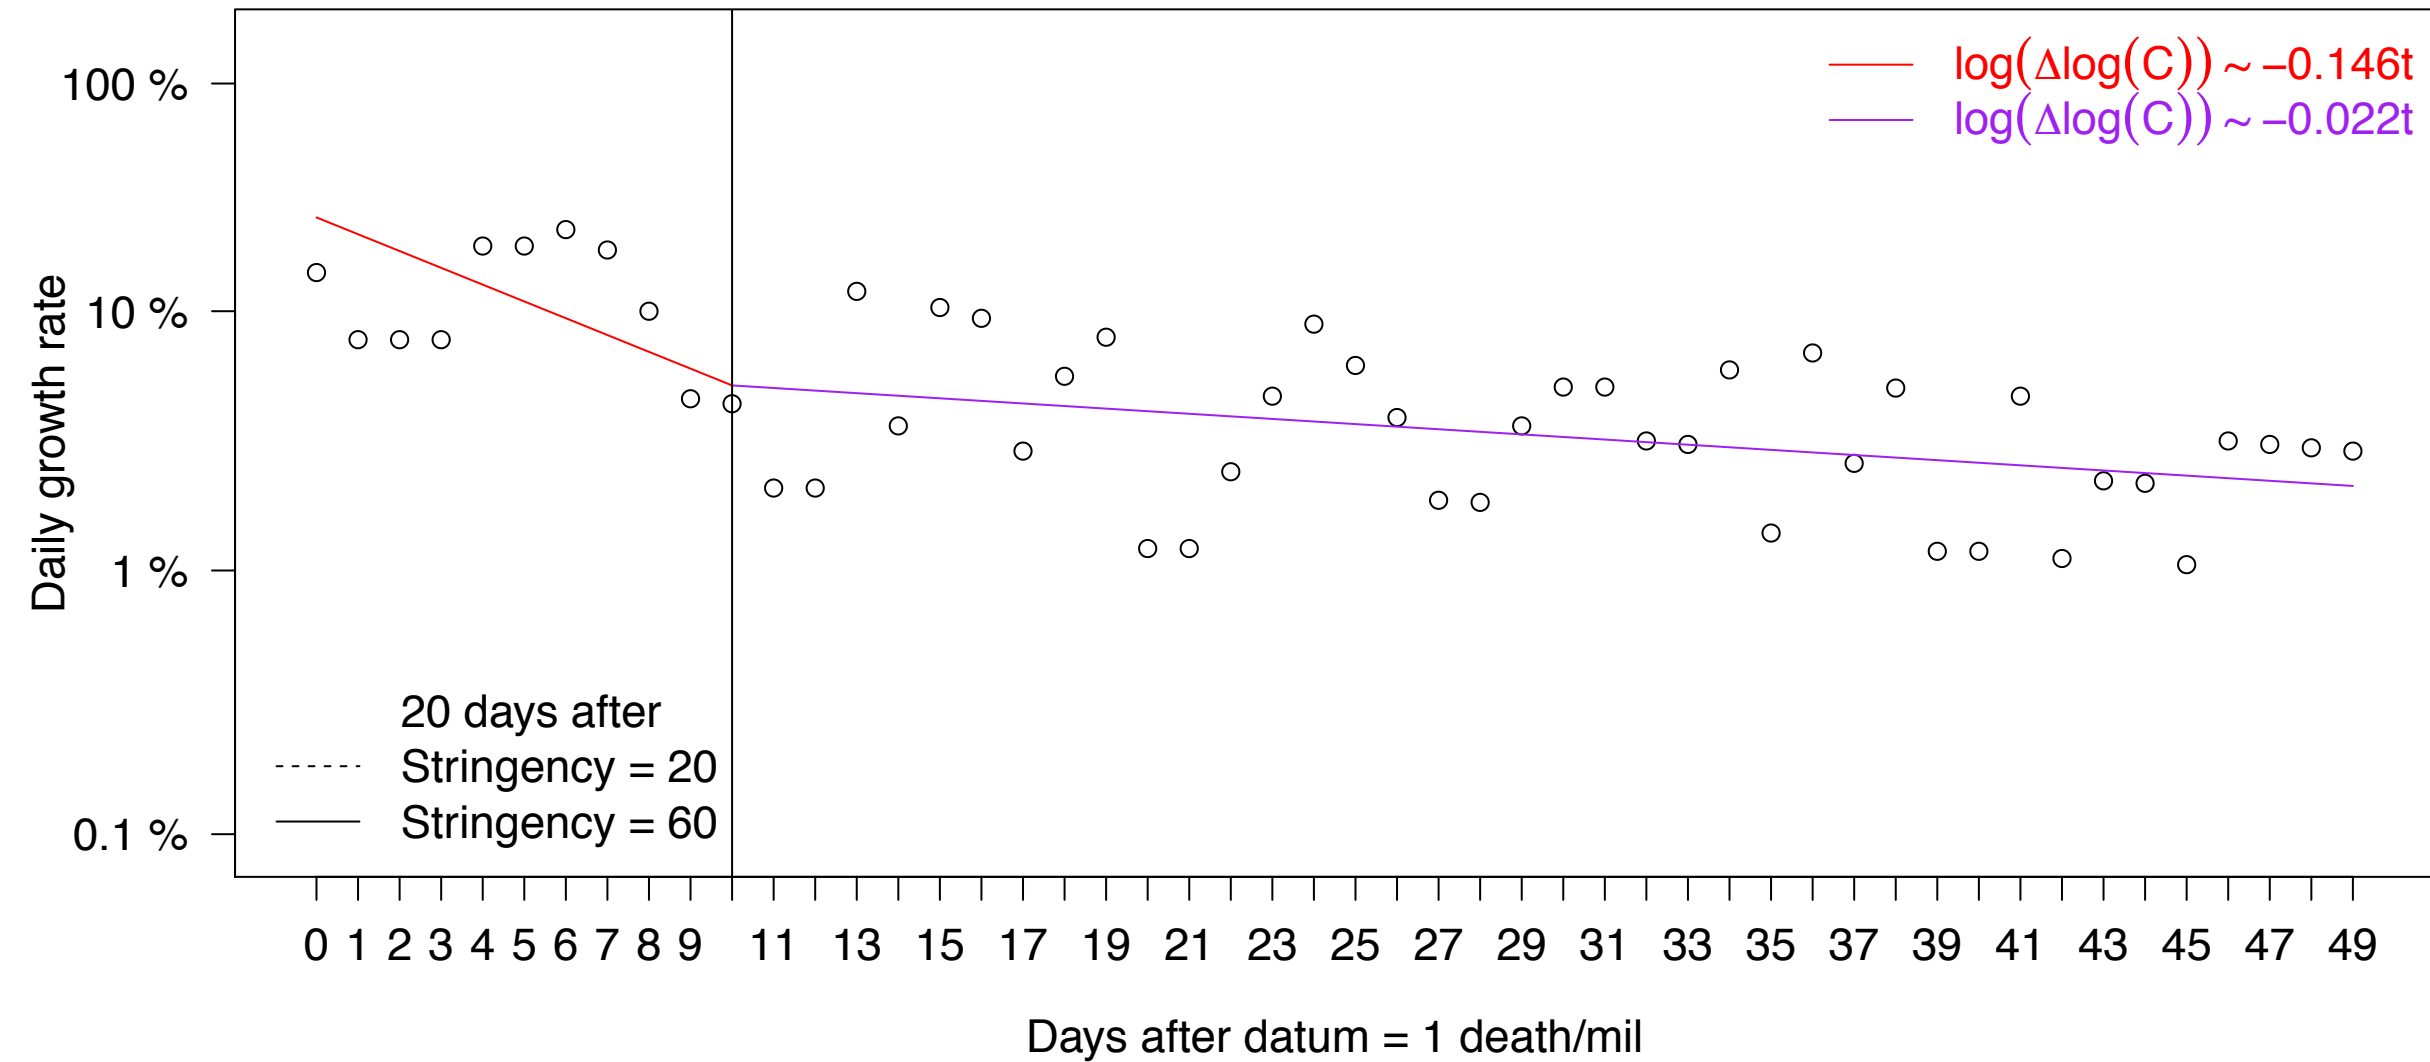

# Canada

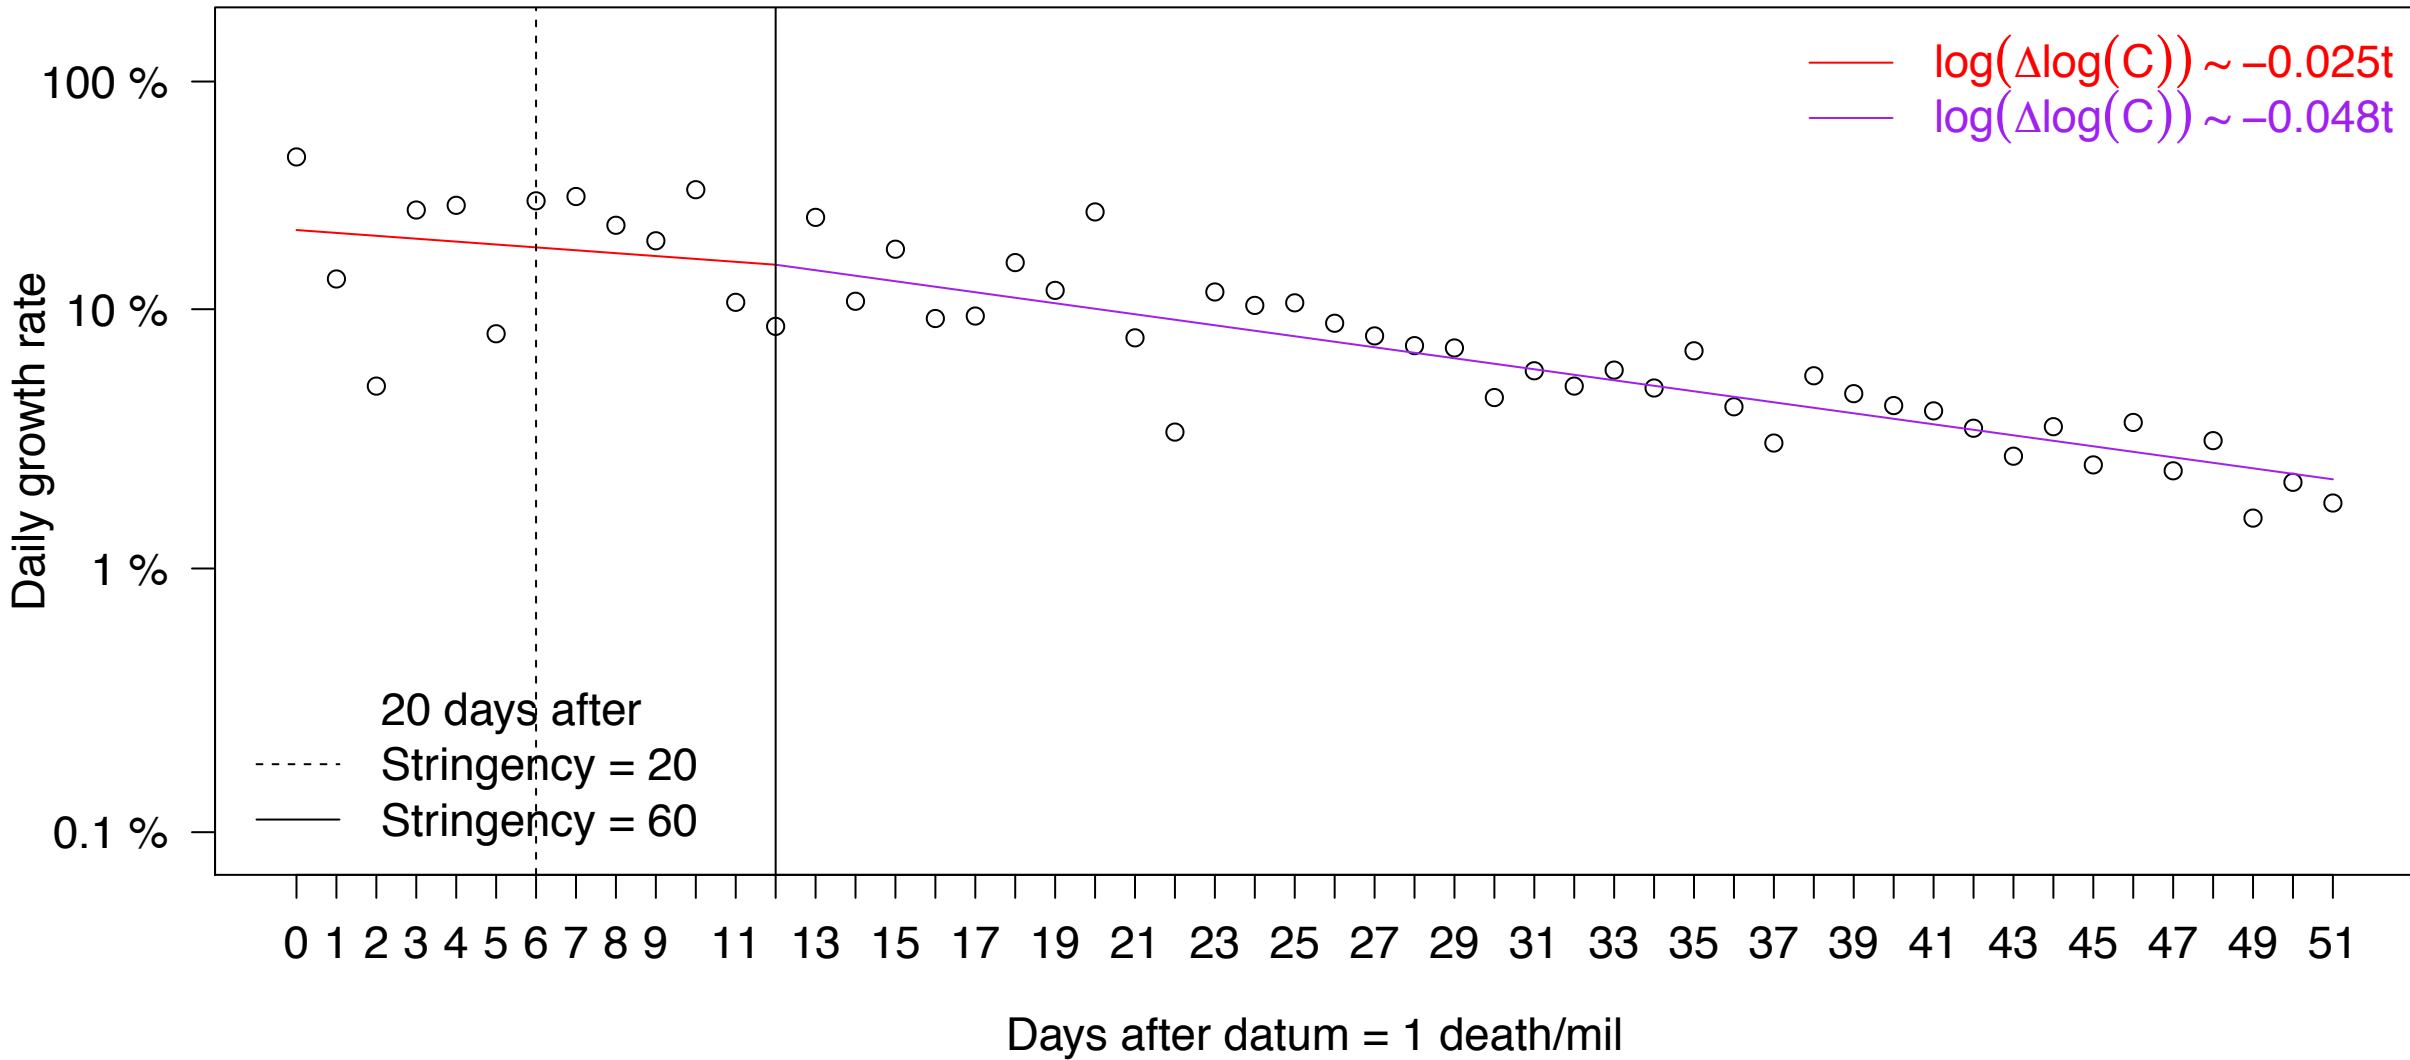

# Croatia

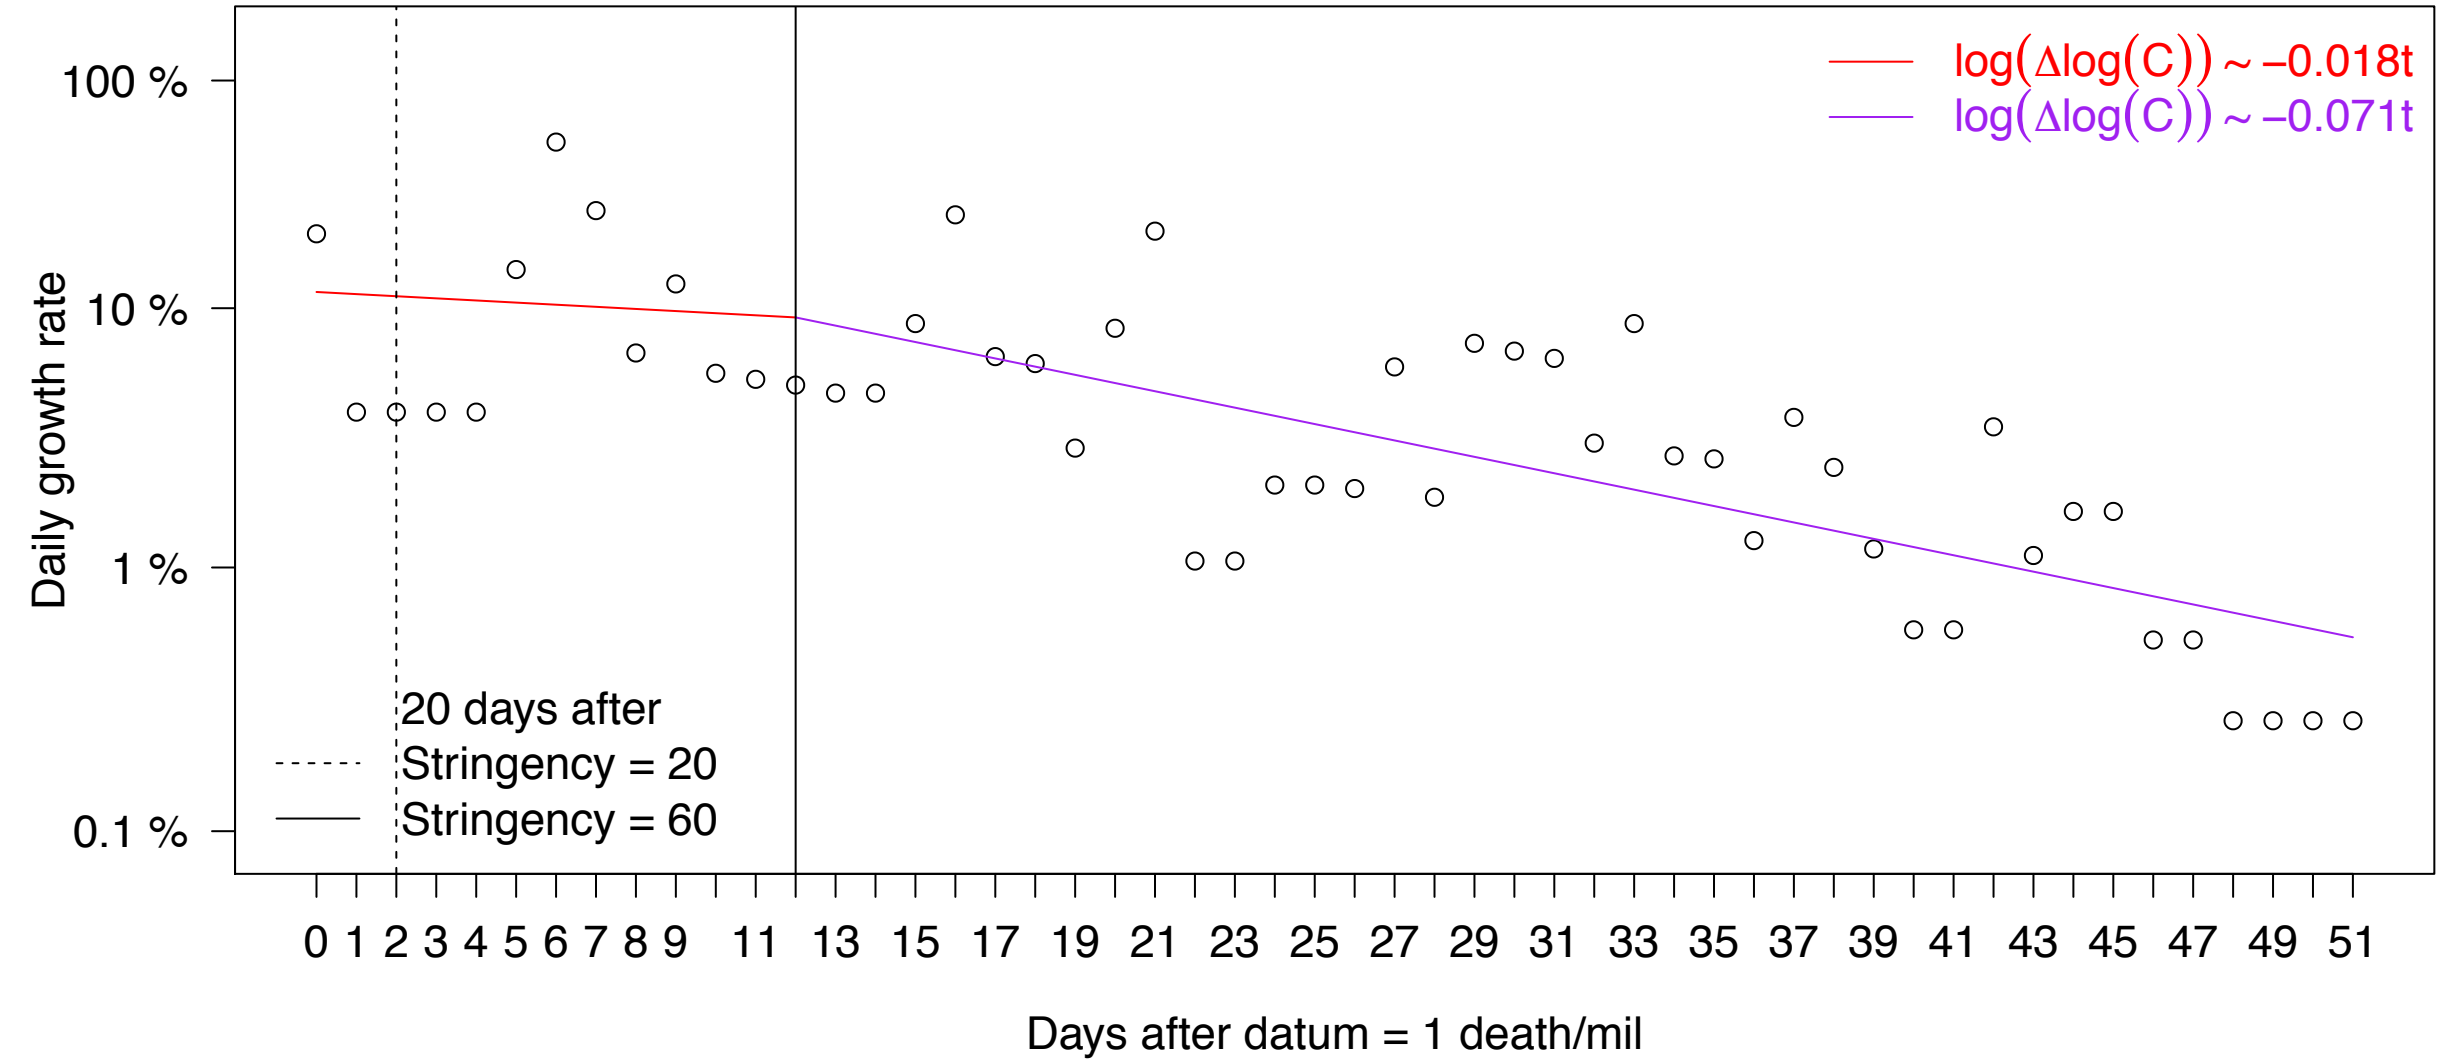

# Czechia

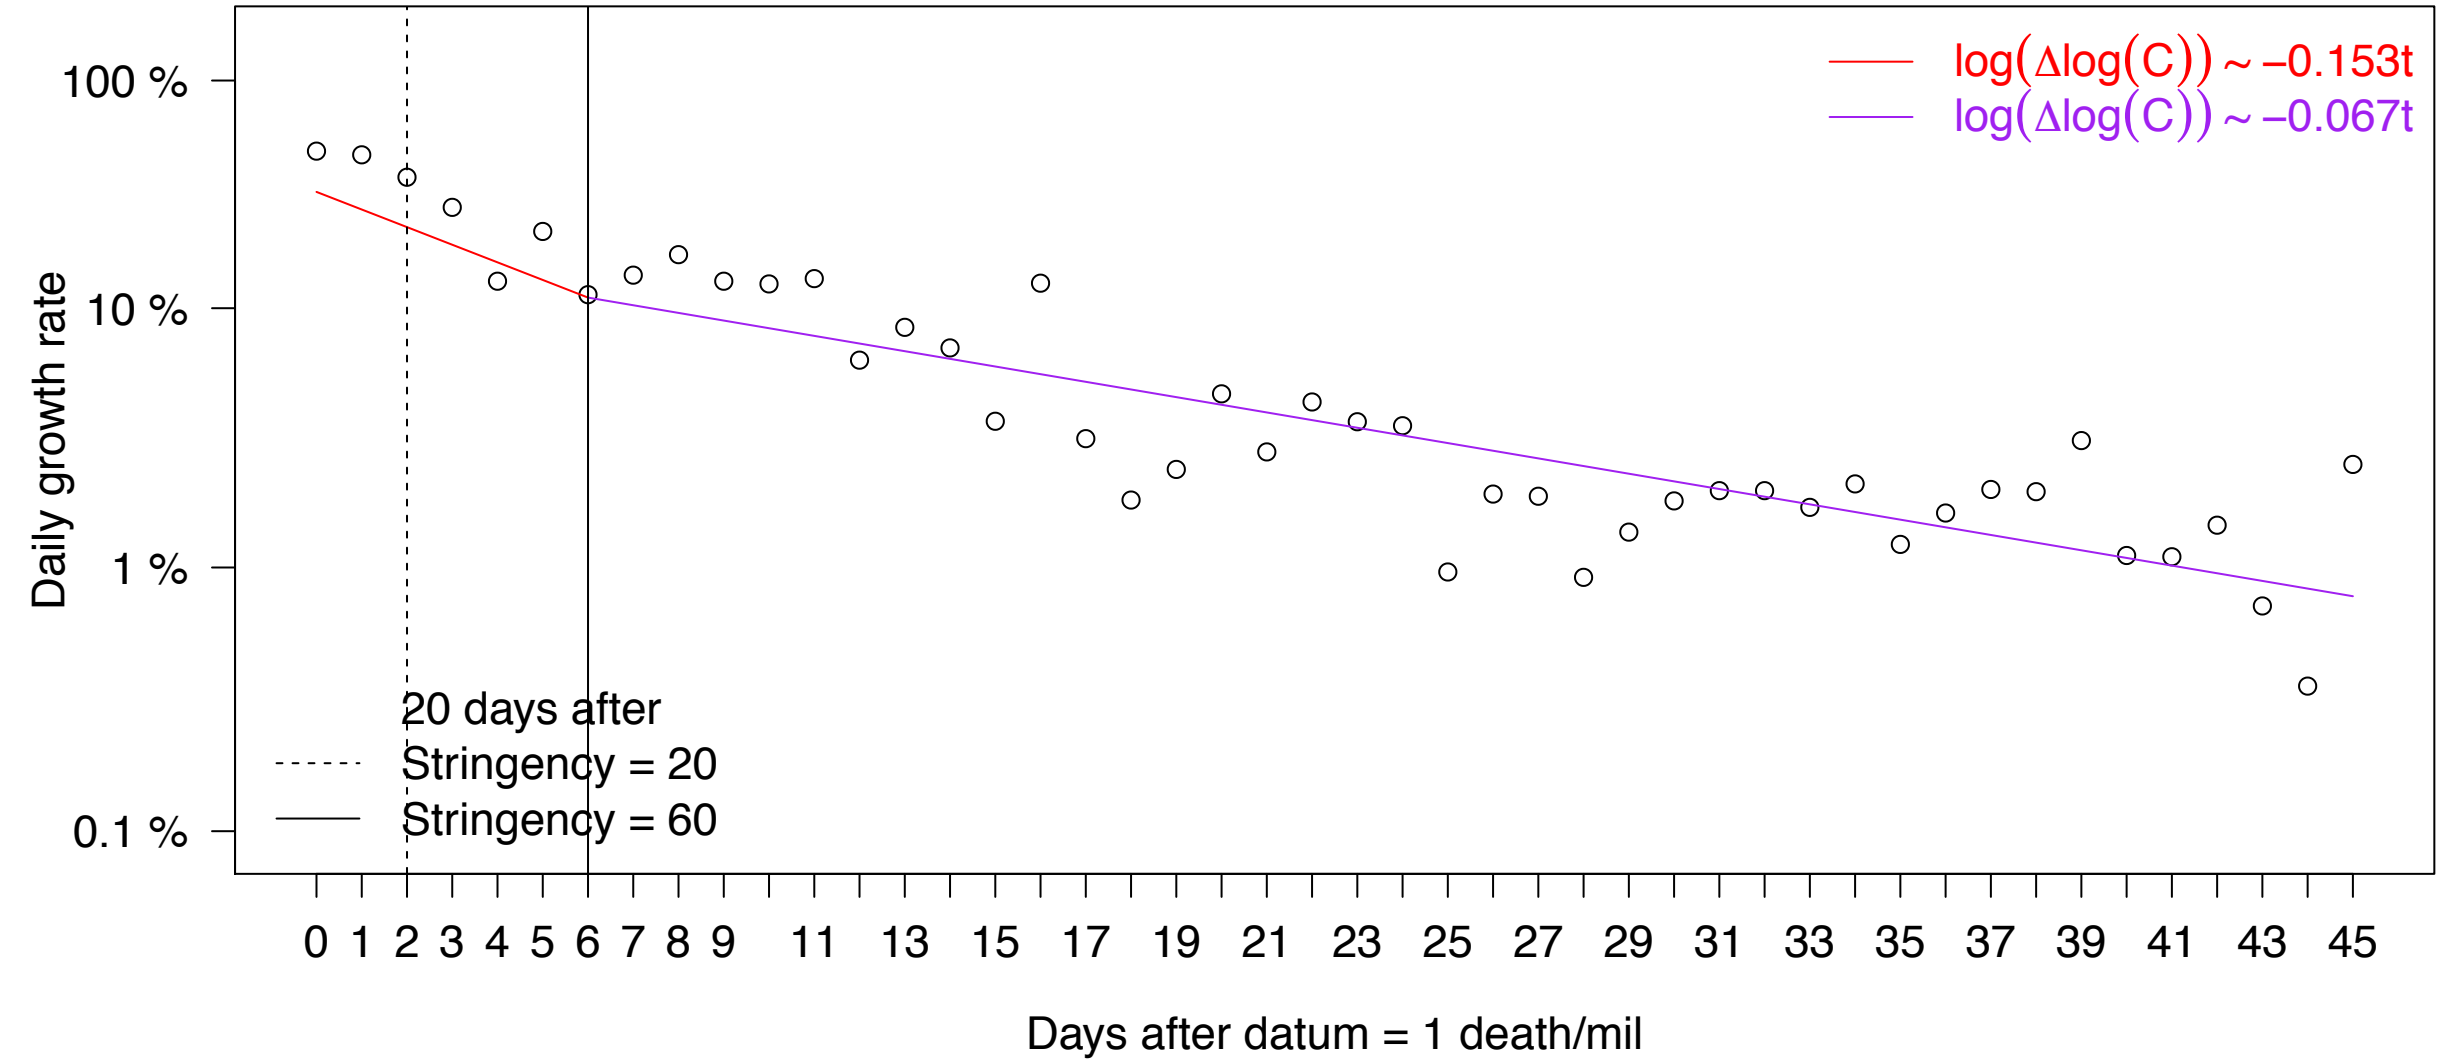



# Denmark

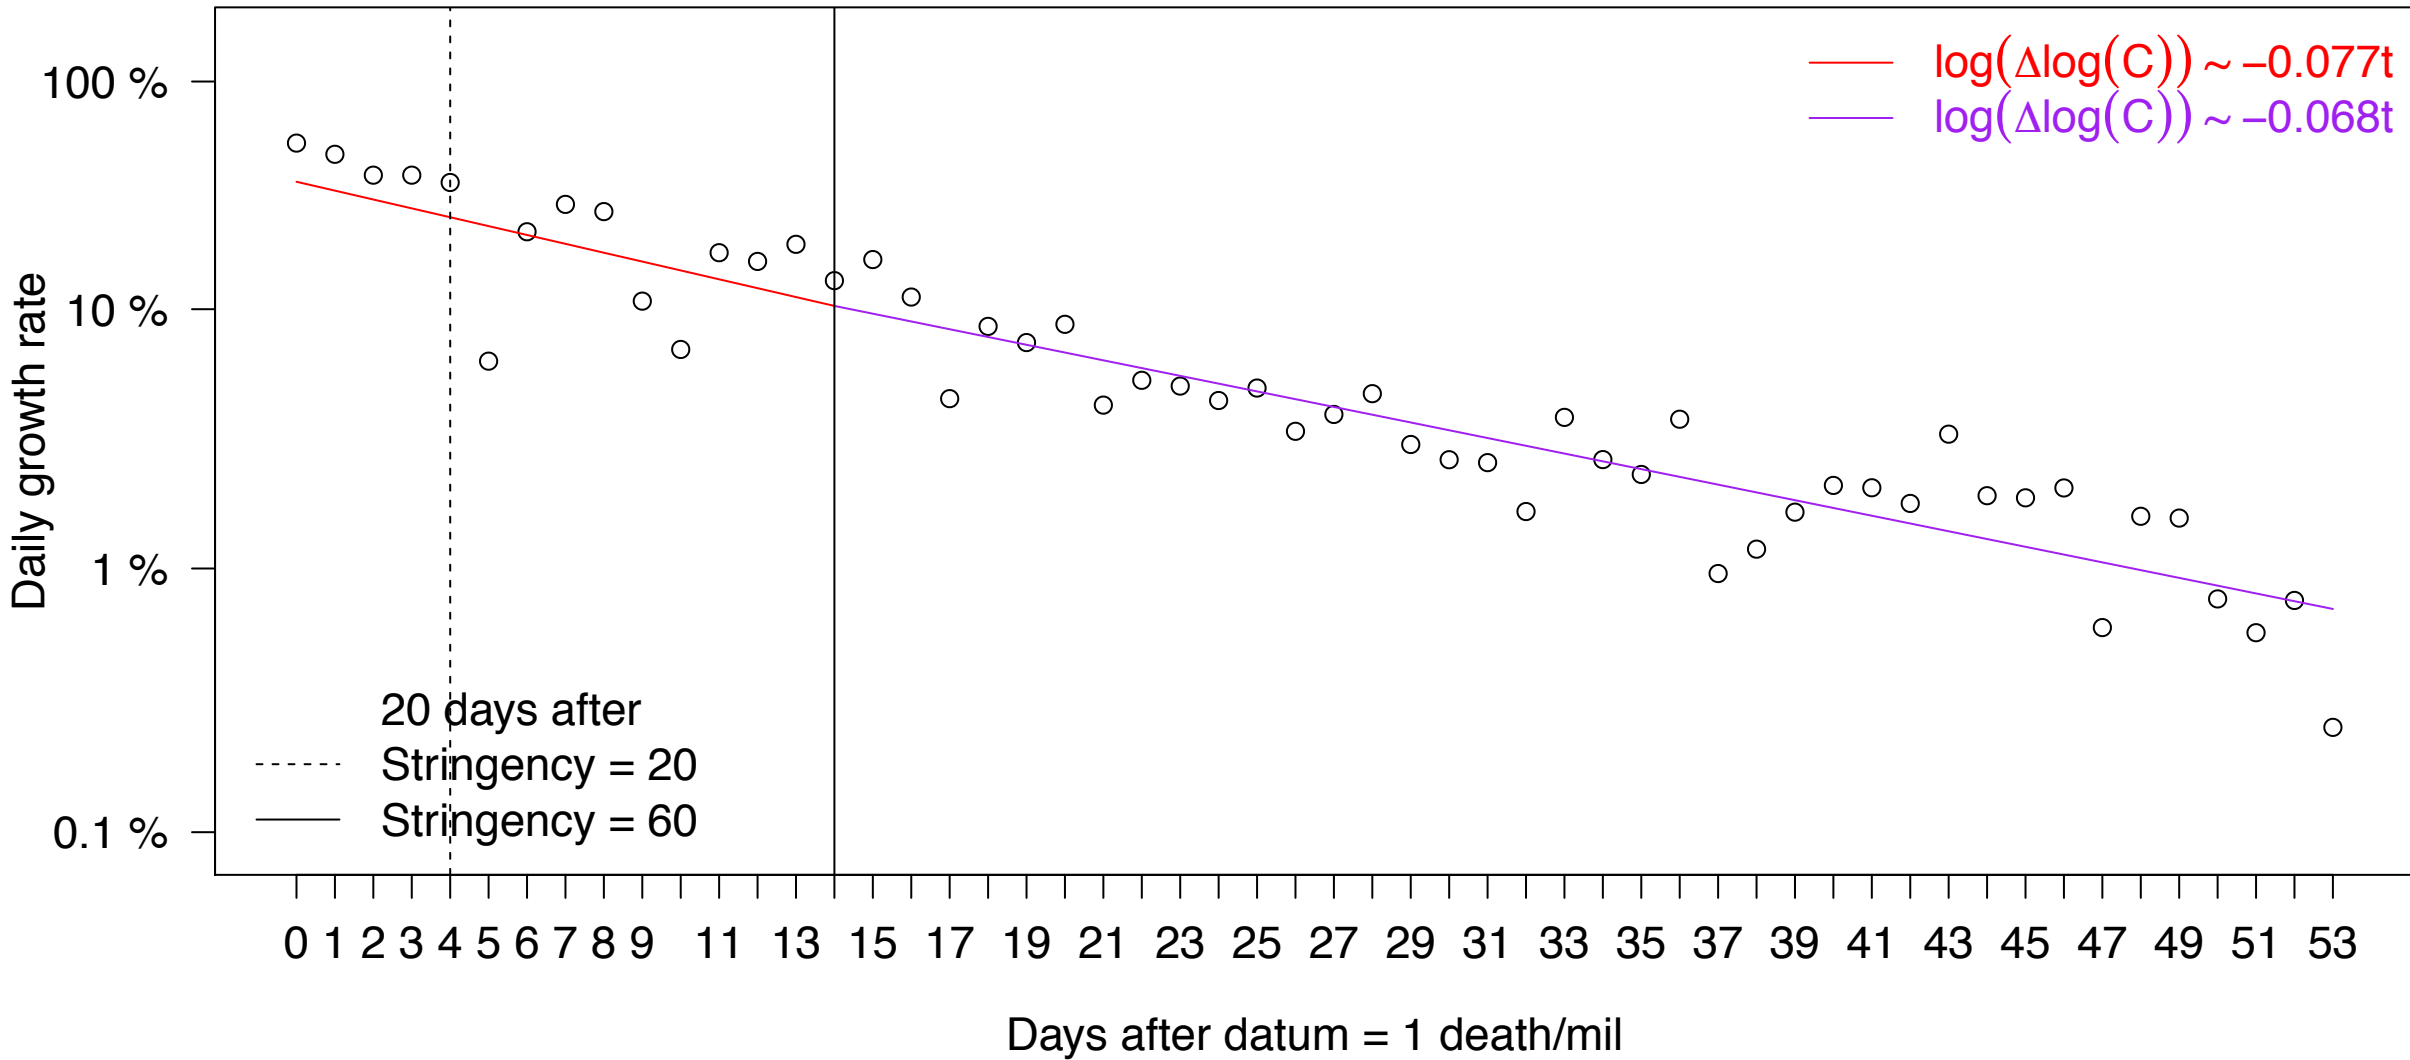

# Estonia

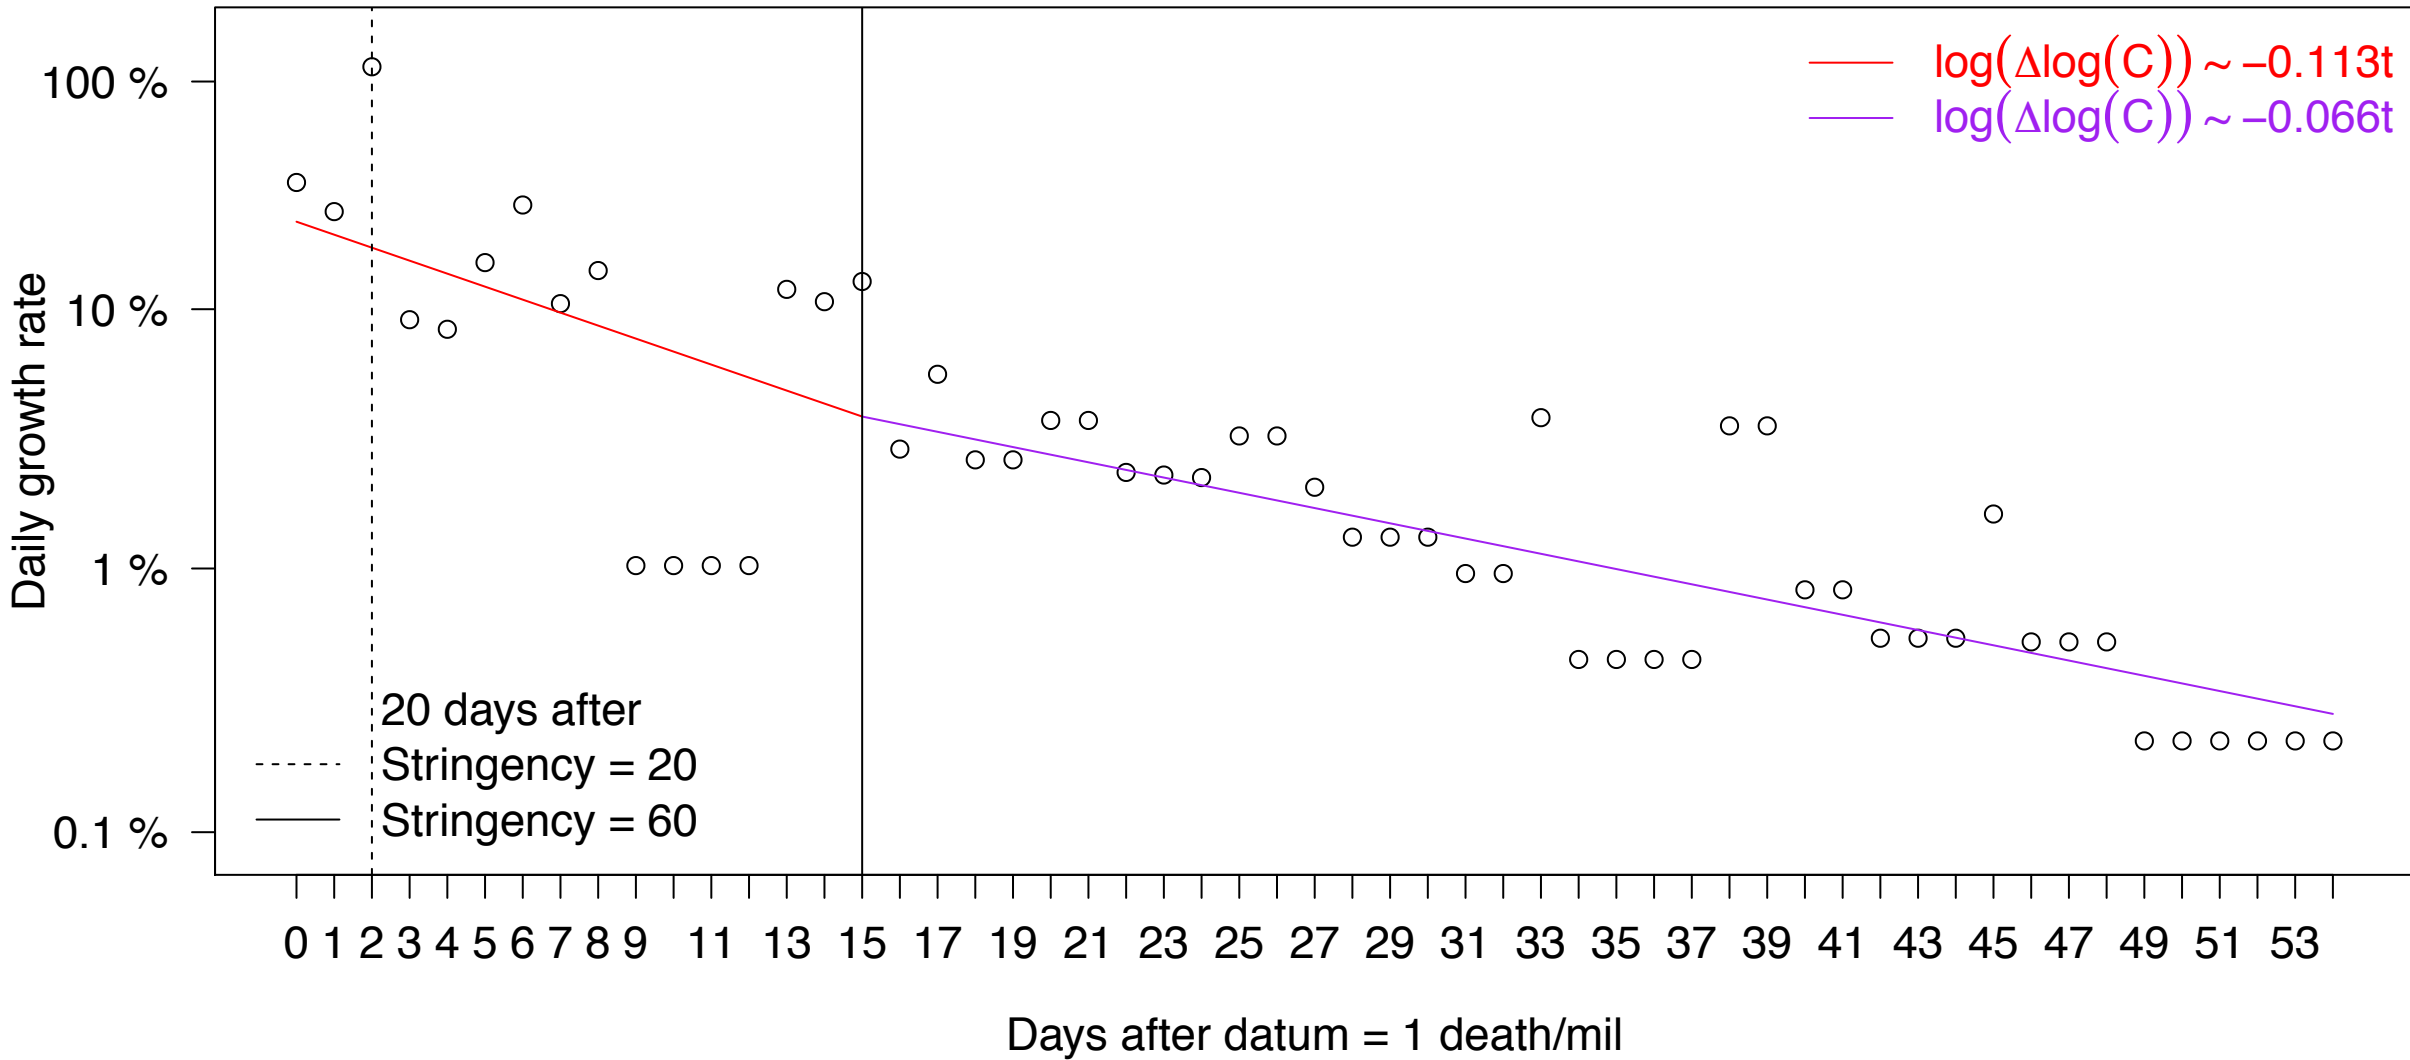

# Finland

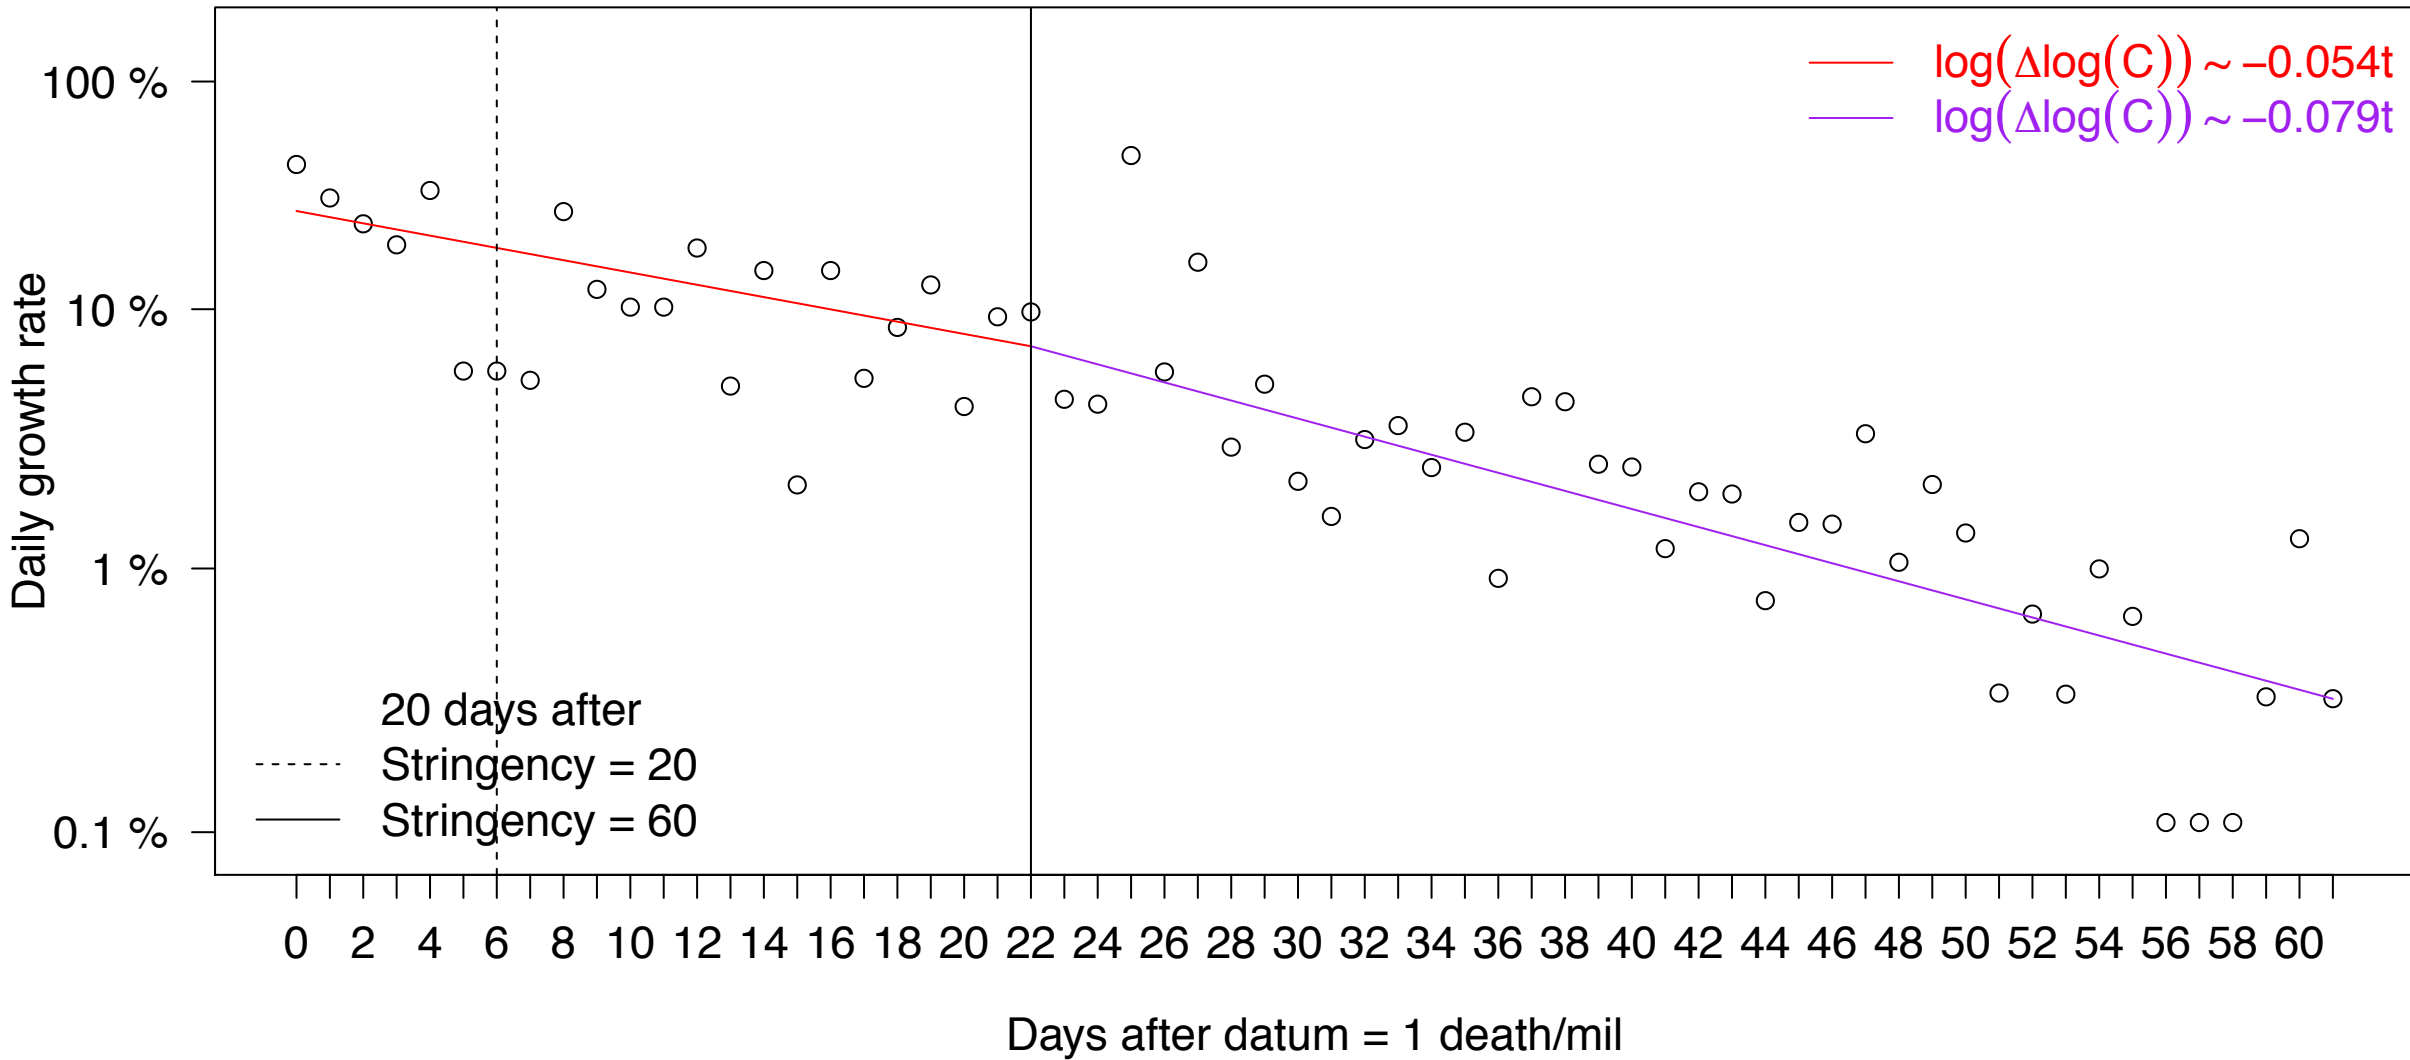

# France

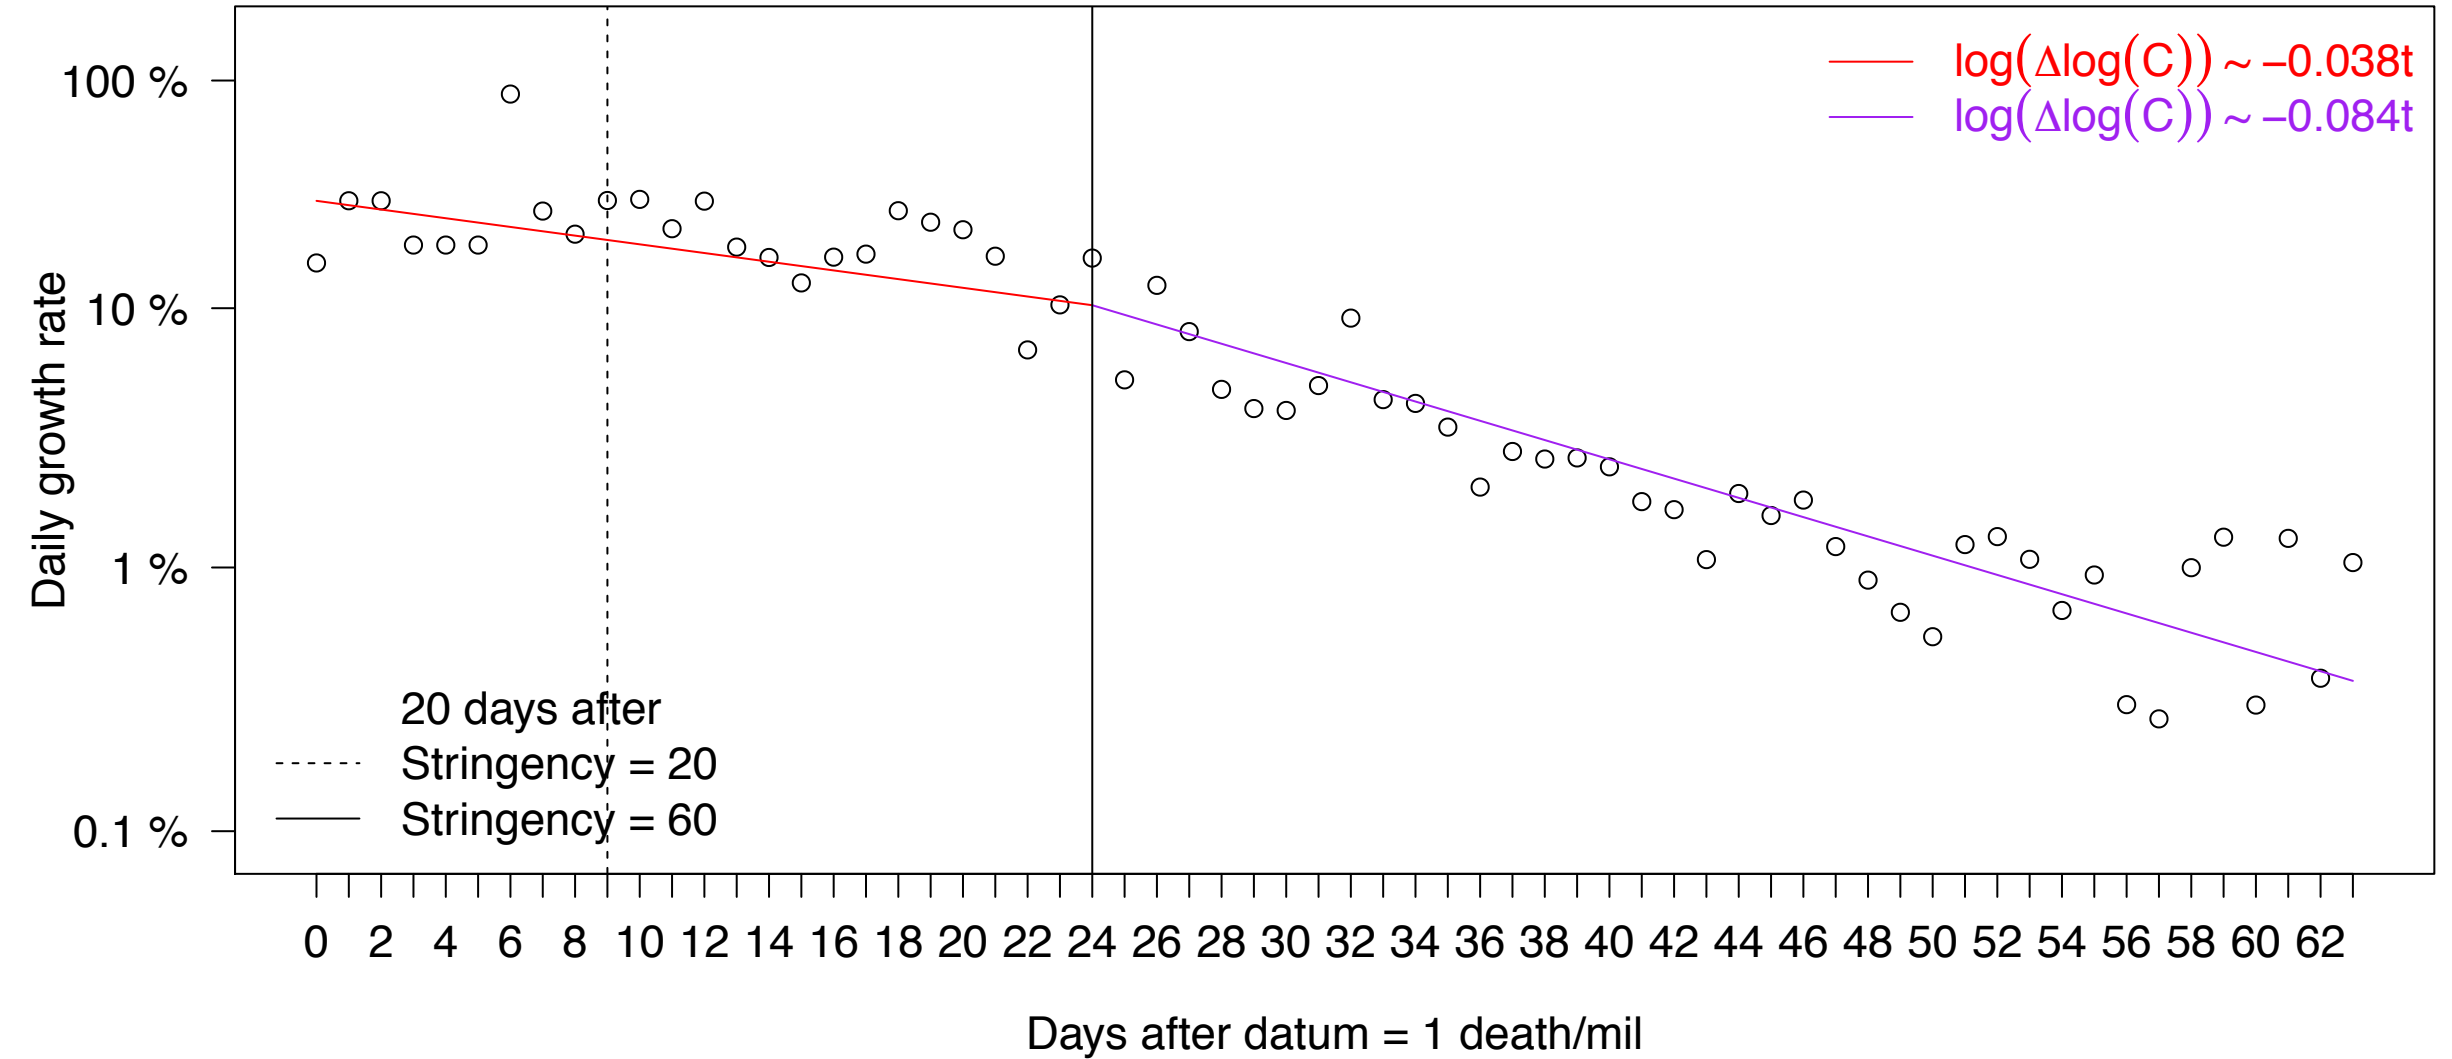

# Germany

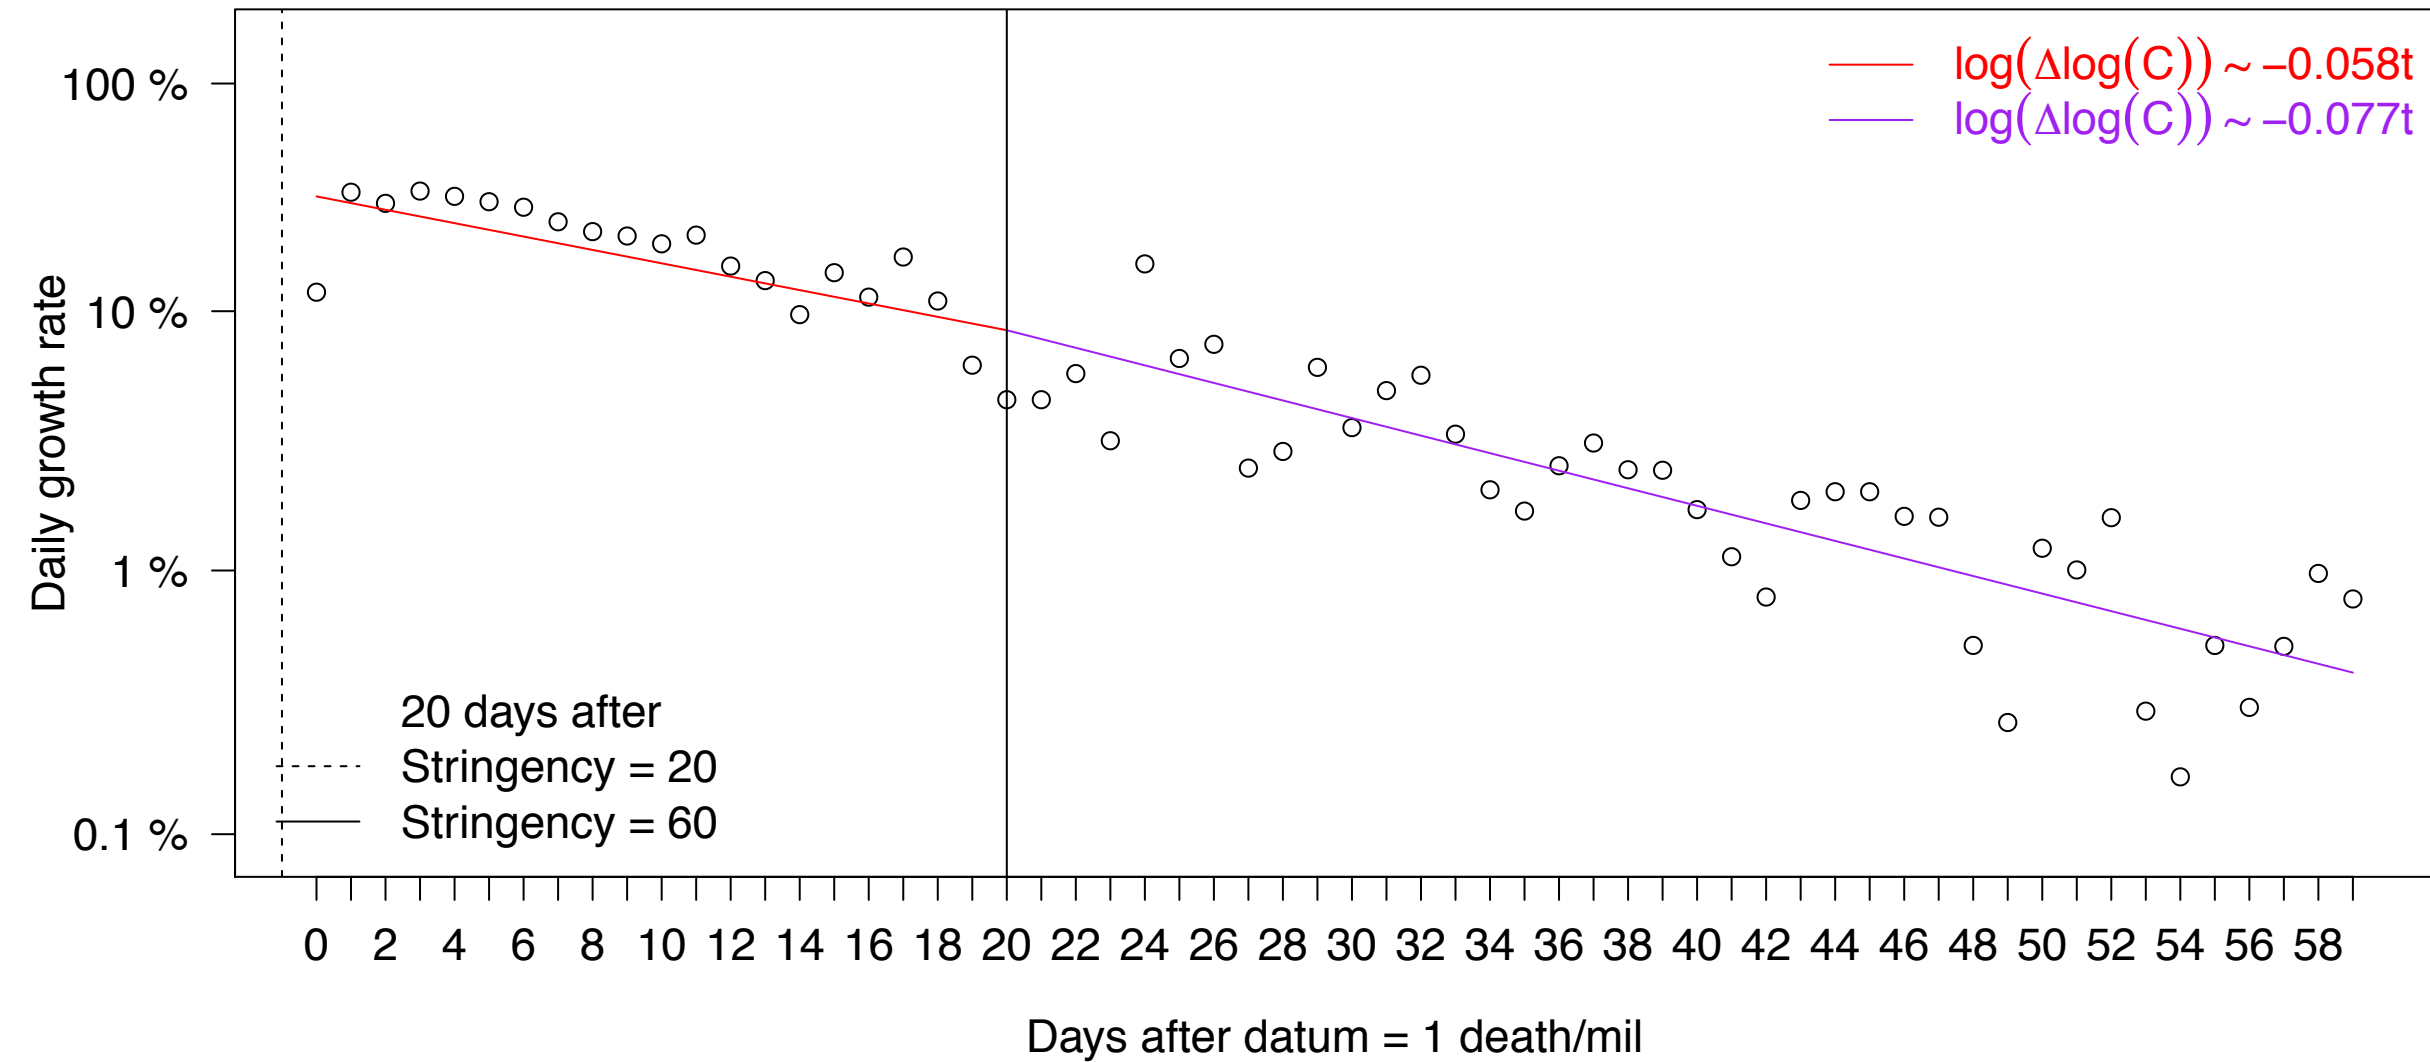

# Greece

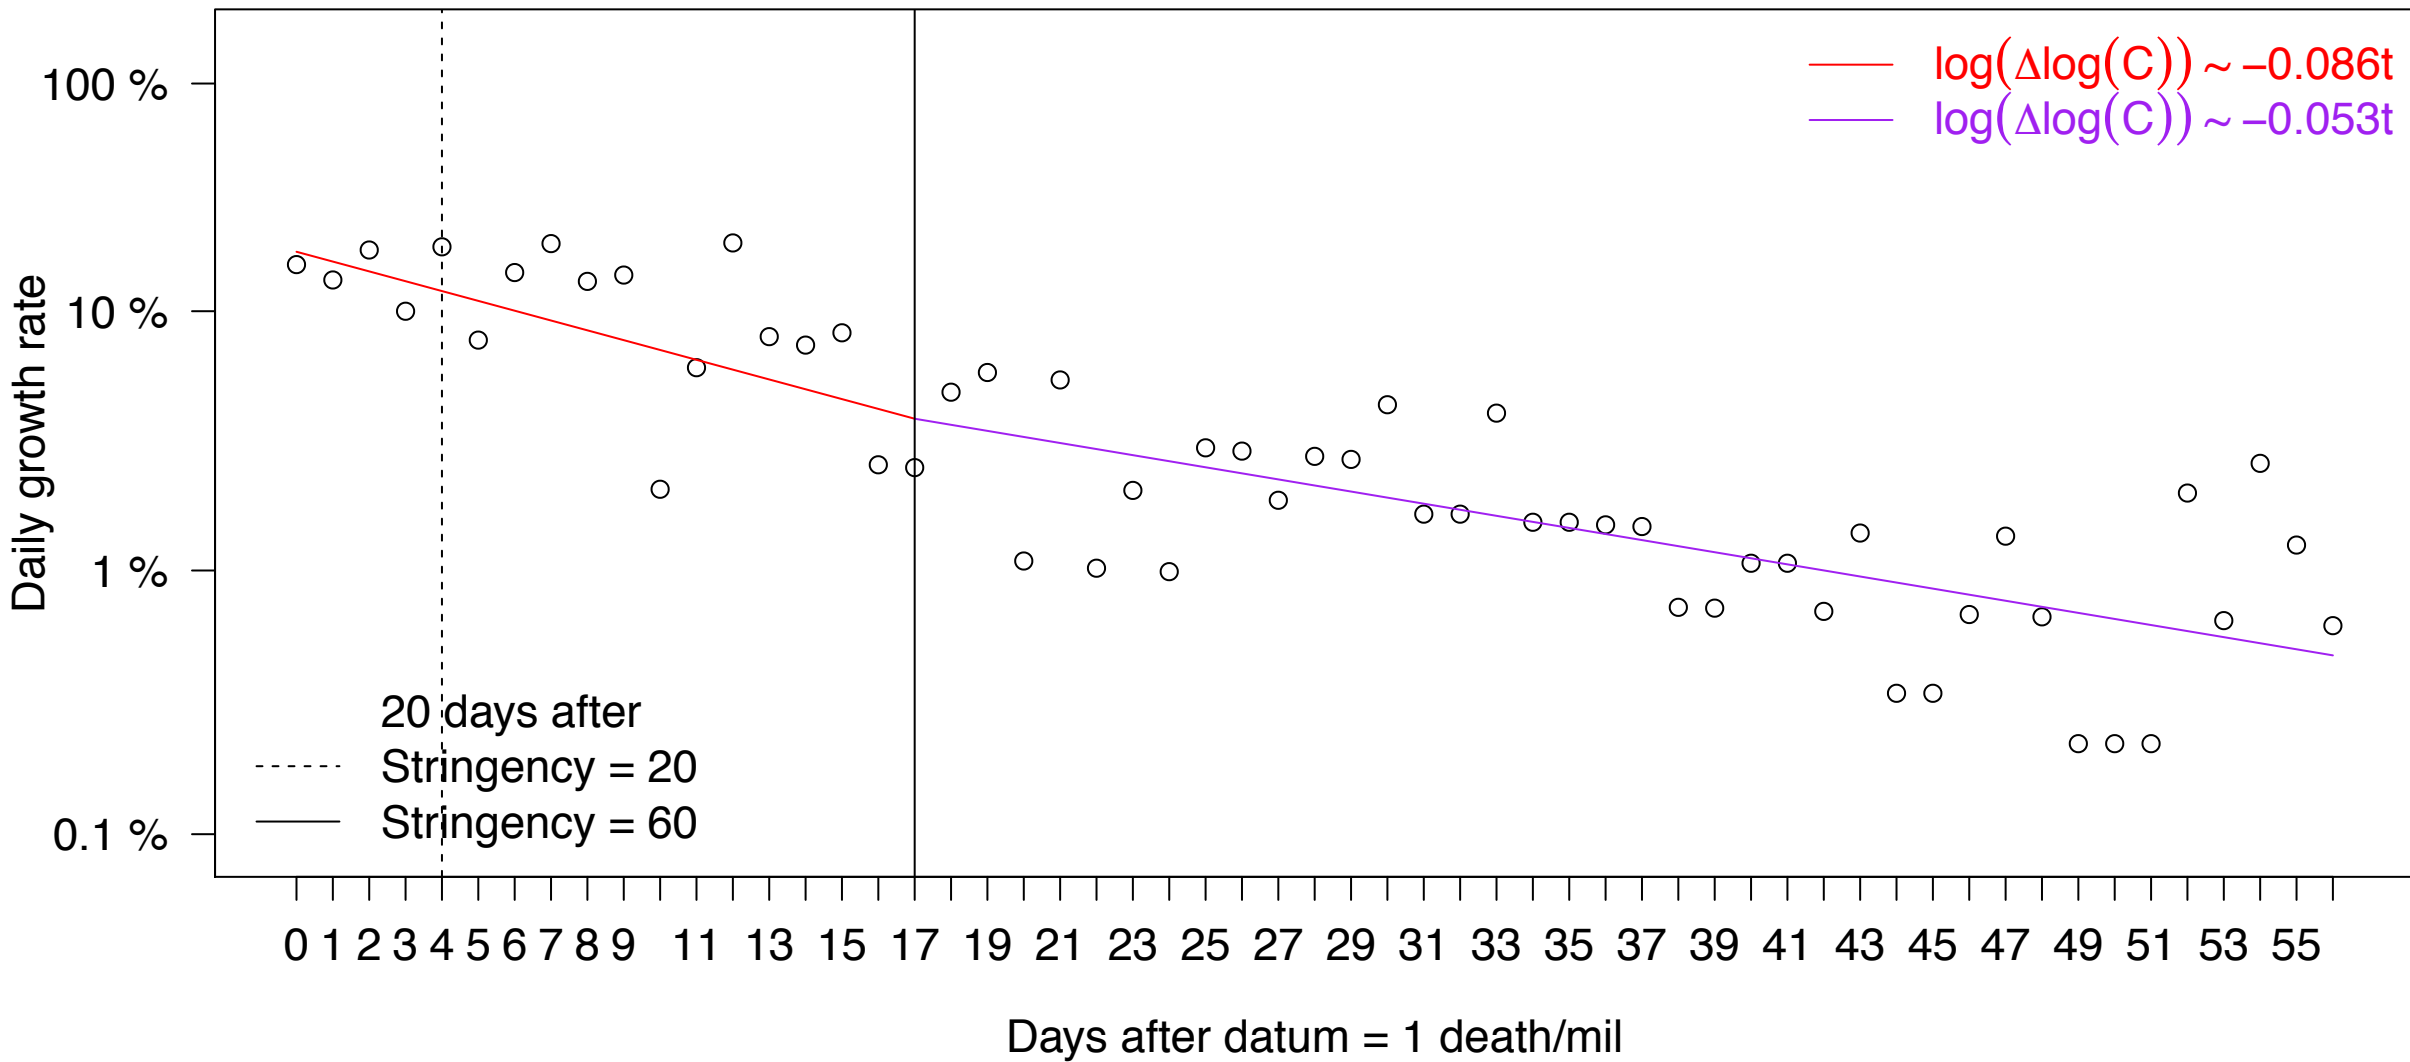

# Hungary

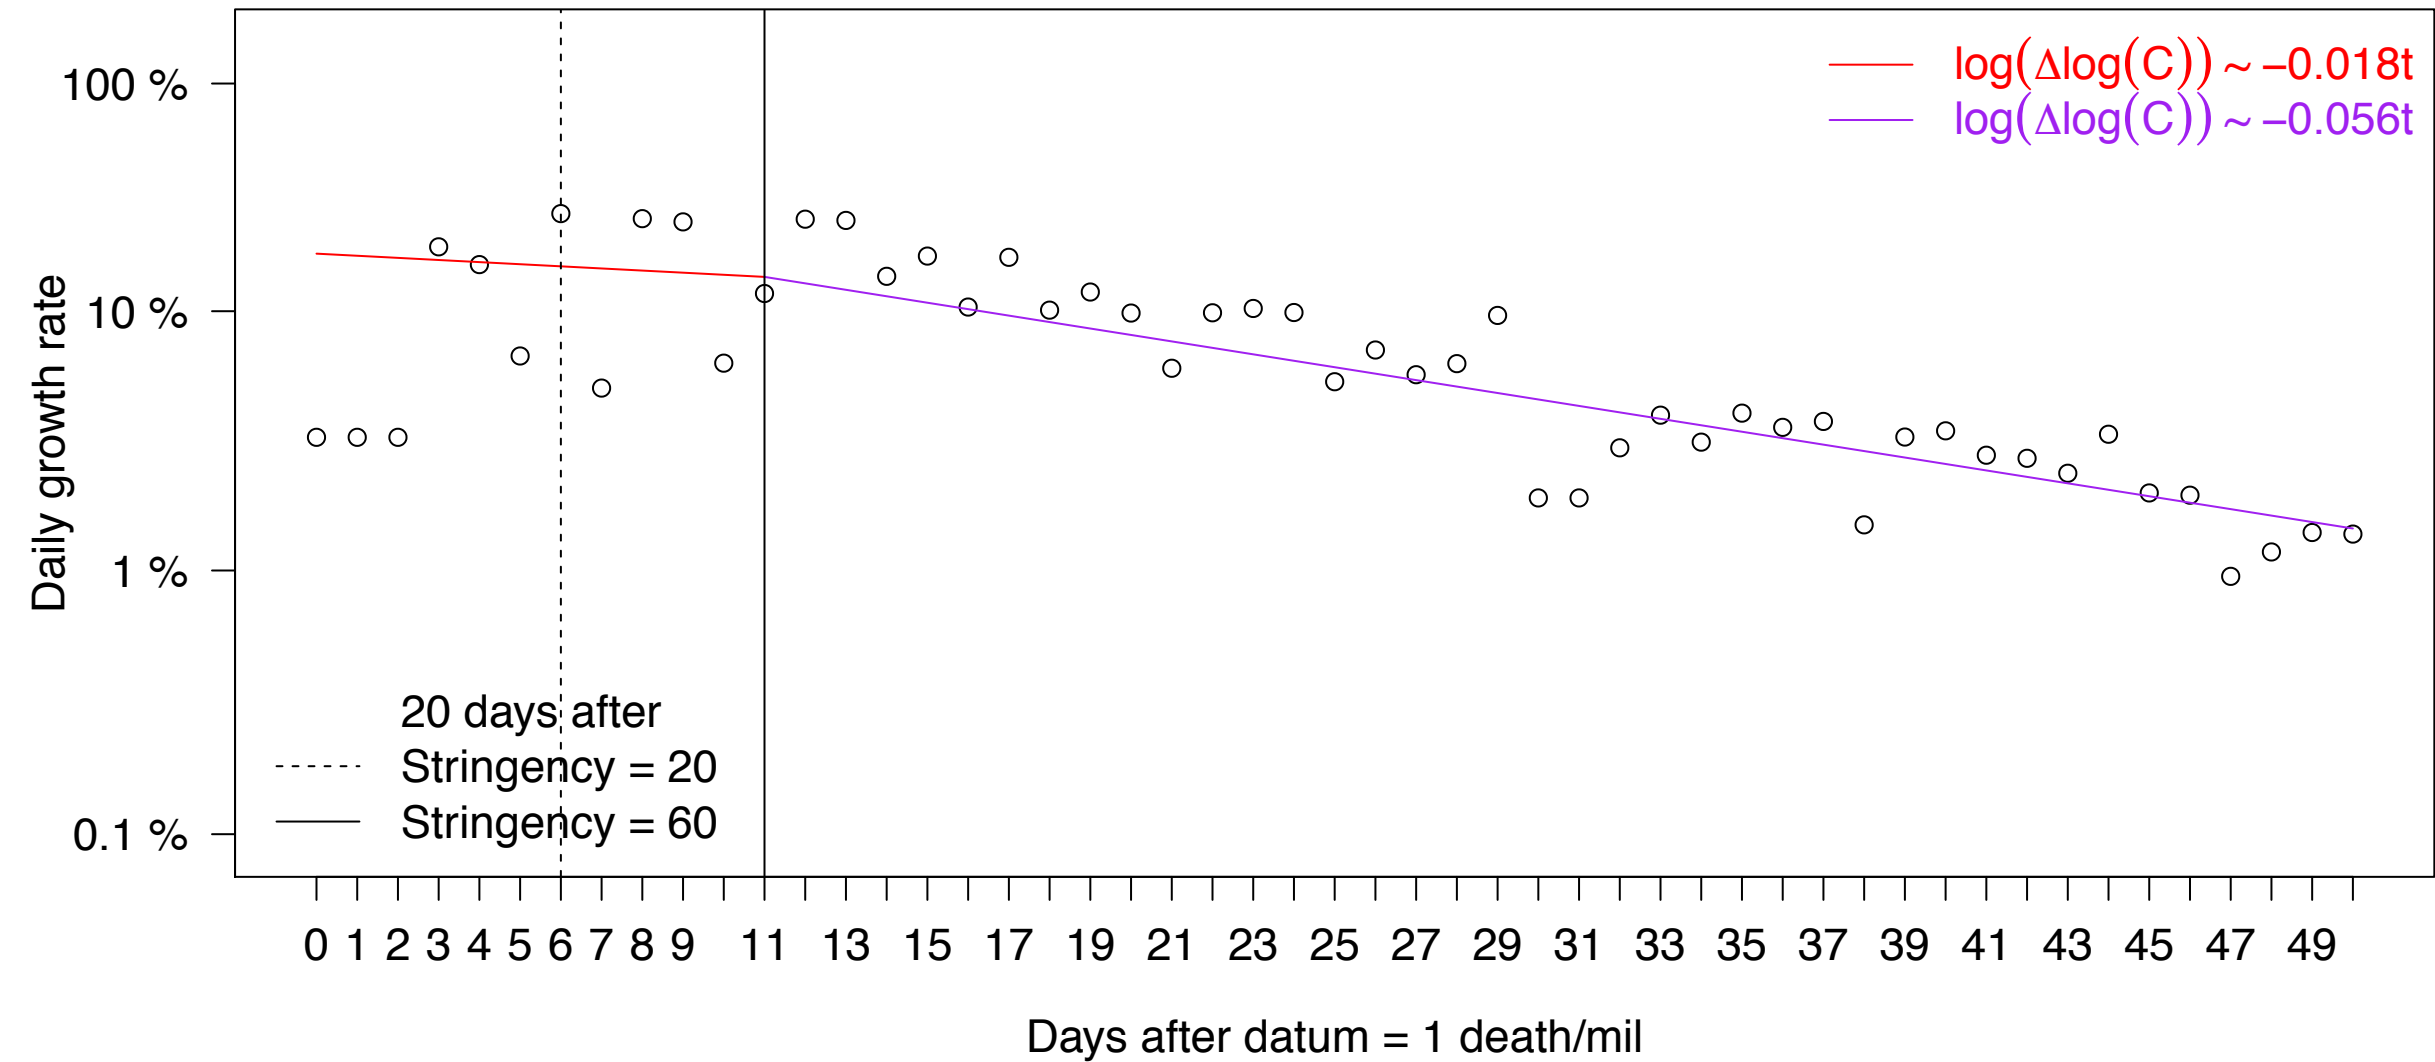

# Ireland

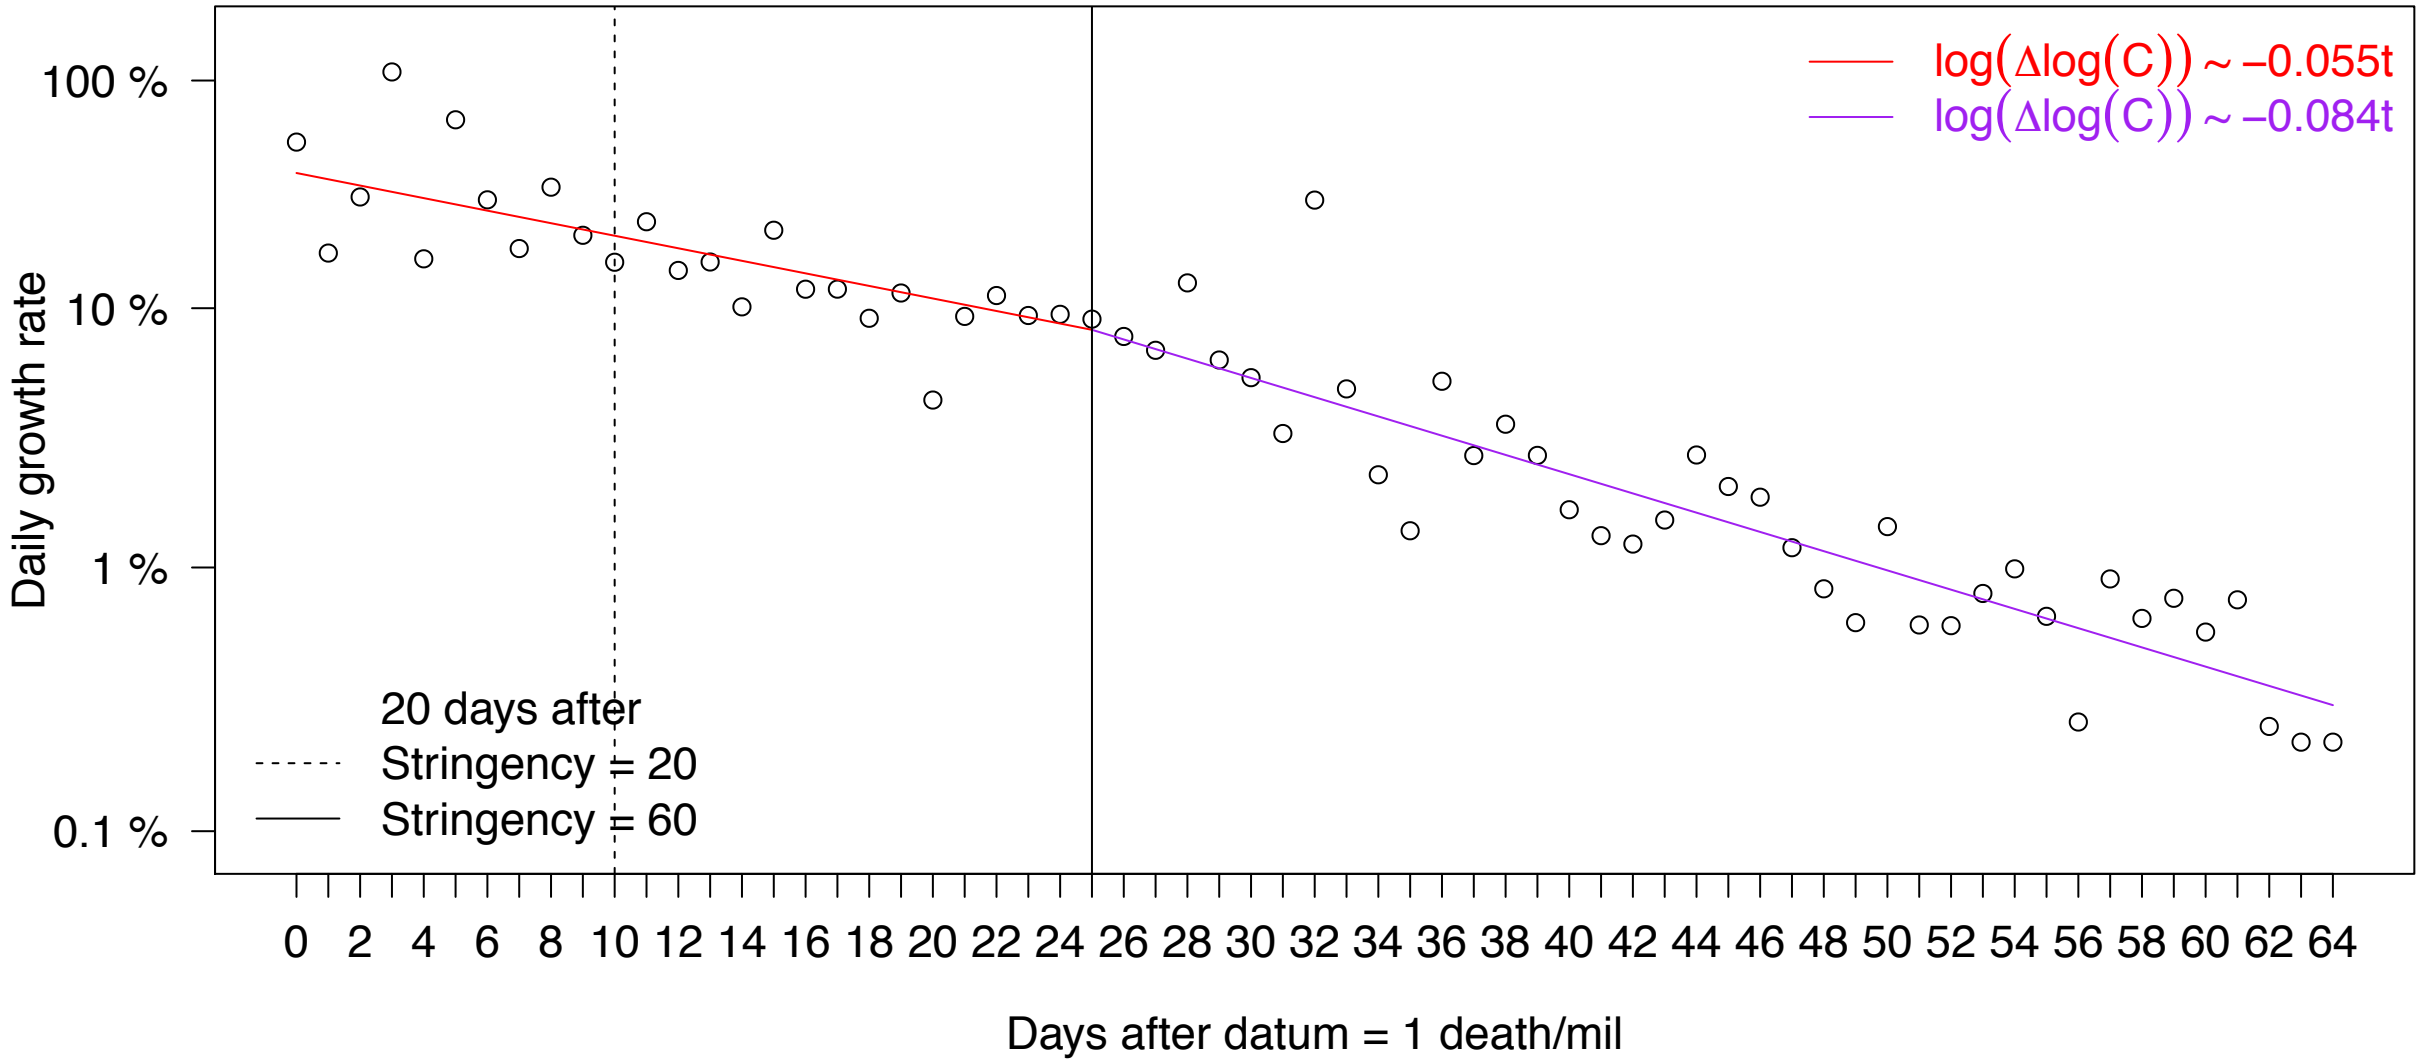



# Italy

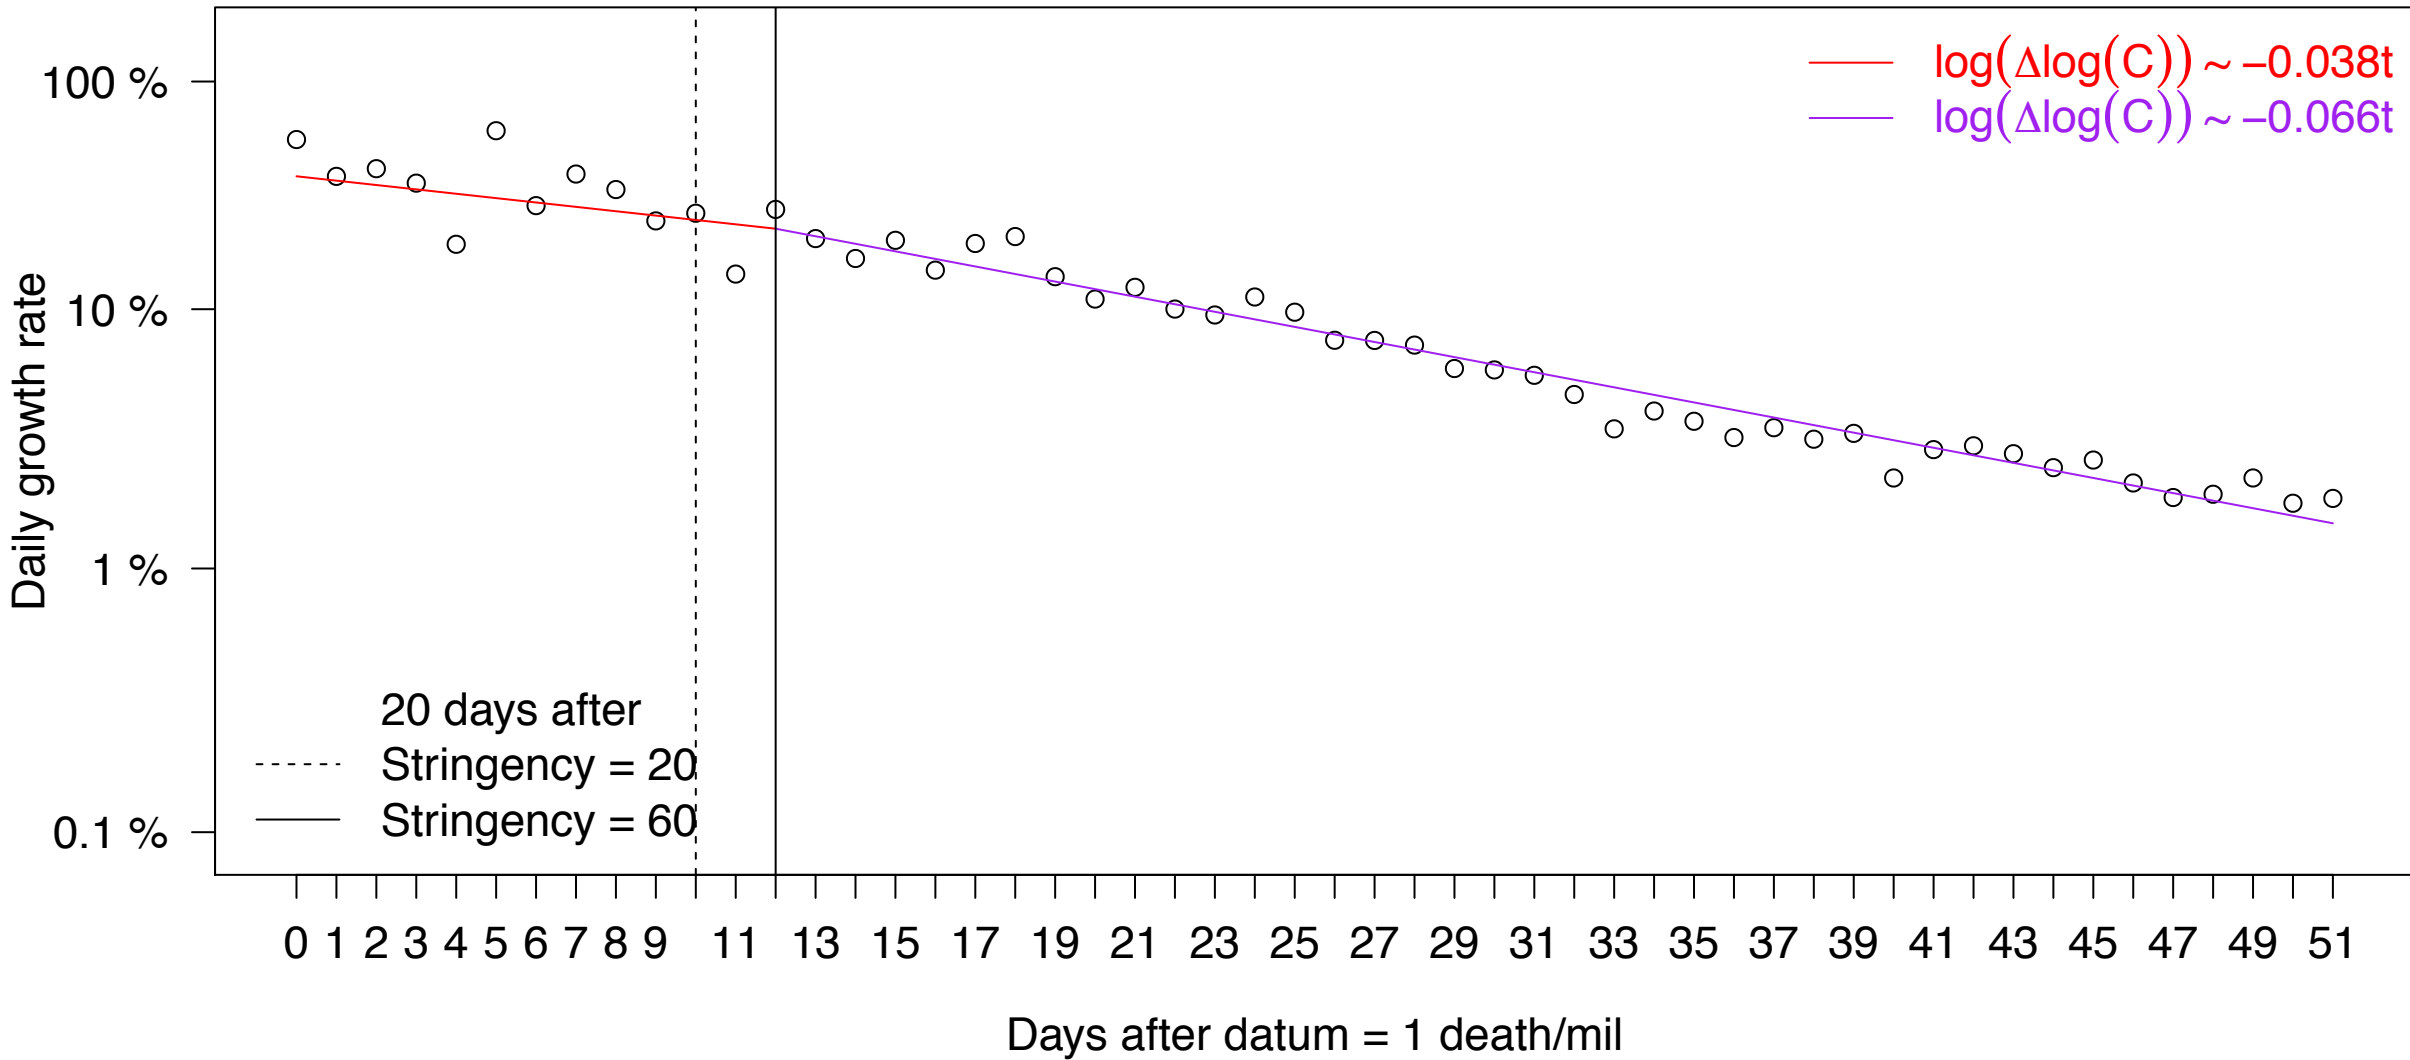

# Lithuania

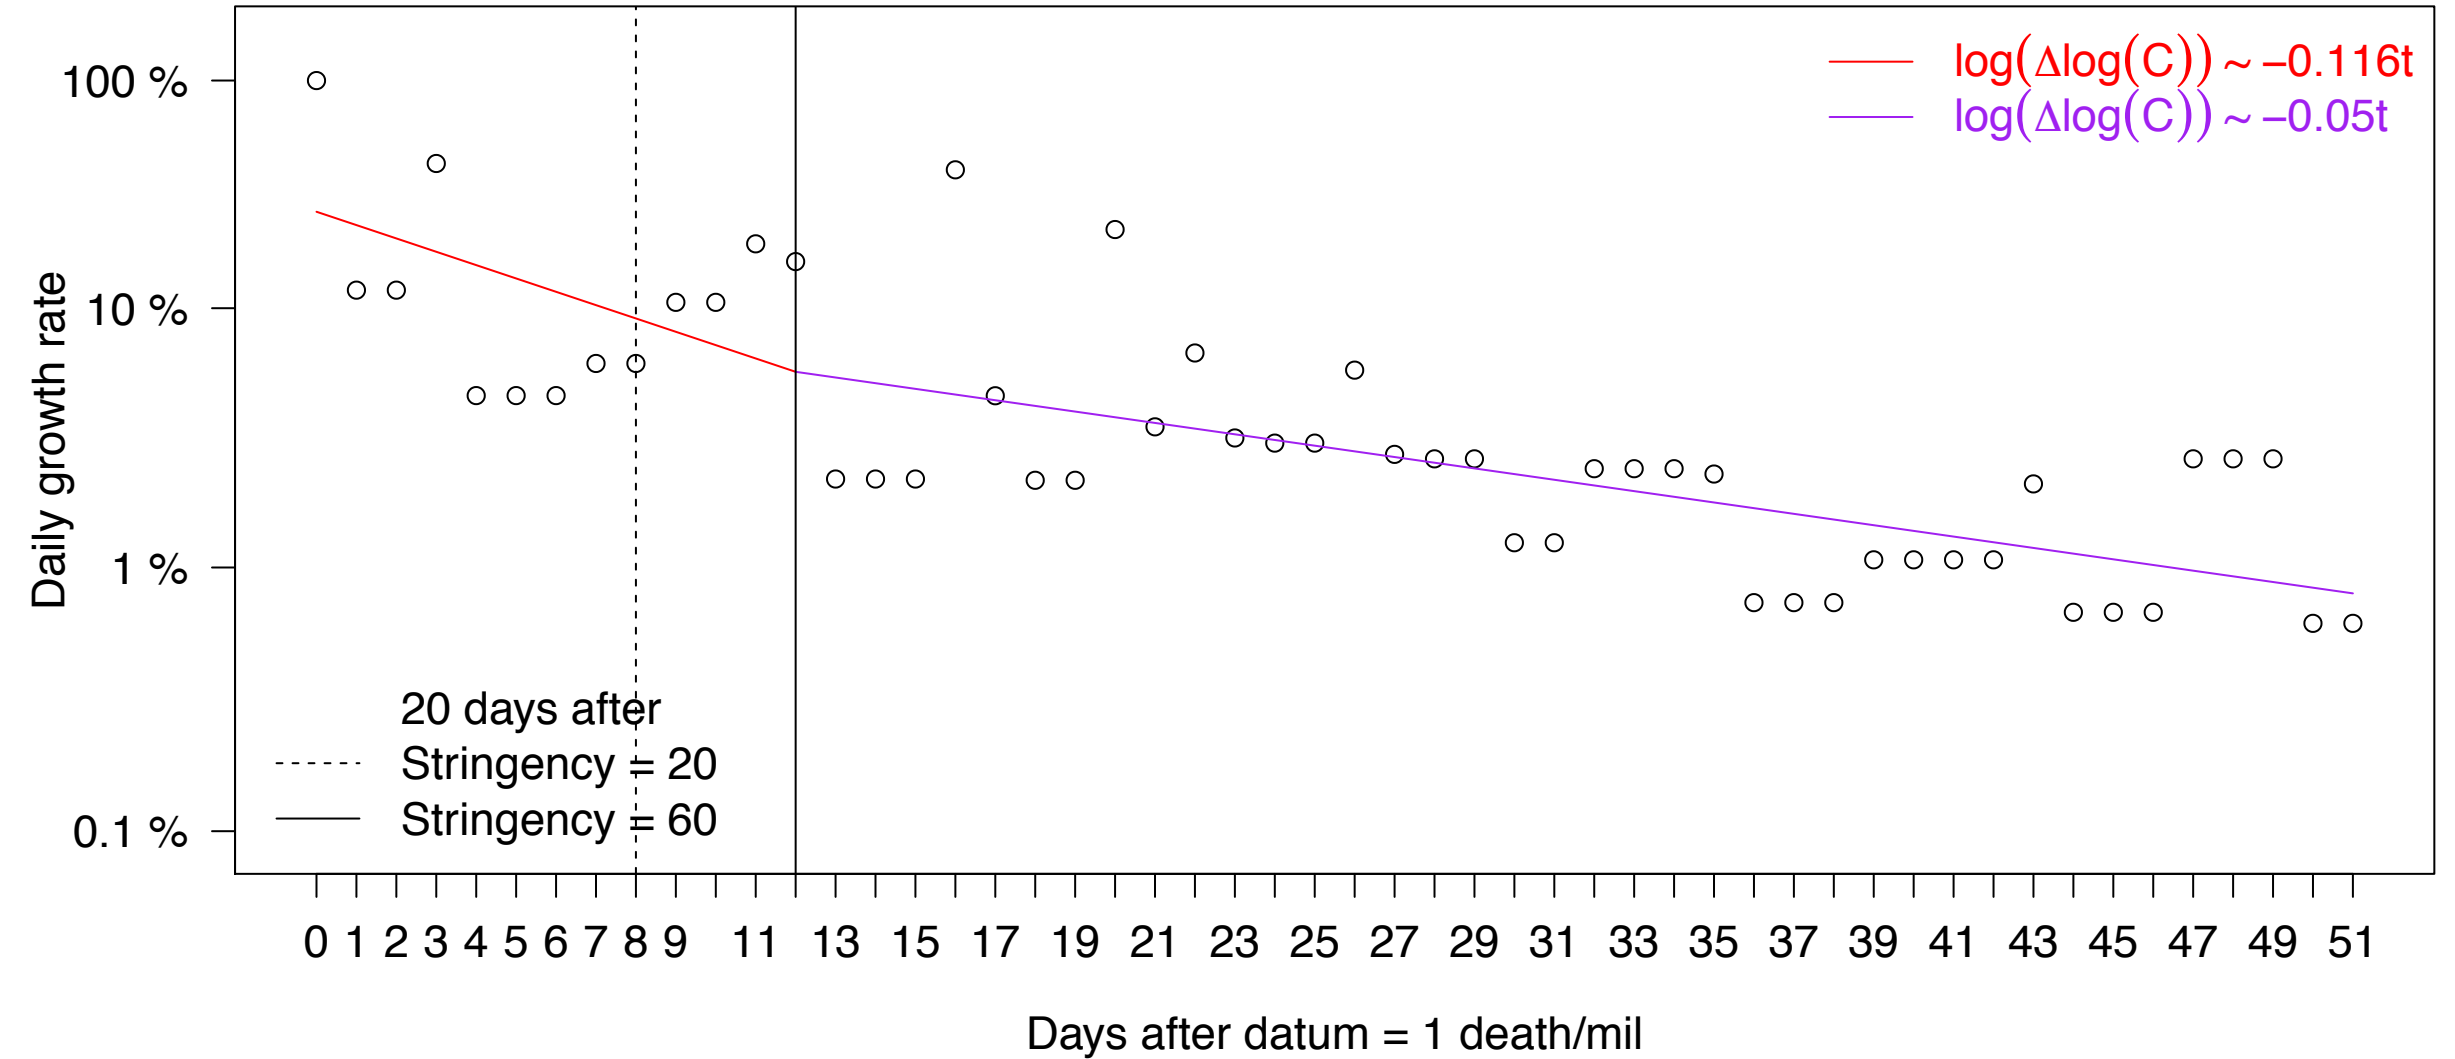

# Moldova

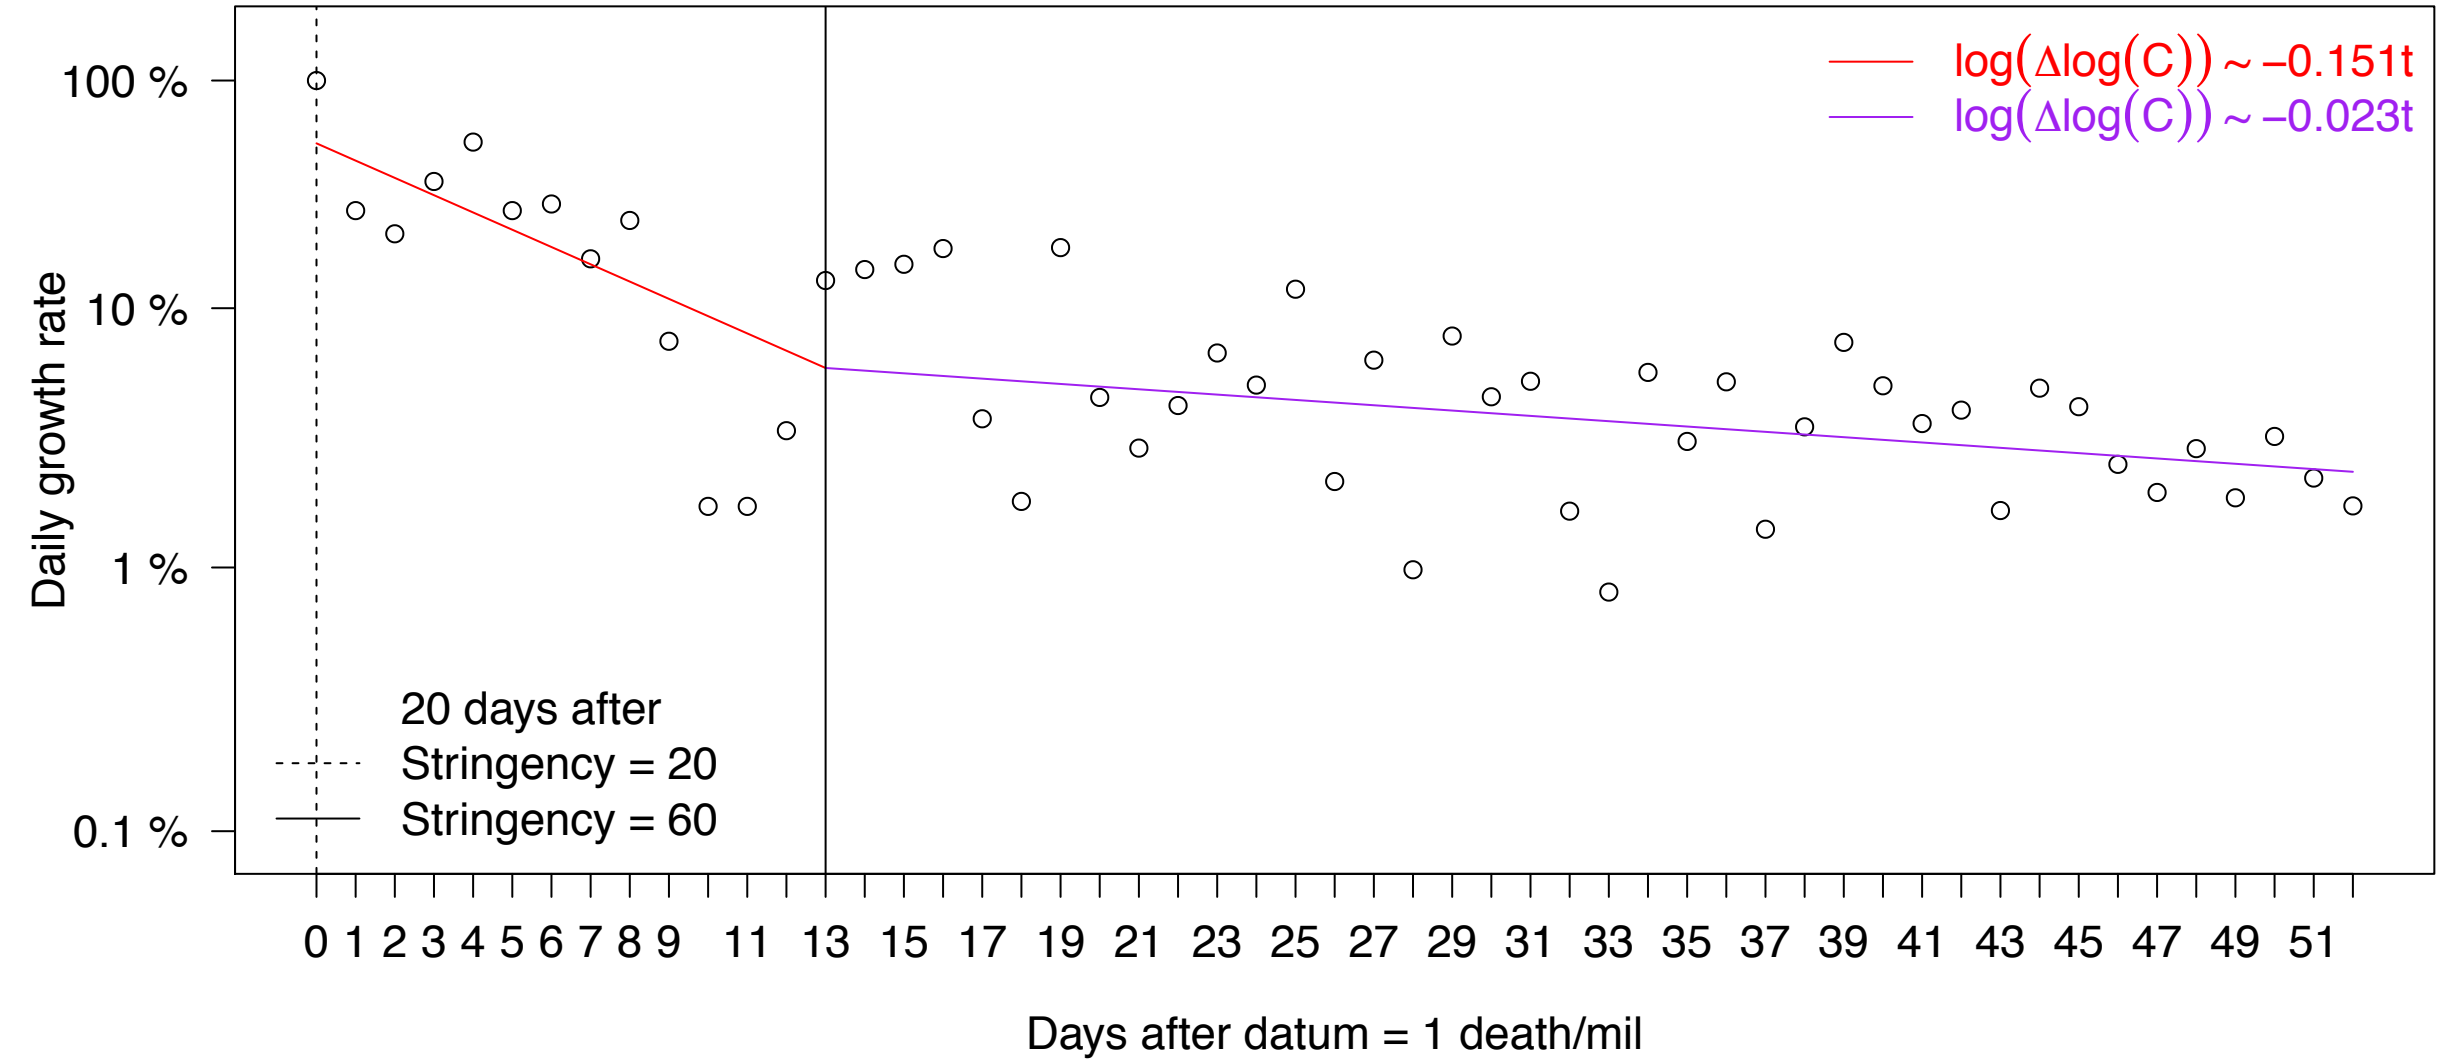

# Netherlands

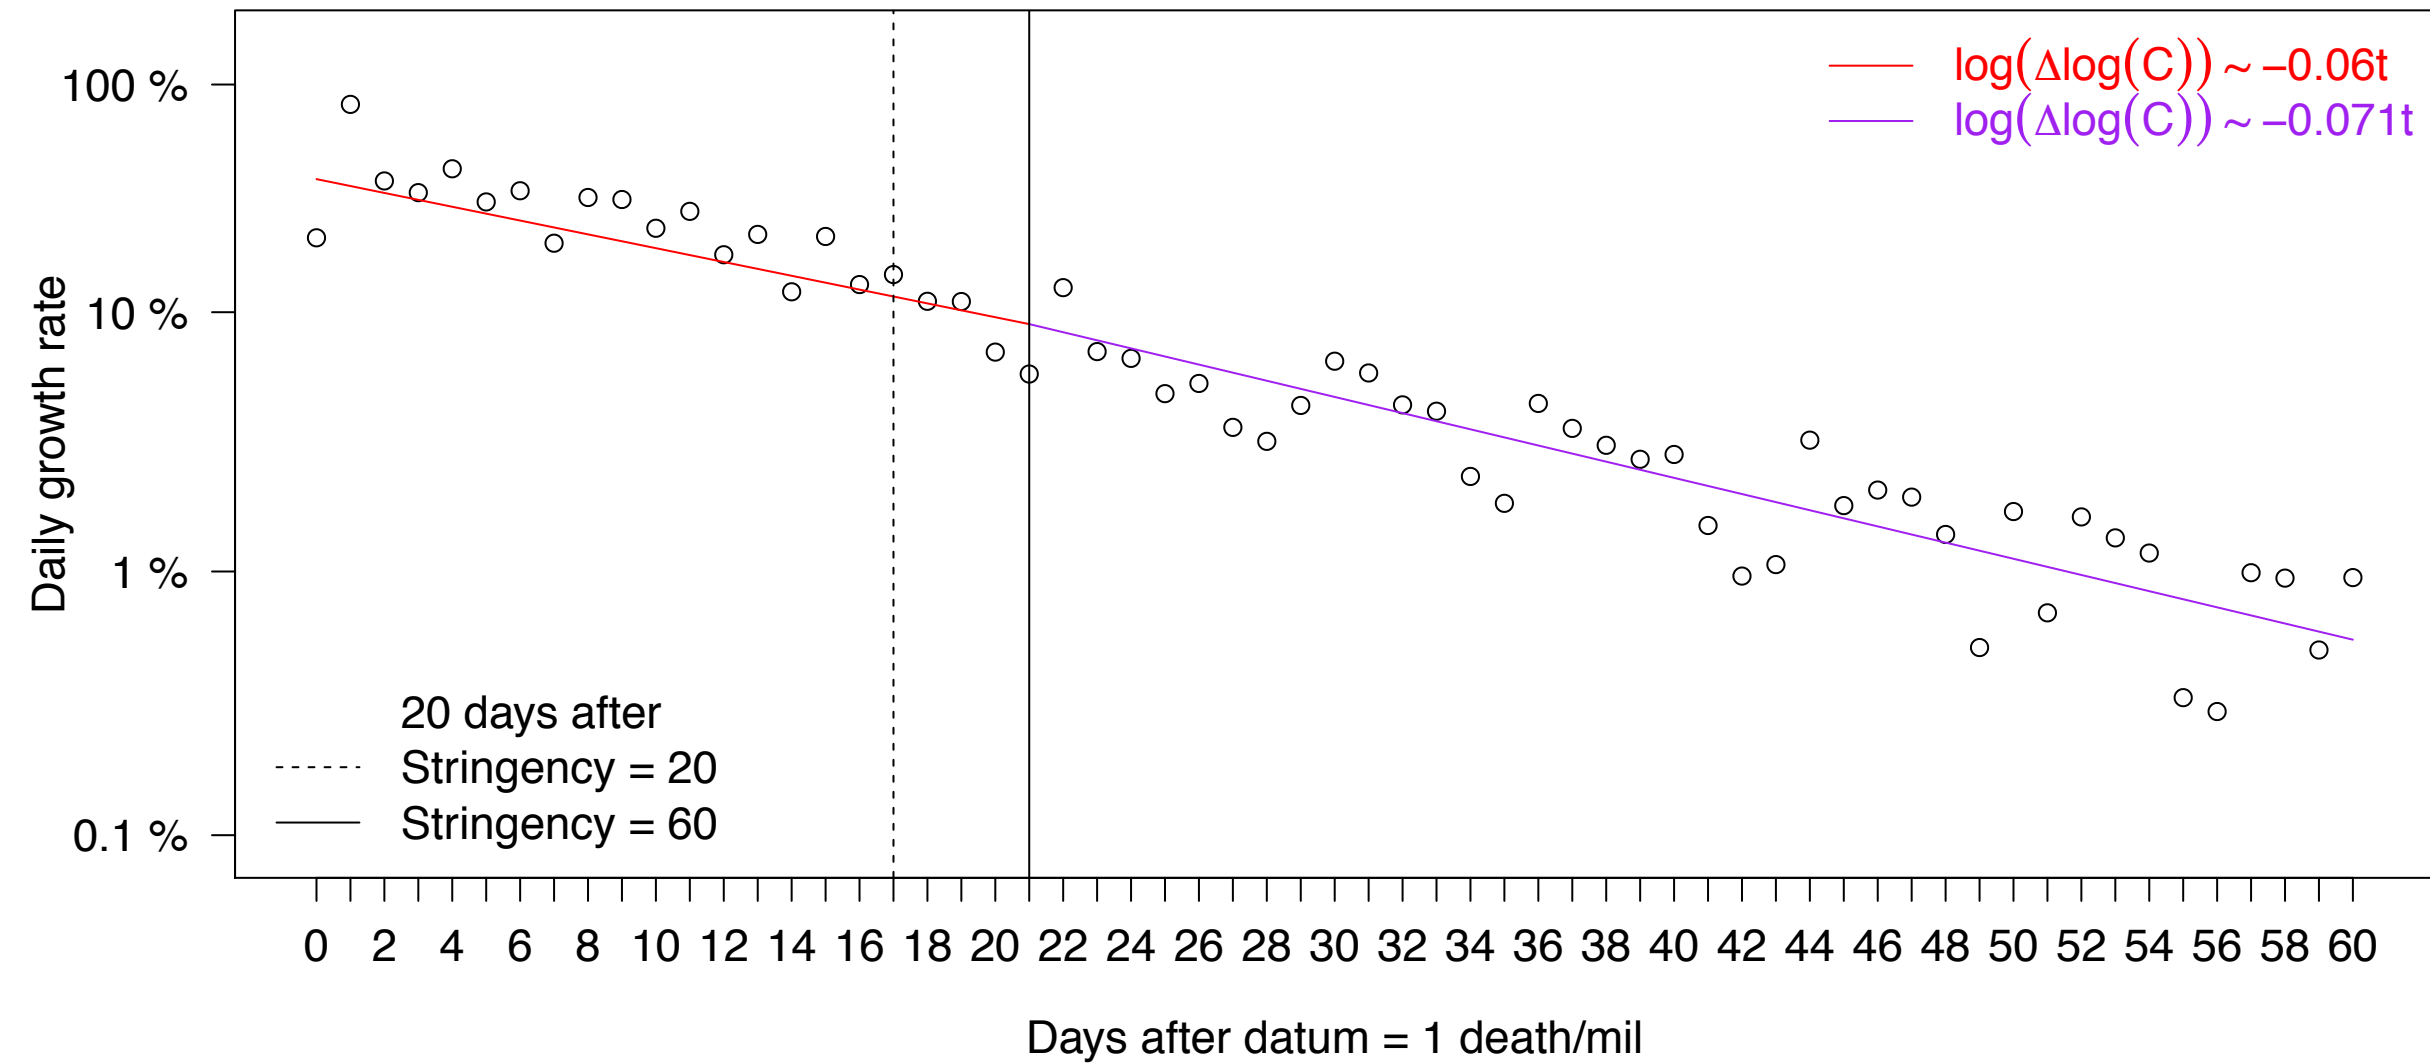

# Norway

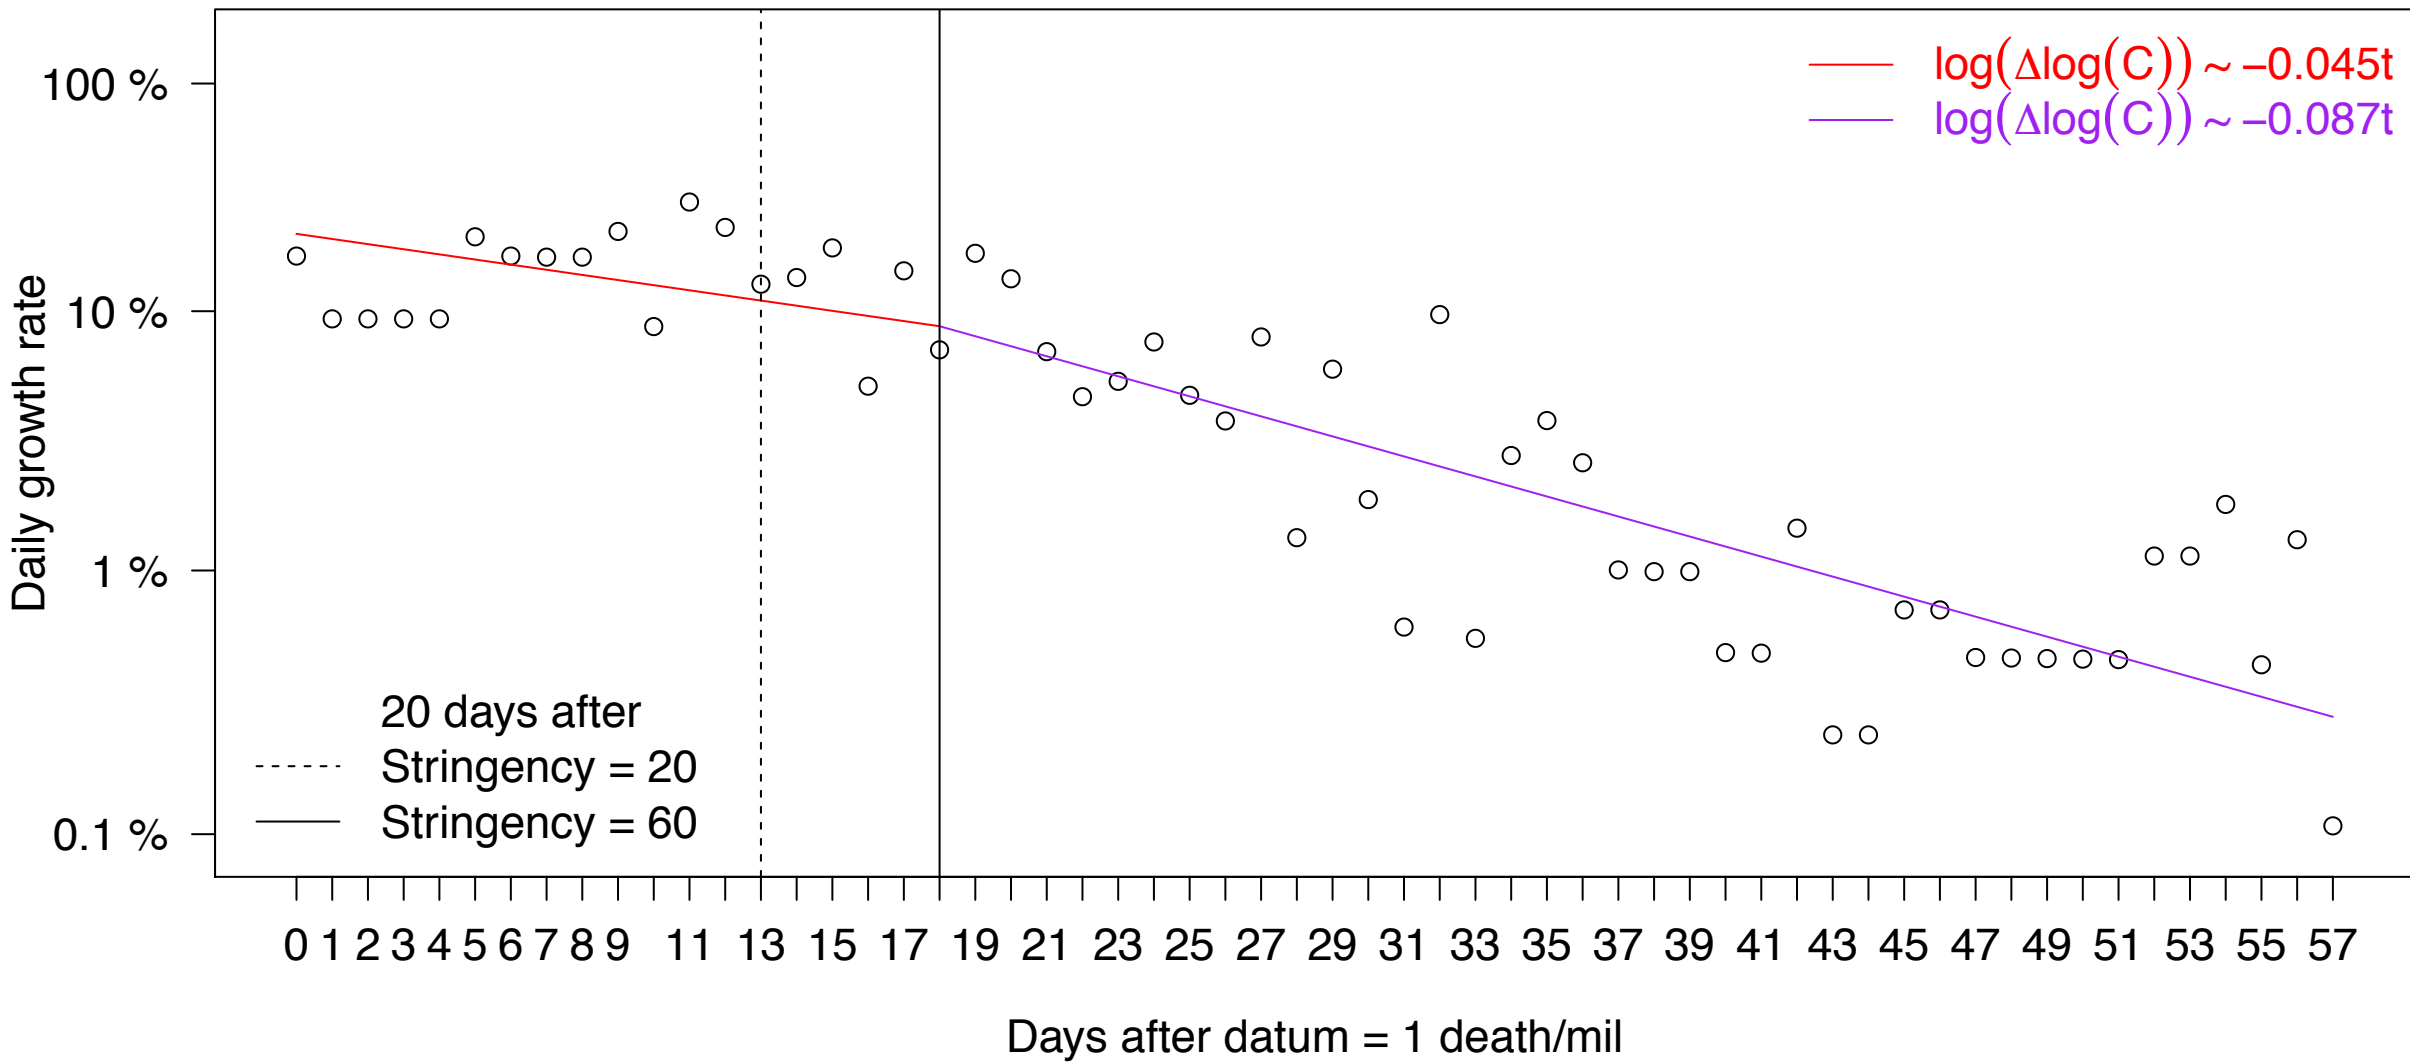

# Poland

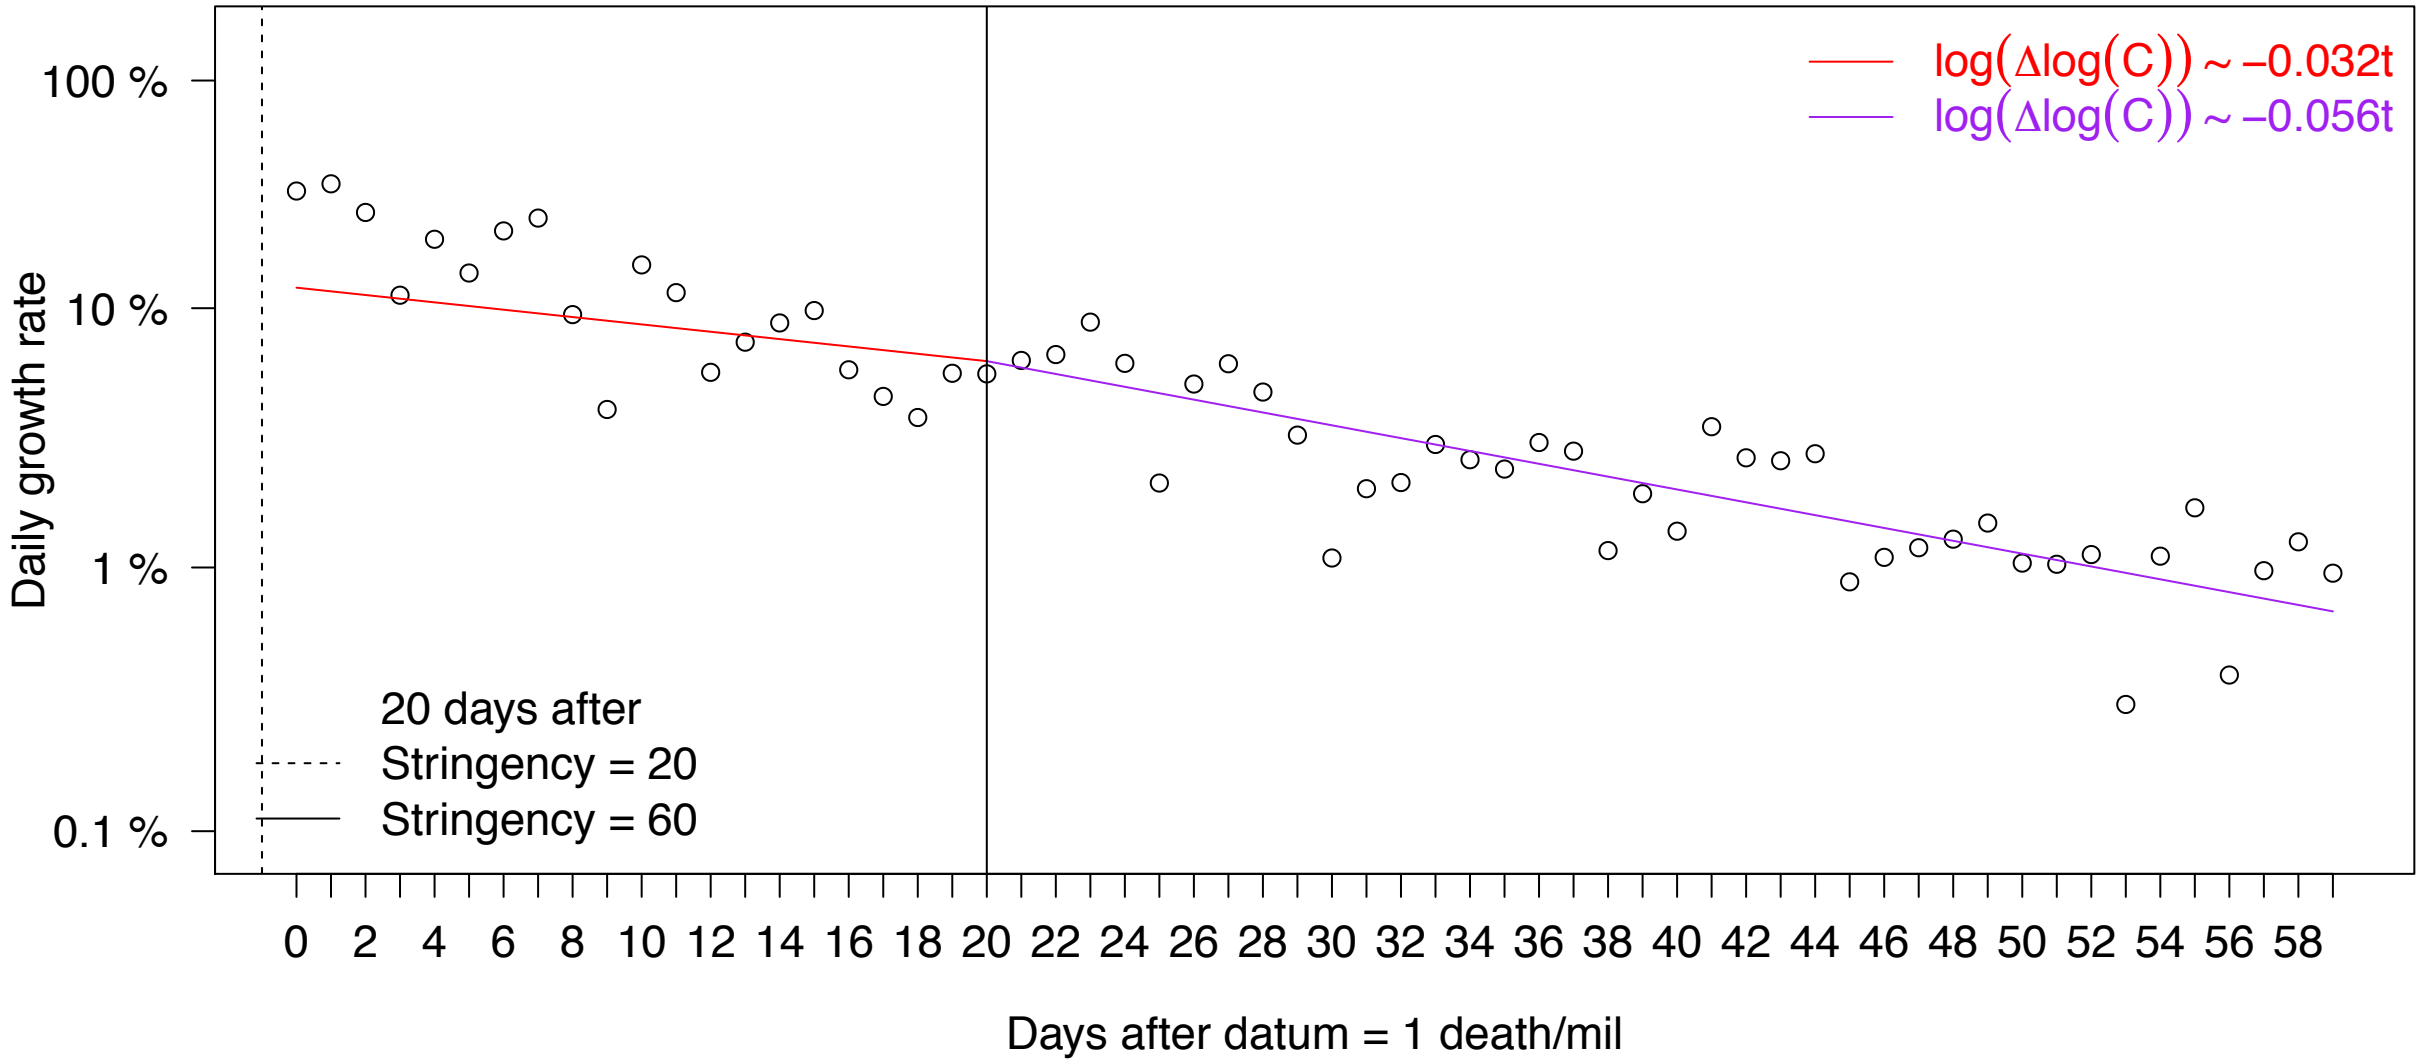

# Portugal

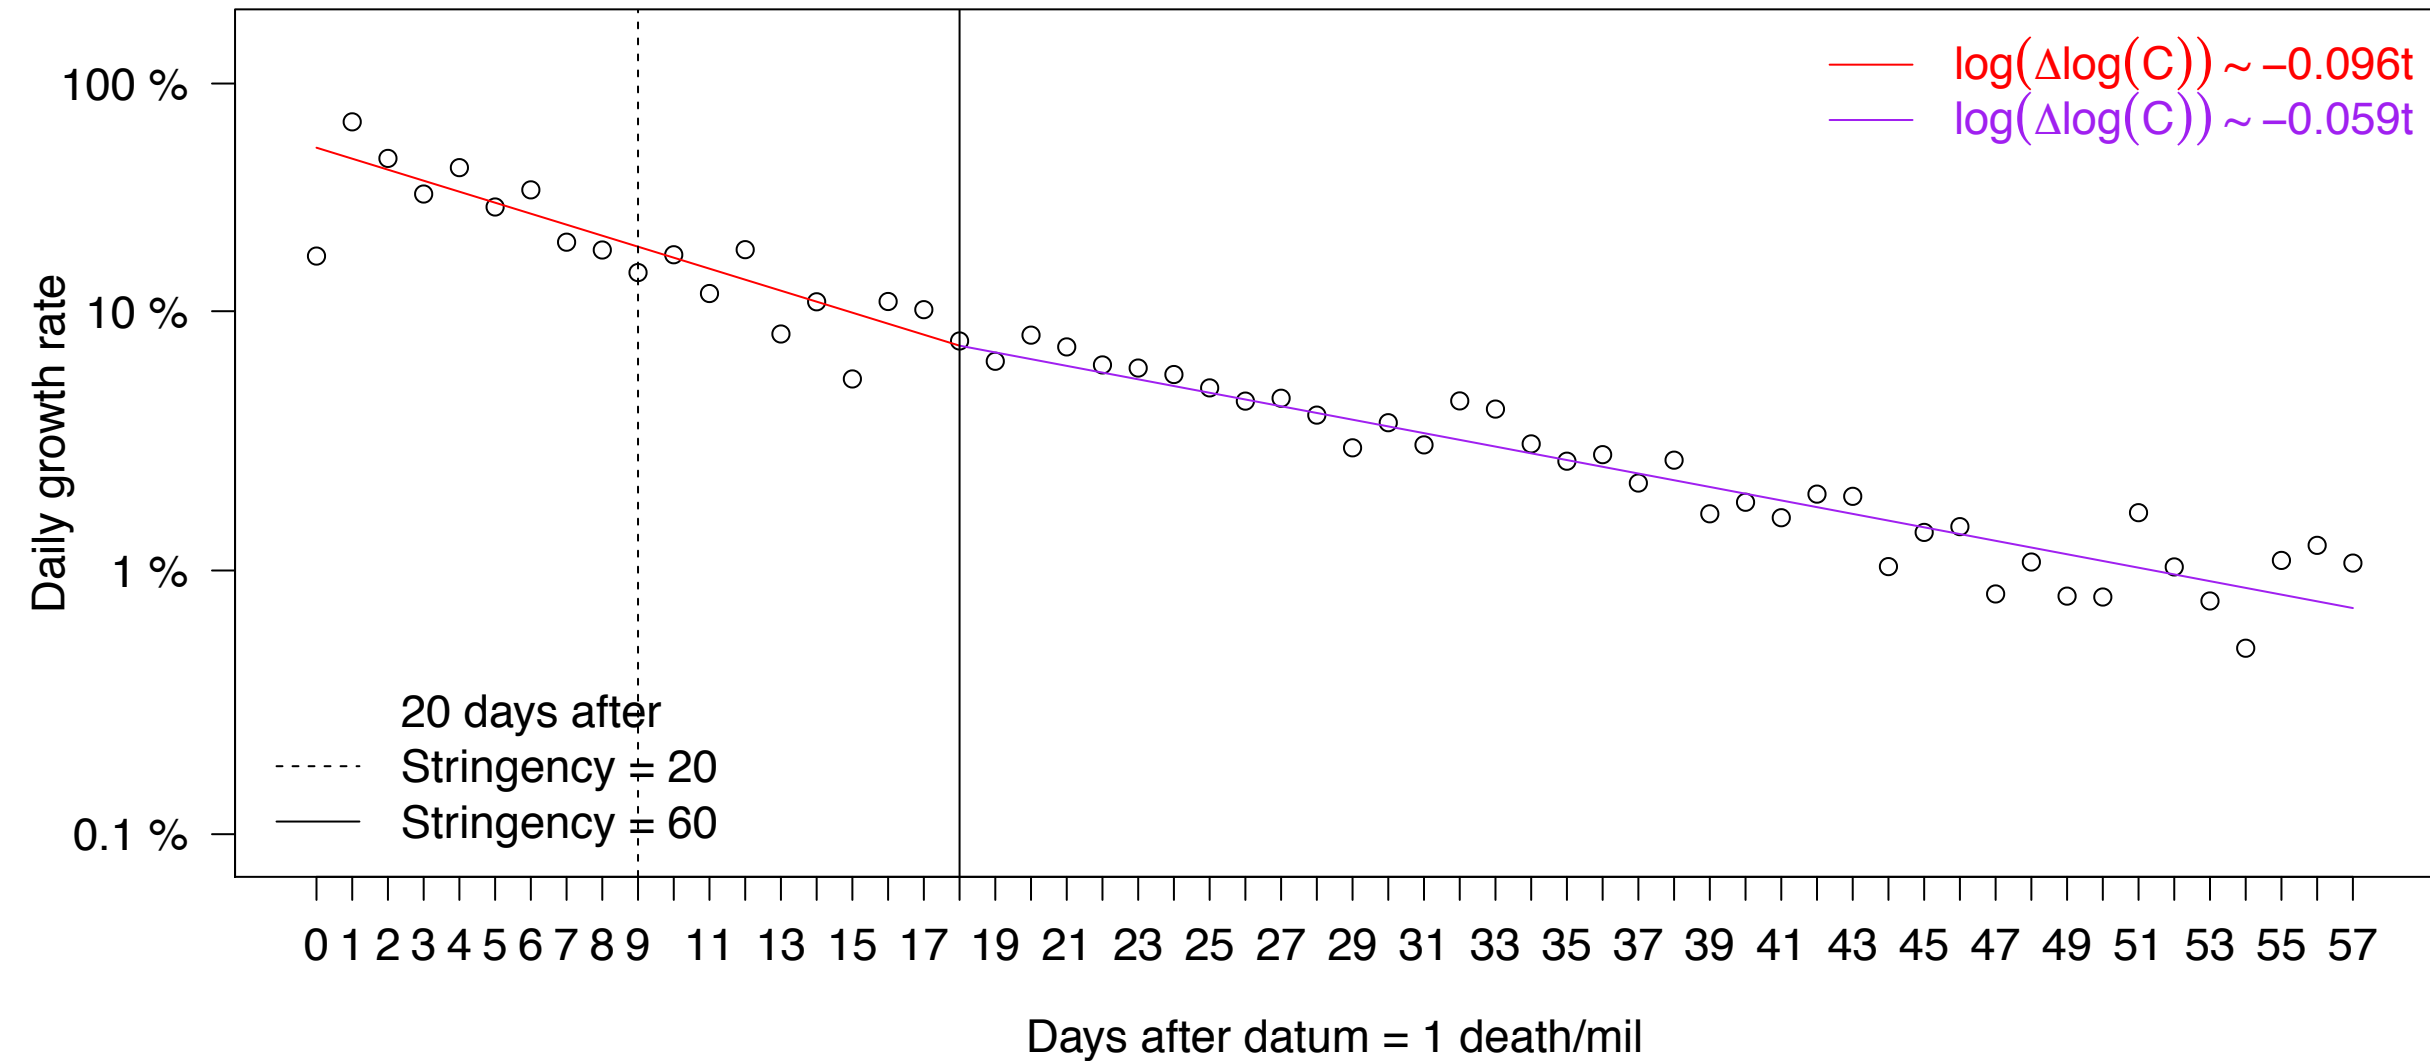

# Romania

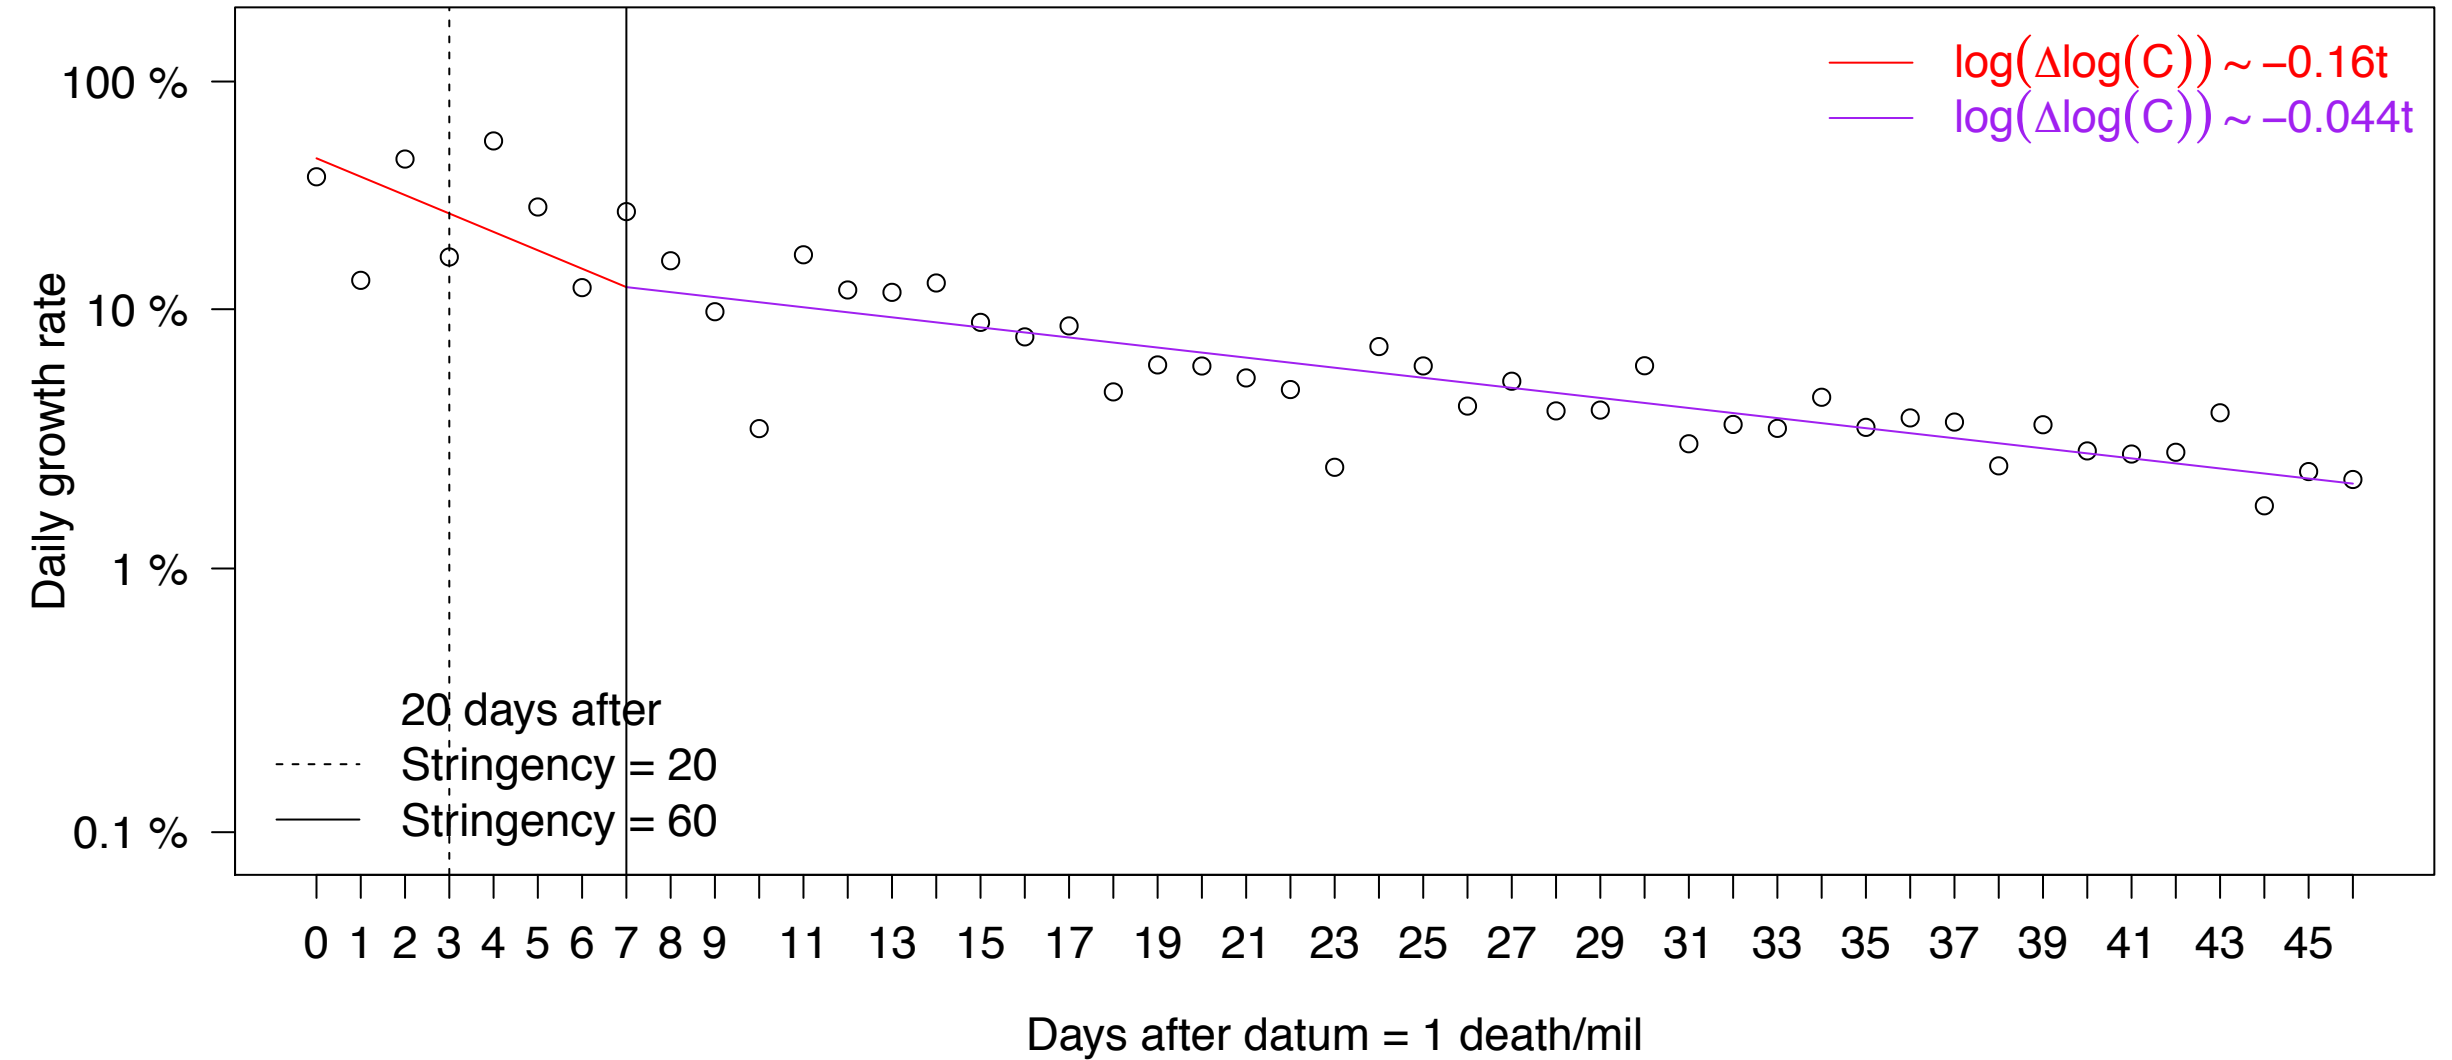



# Russia

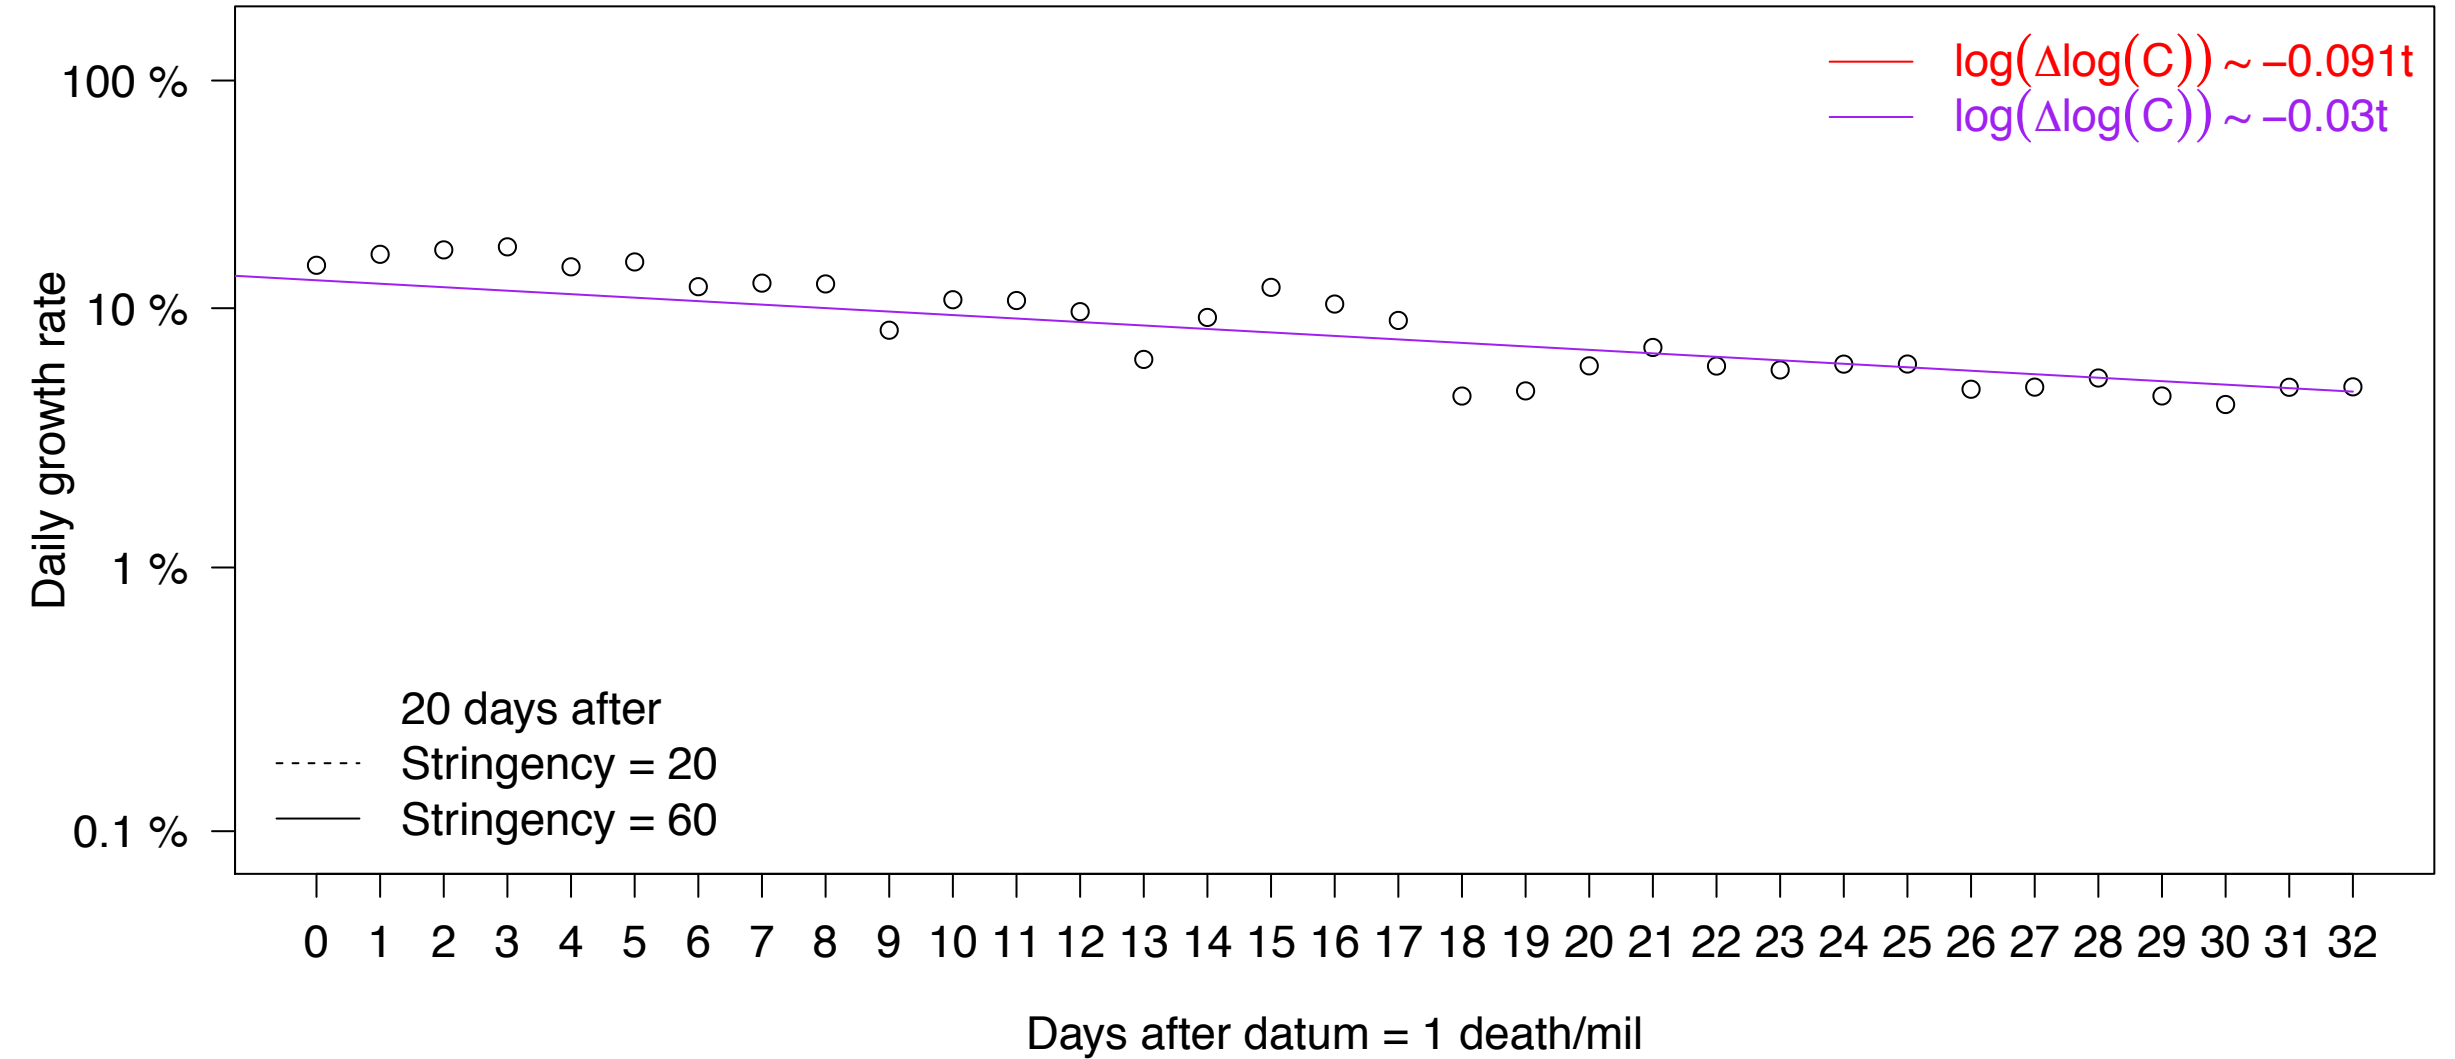

# Serbia

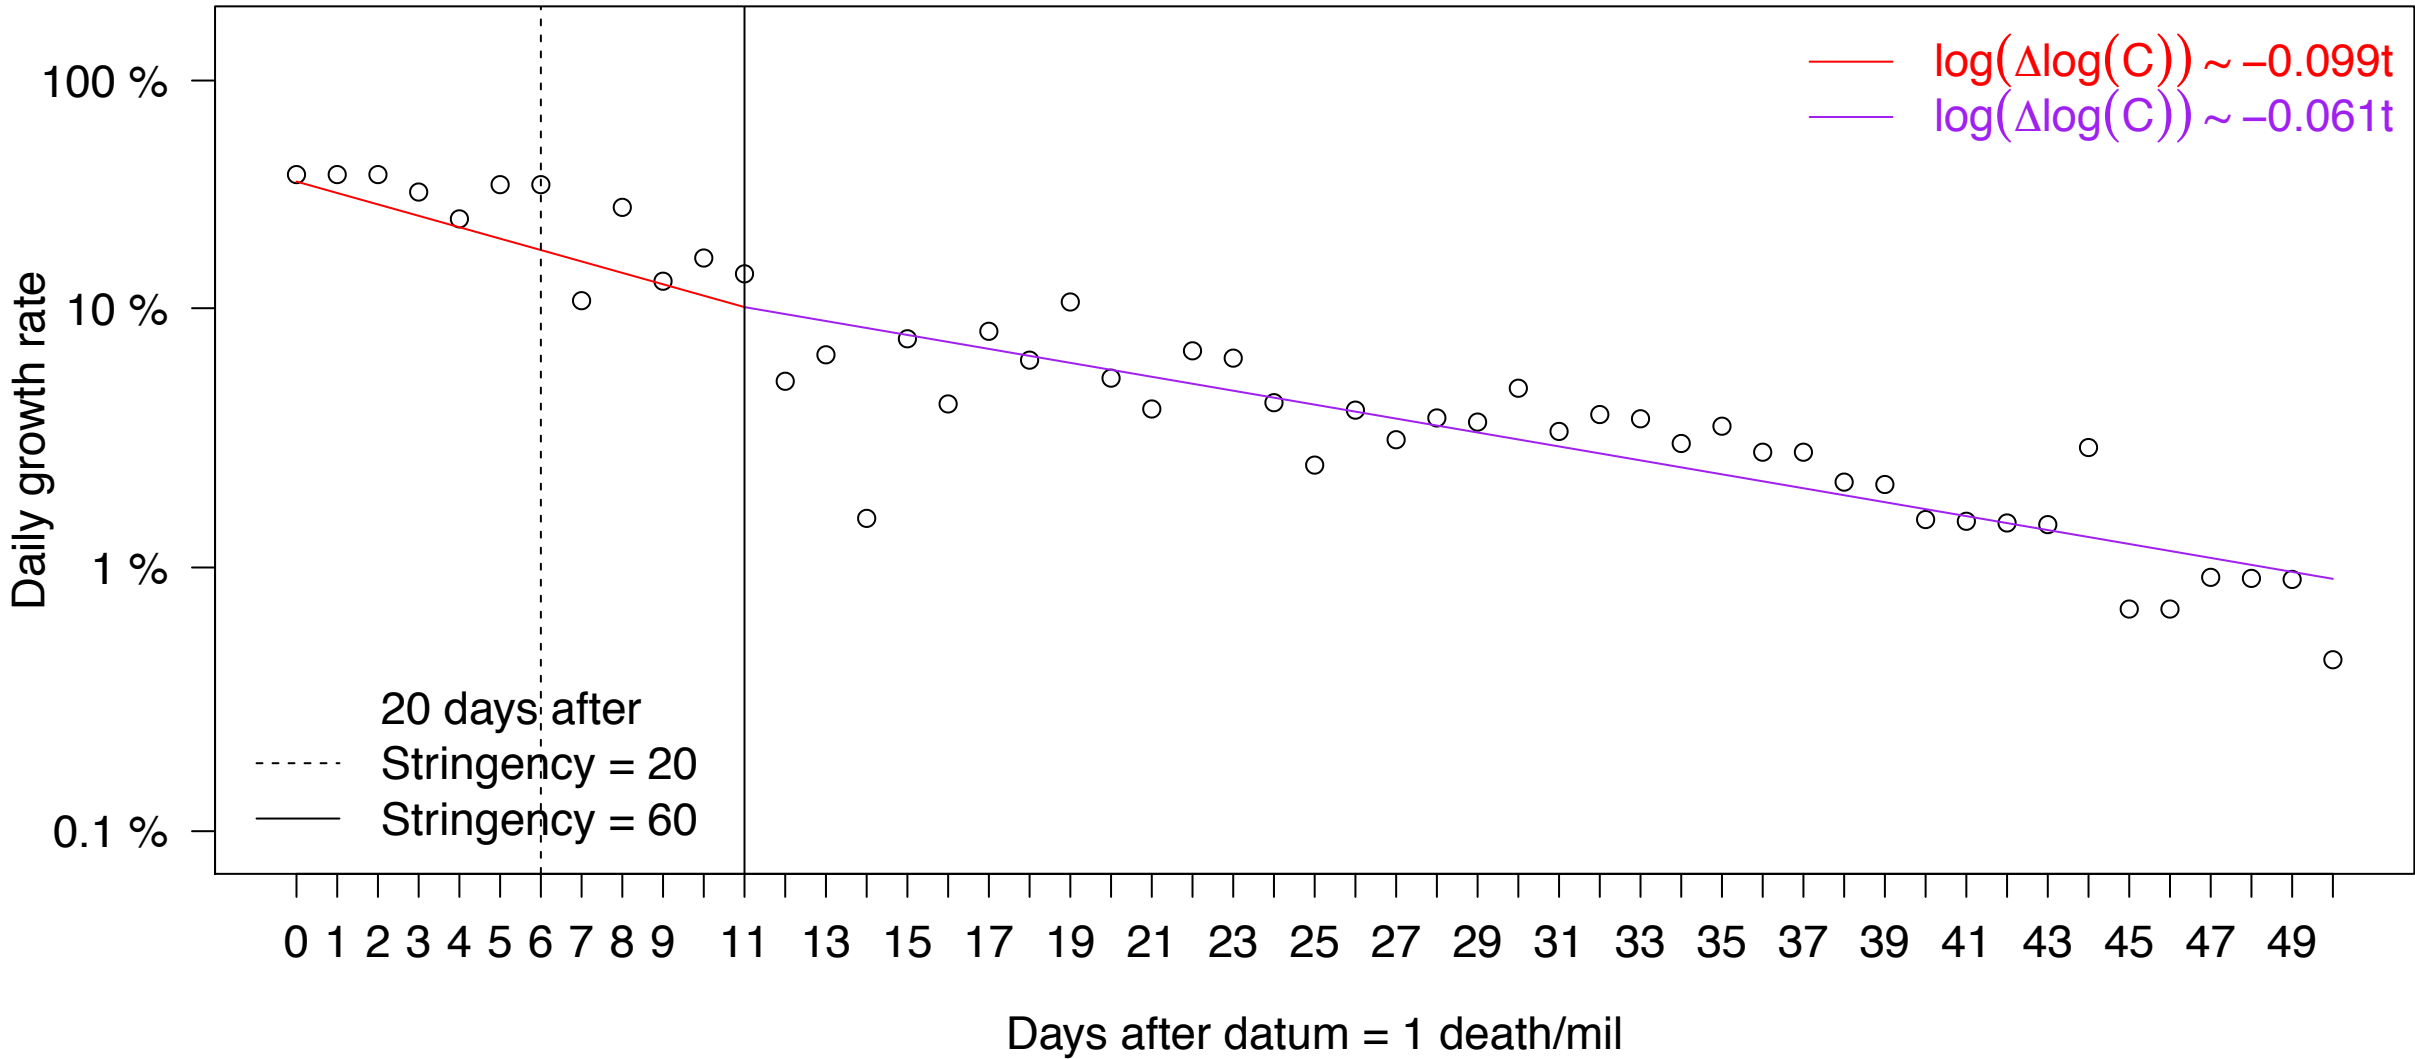

# Slovenia

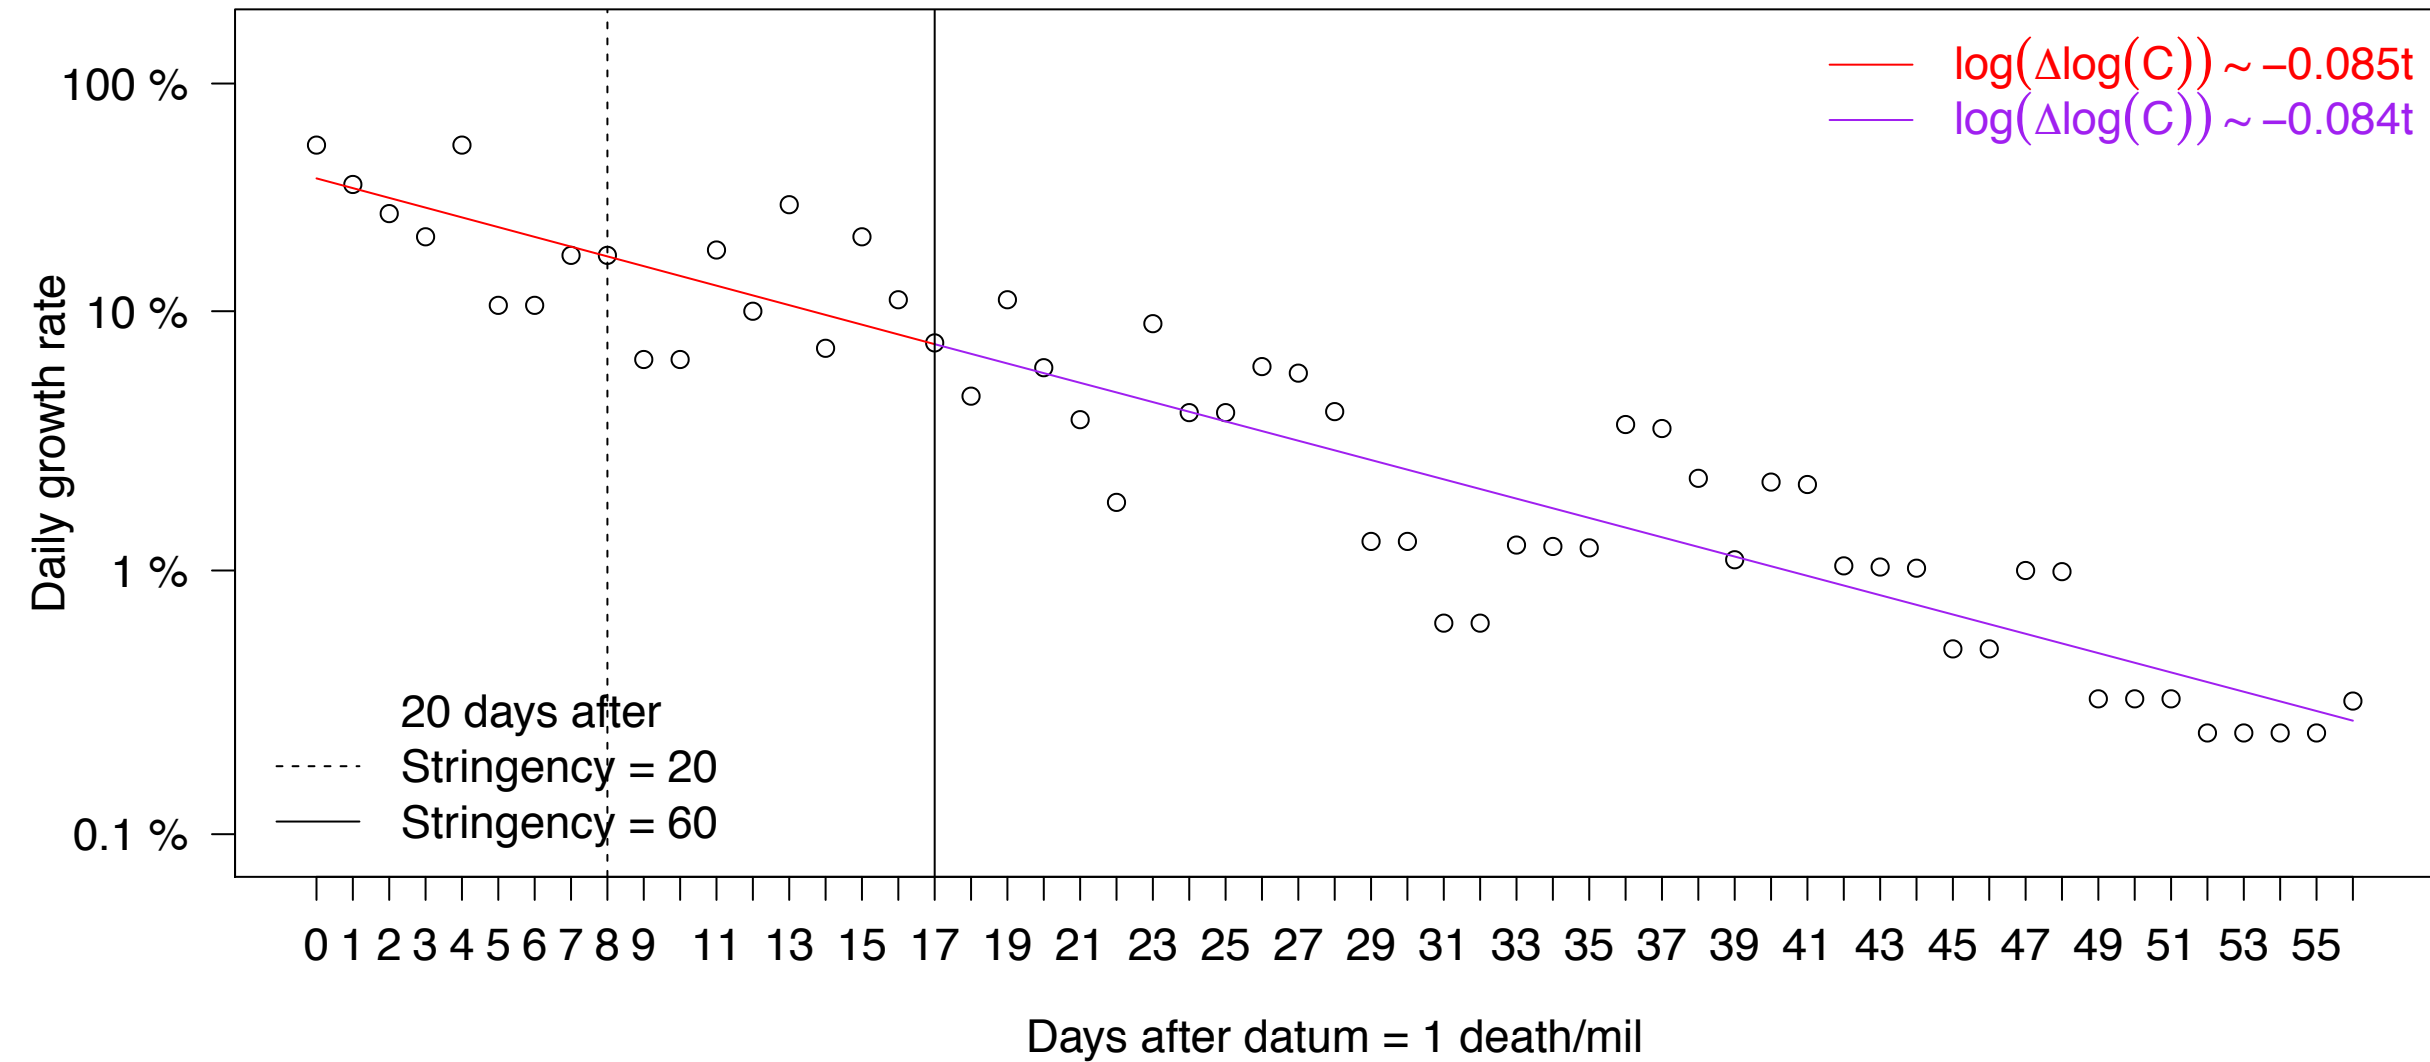

# Spain

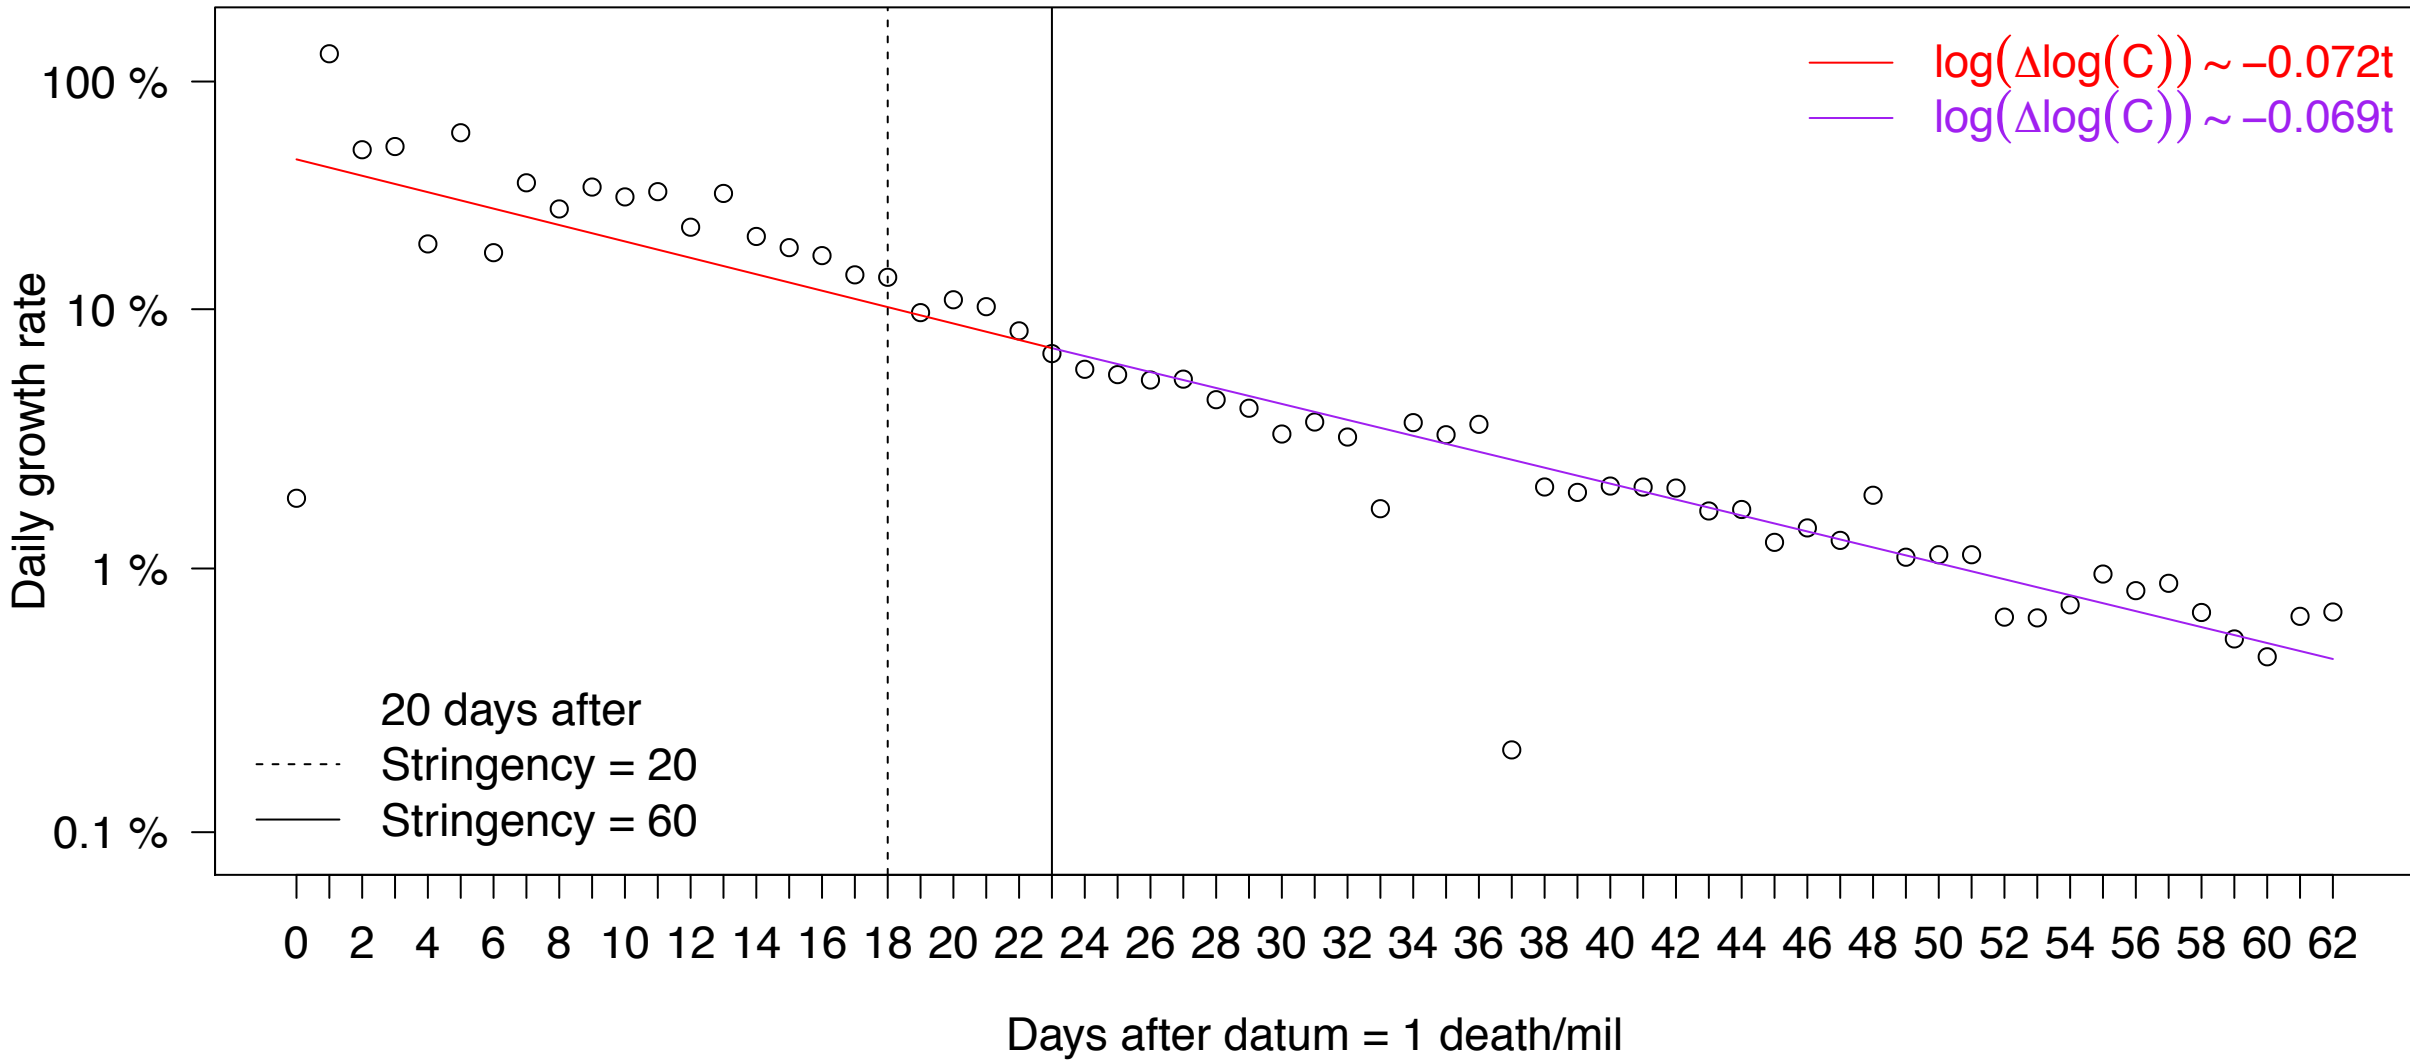

# Sweden

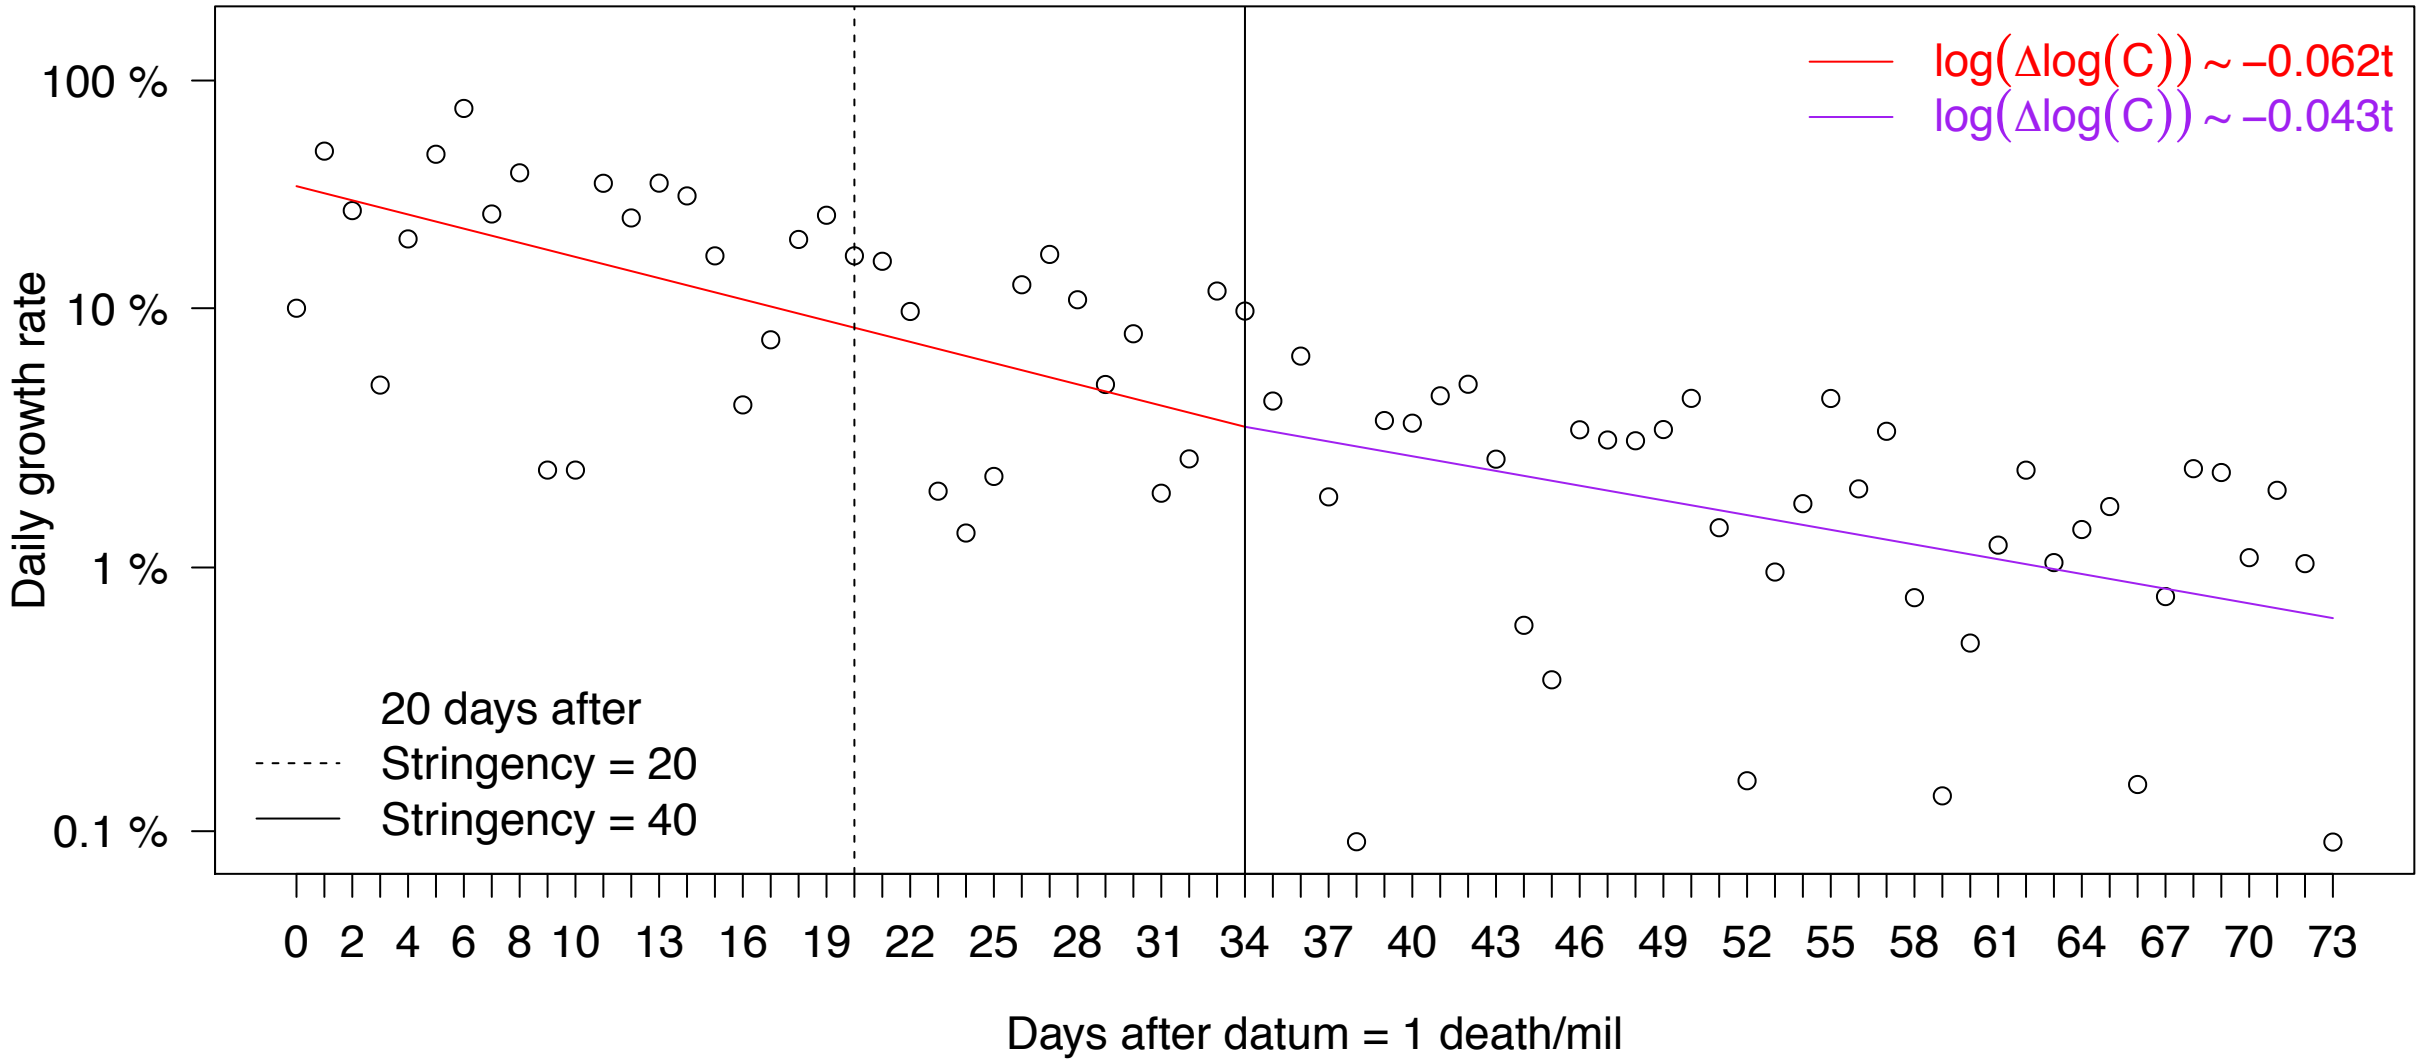

# Switzerland

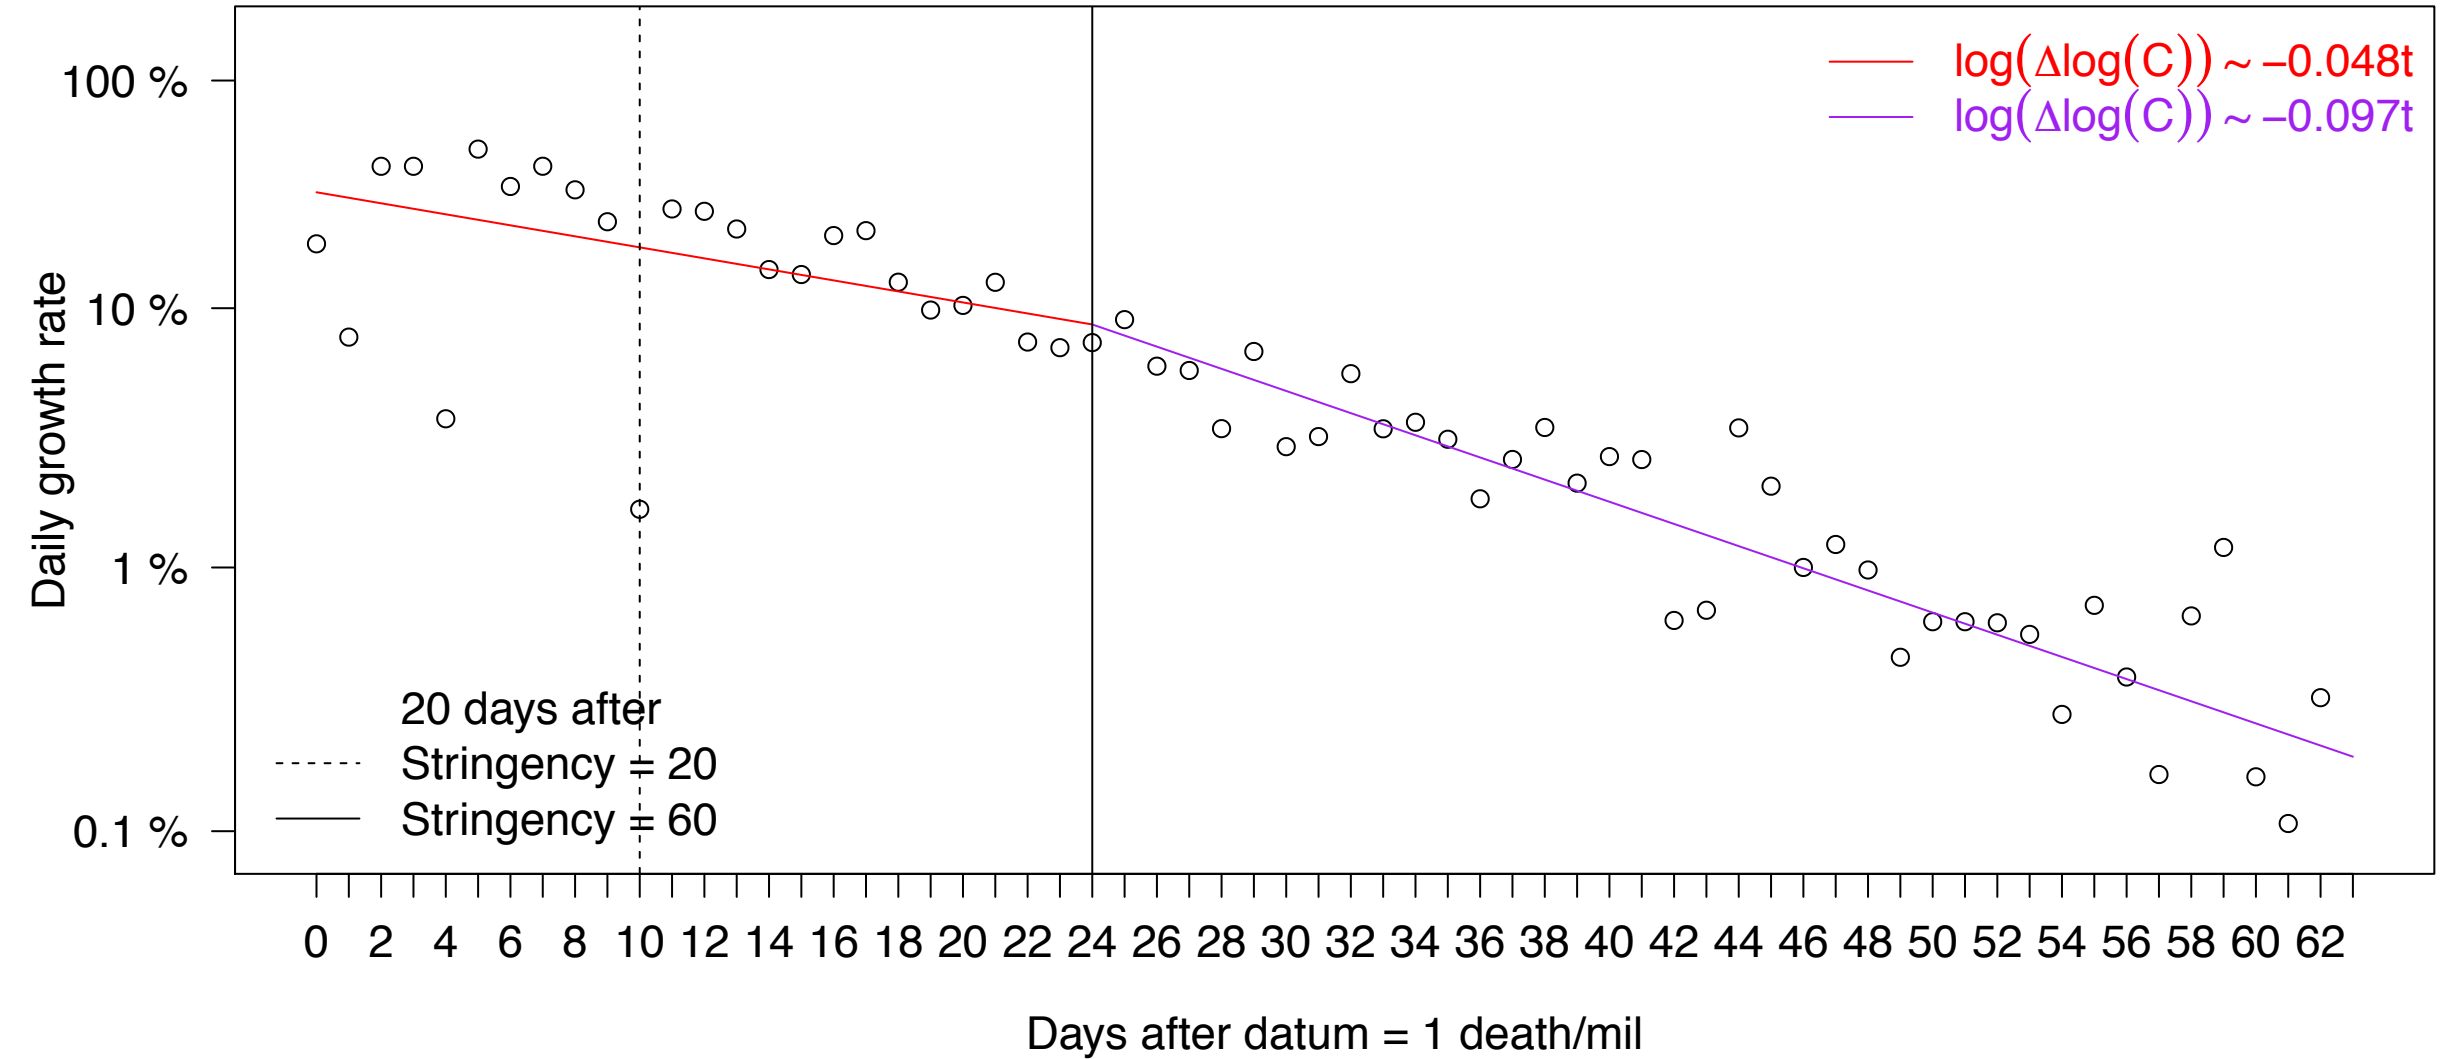

# Ukraine

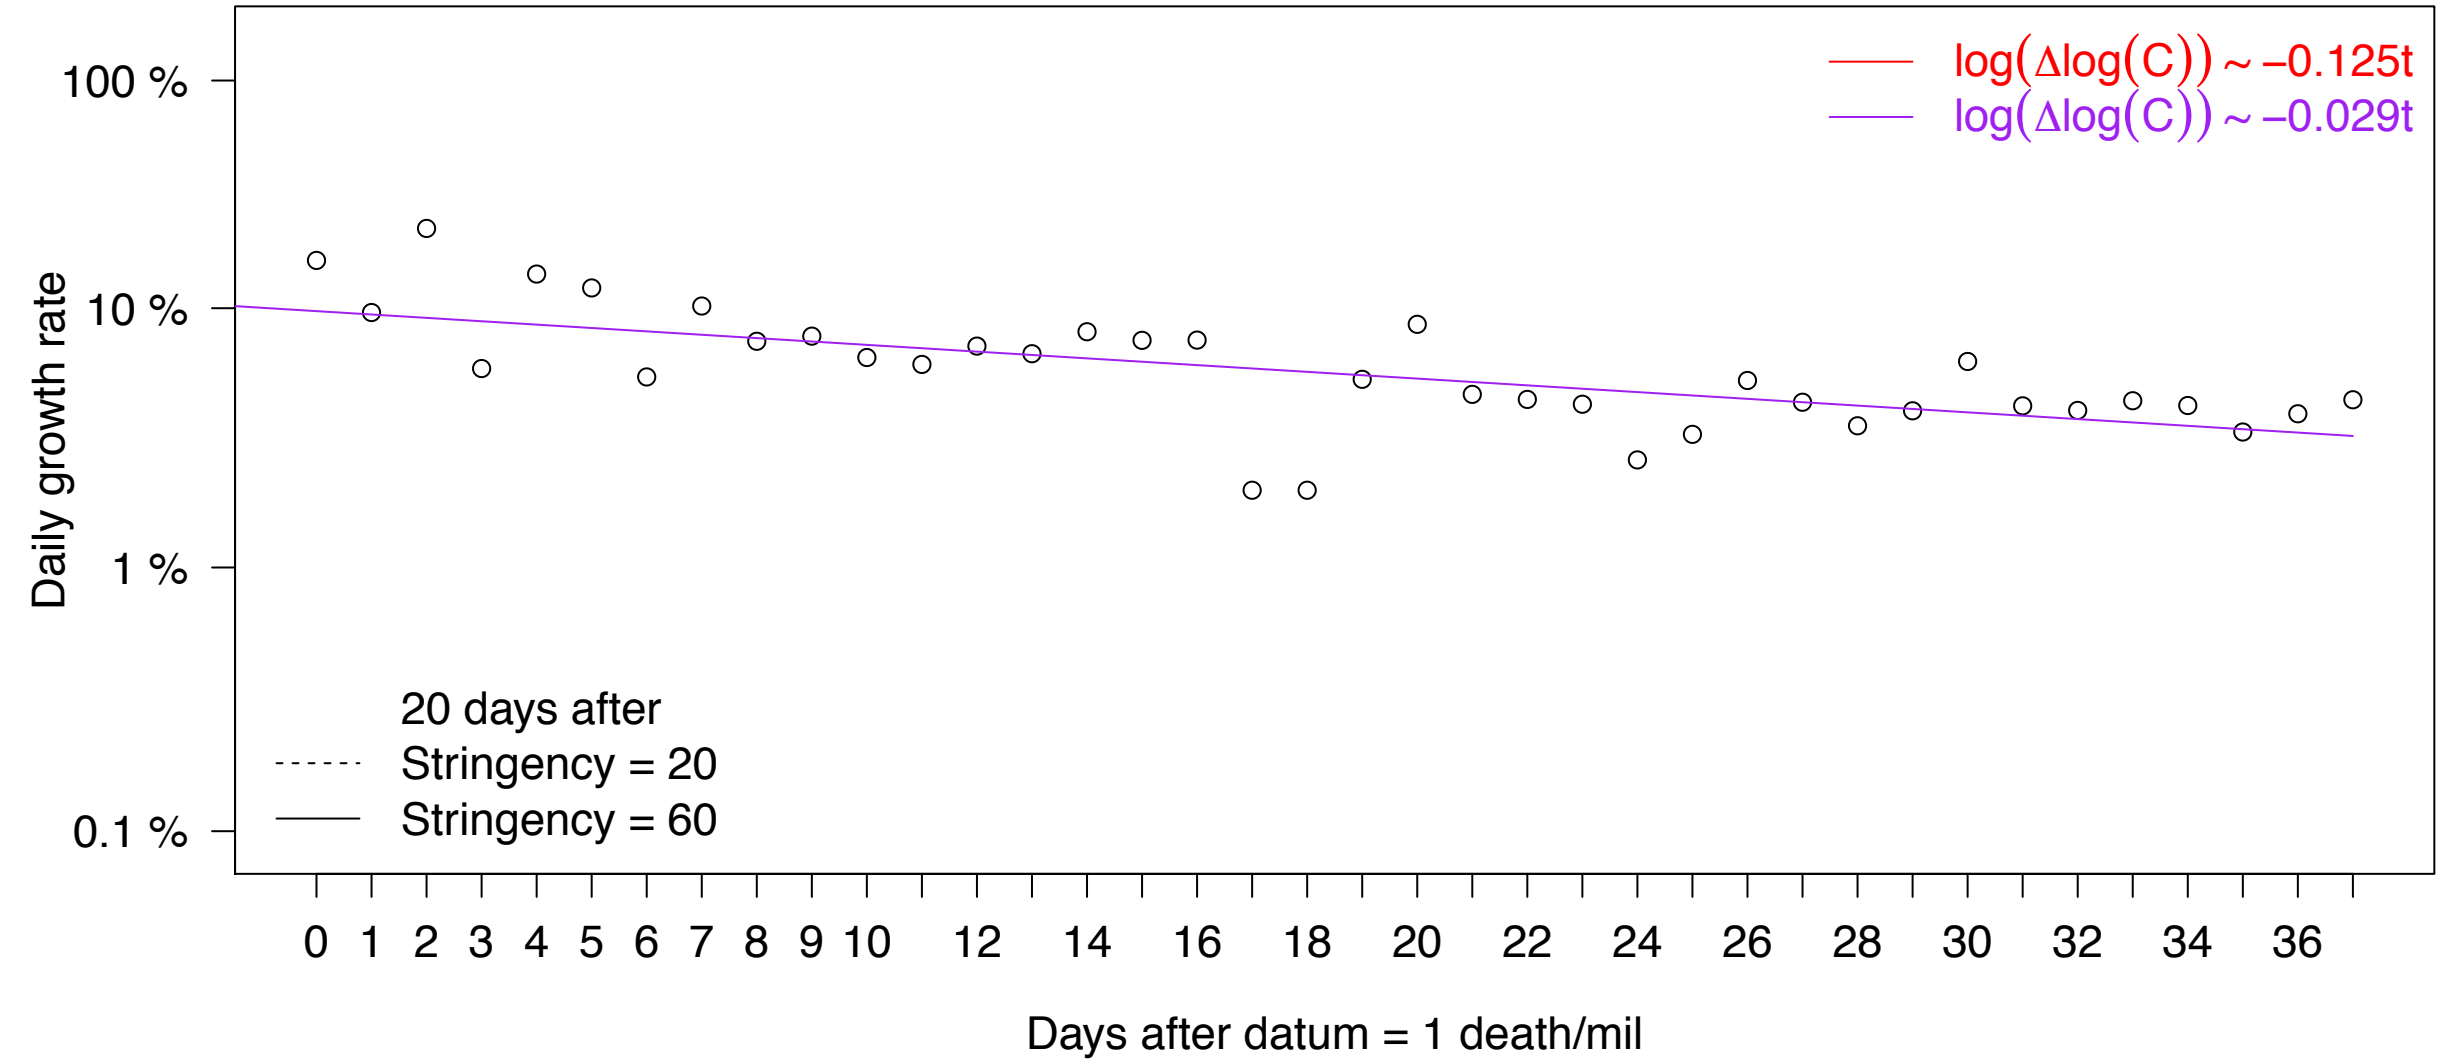

# United Kingdom

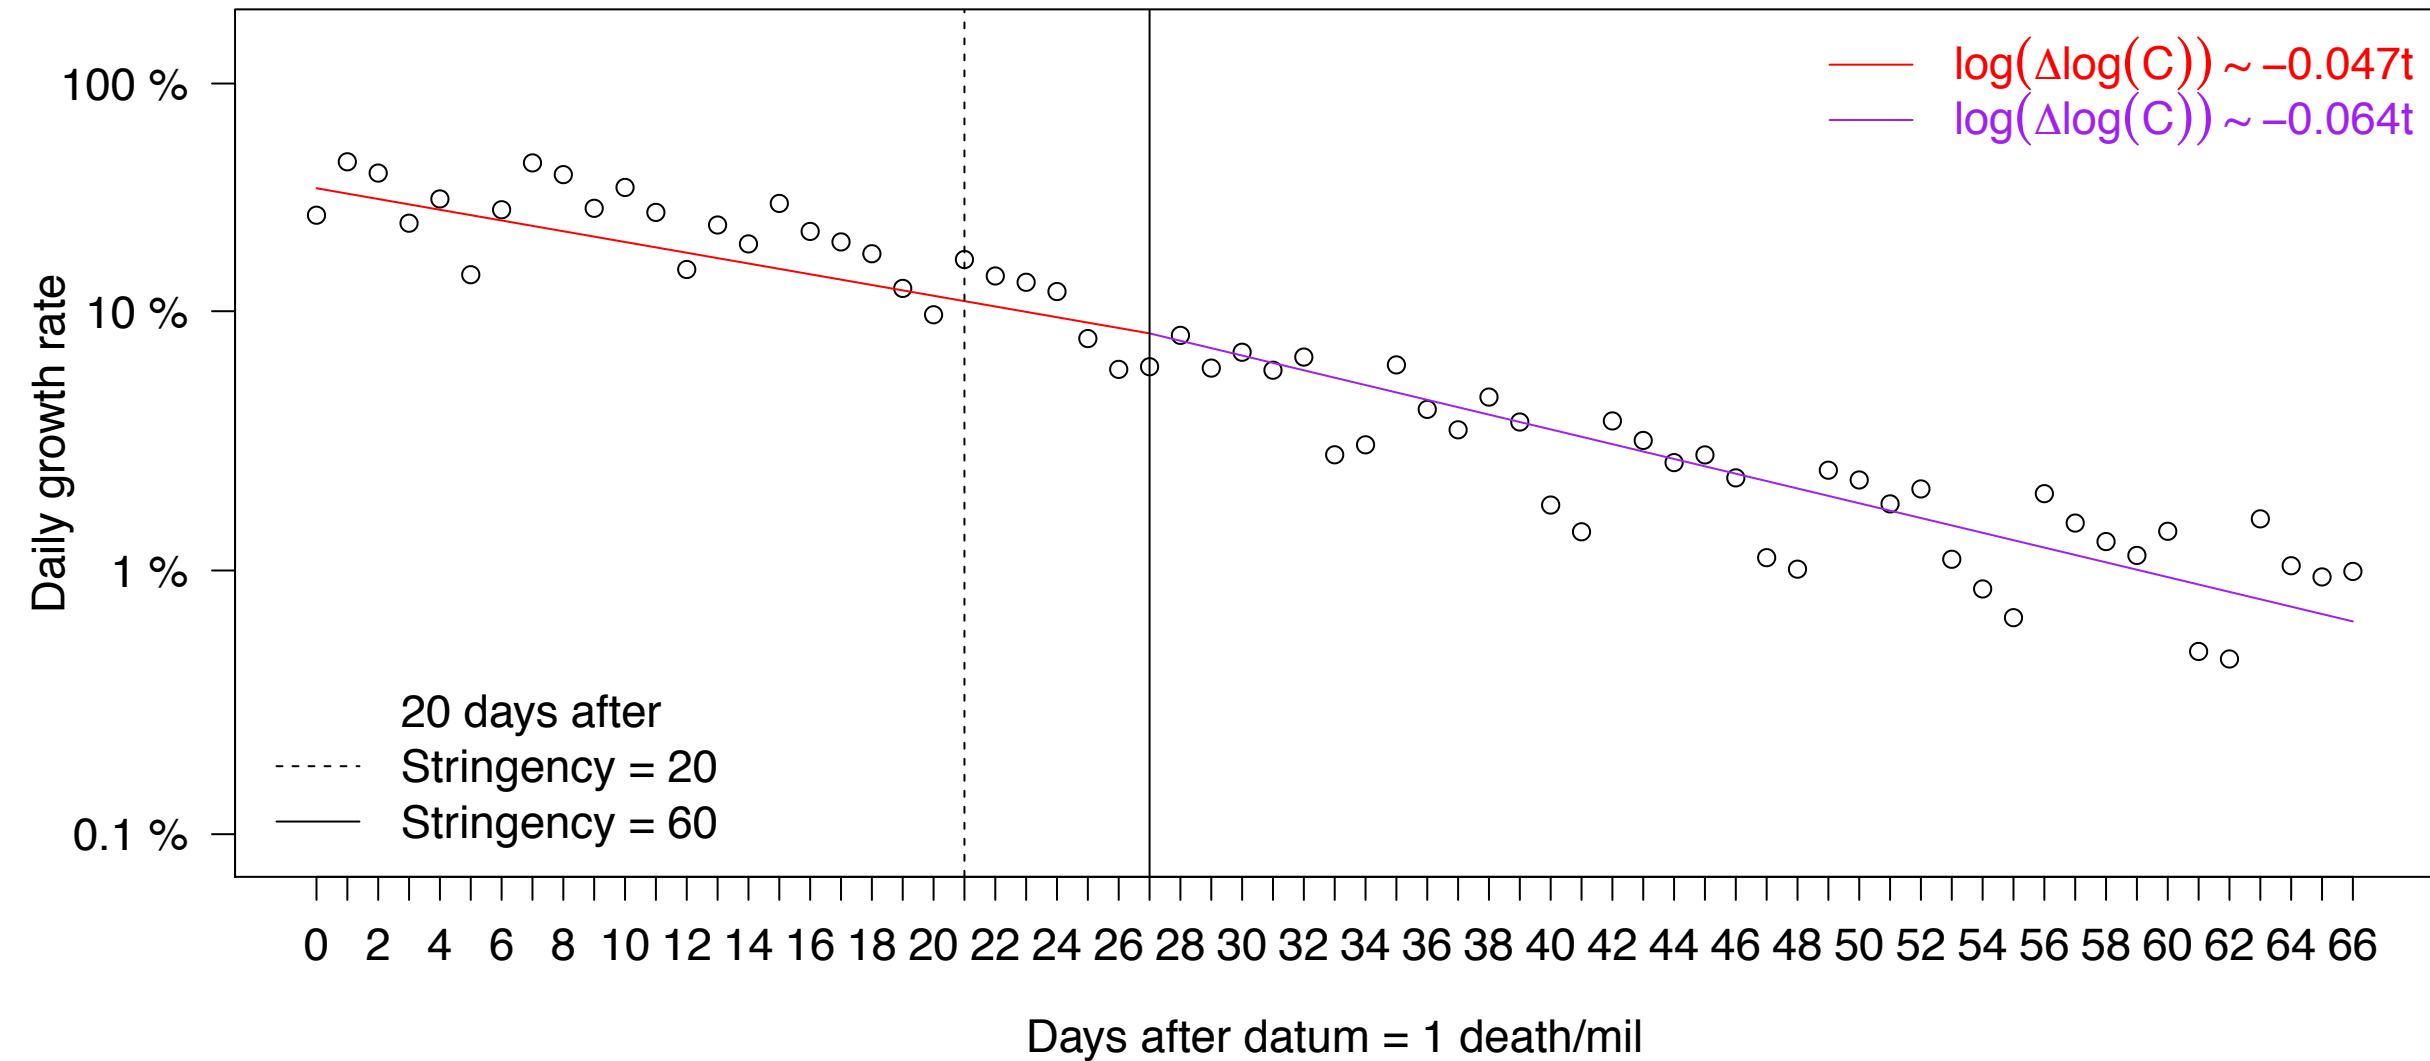



# United States

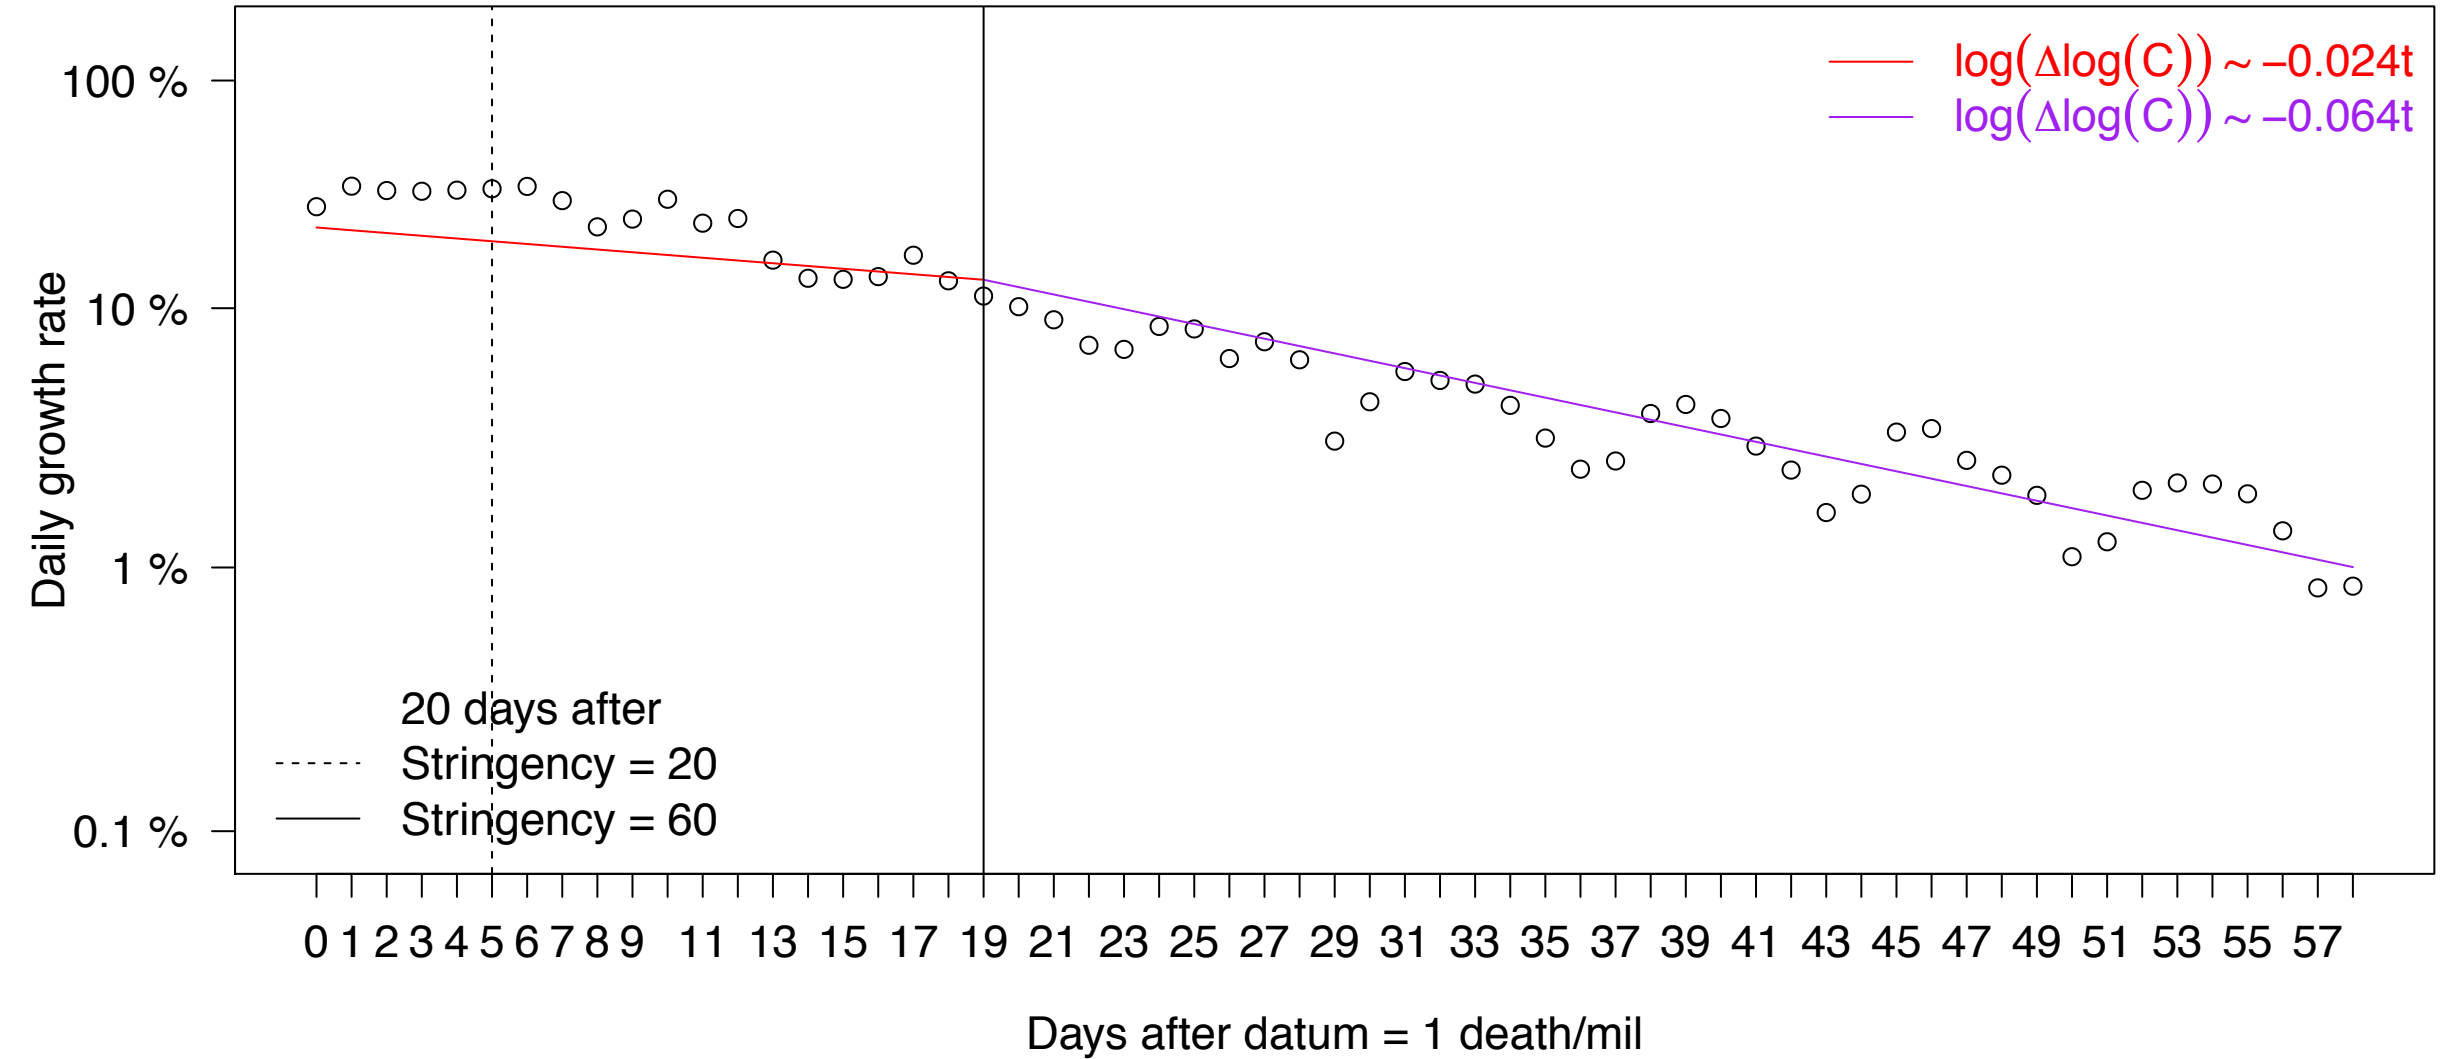

Supplement: 11071_2020_5966_MOESM1_ESM.pdf [file 11071_2020_5966_MOESM1_ESM.pdf]
