# Supplementary material for: Interpreting, analysing and modelling COVID-19 mortality data
Source: PubMed Central journal article supplement (PMC7527427; doi:10.1007/s11071-020-05966-z), 2020-10-01

# United States

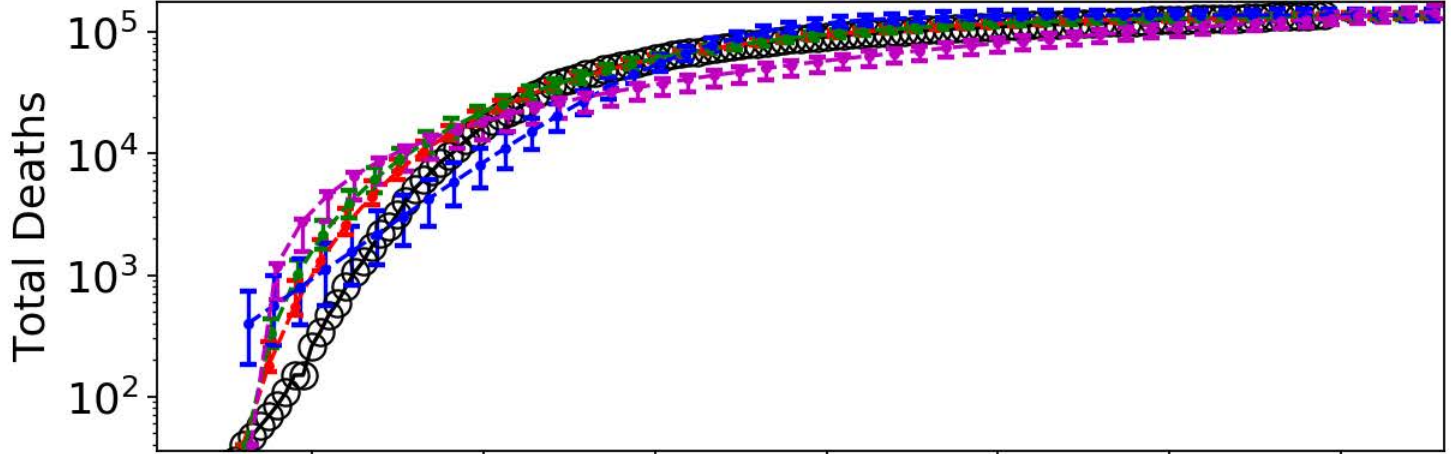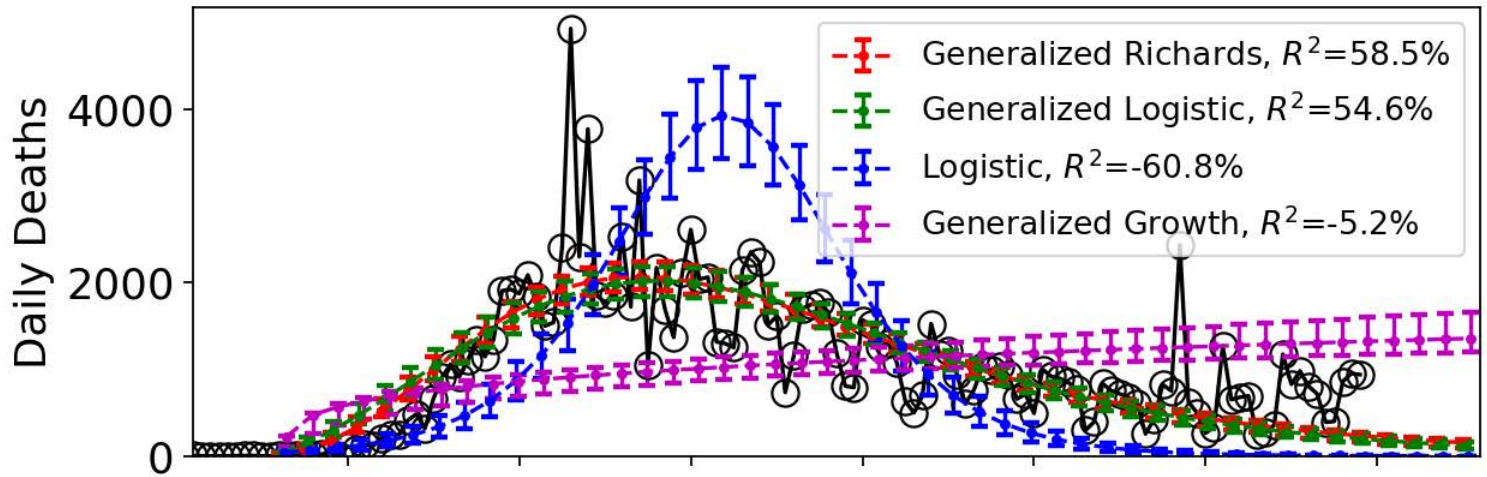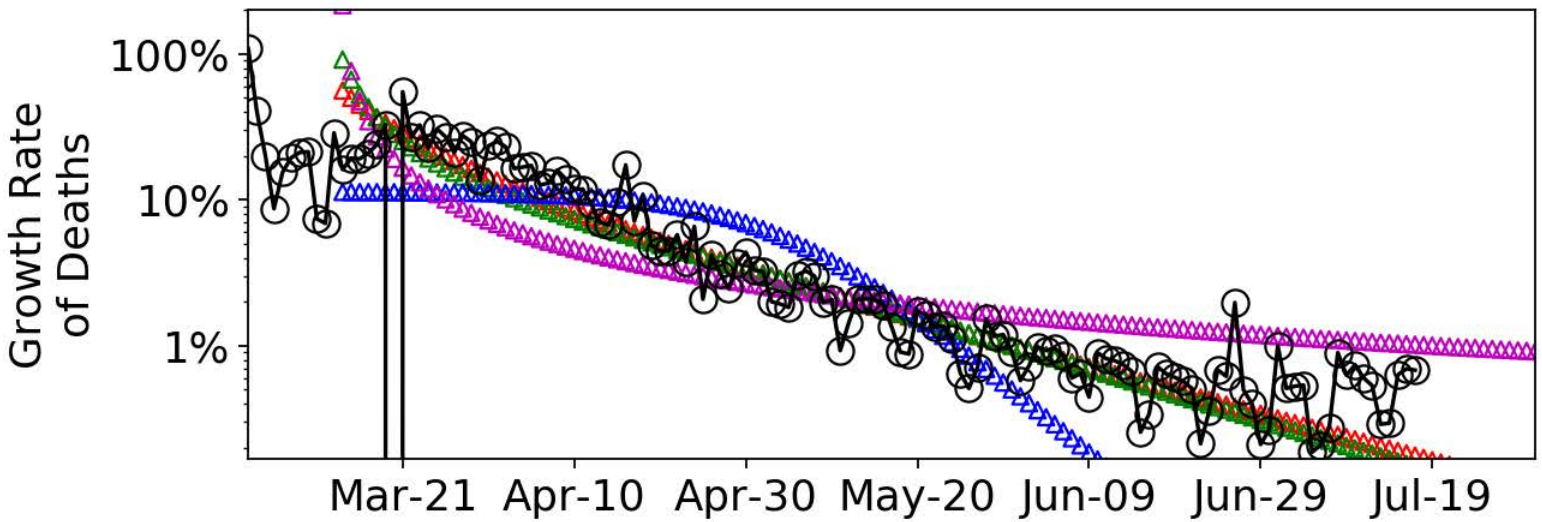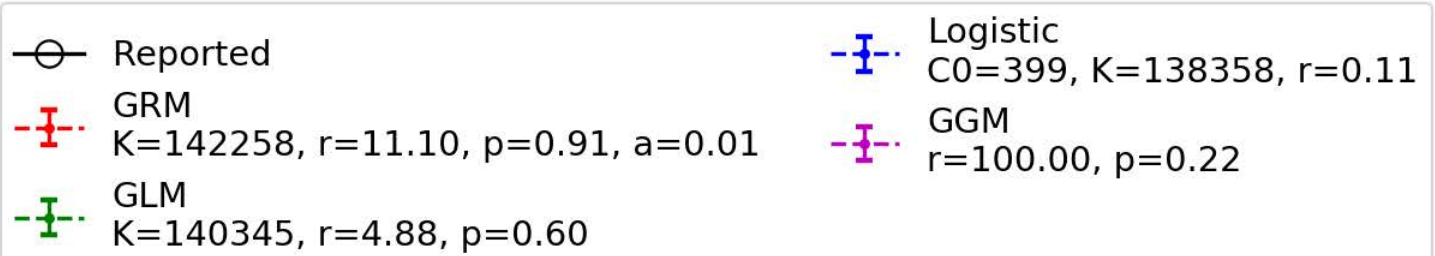

# Europe

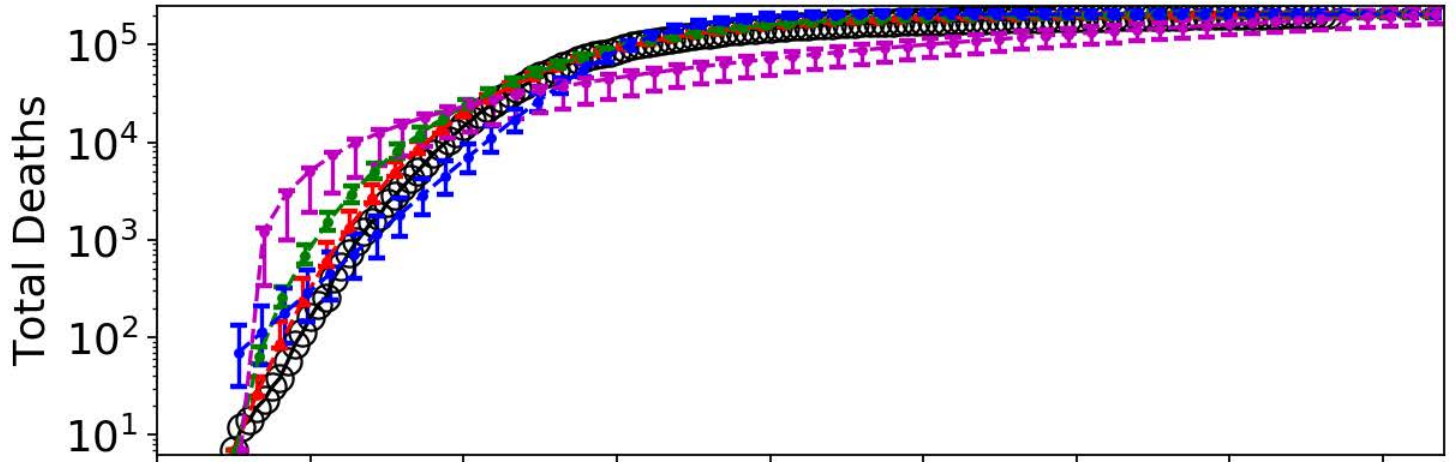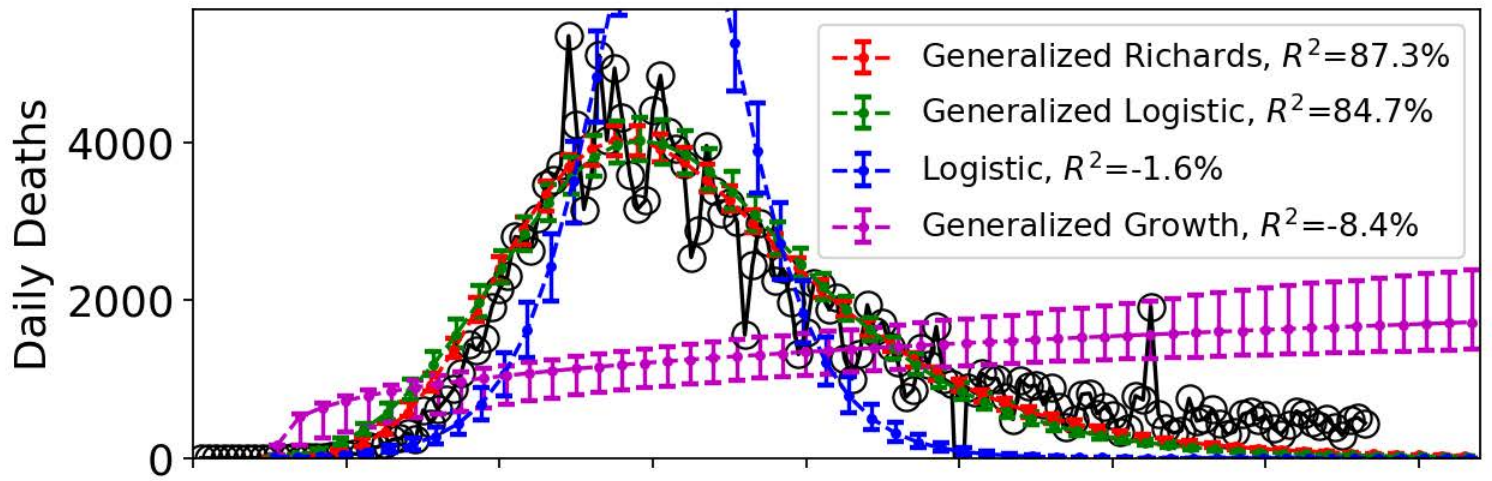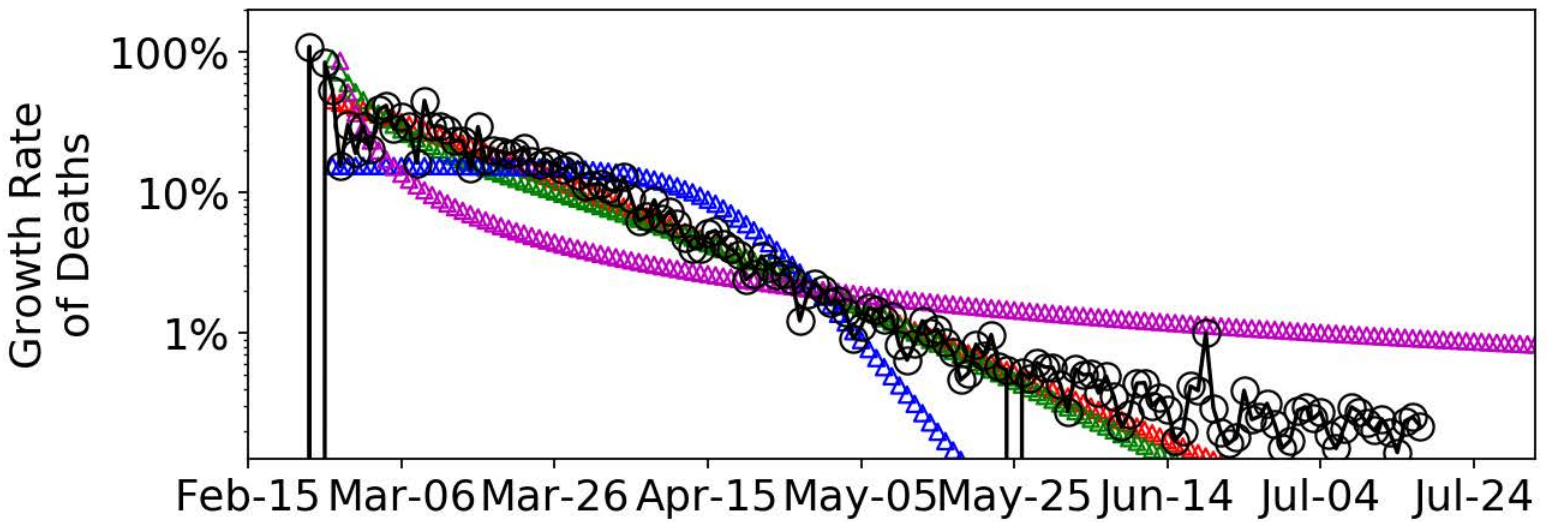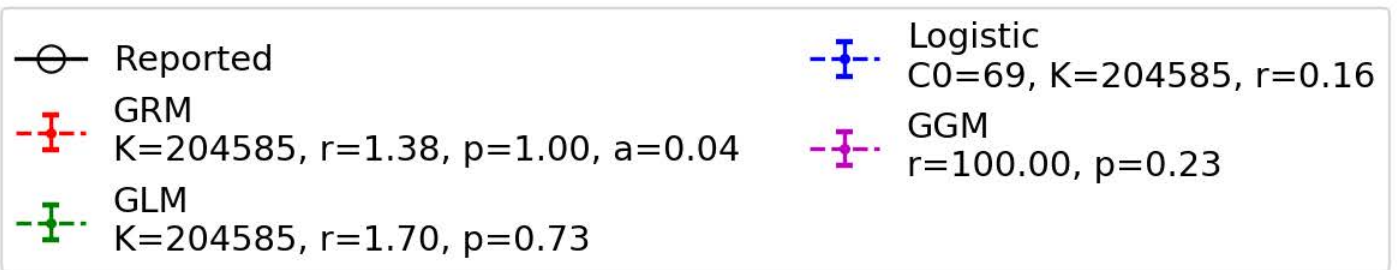



# Brazil

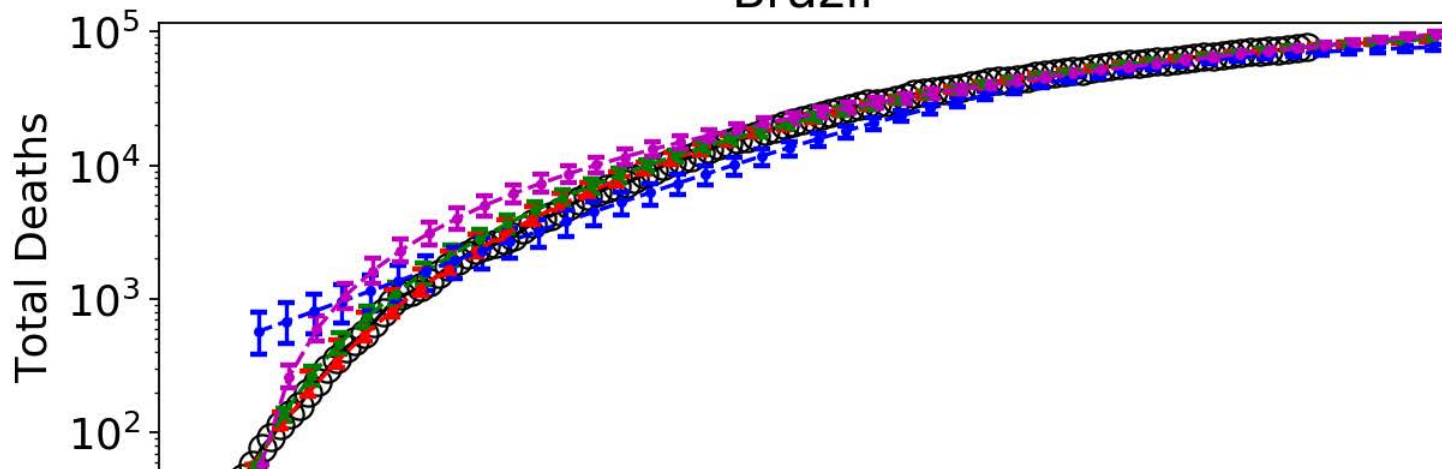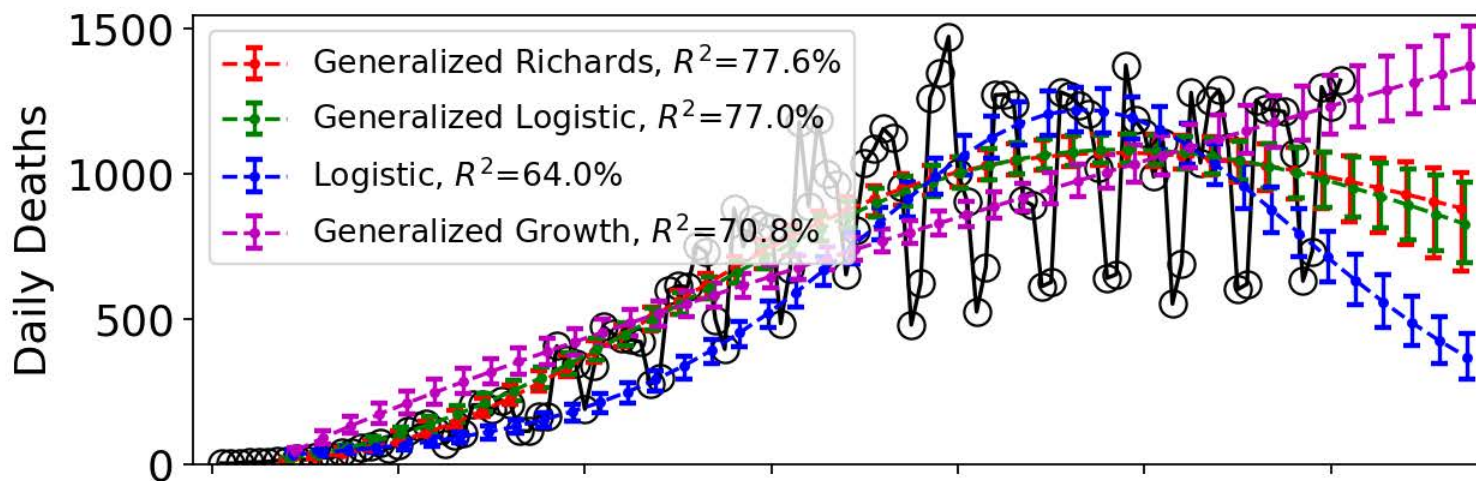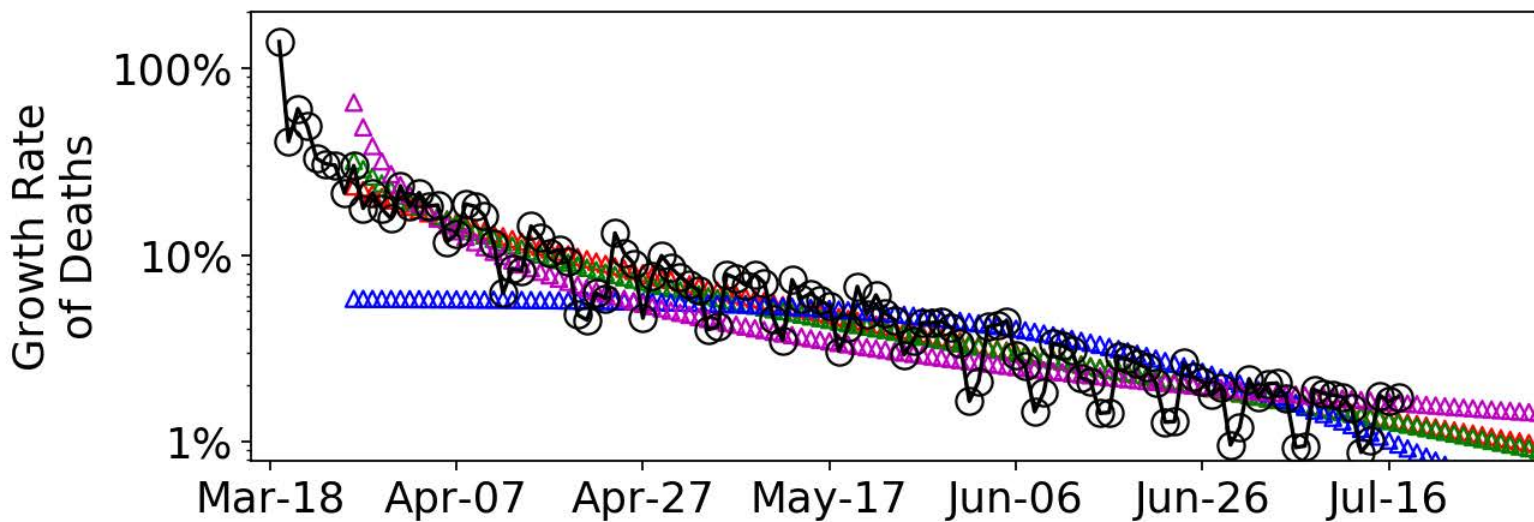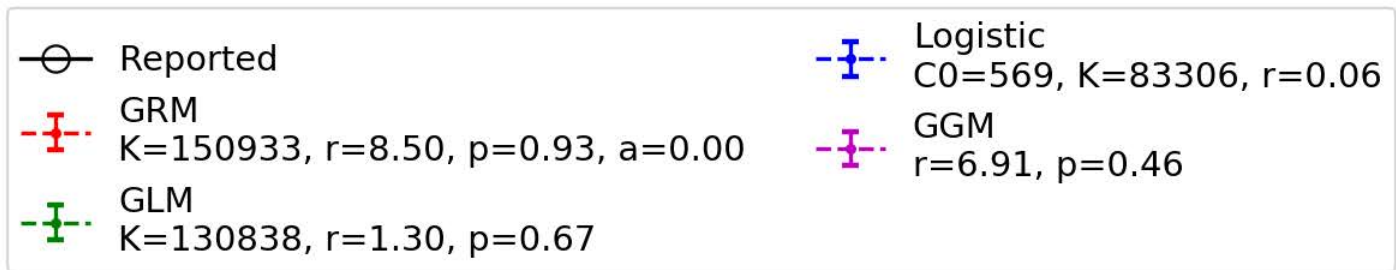

# India

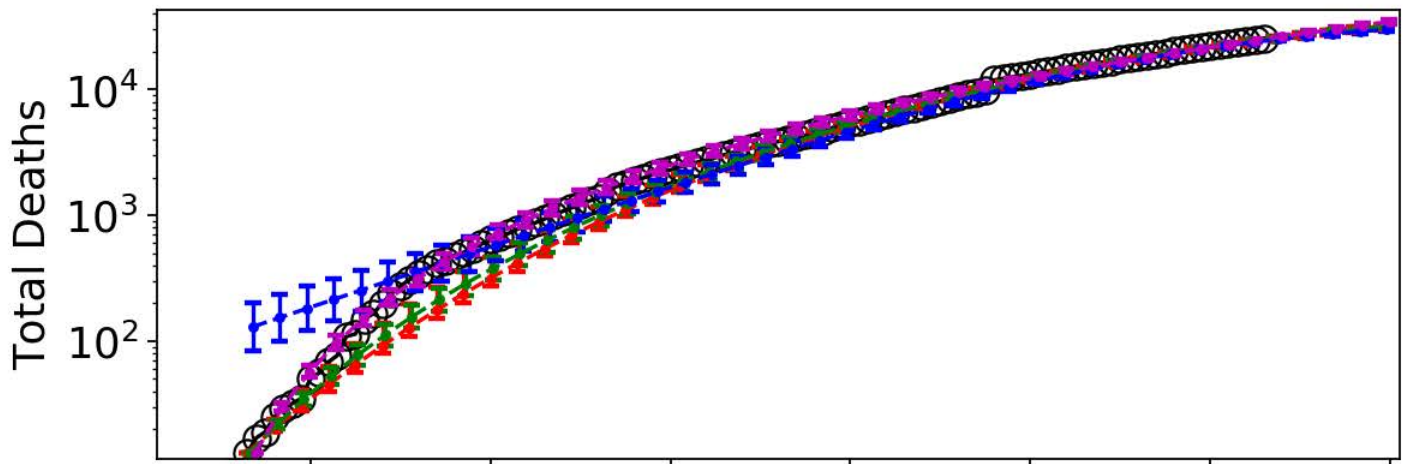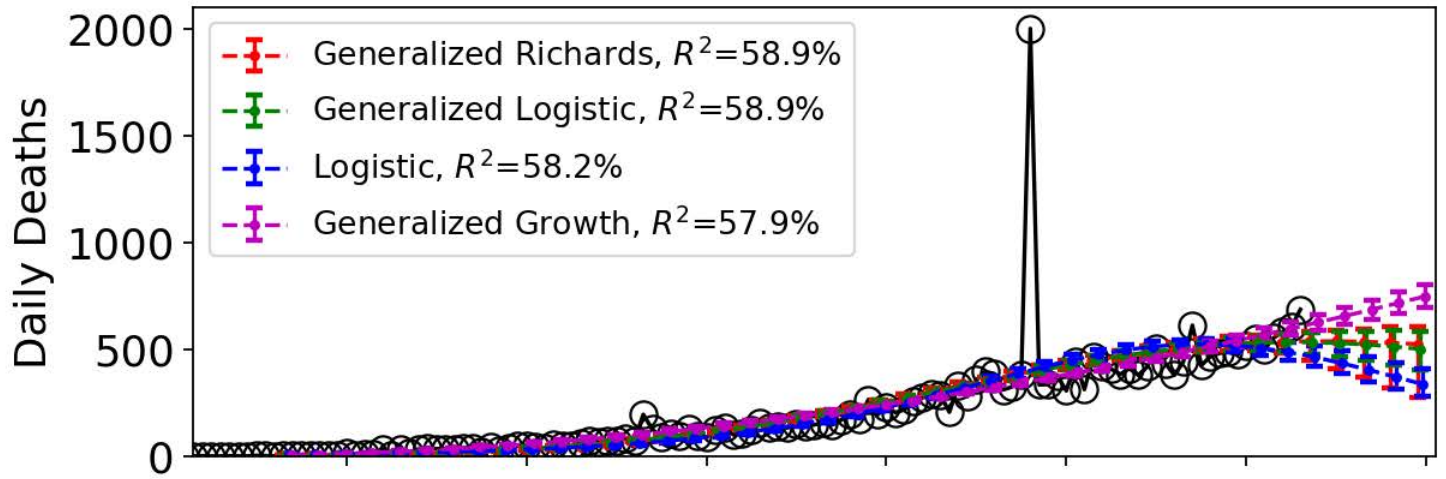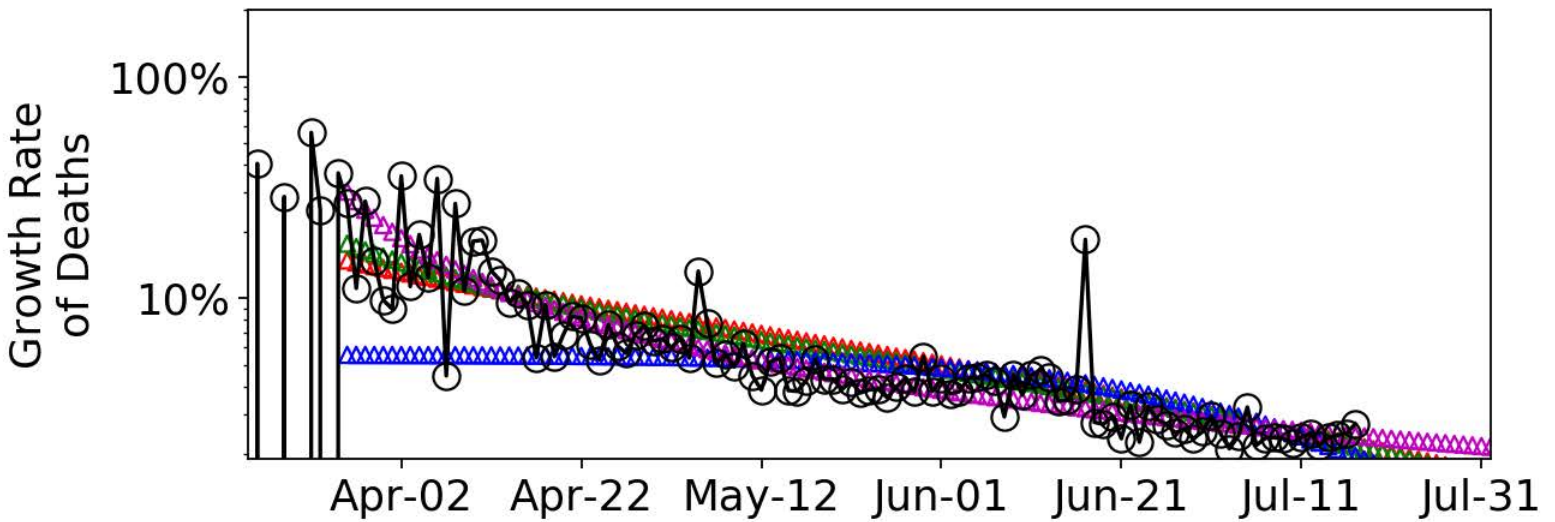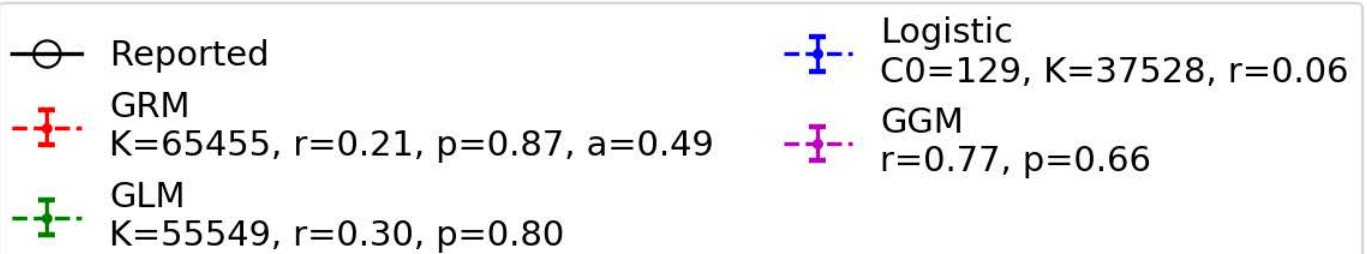

# Russia

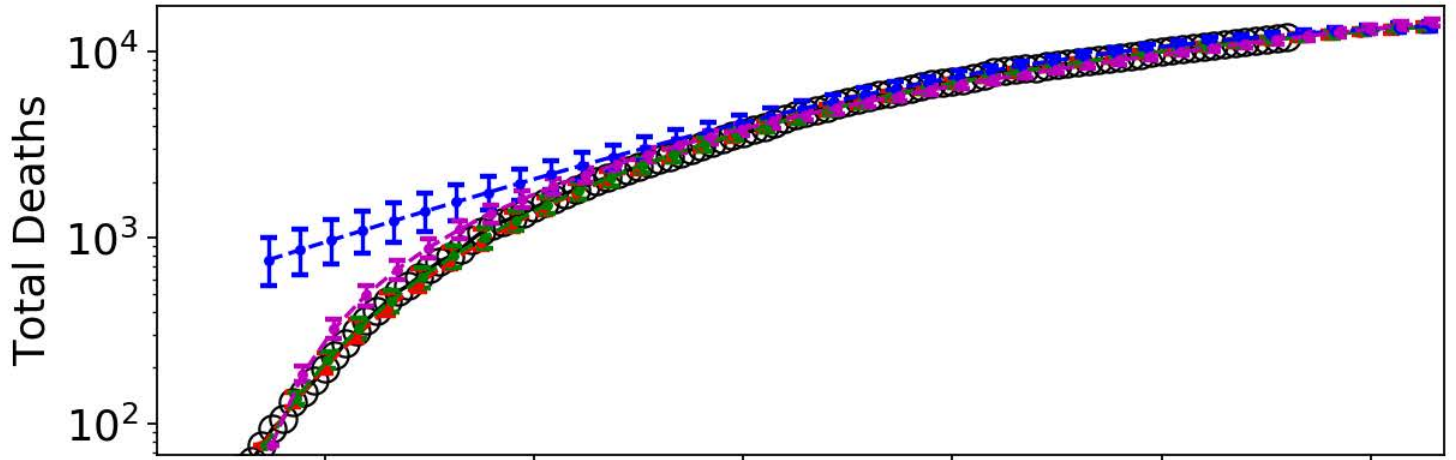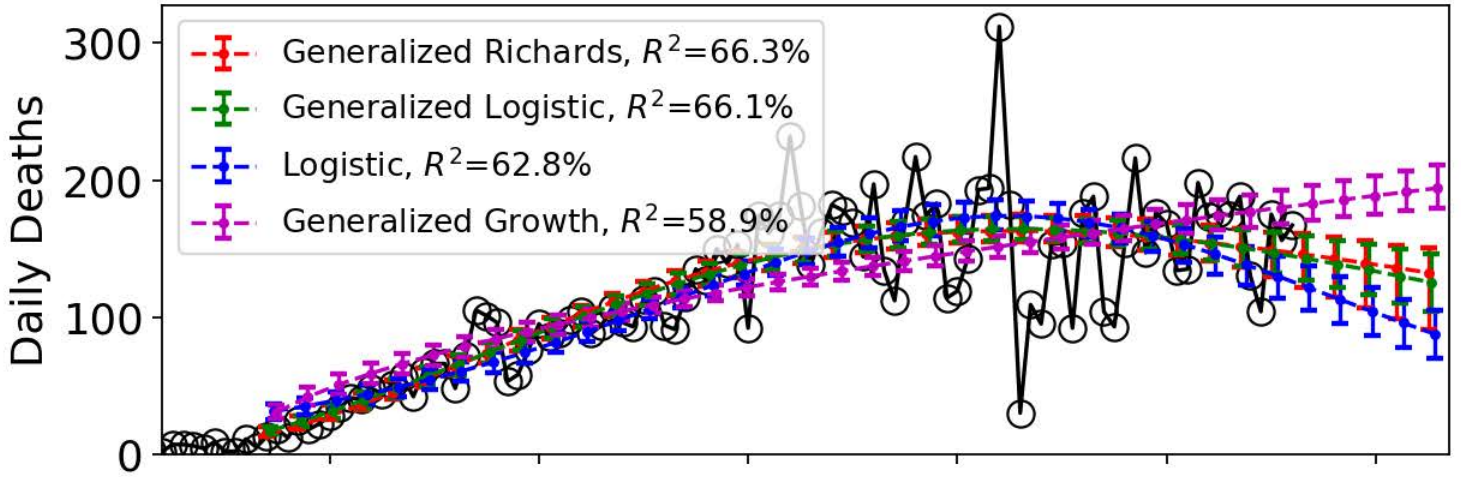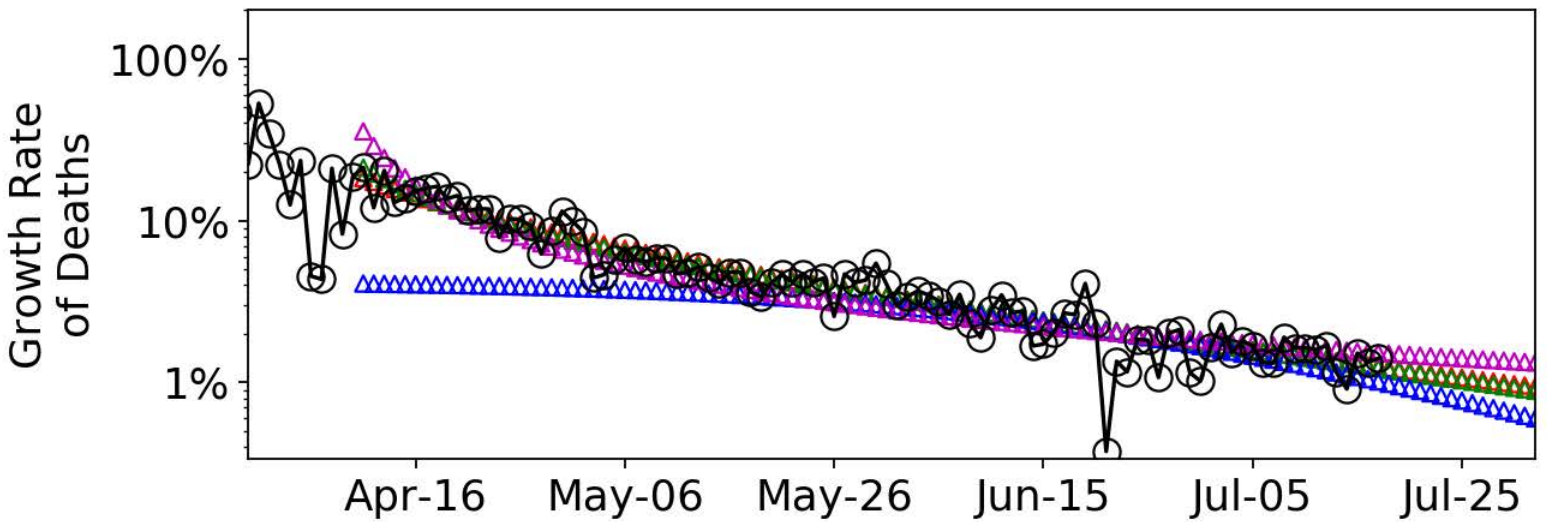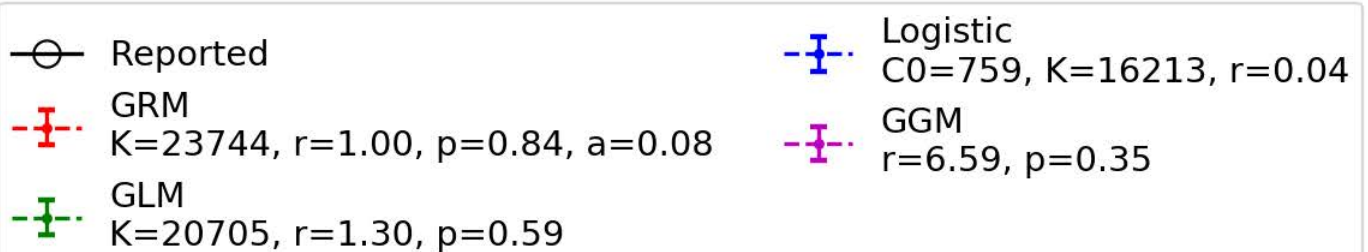



# Peru

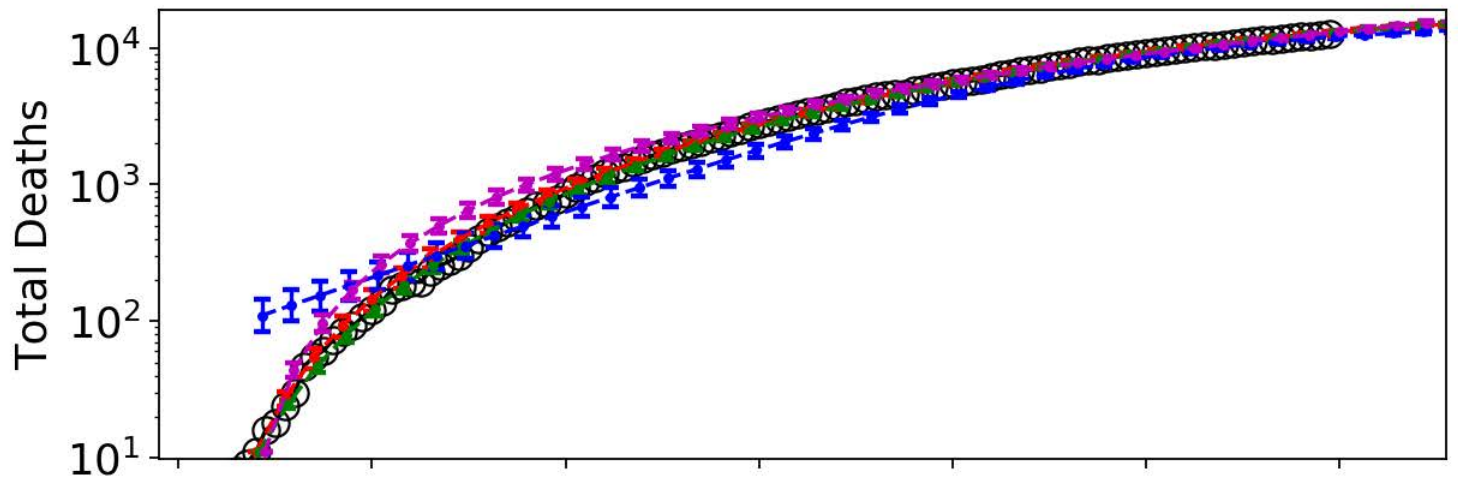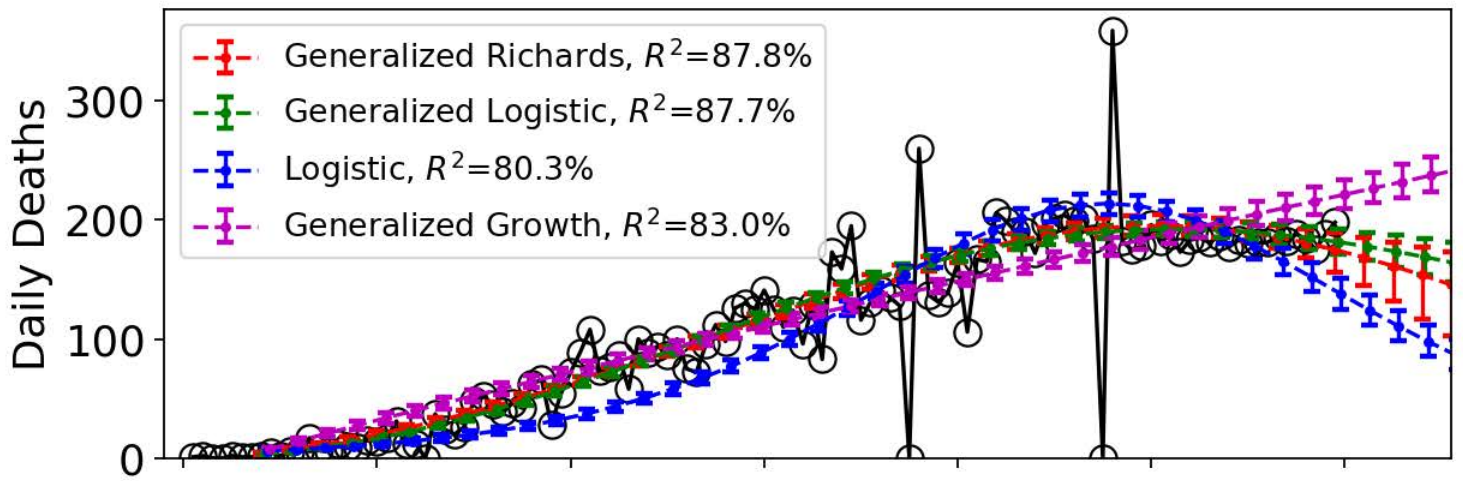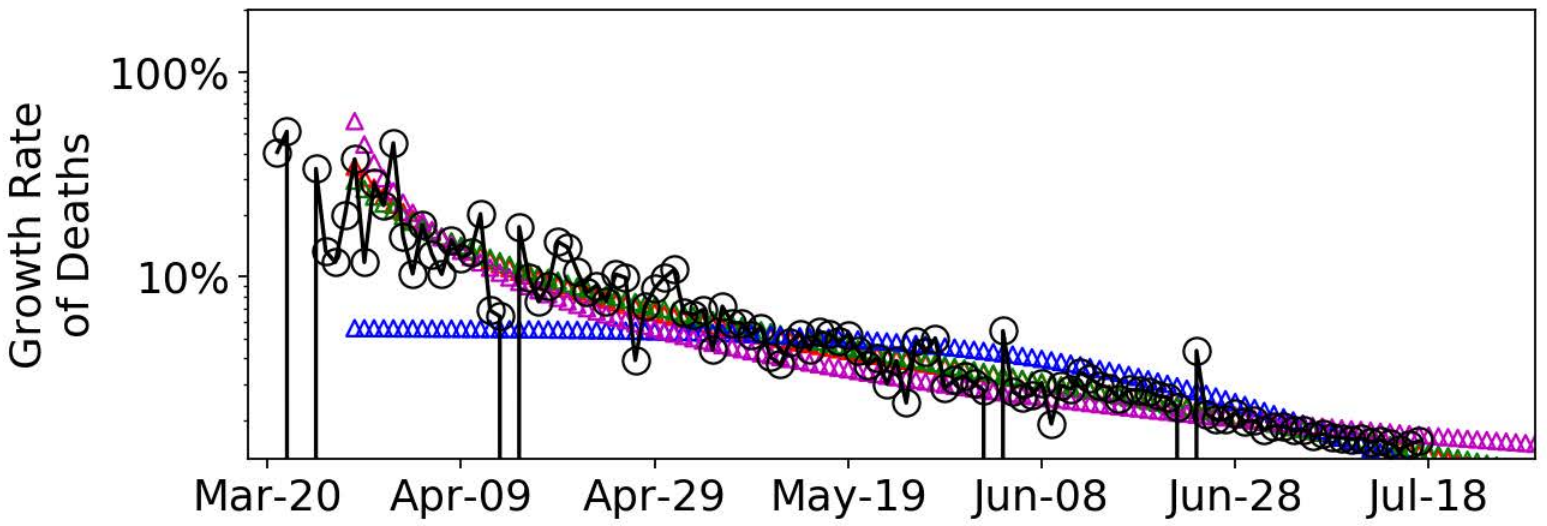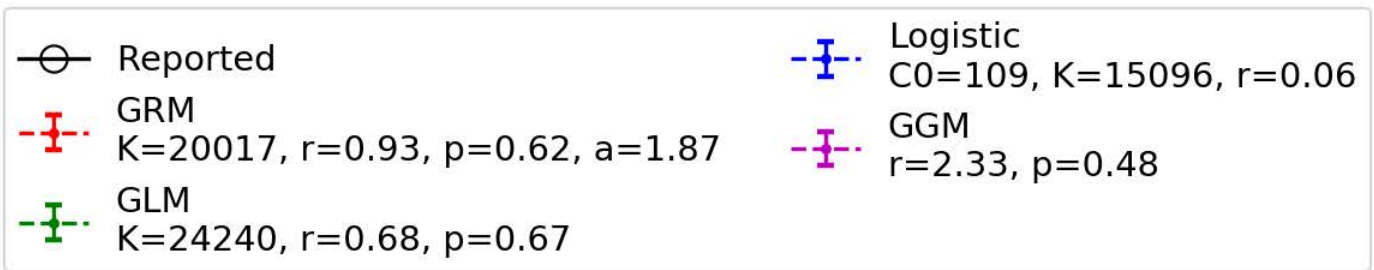

# Mexico

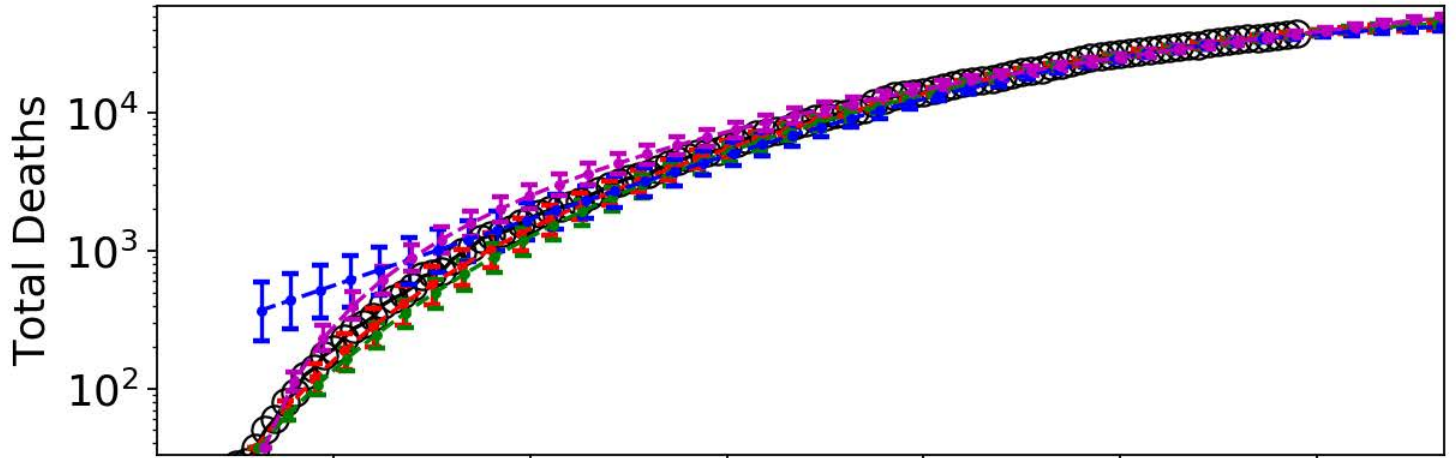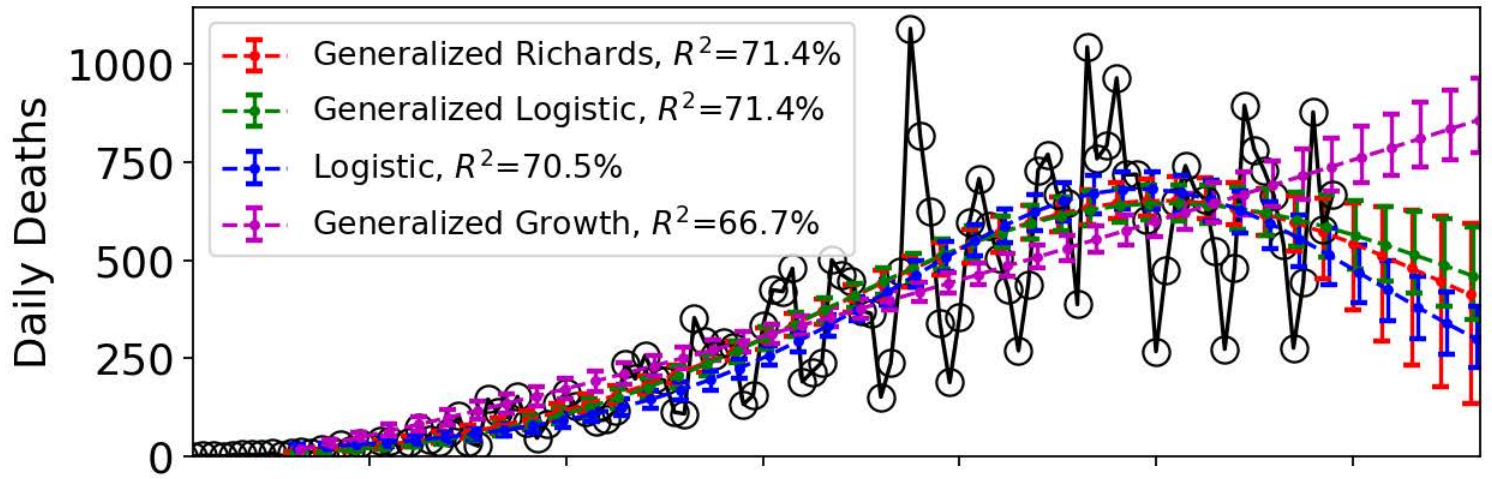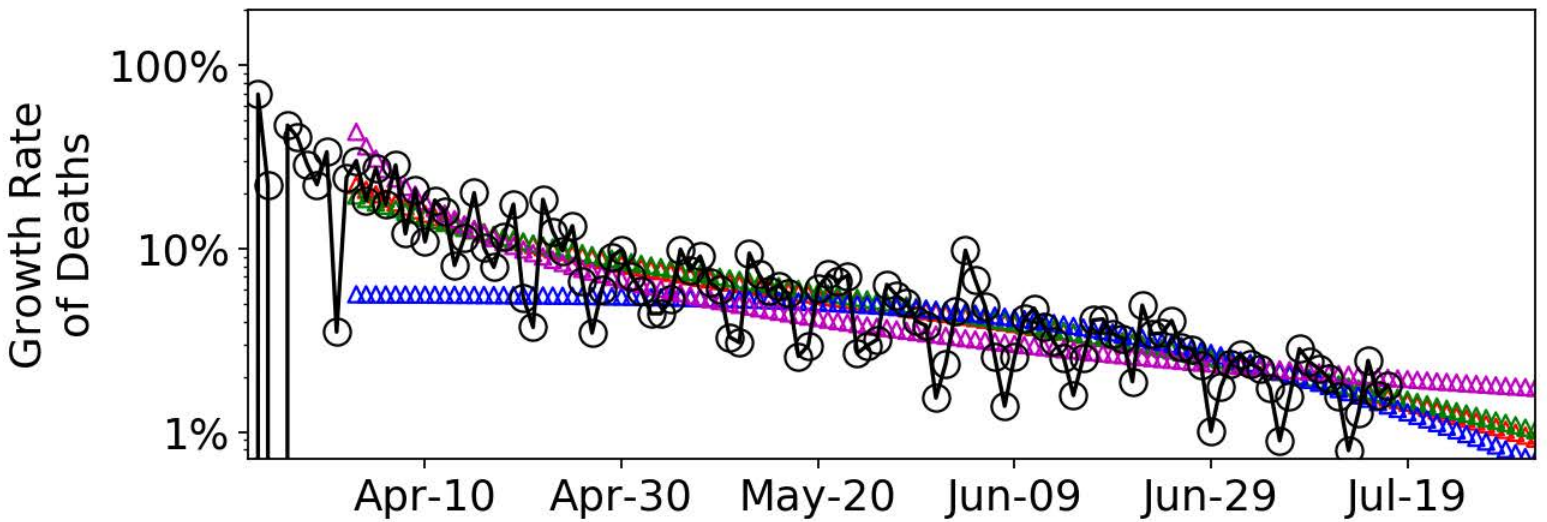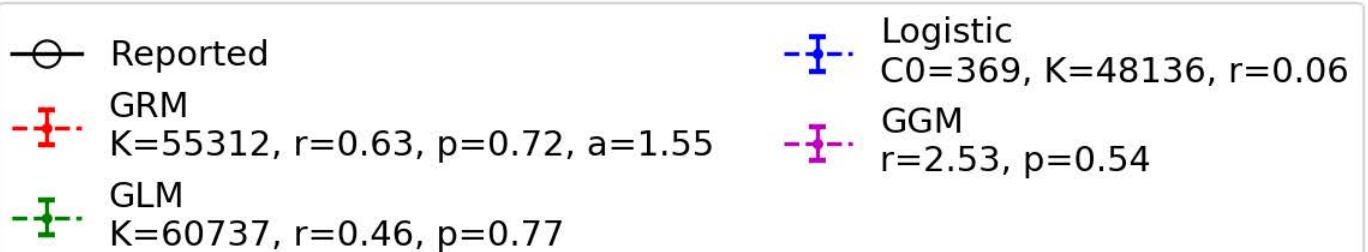

# Chile

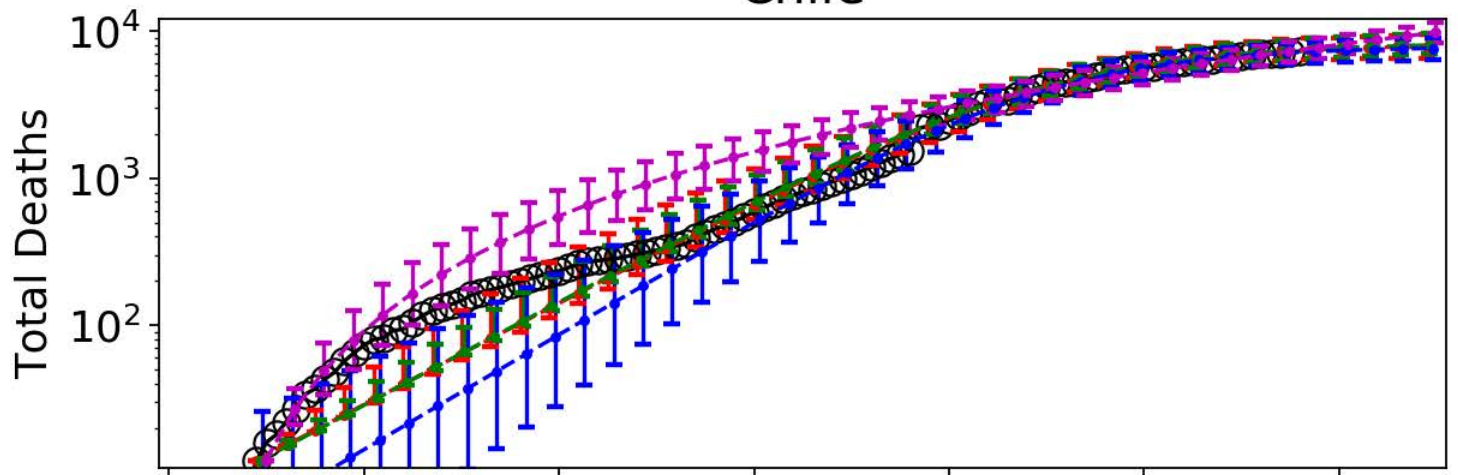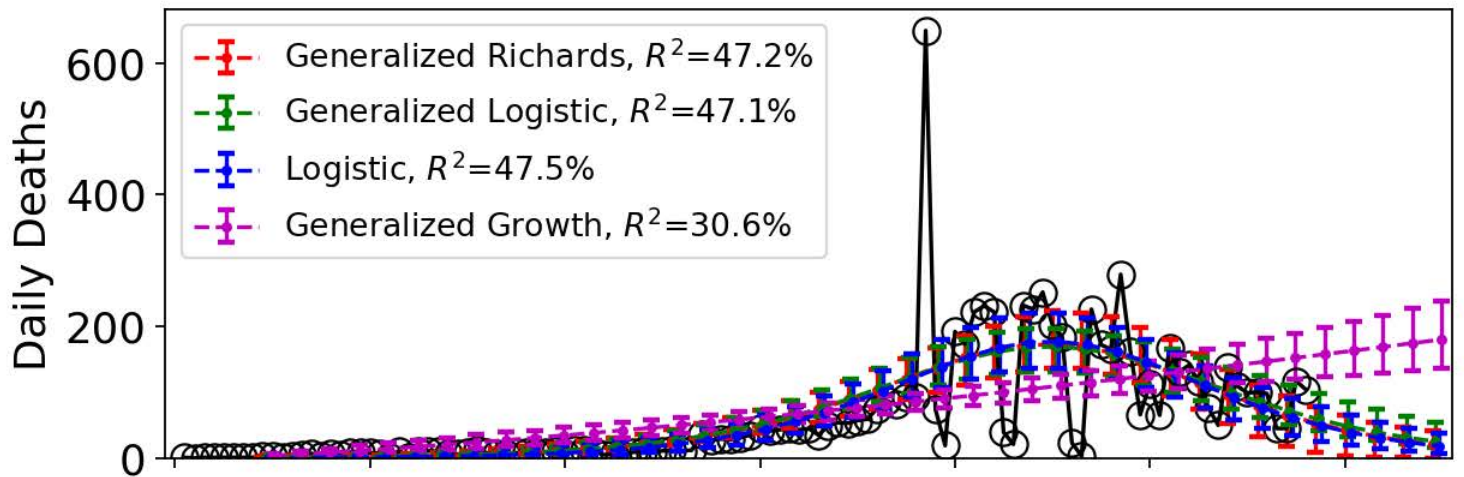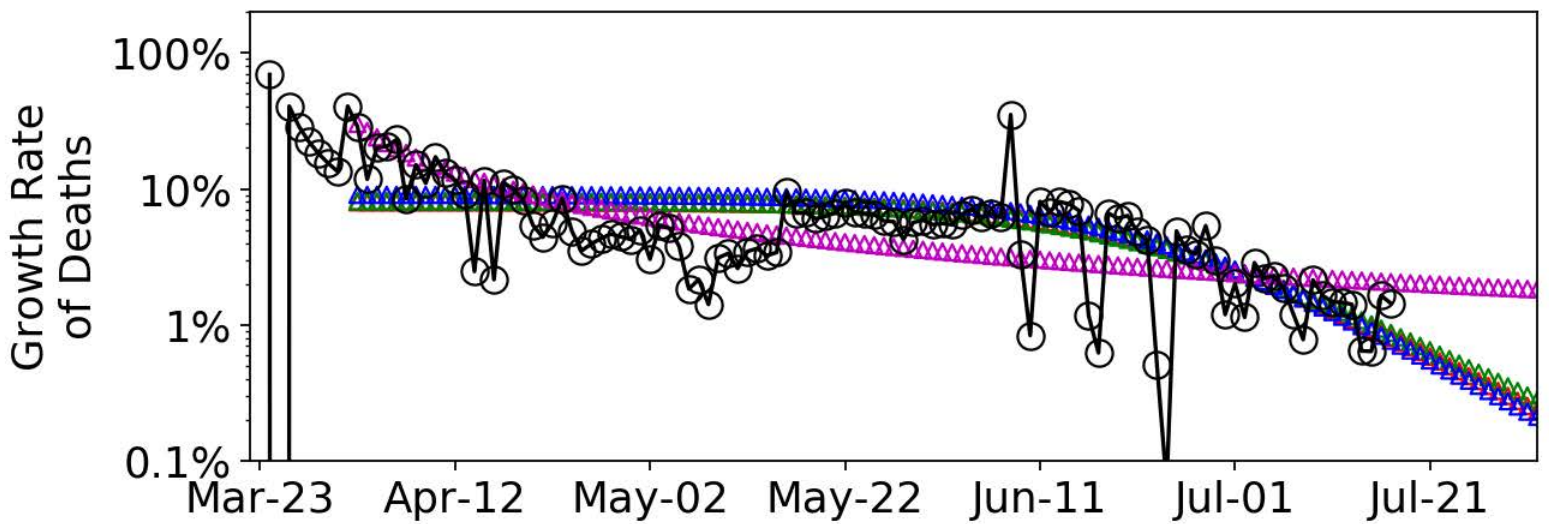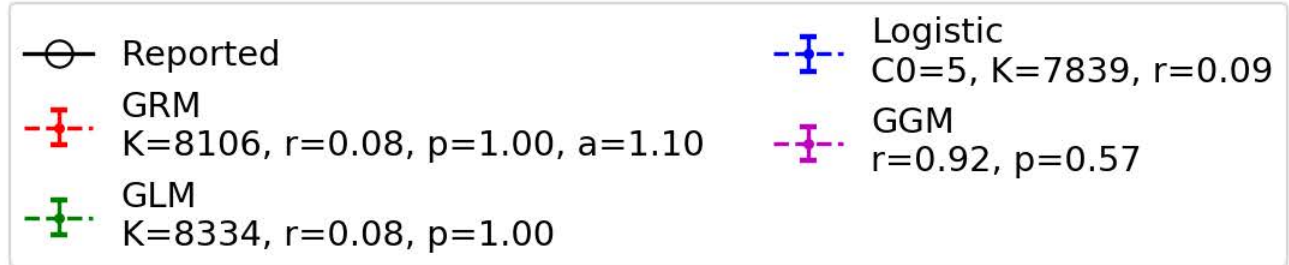



# United Kingdom

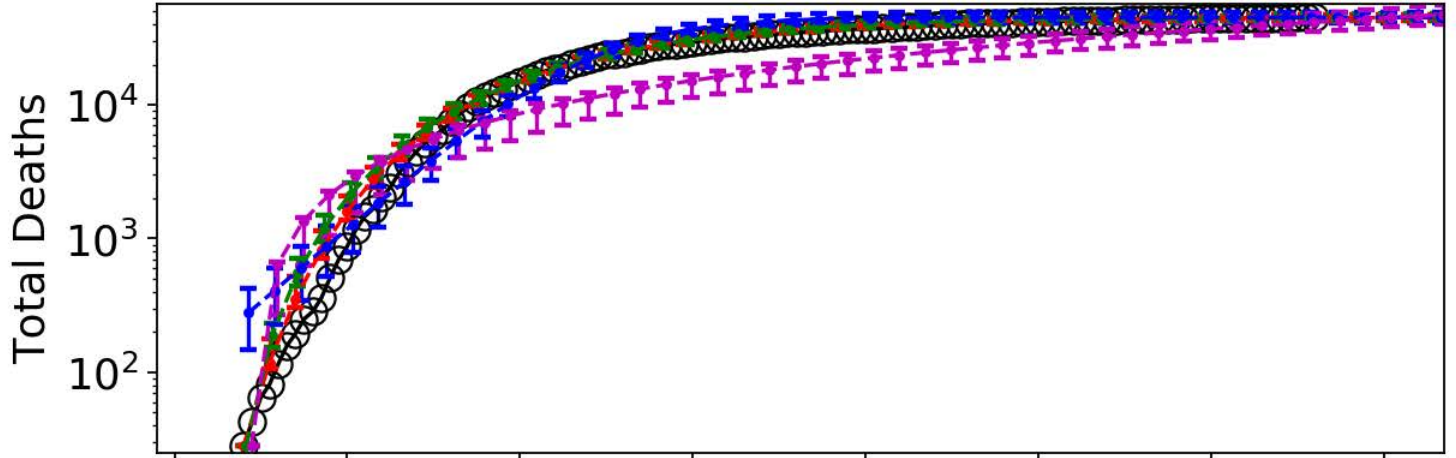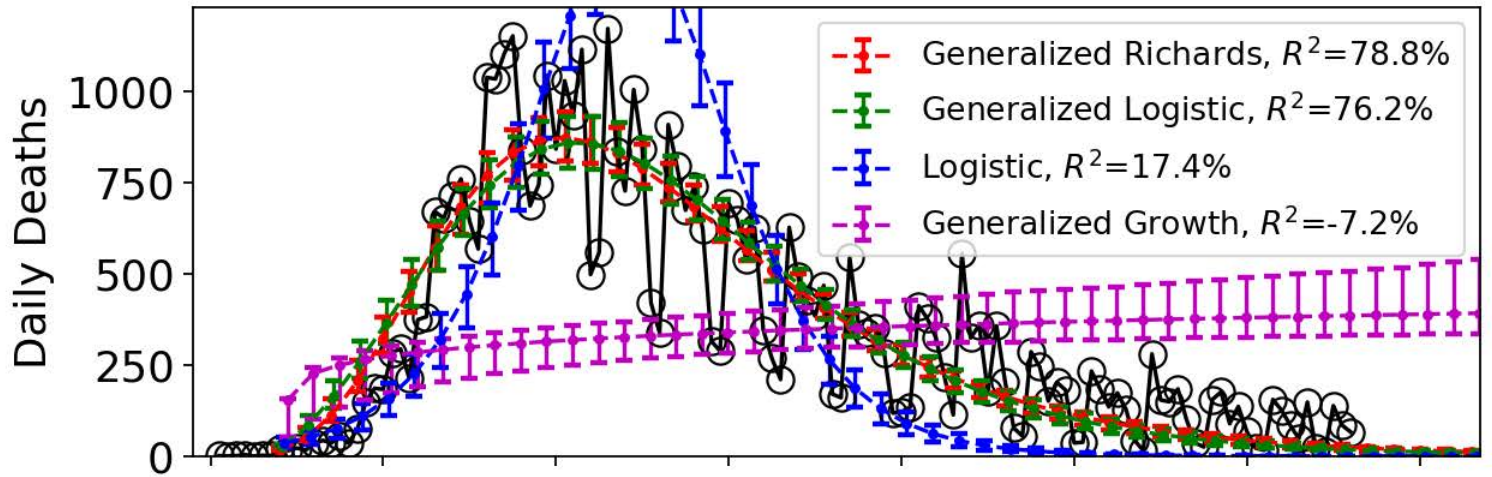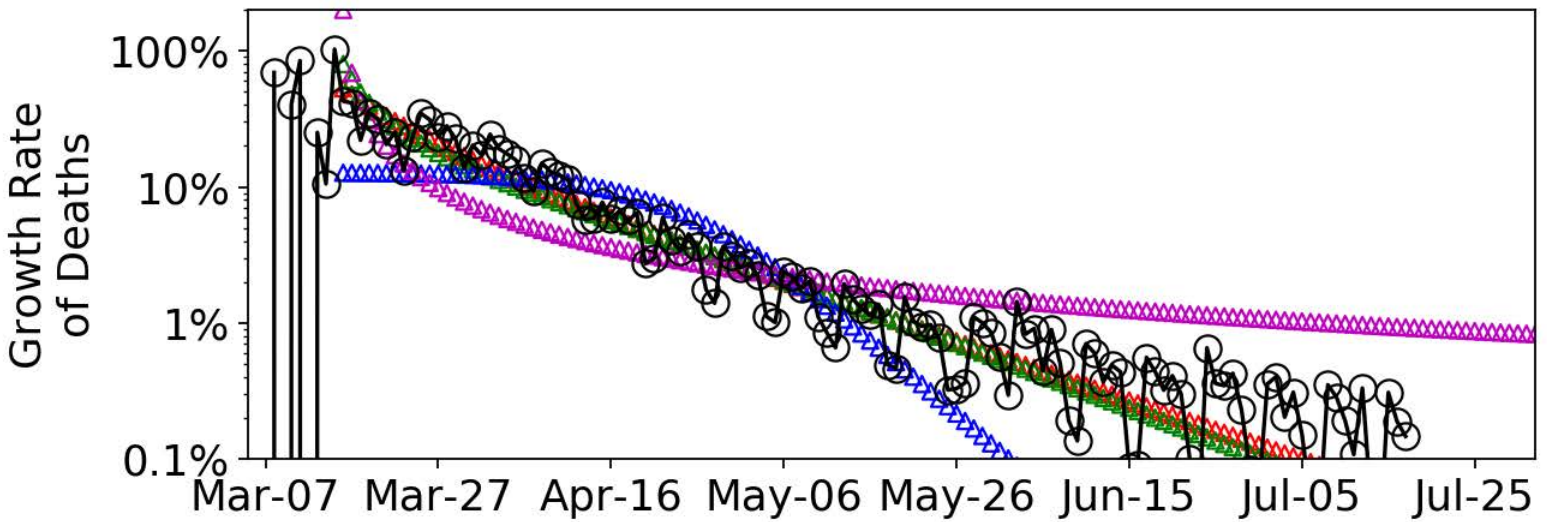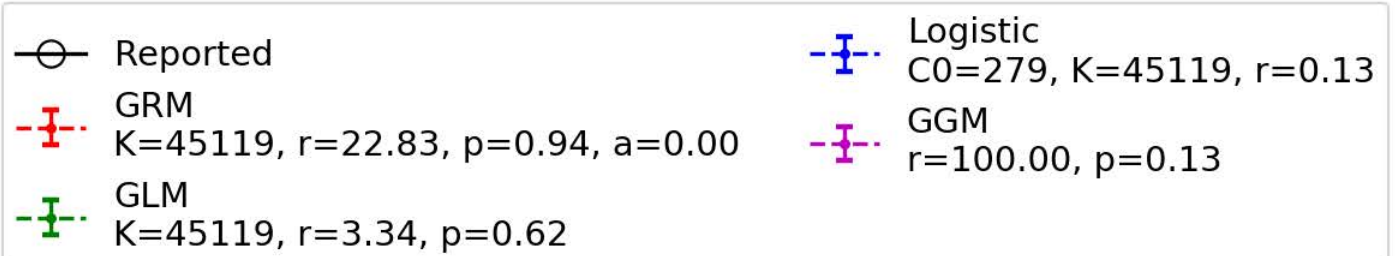

# Iran

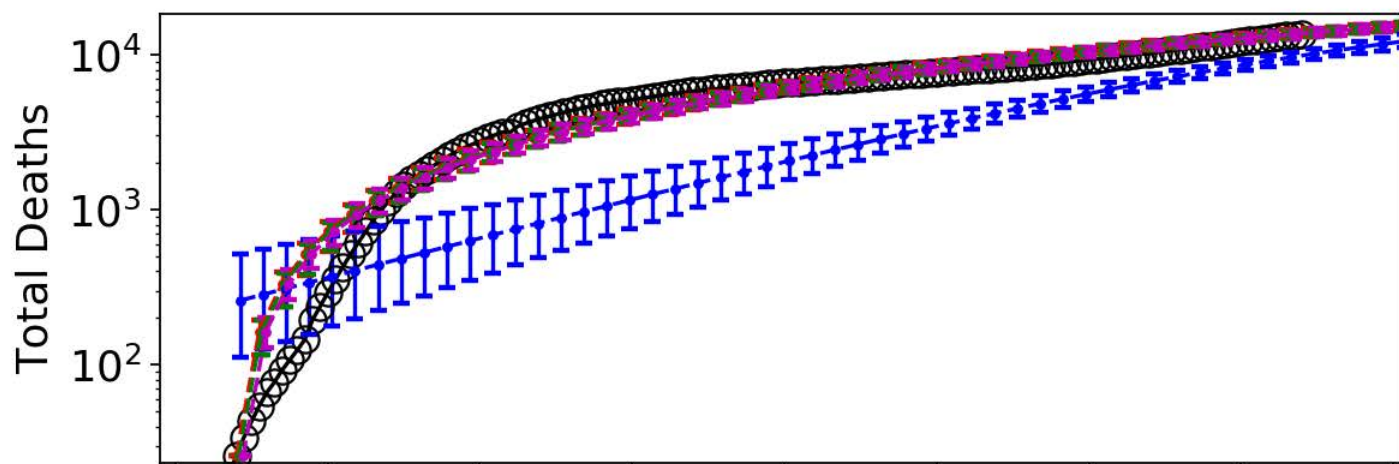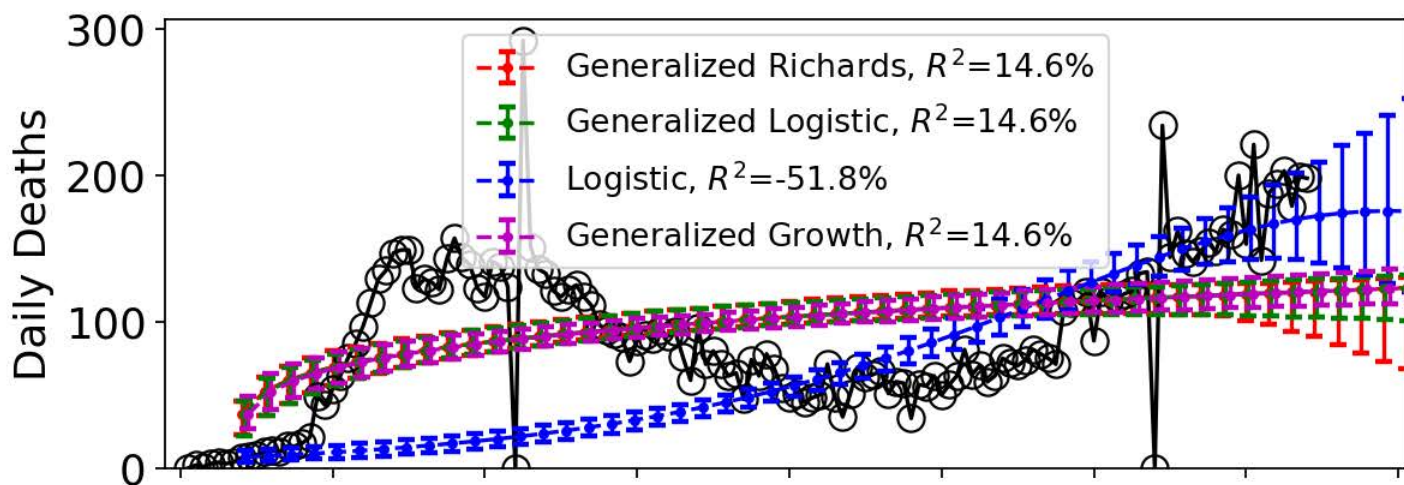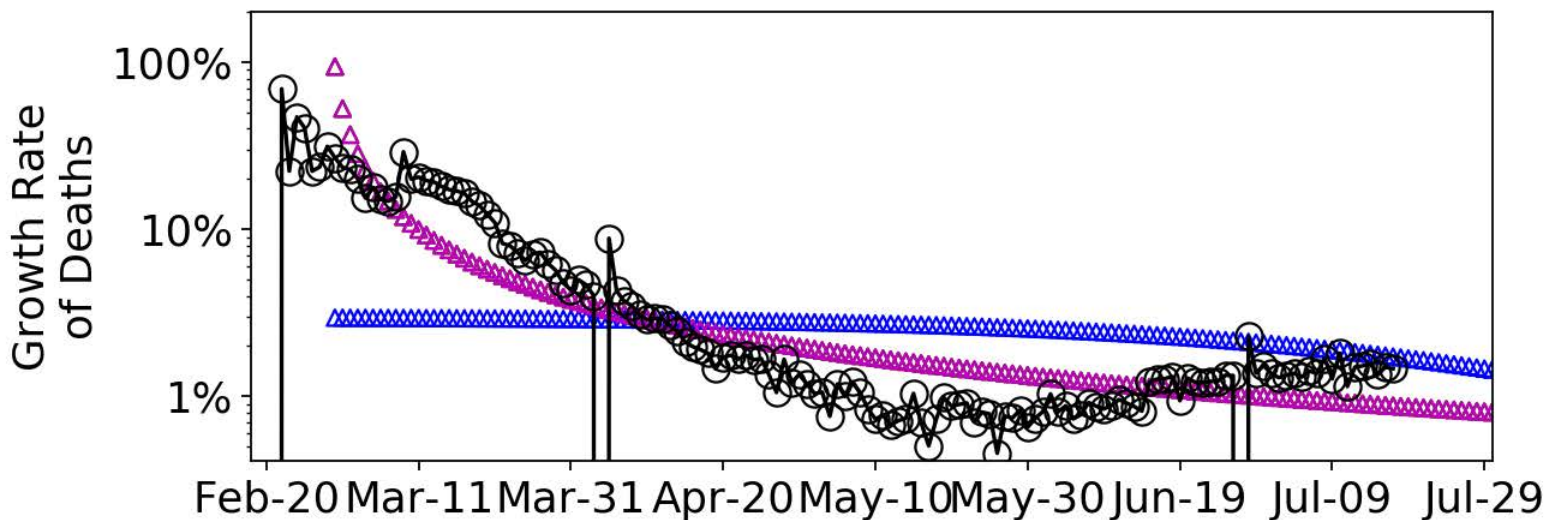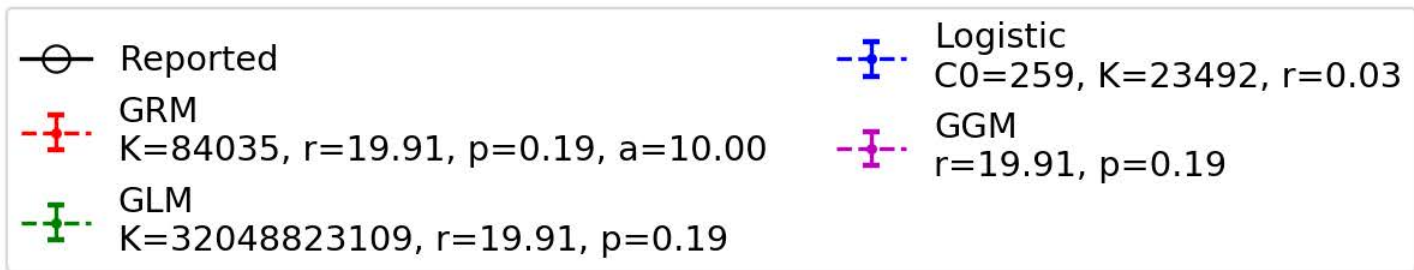



# Pakistan

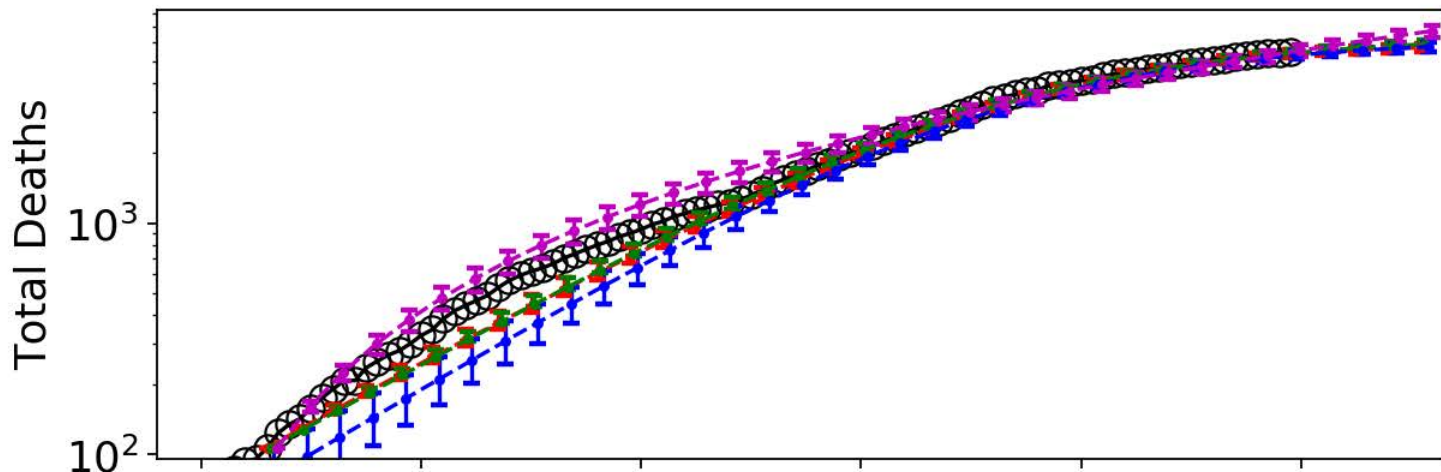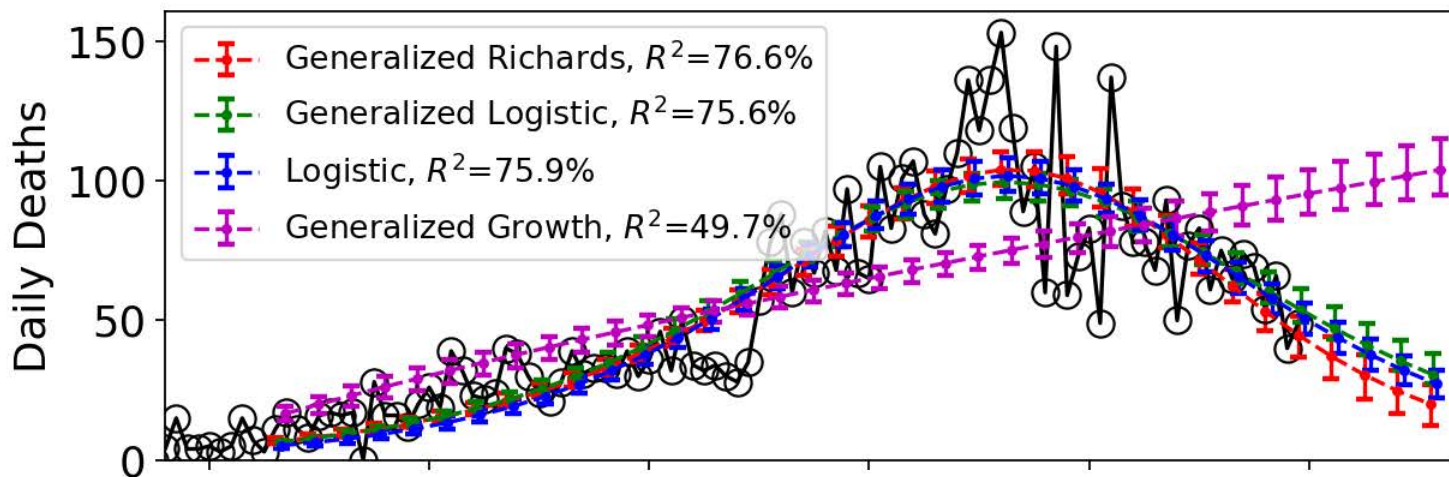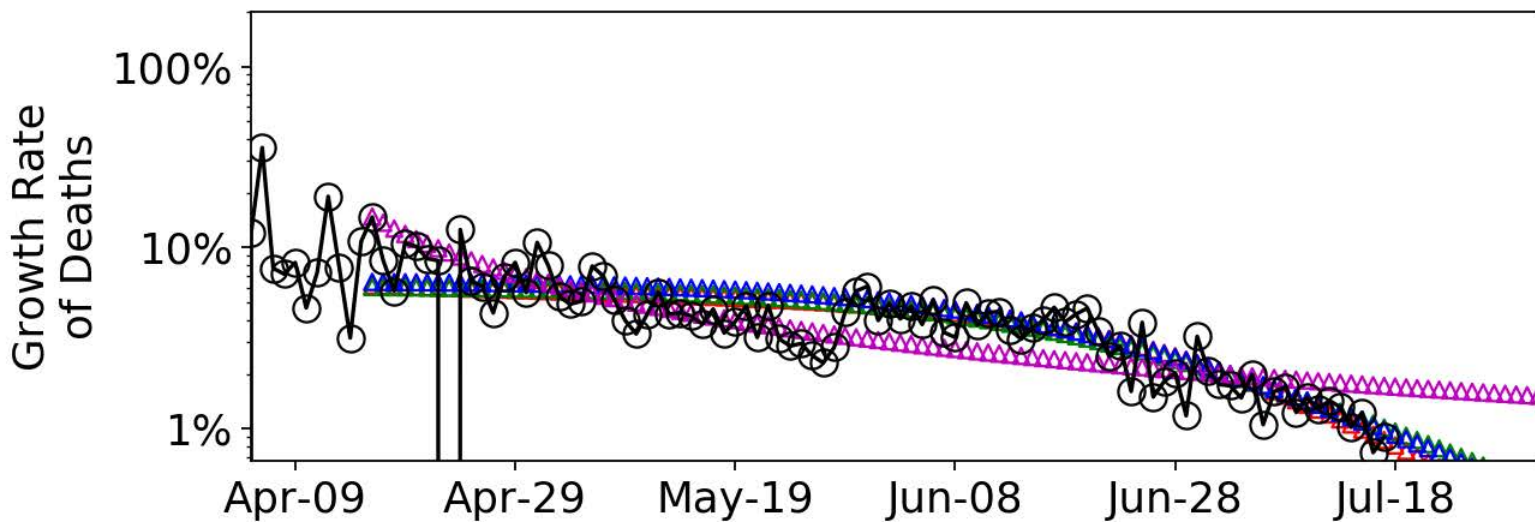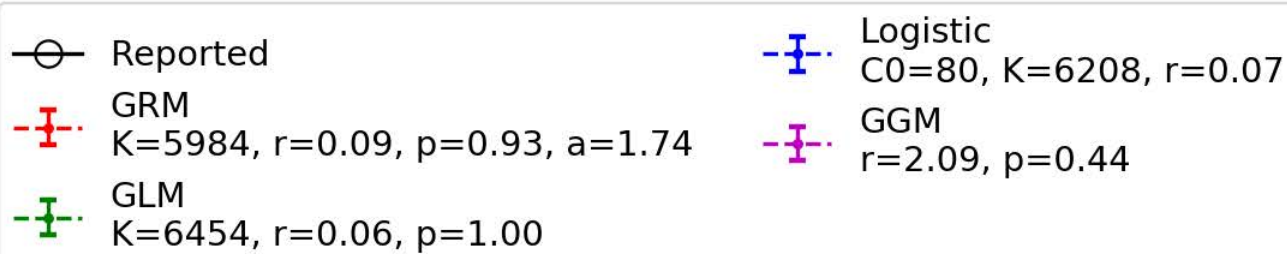



# Spain

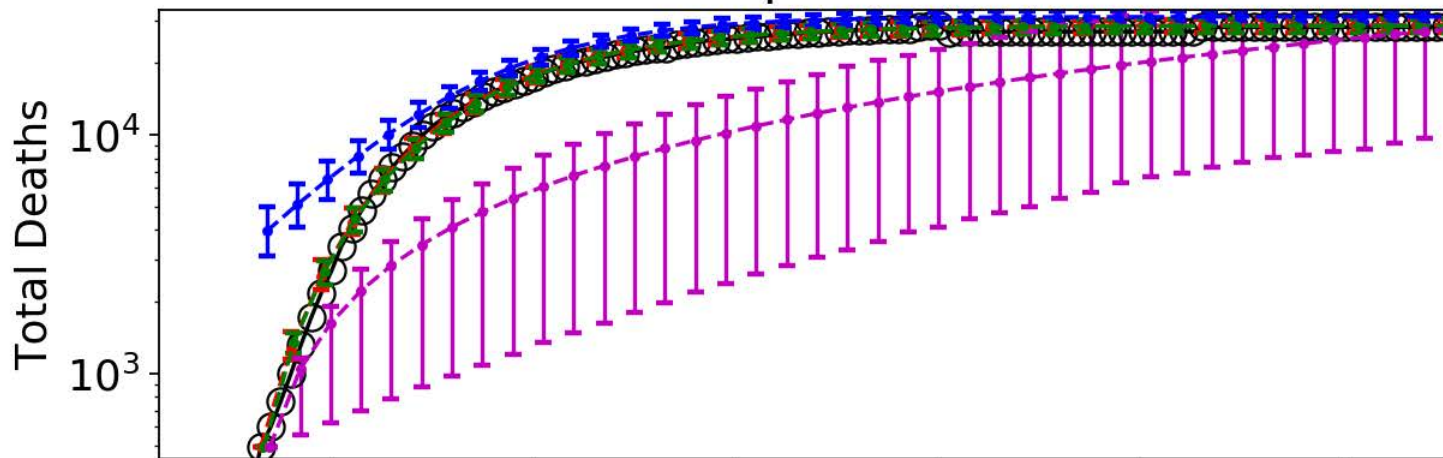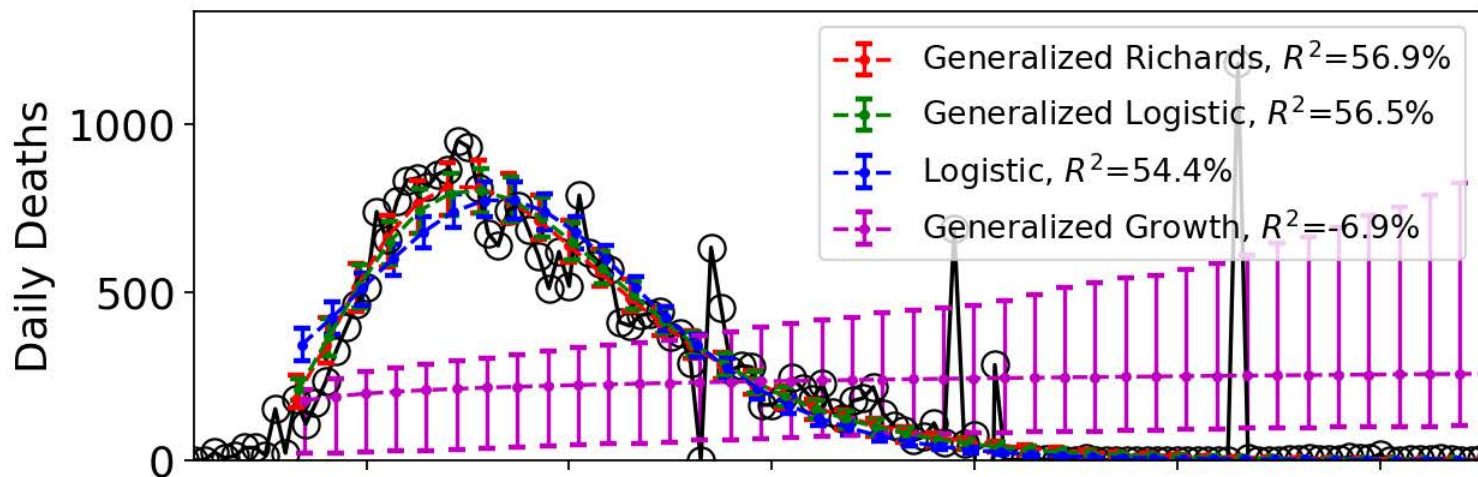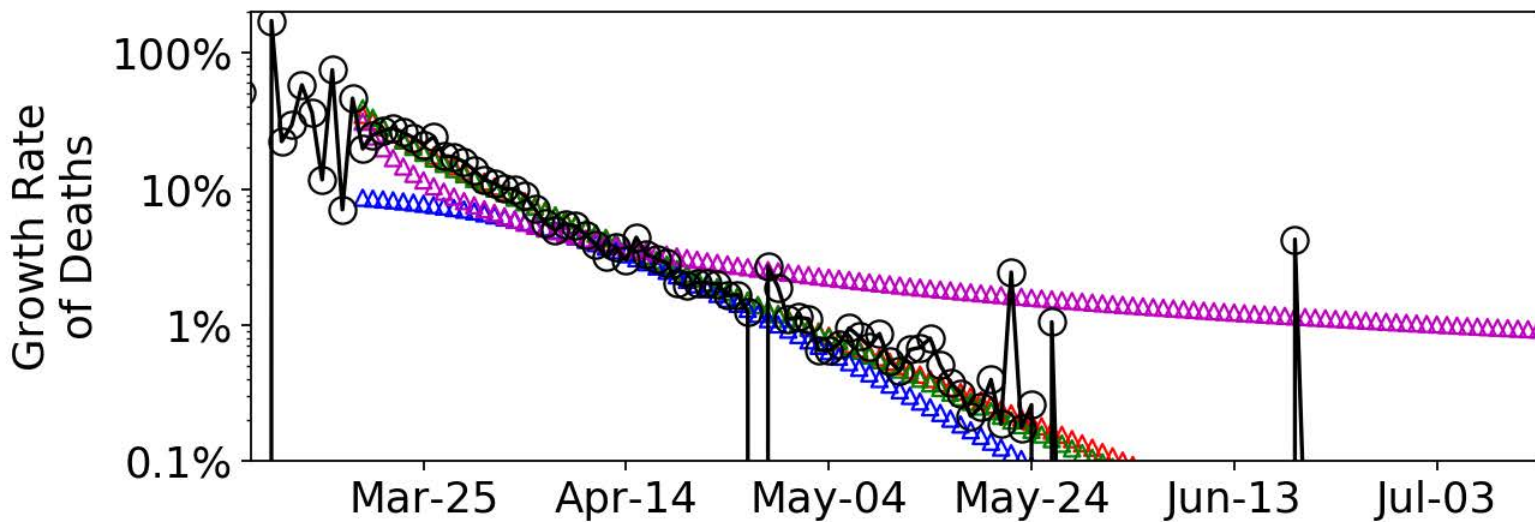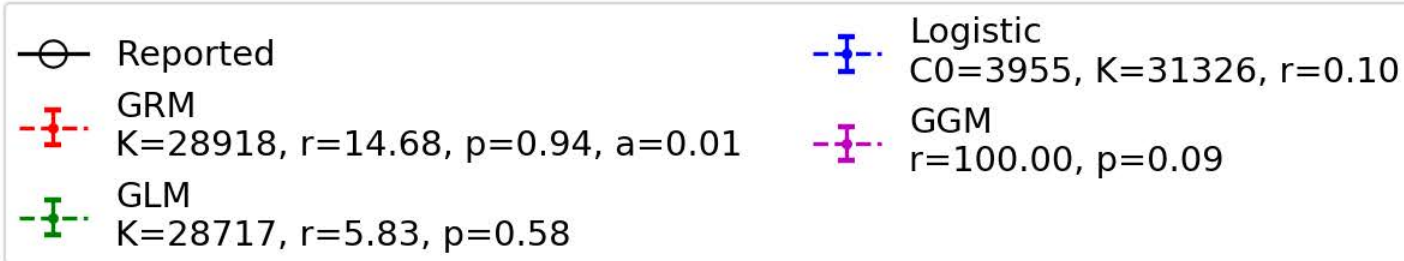

# Italy

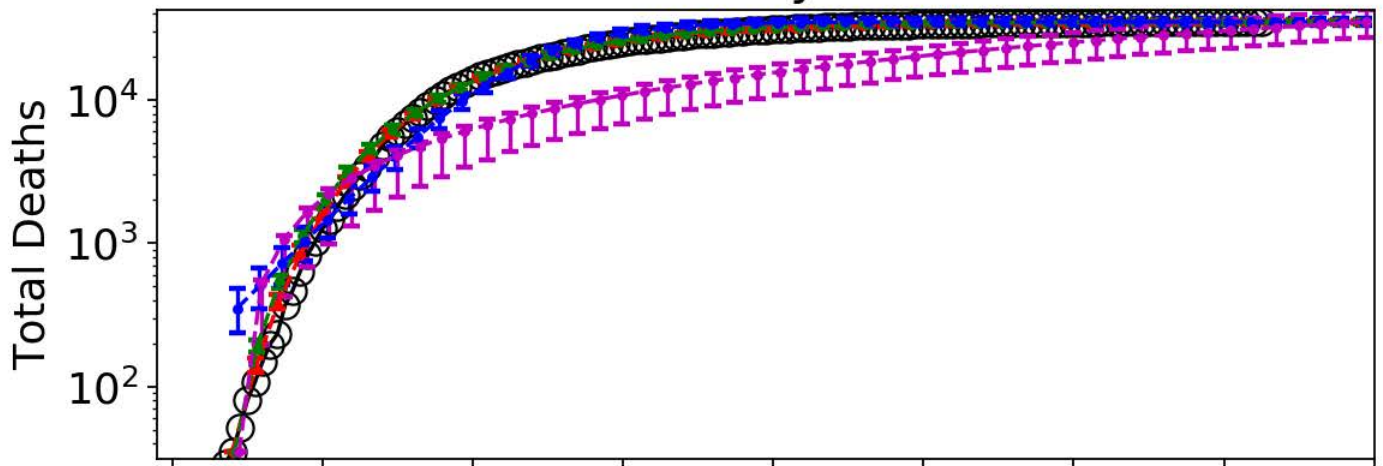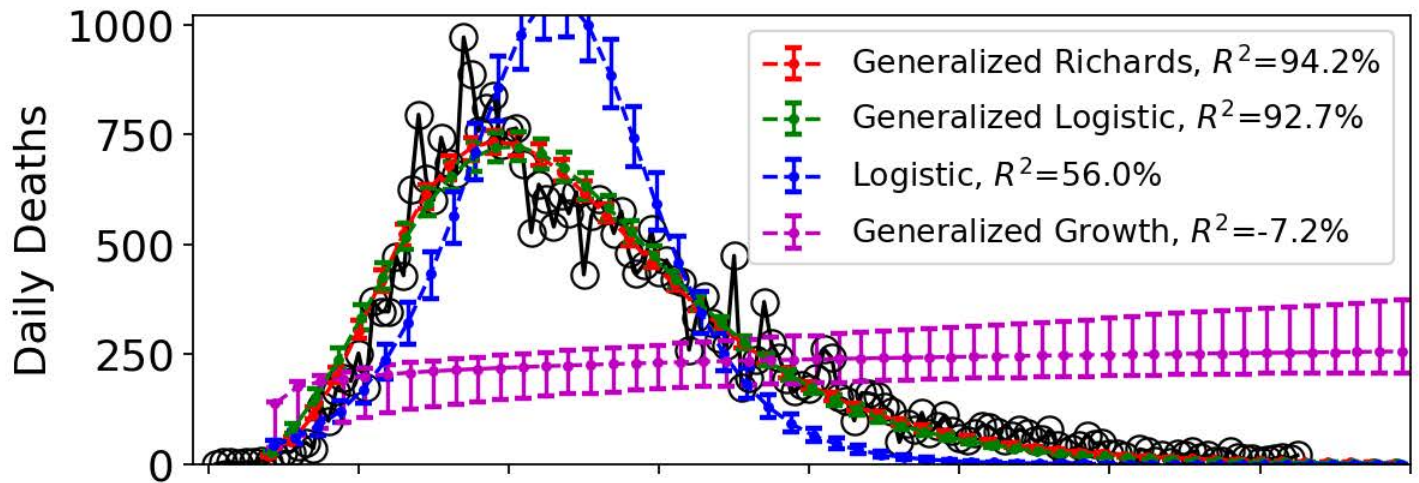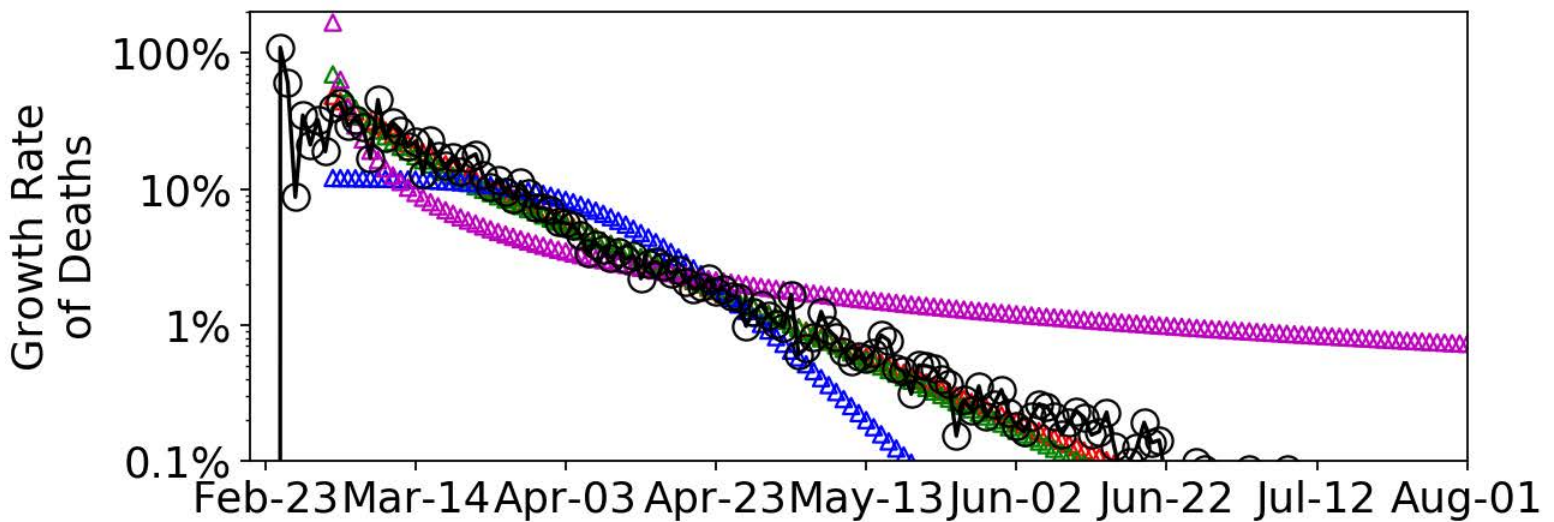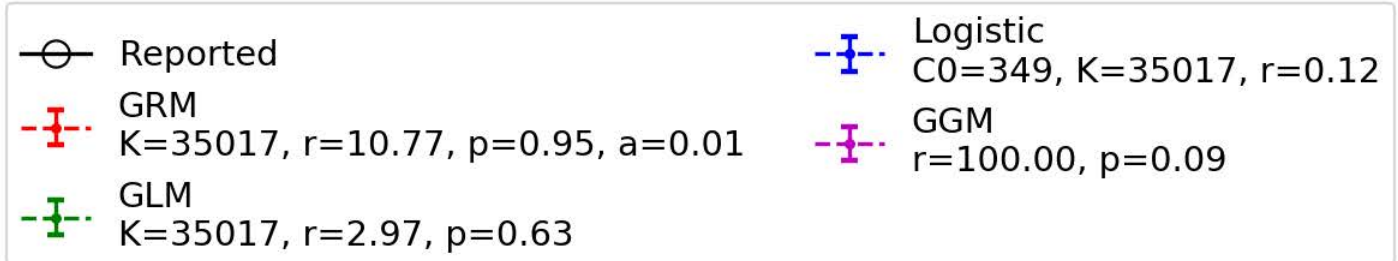

# Saudi Arabia

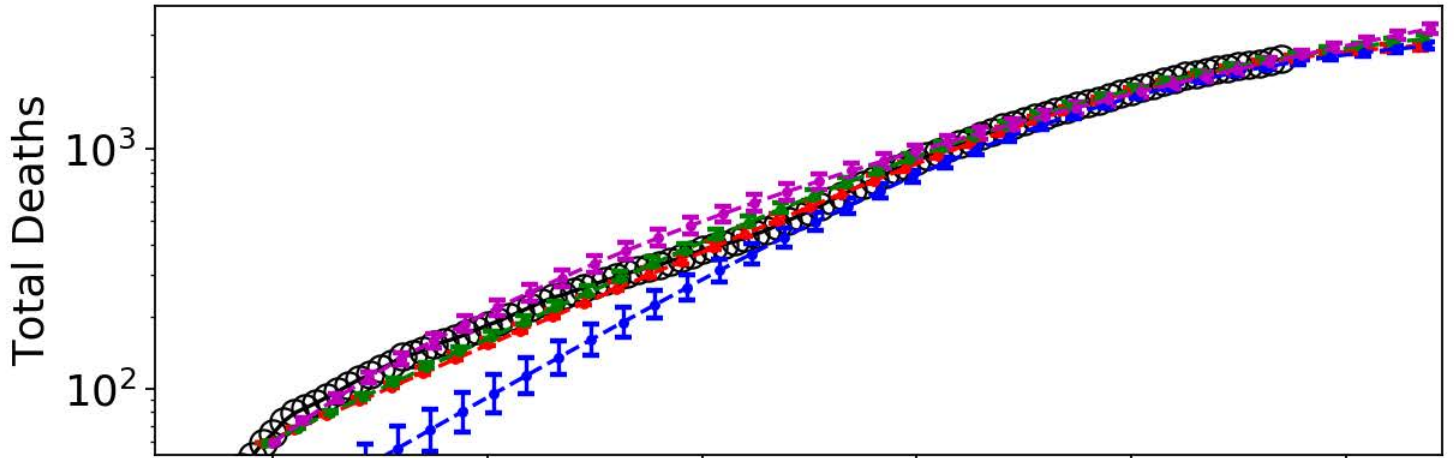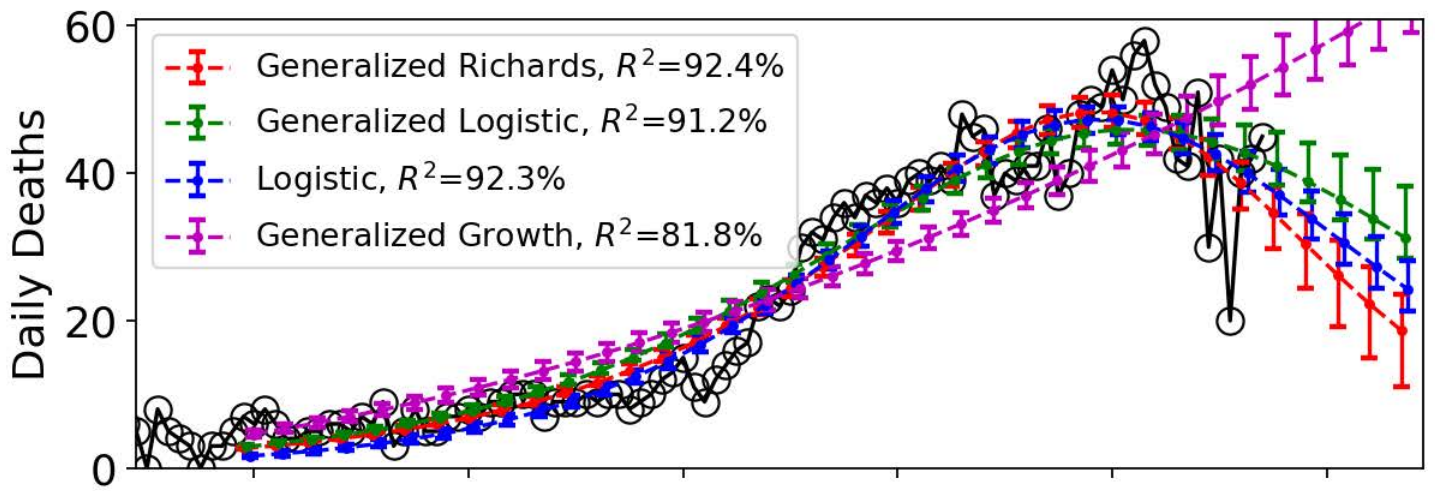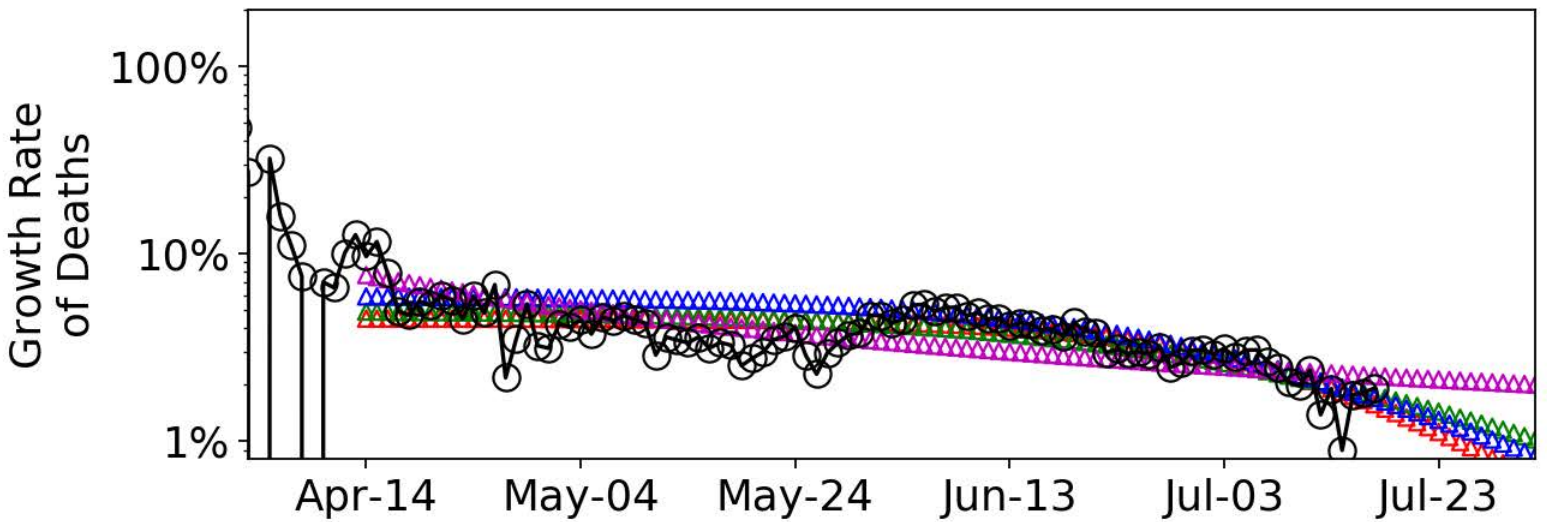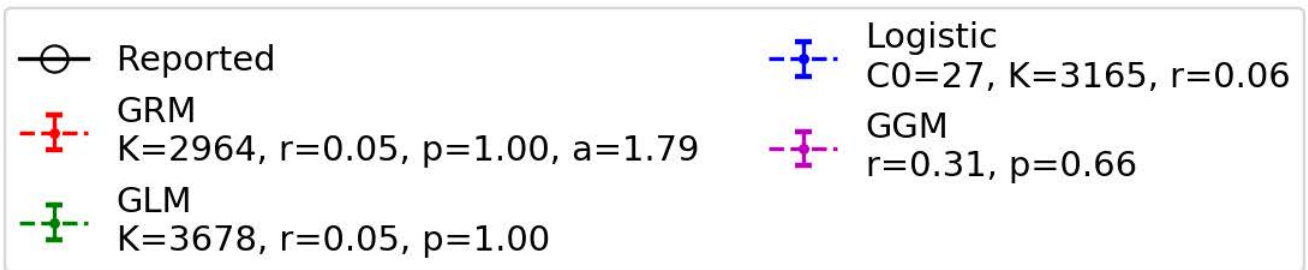



# Turkey

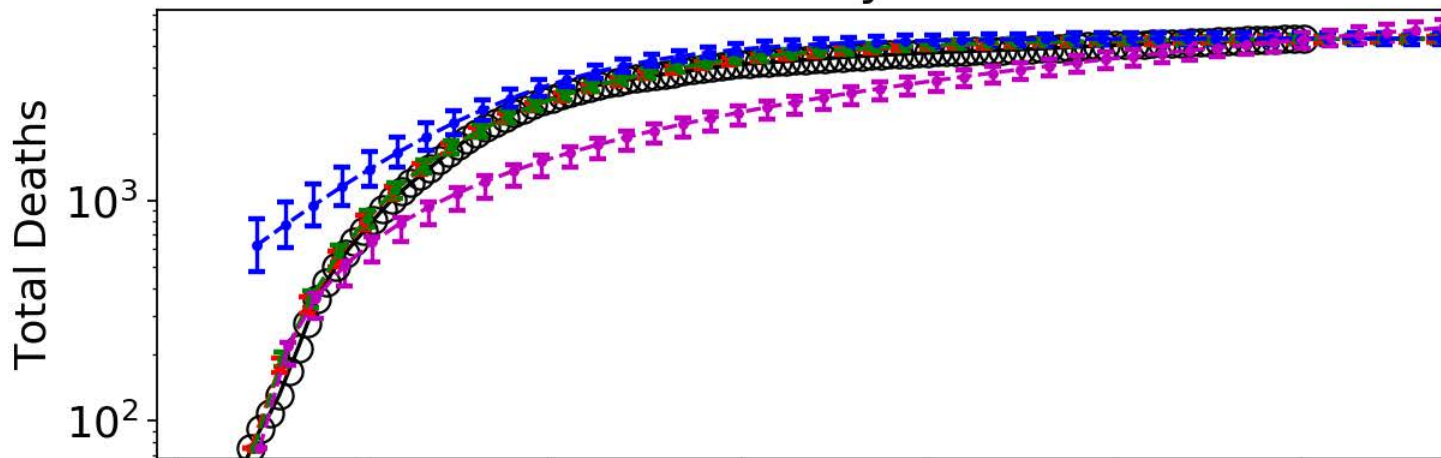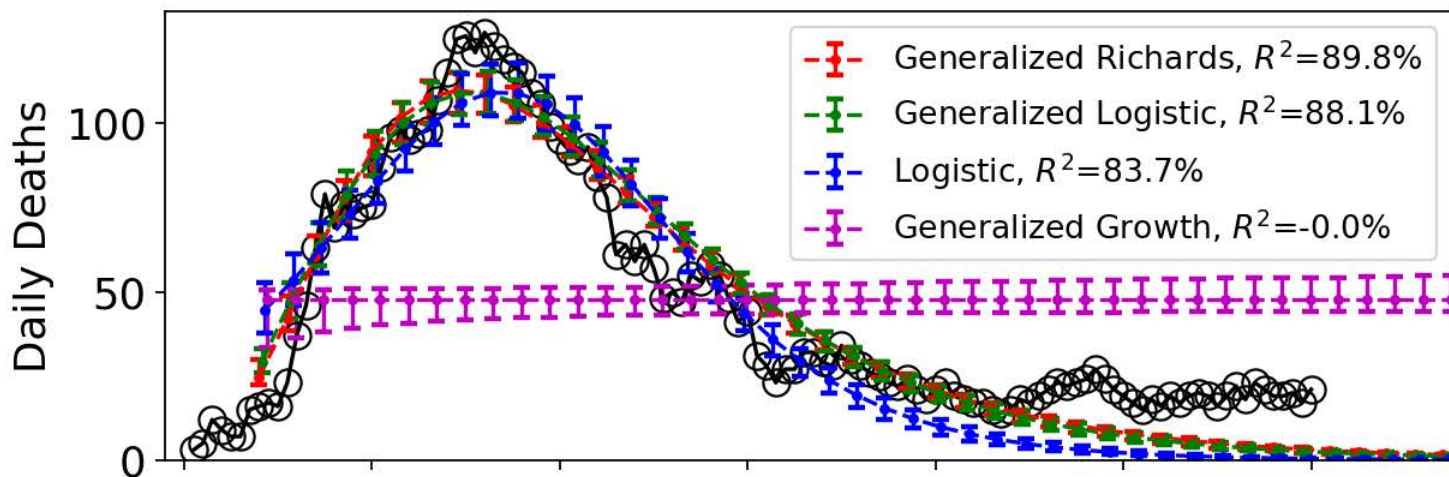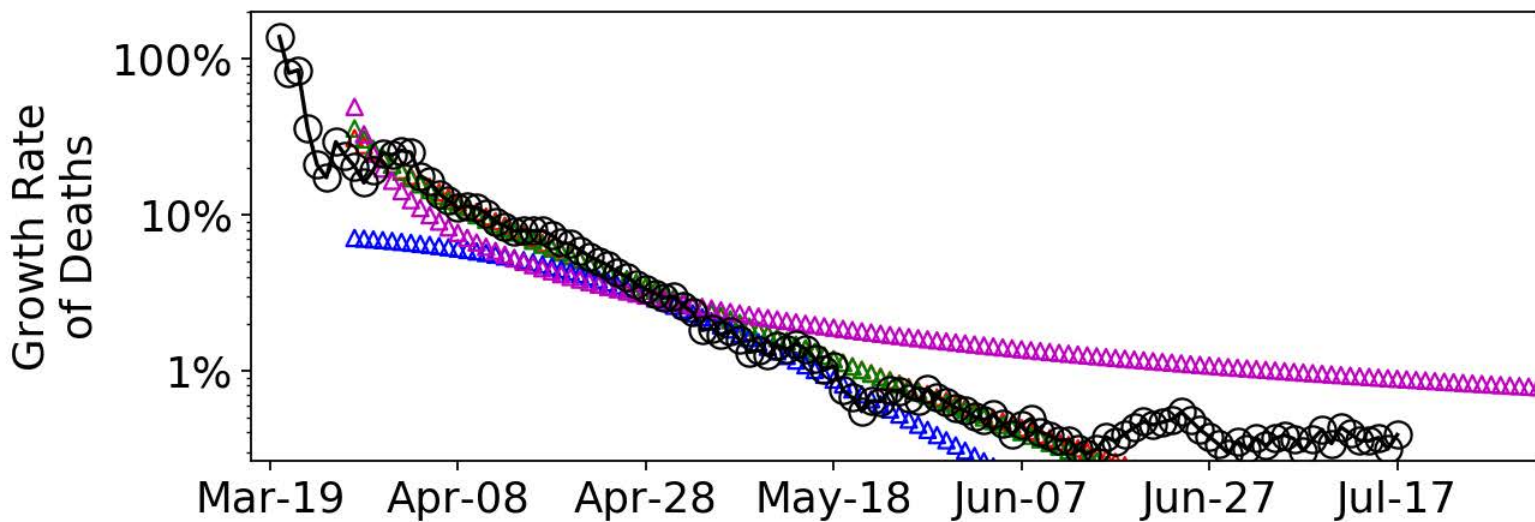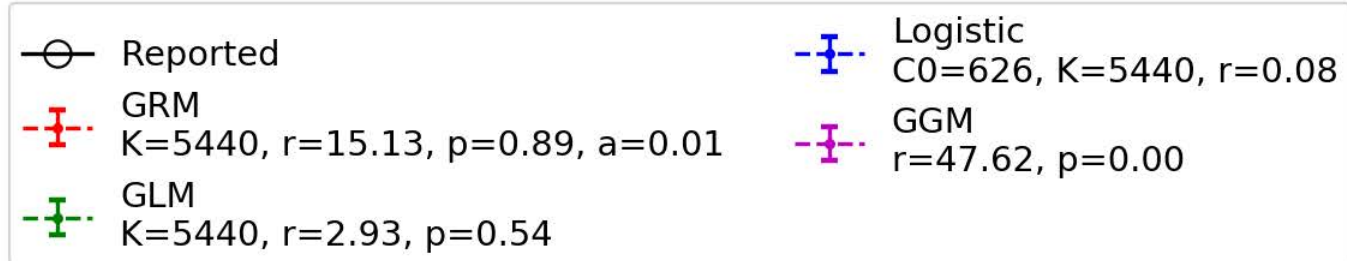

# Germany

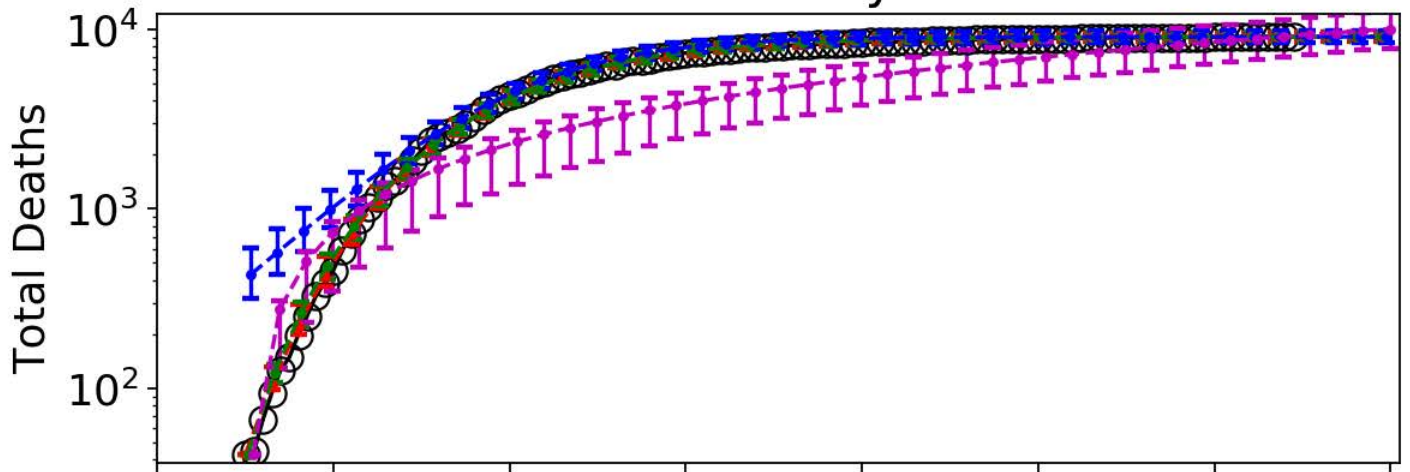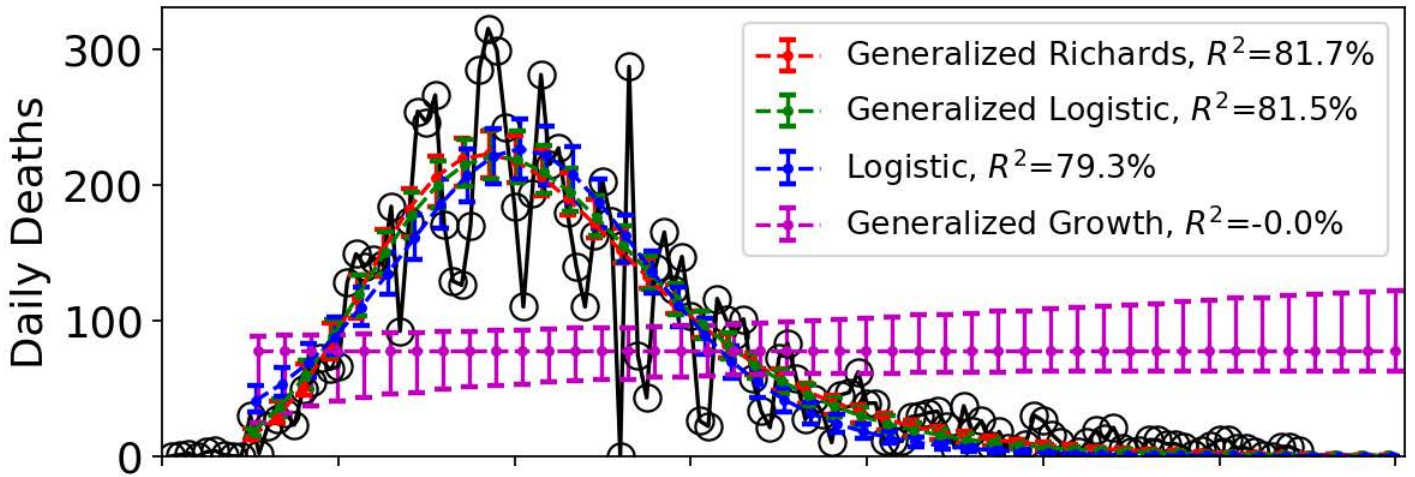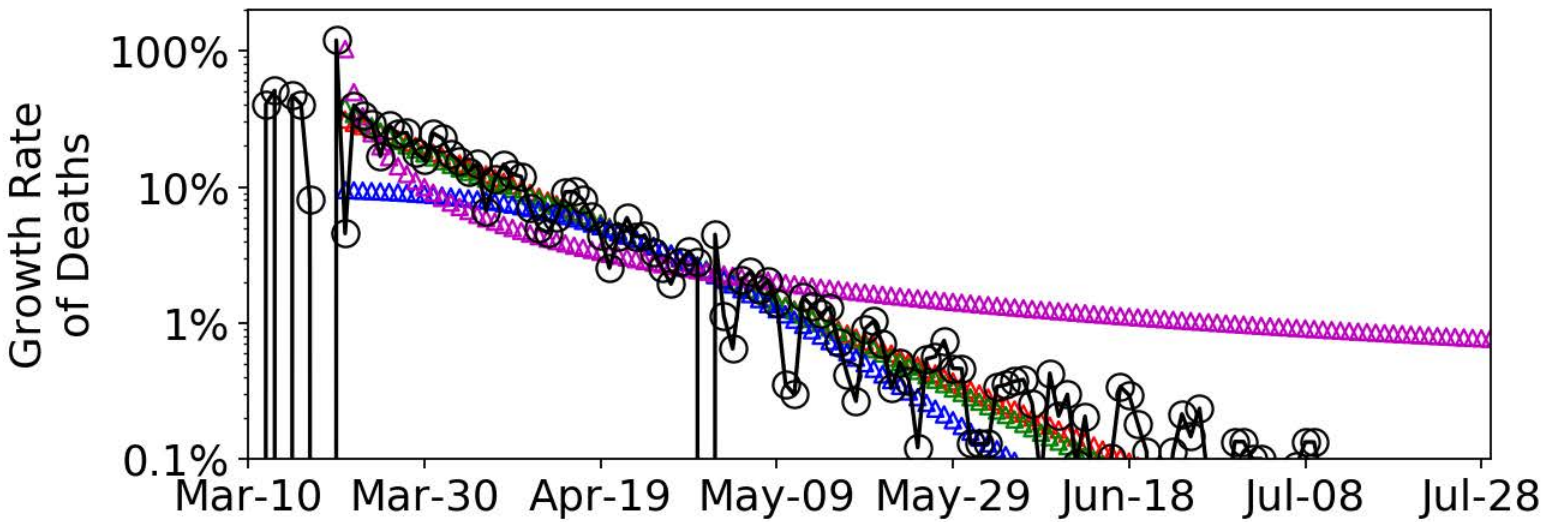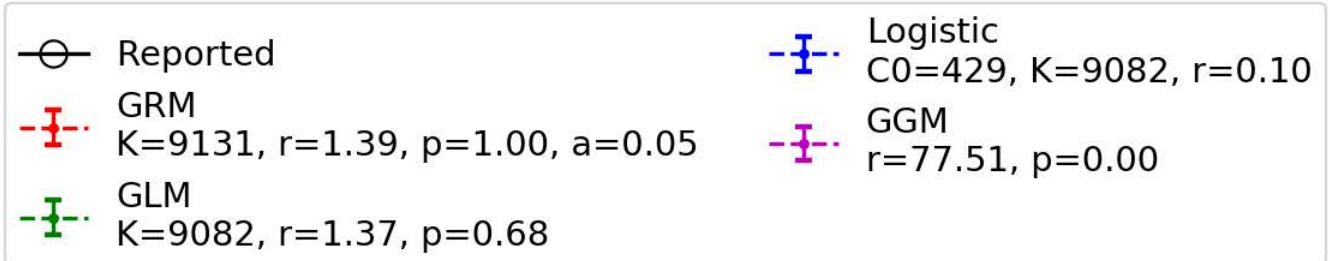

# France

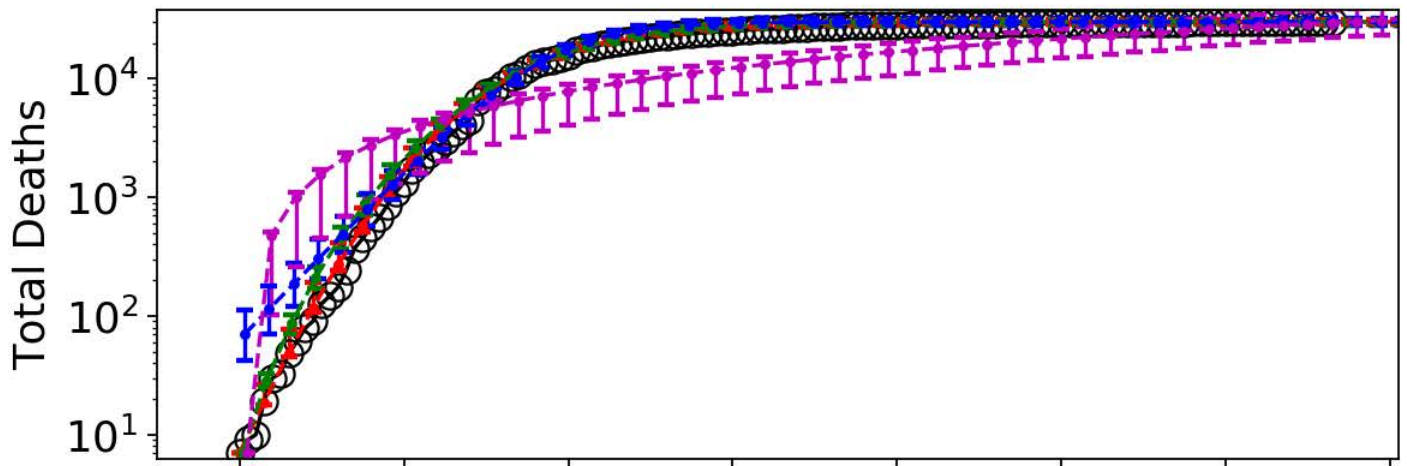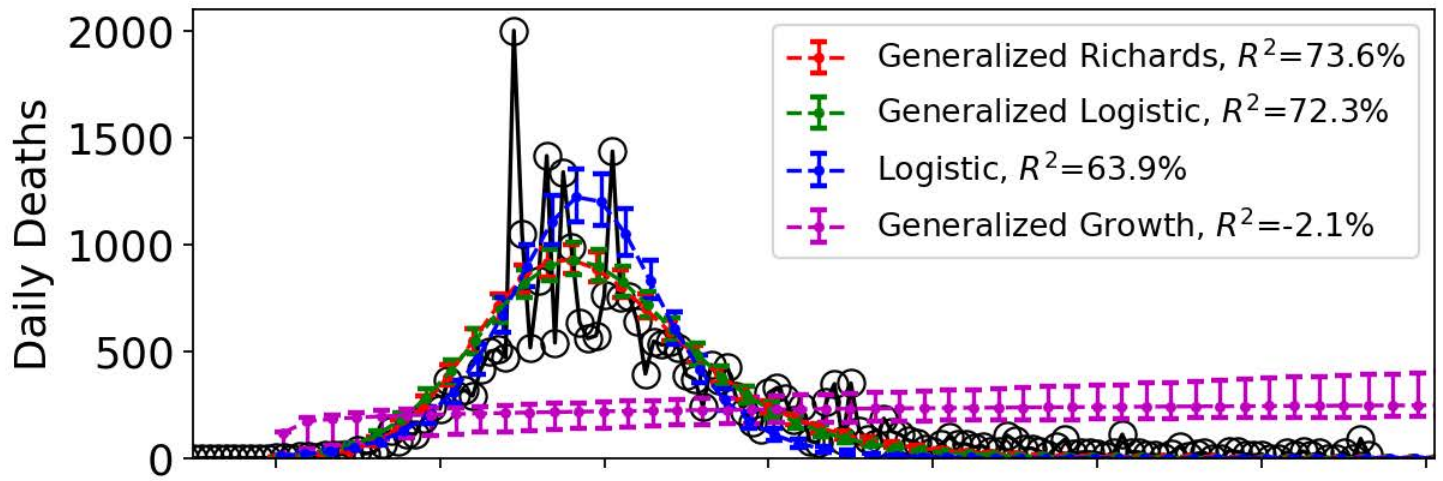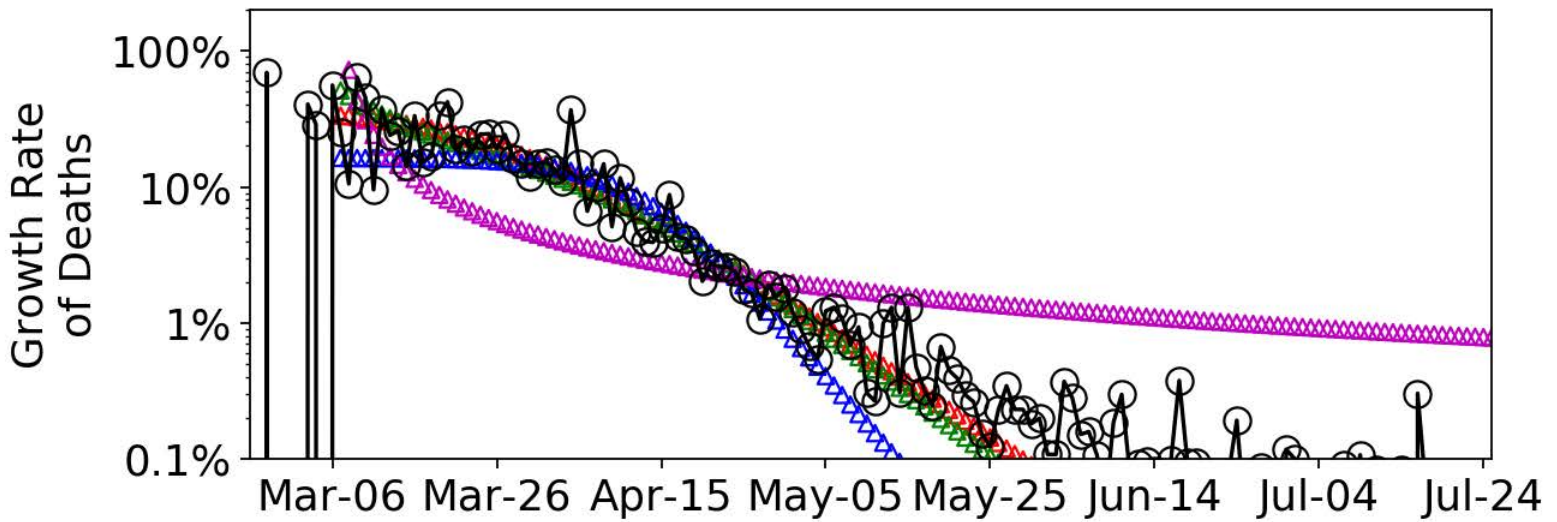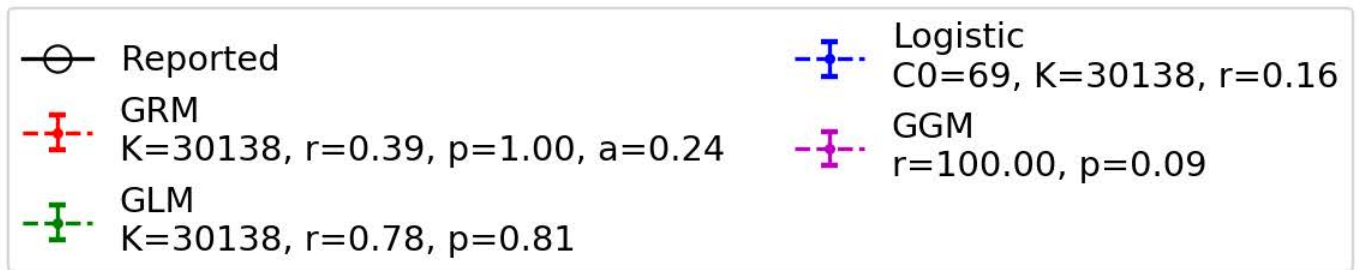



# Argentina

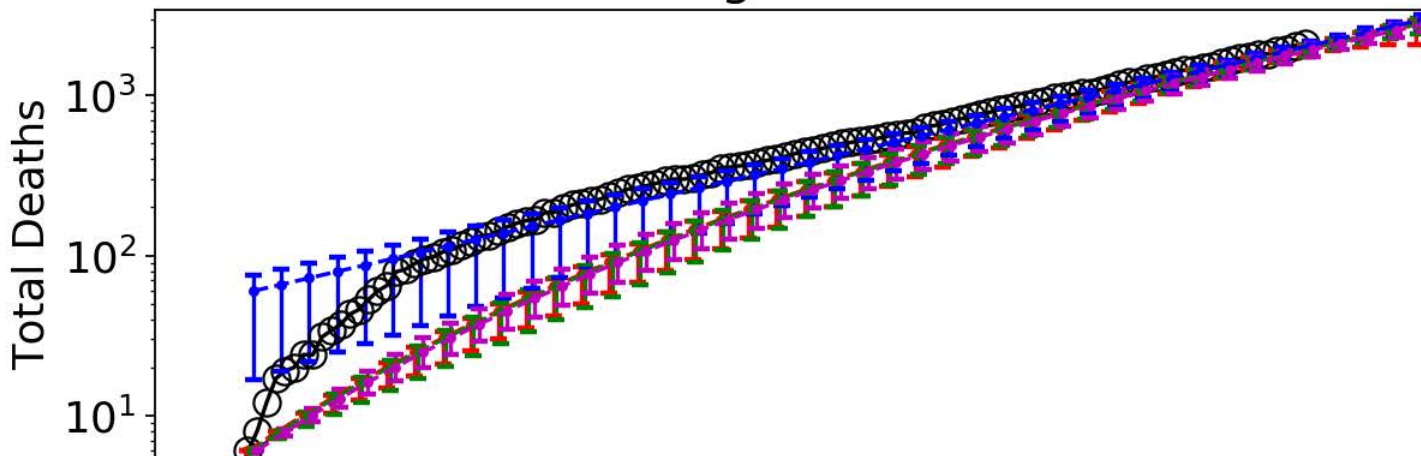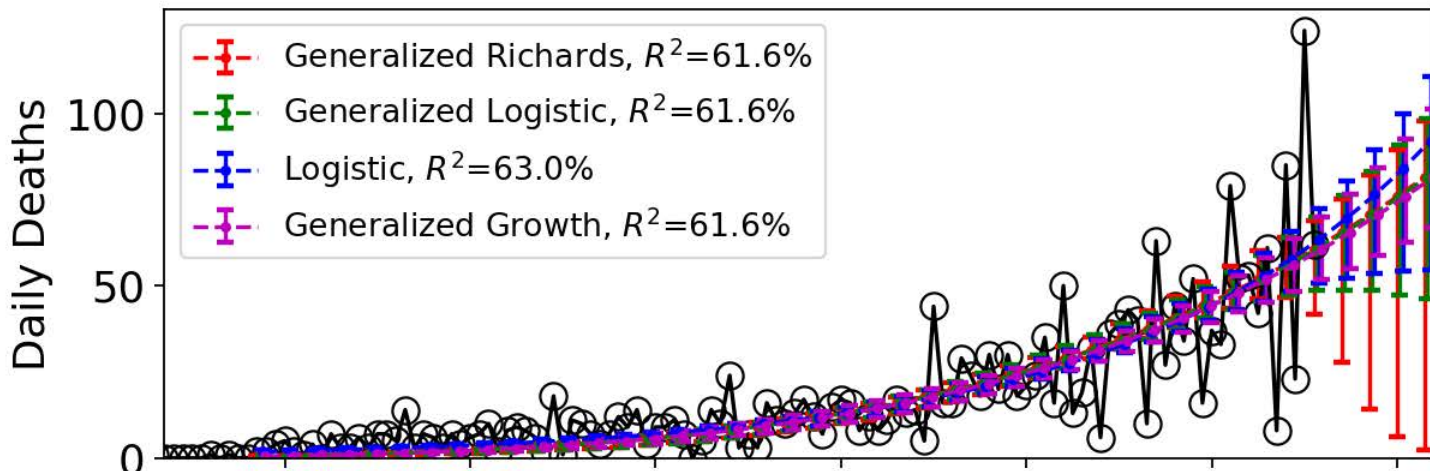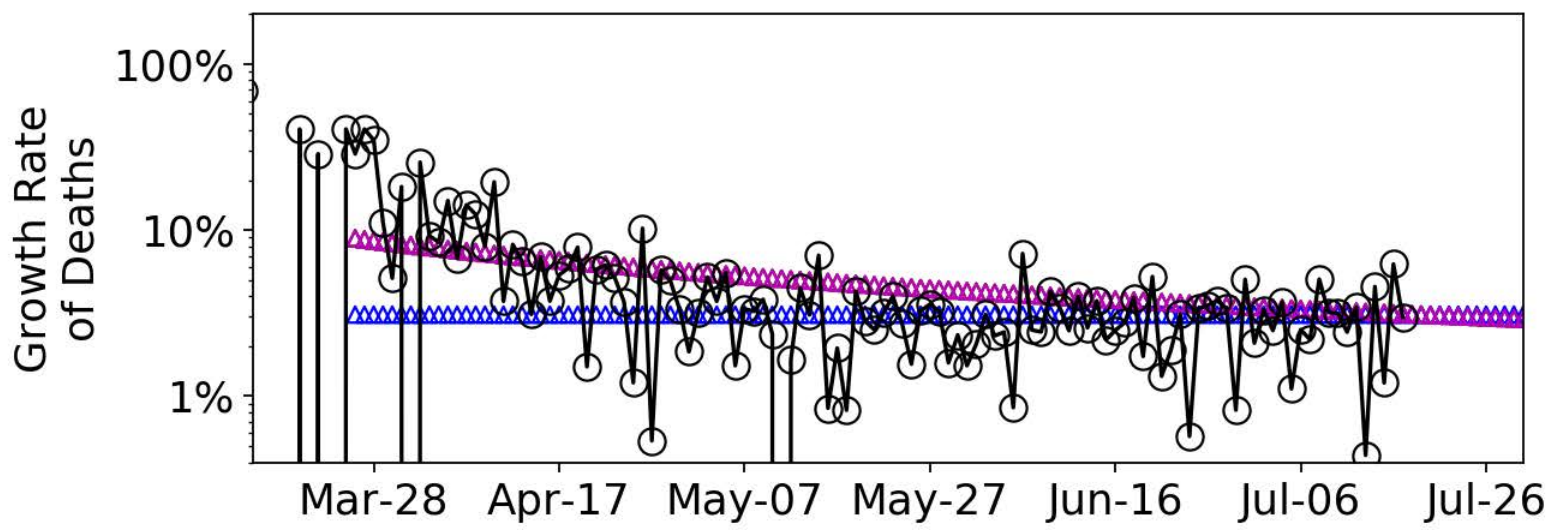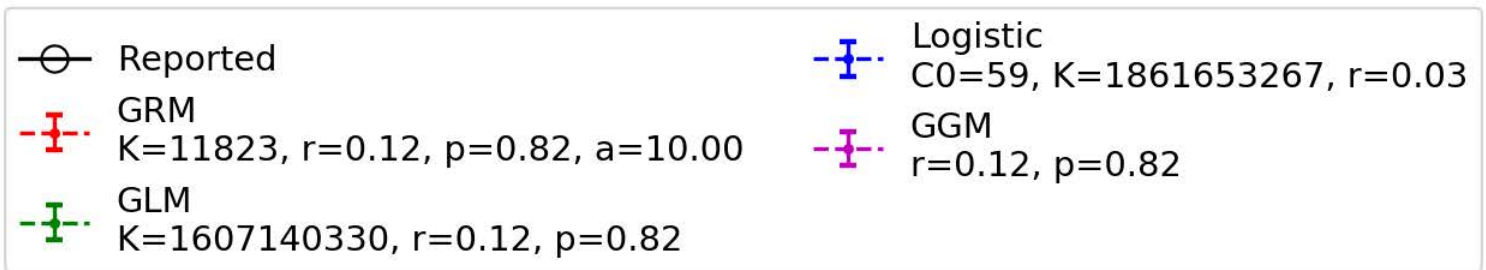

# Canada

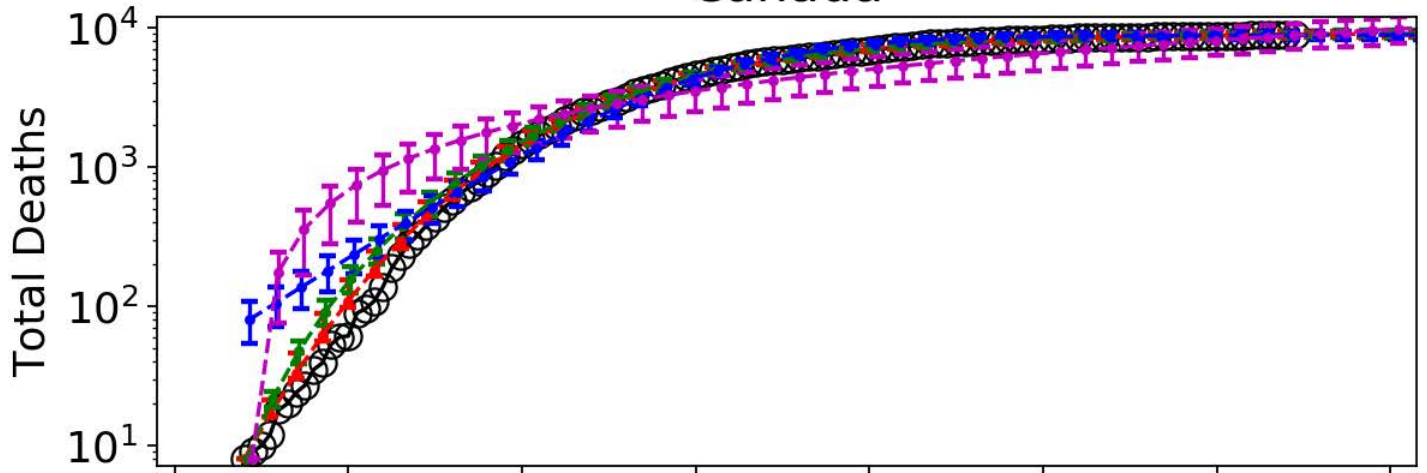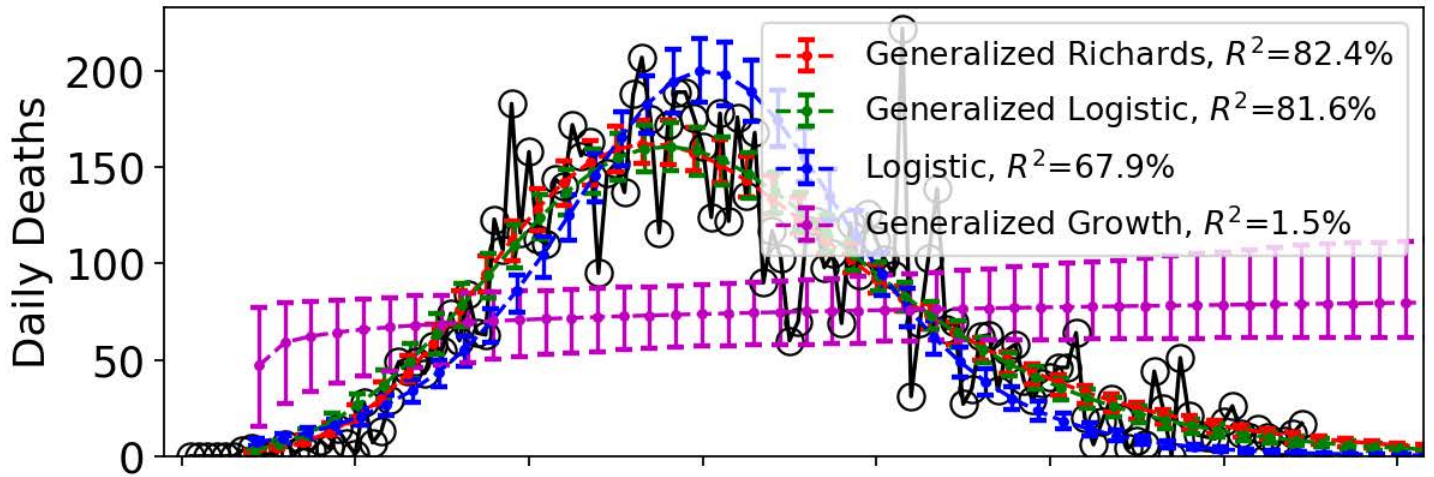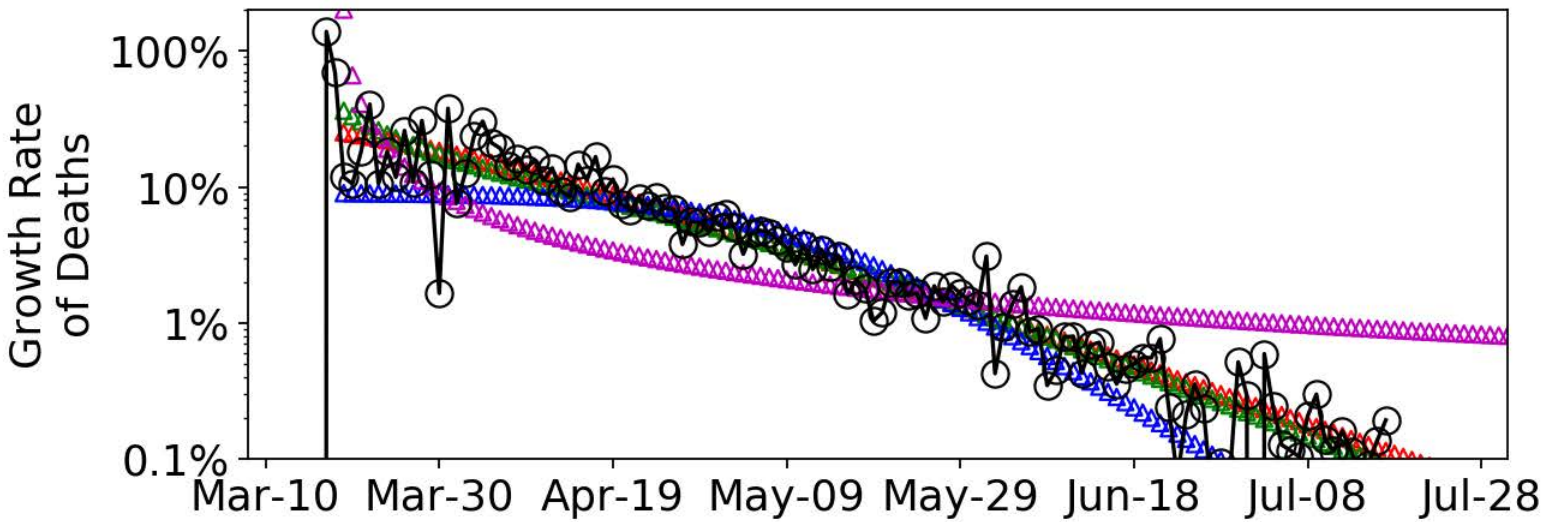

○ Reported

- - GRM

K=9116,  $r=0.50$ ,  $p=1.00$ ,  $a=0.10$

- - GLM

K=9053,  $r=0.67$ ,  $p=0.73$

- - Logistic

$C_0=79$ ,  $K=8827$ ,  $r=0.09$

- - GGM

$r=40.26$ ,  $p=0.07$

# Iraq

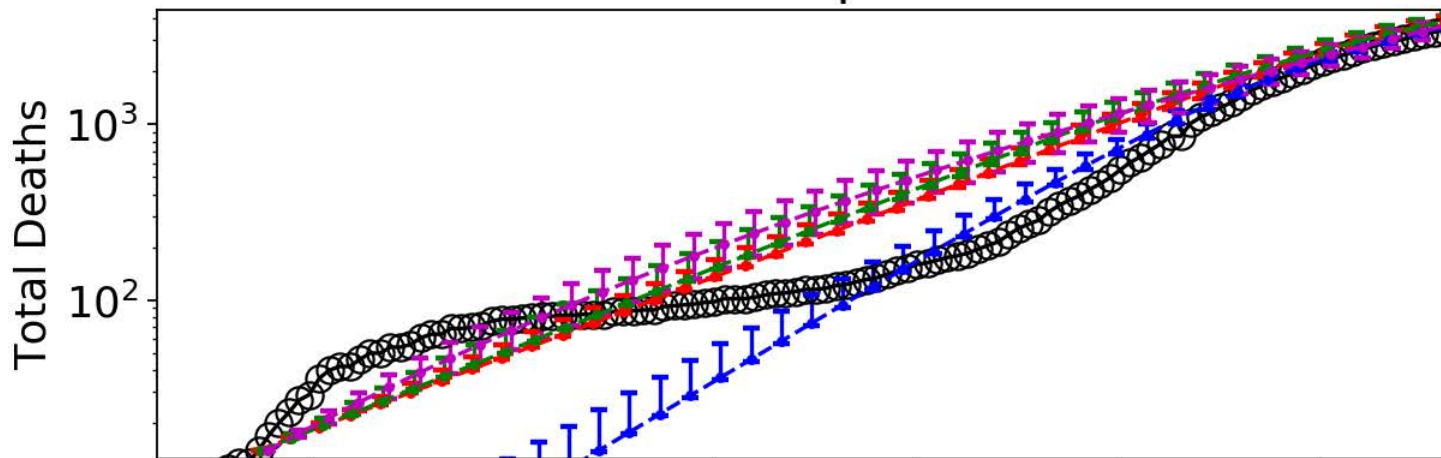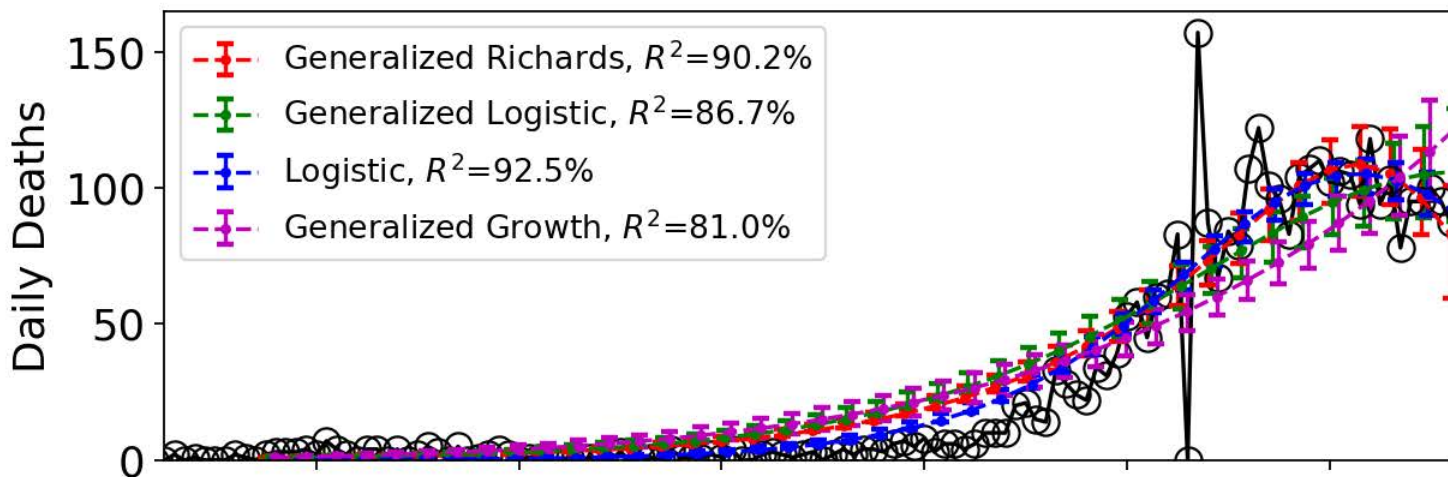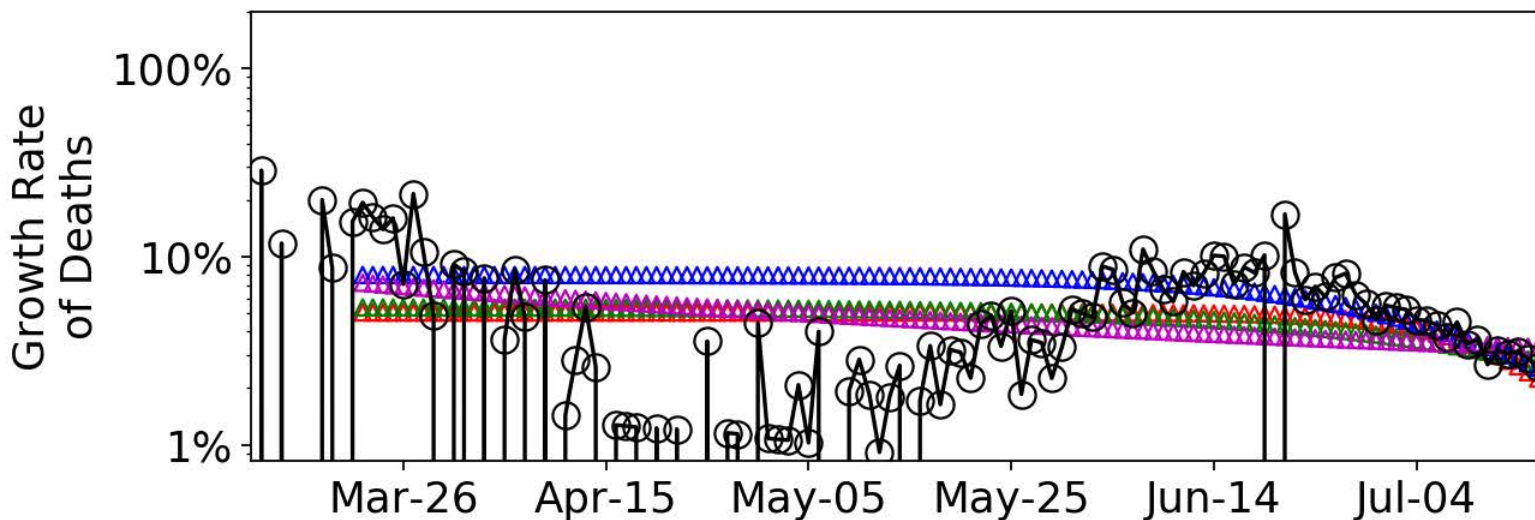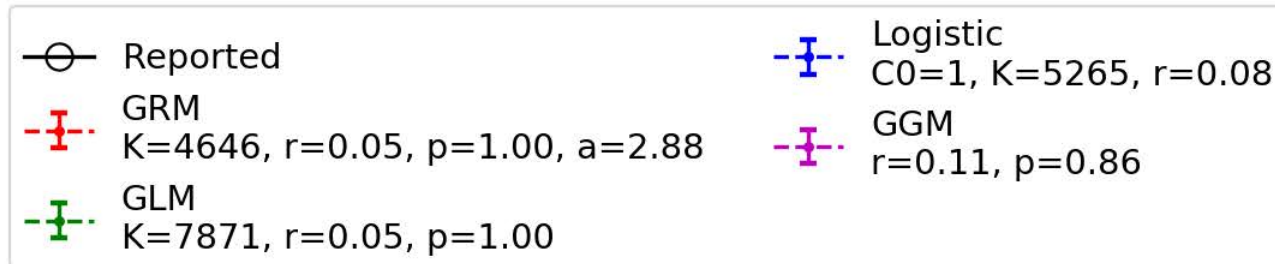



# Sweden

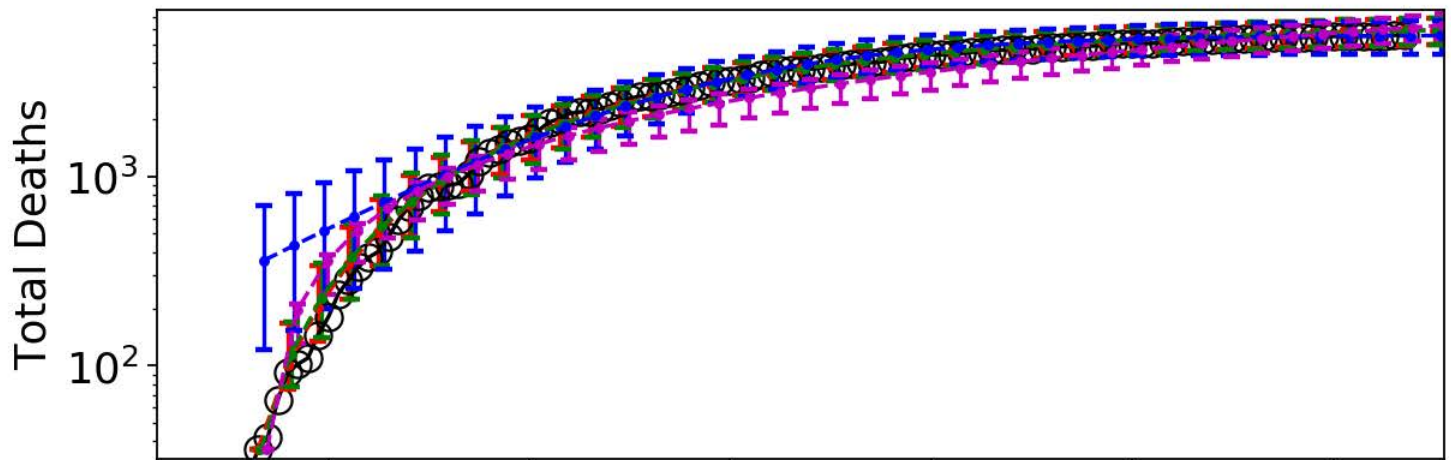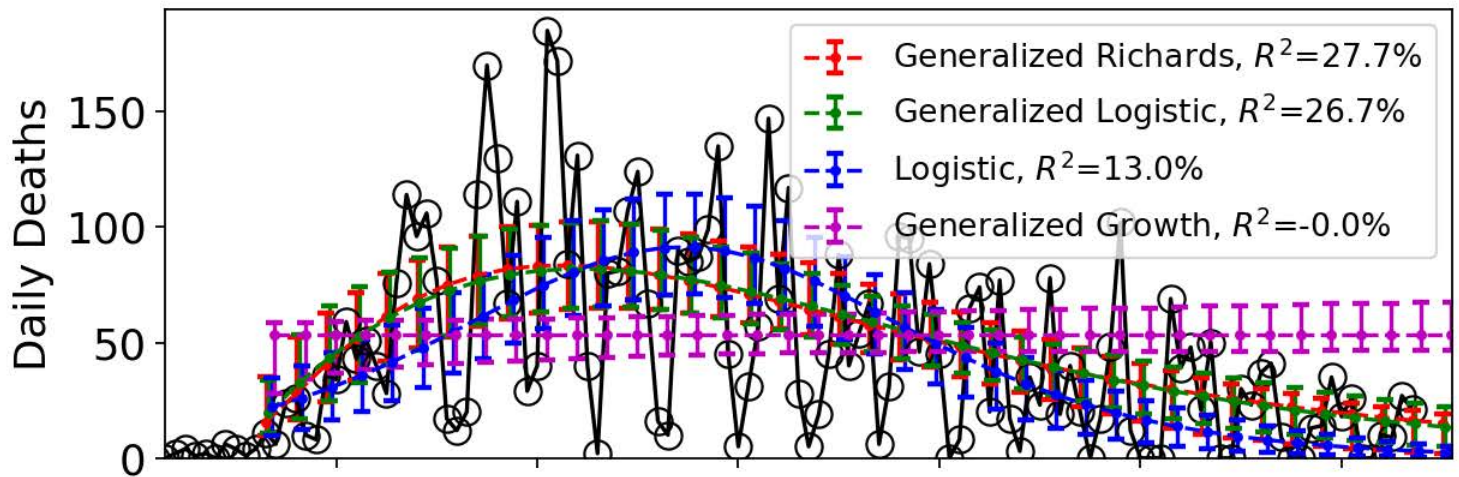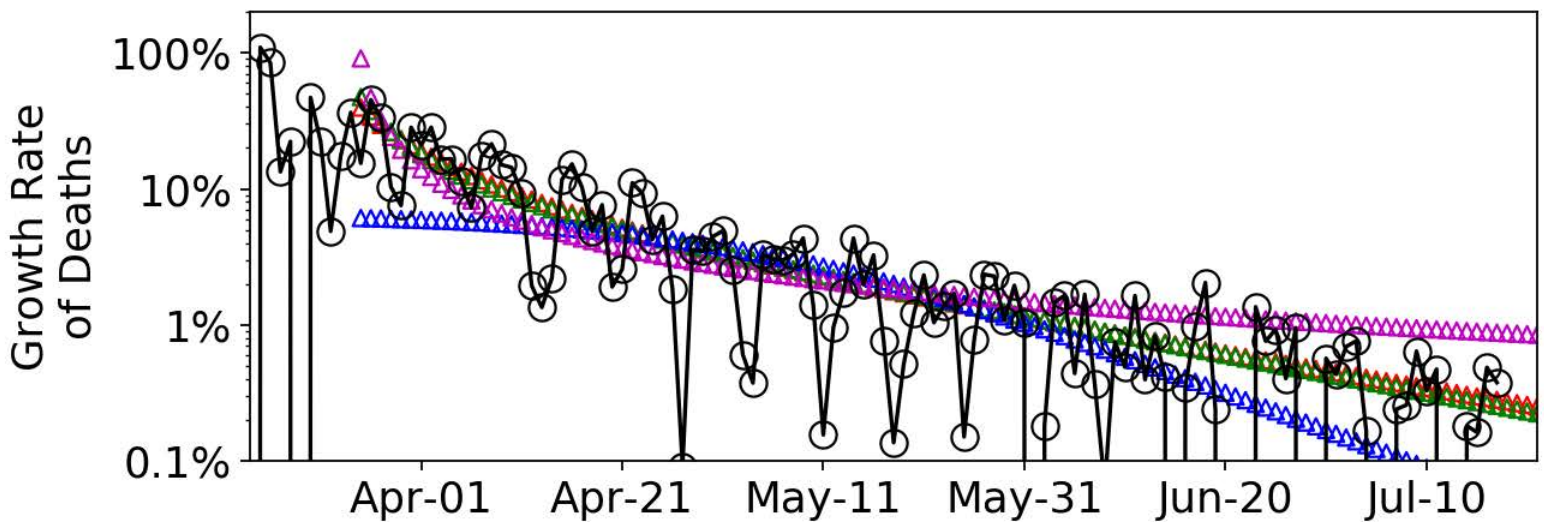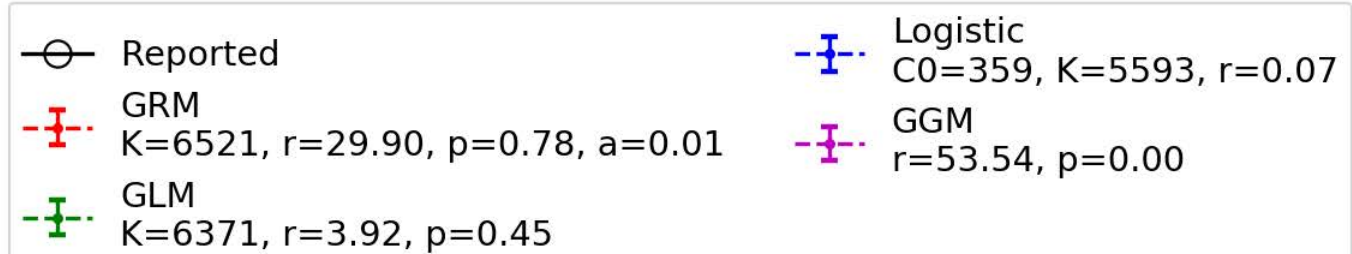

# Belgium

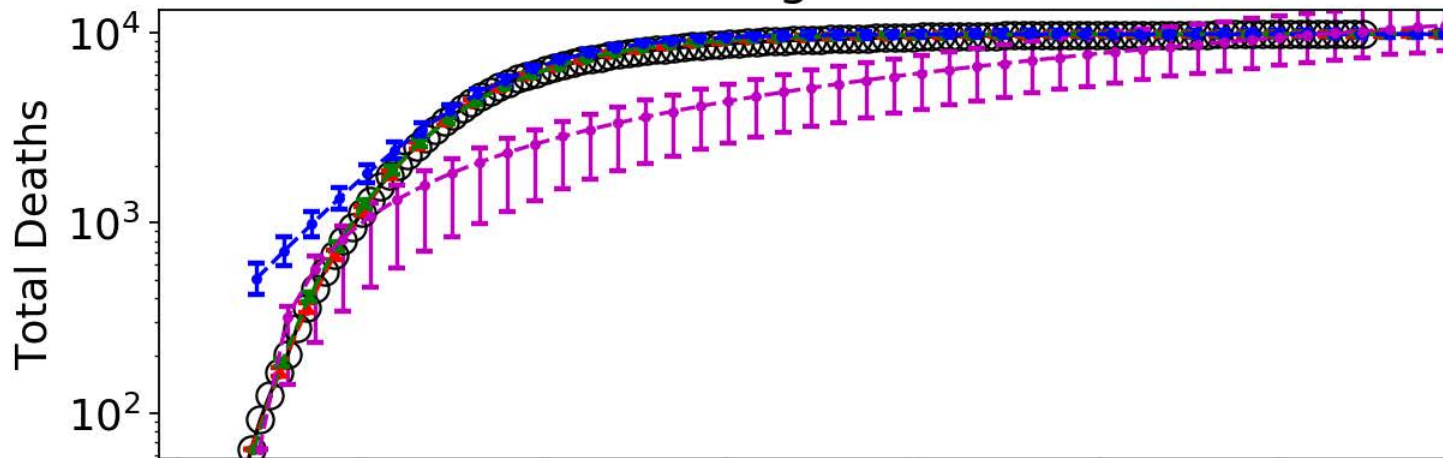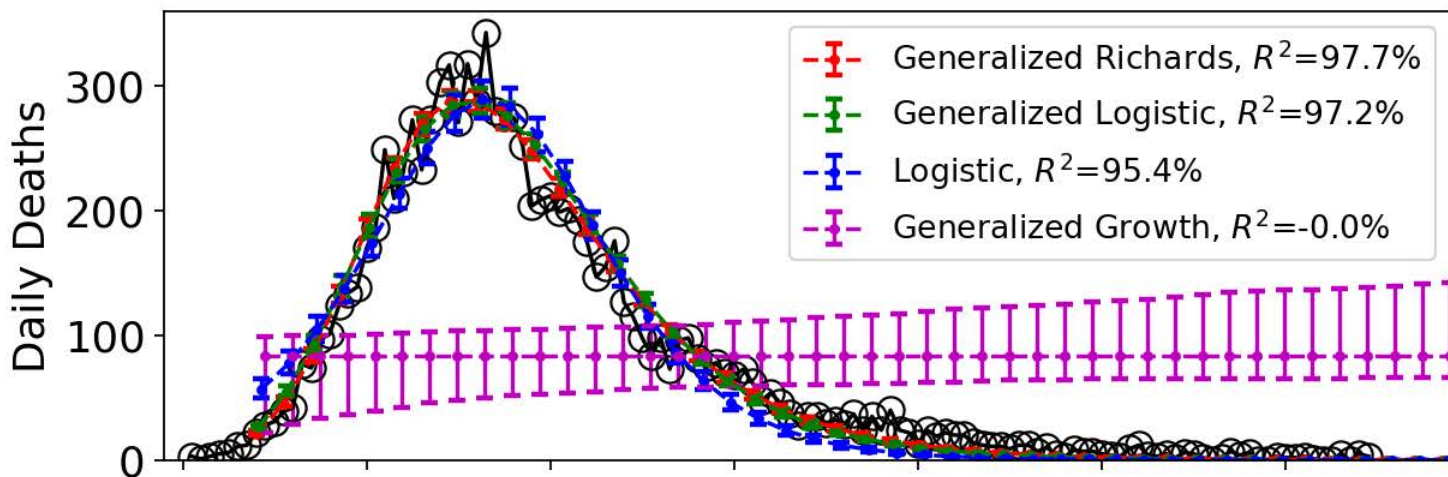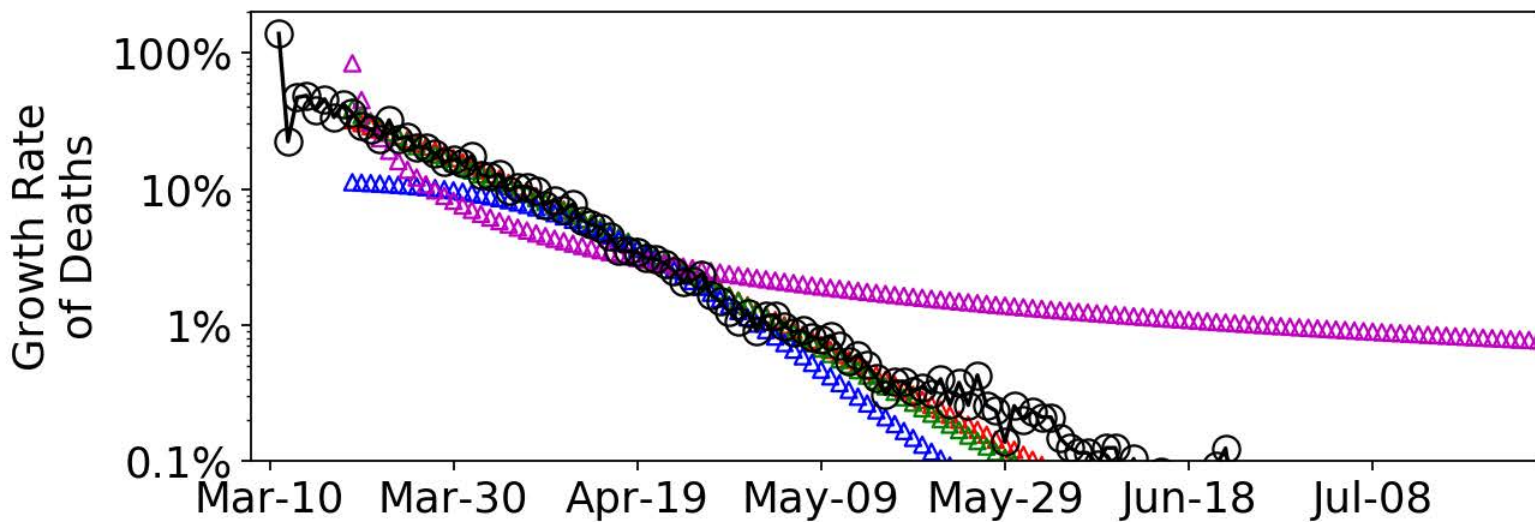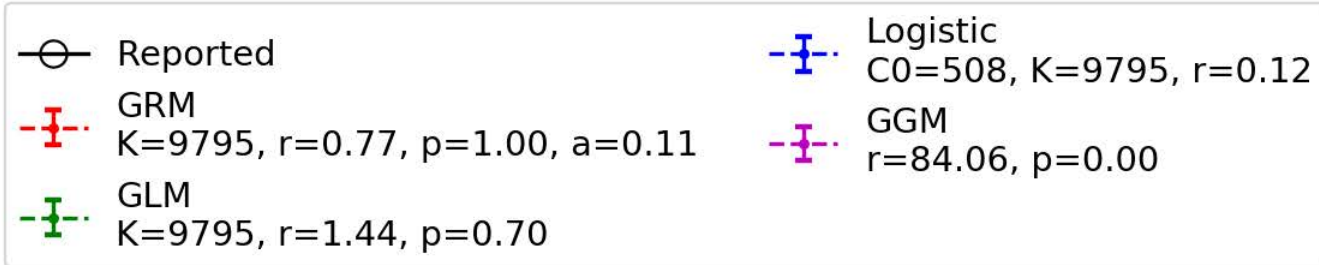

# Bolivia

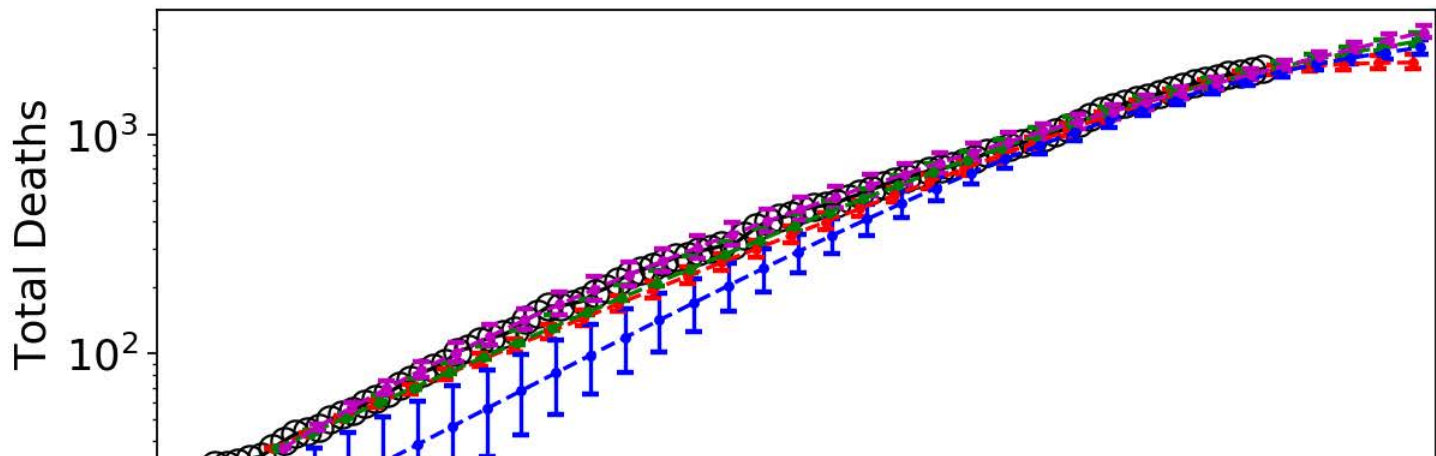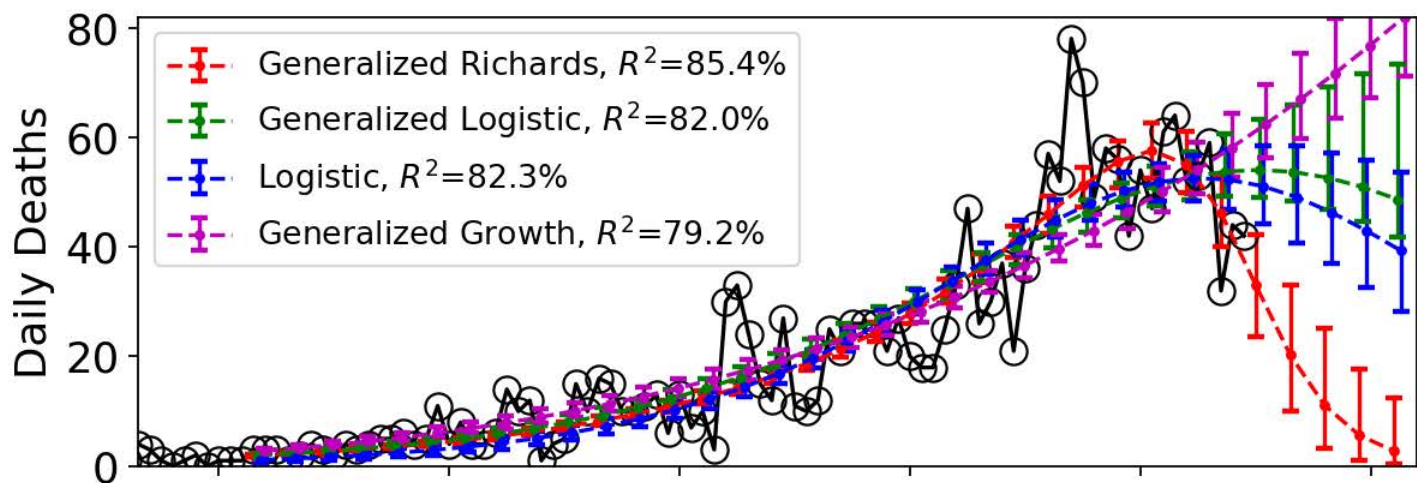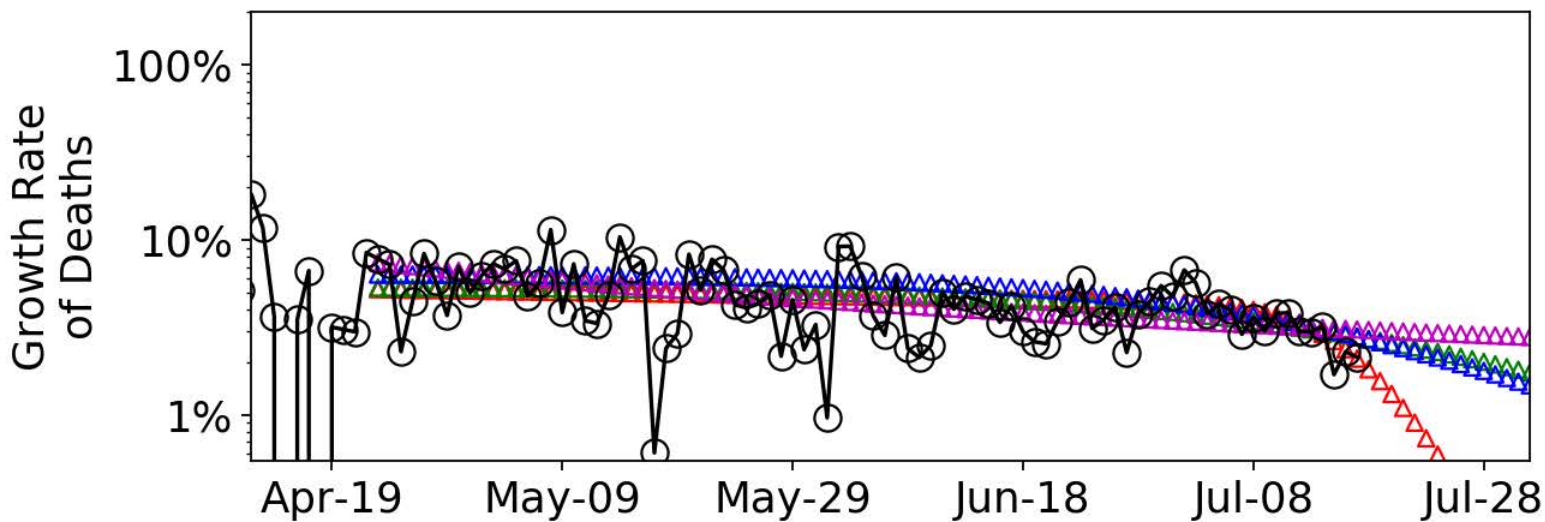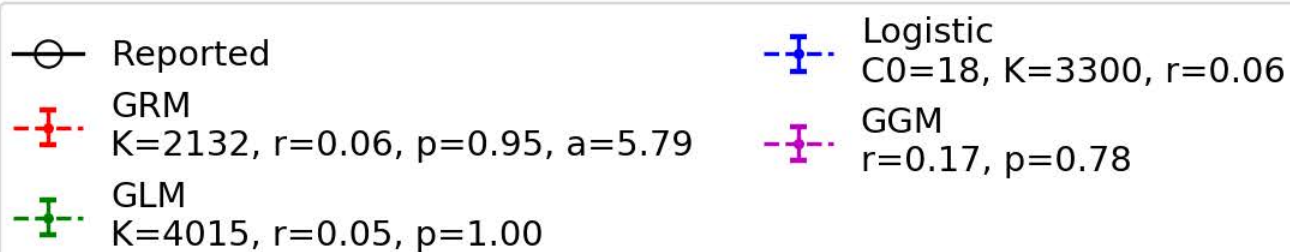



# Netherlands

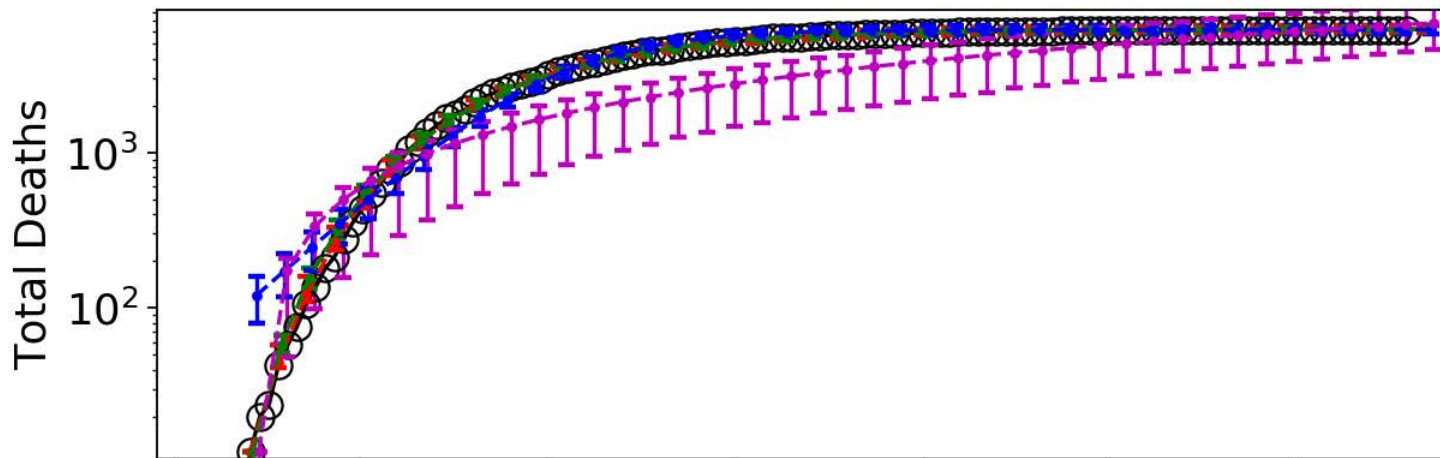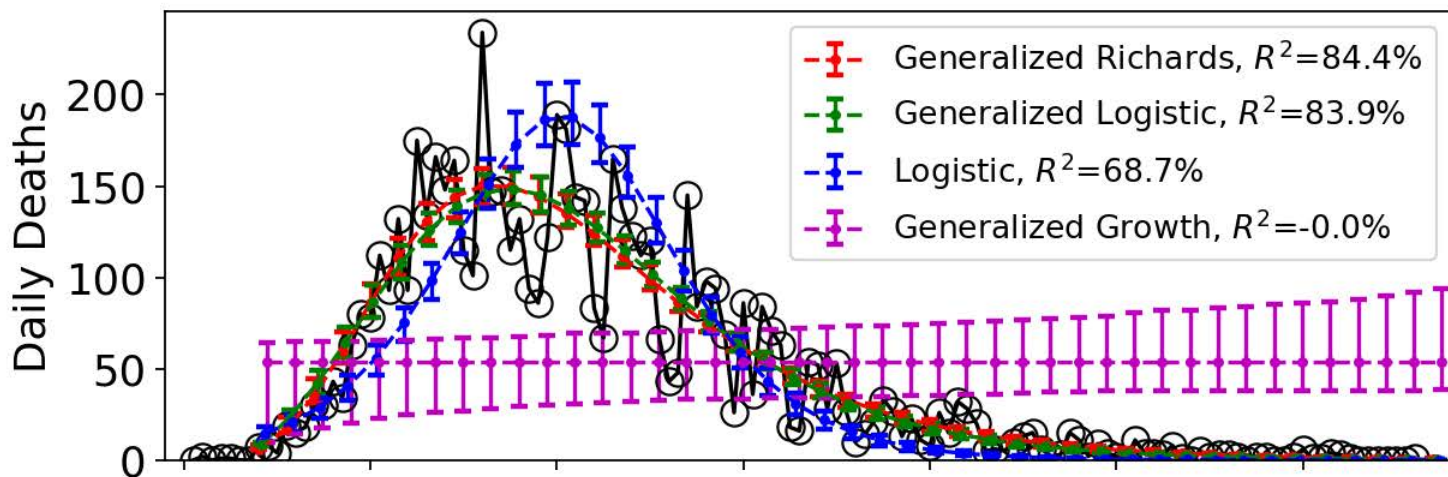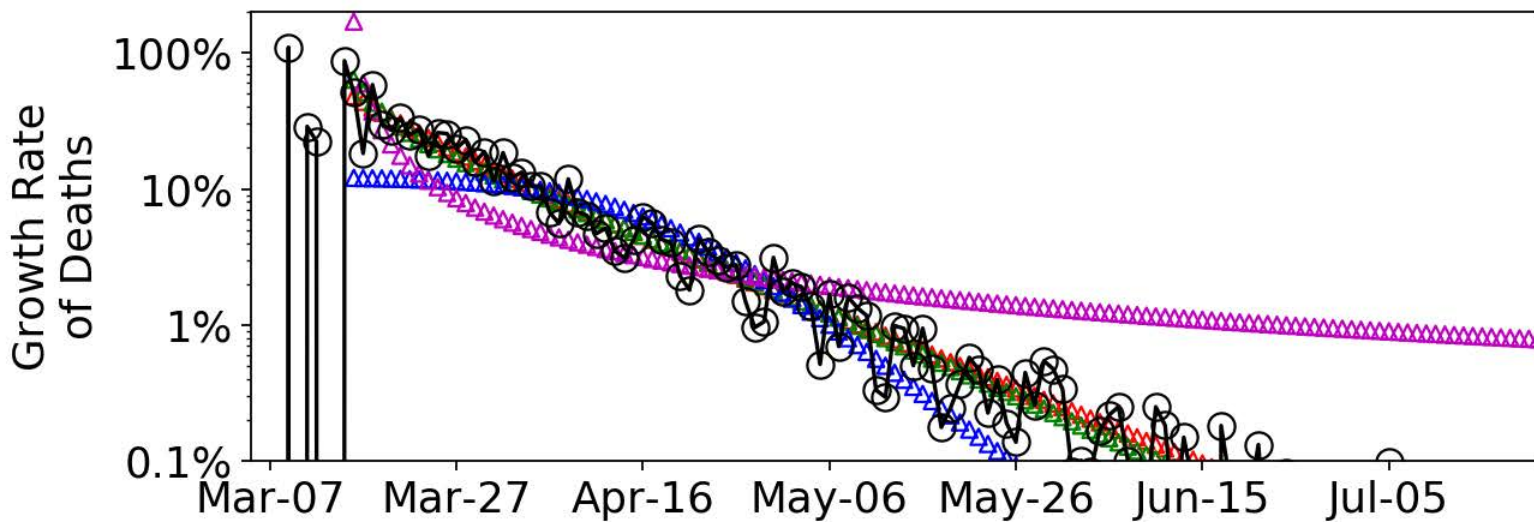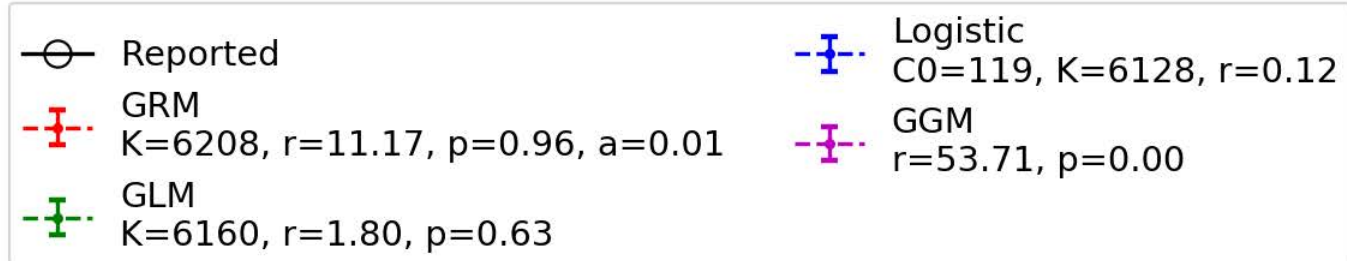

# Panama

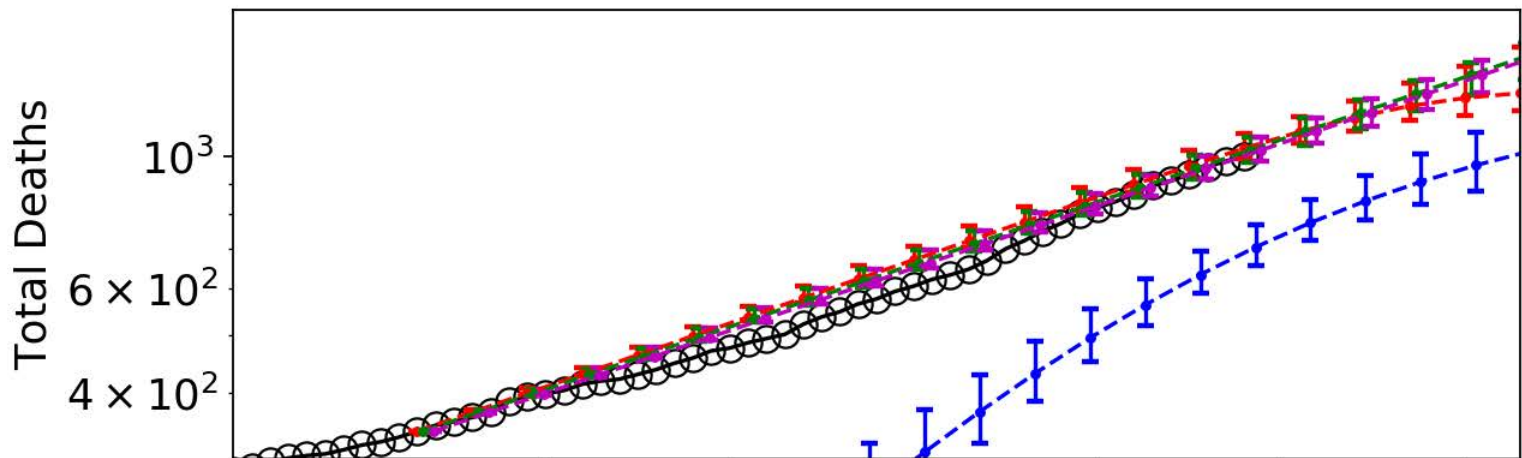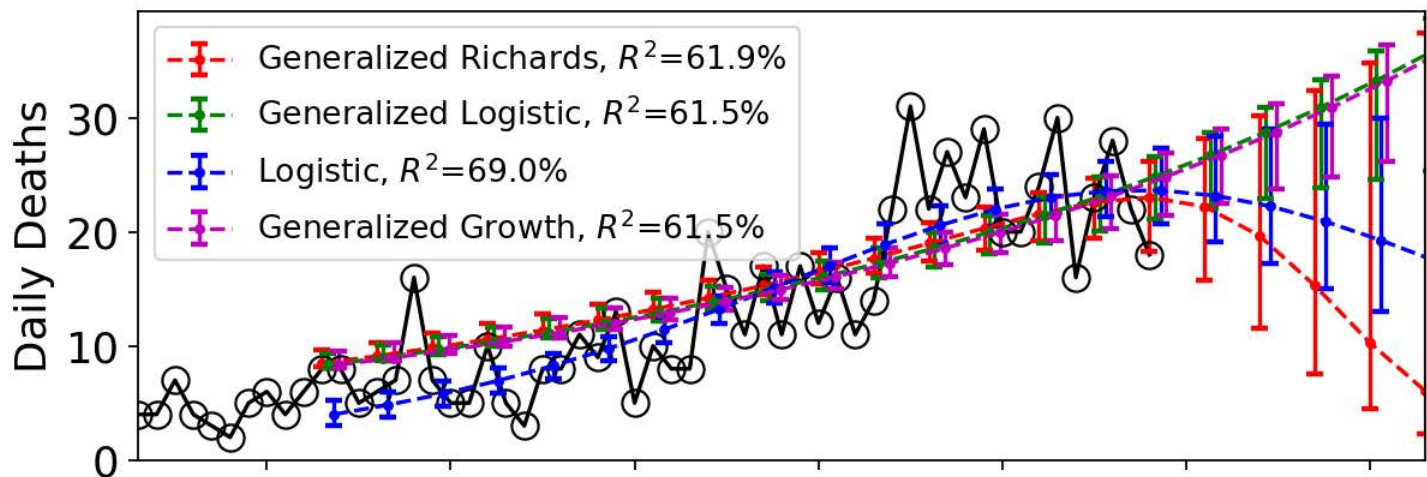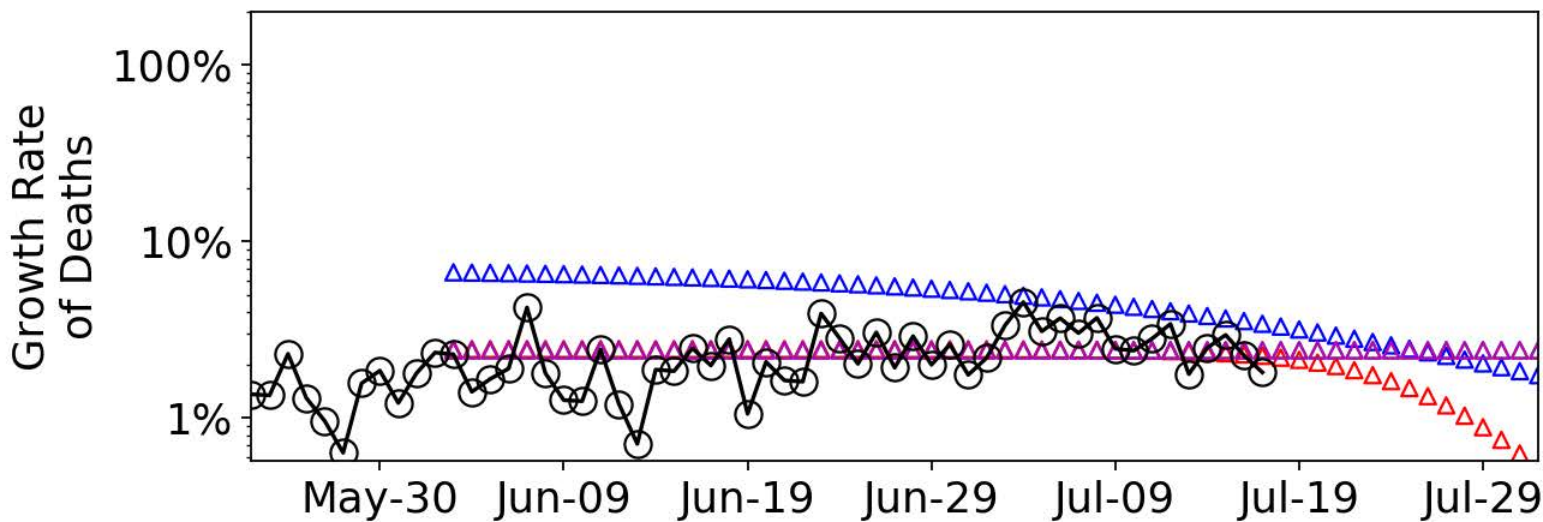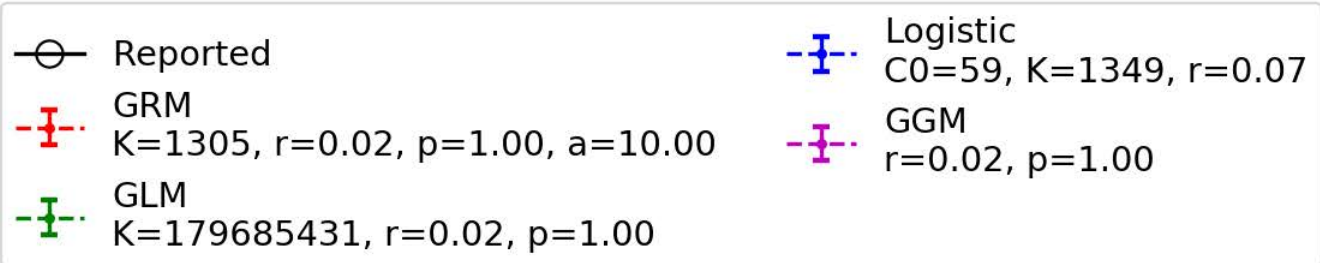

# Portugal

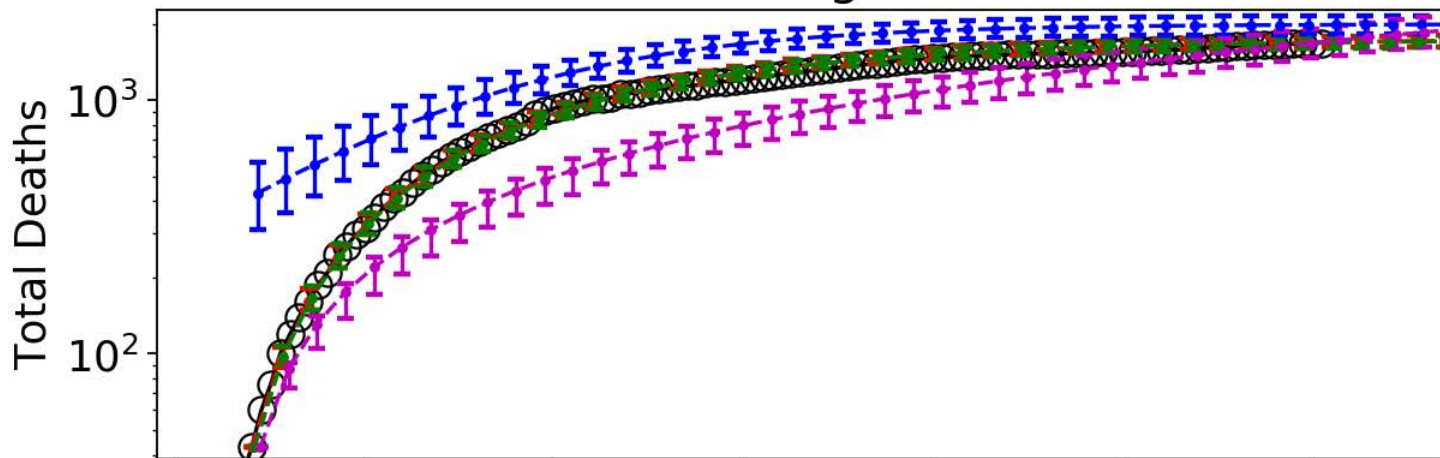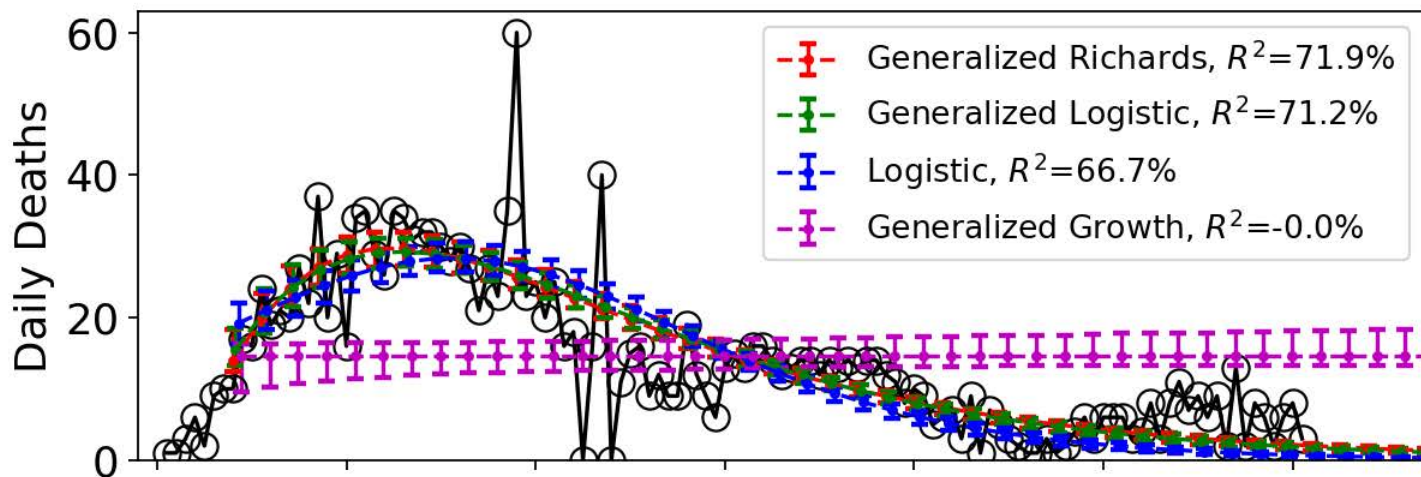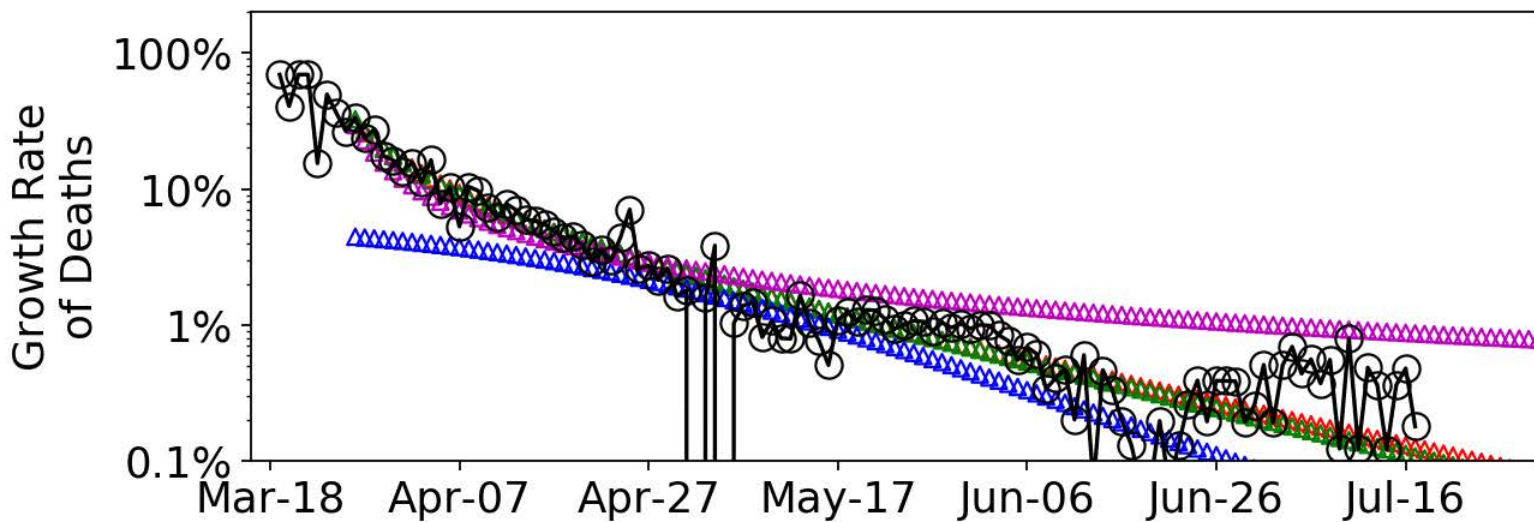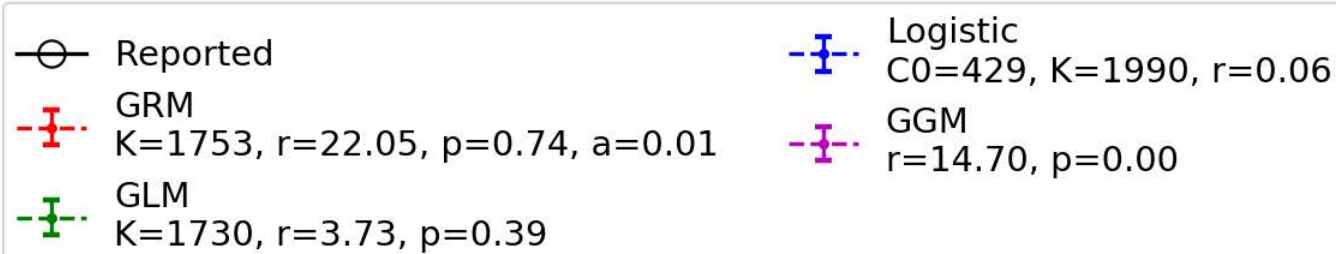



# Israel

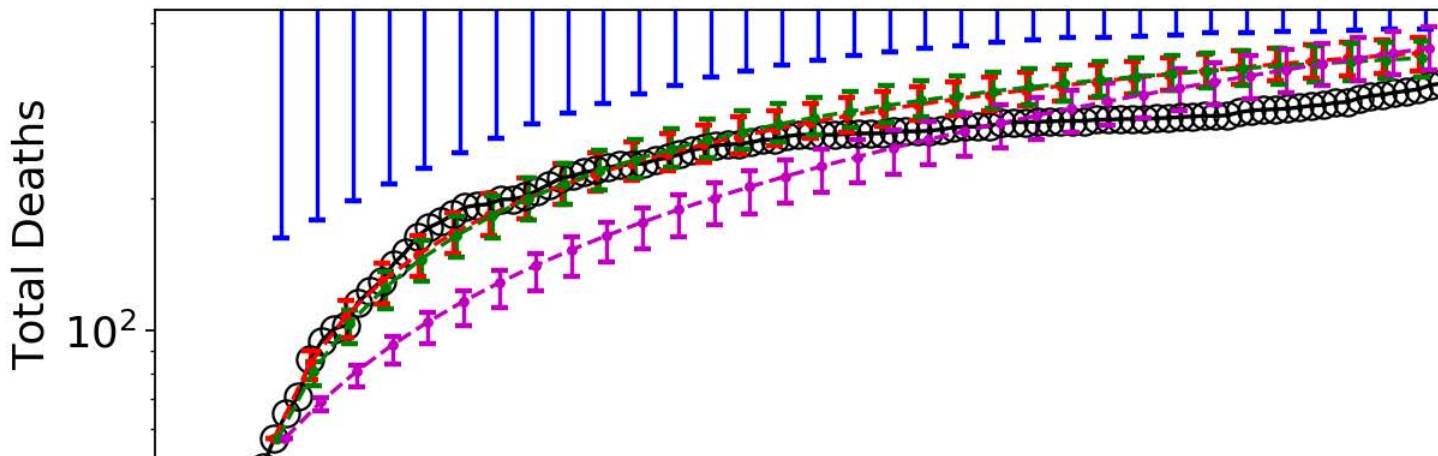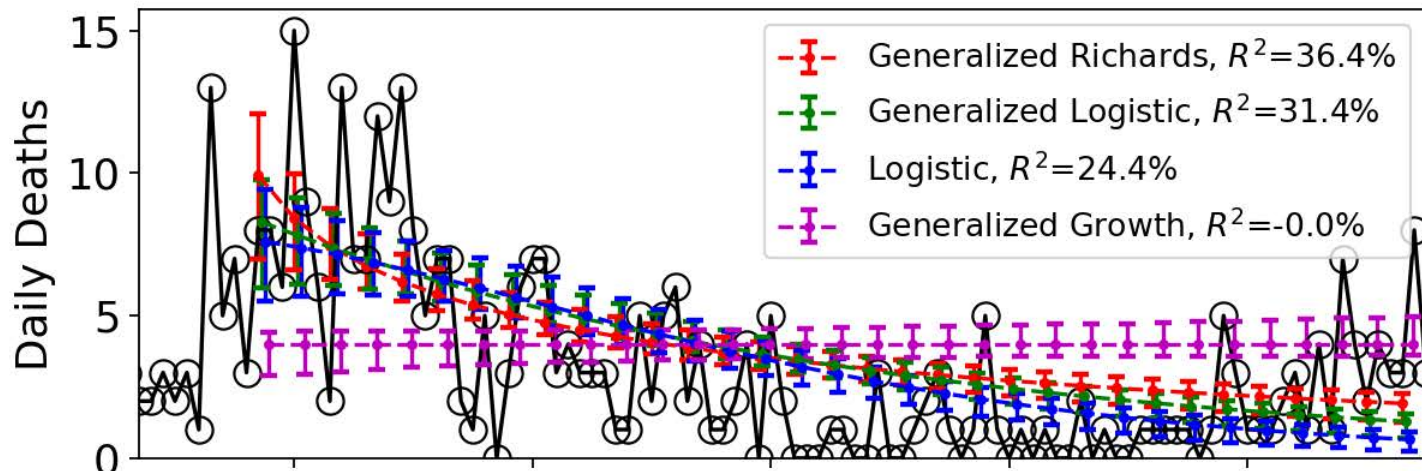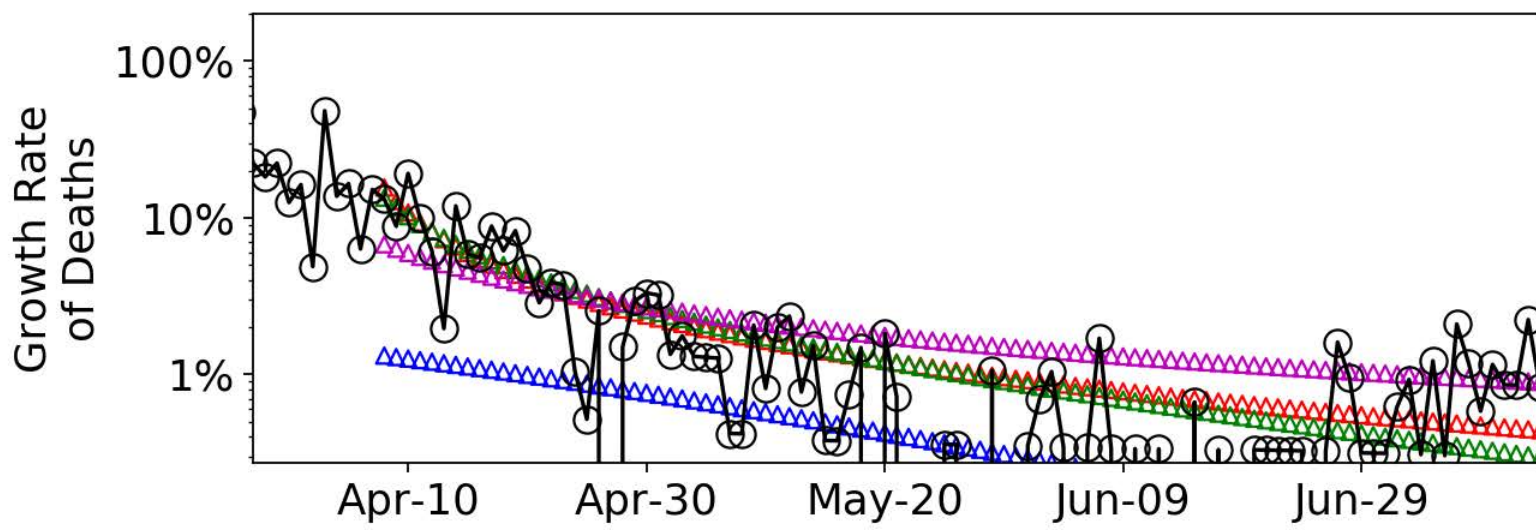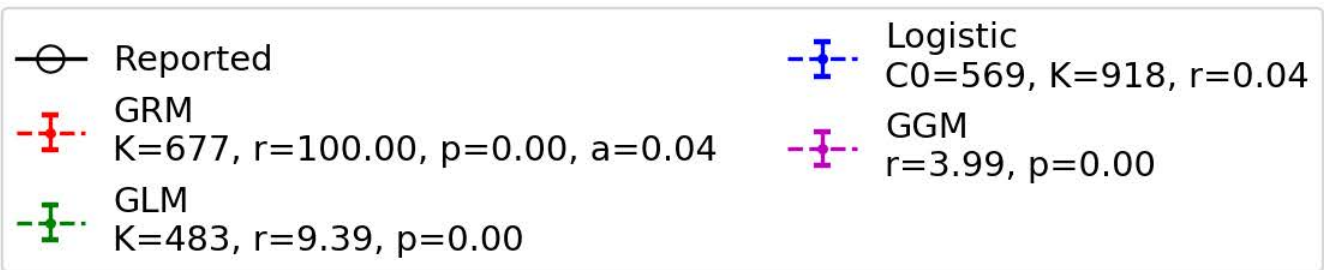

# Afghanistan

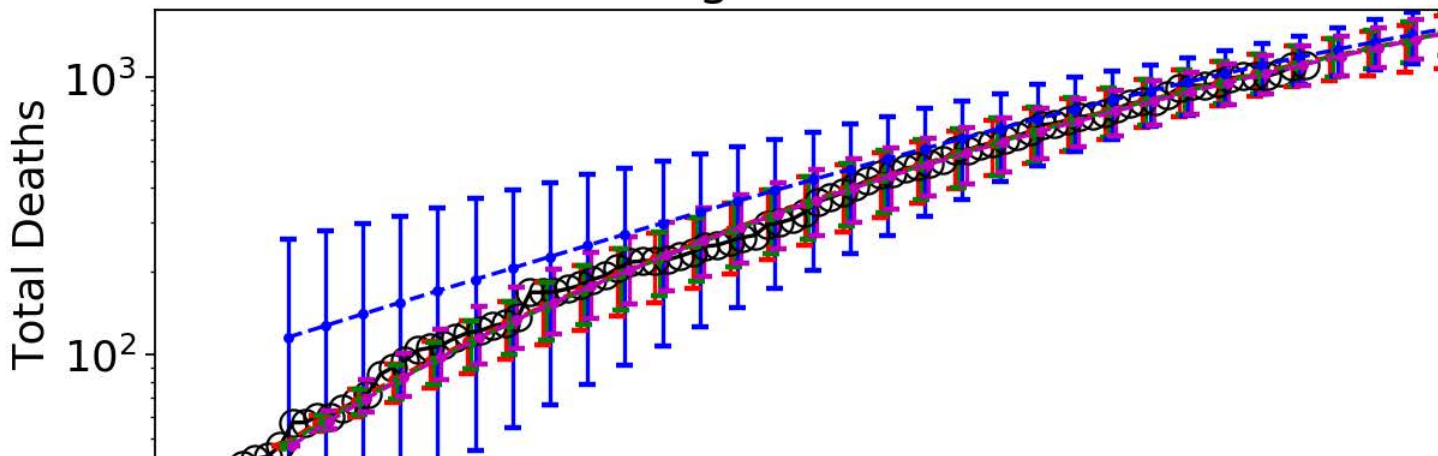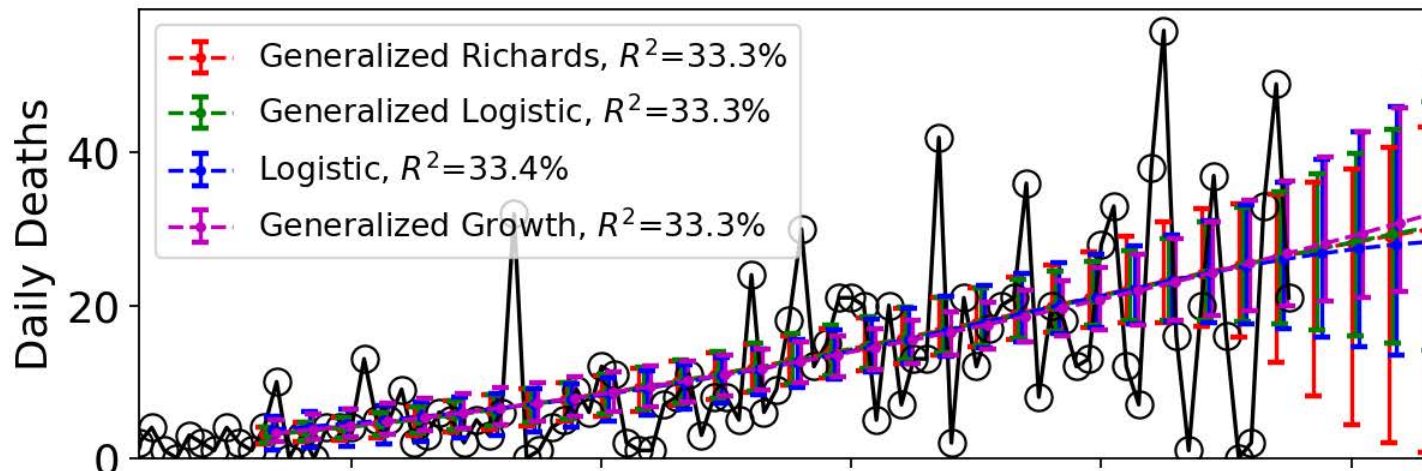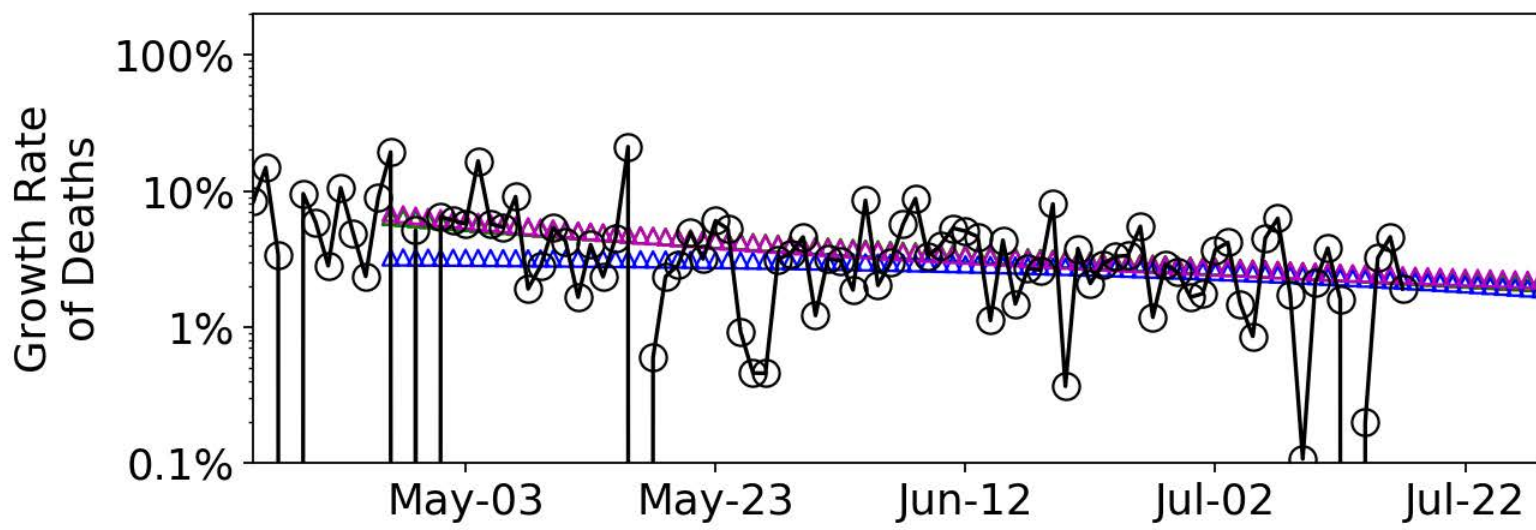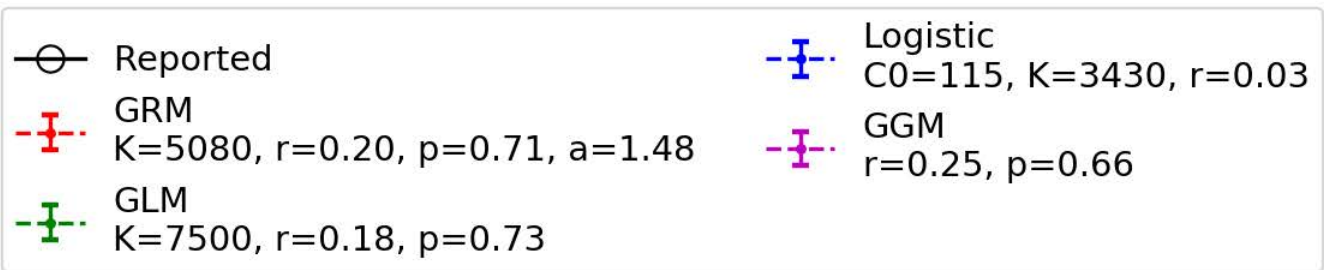



# Nigeria

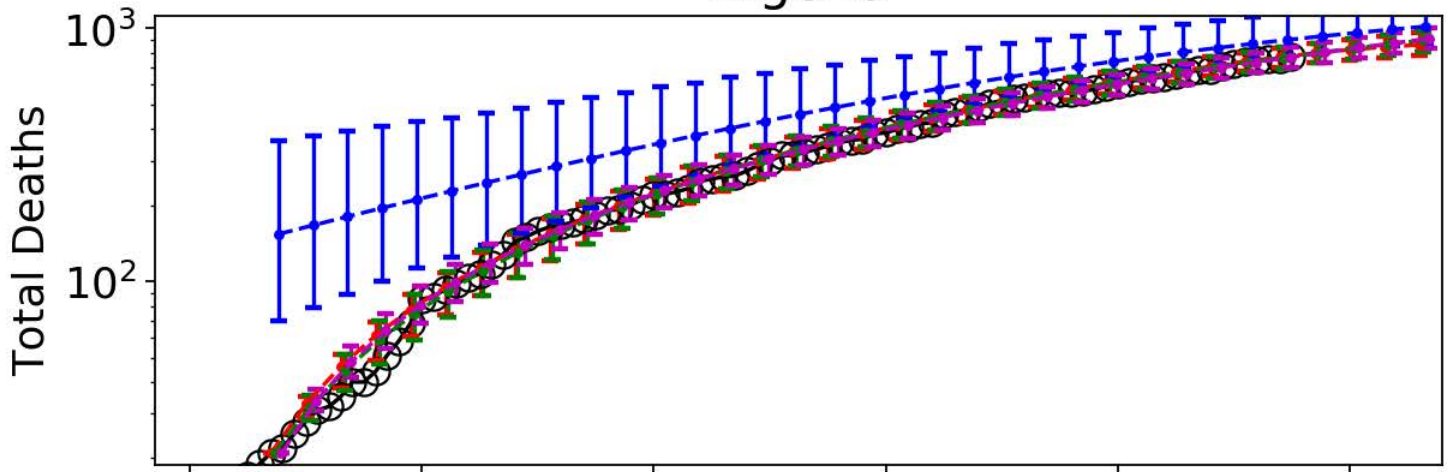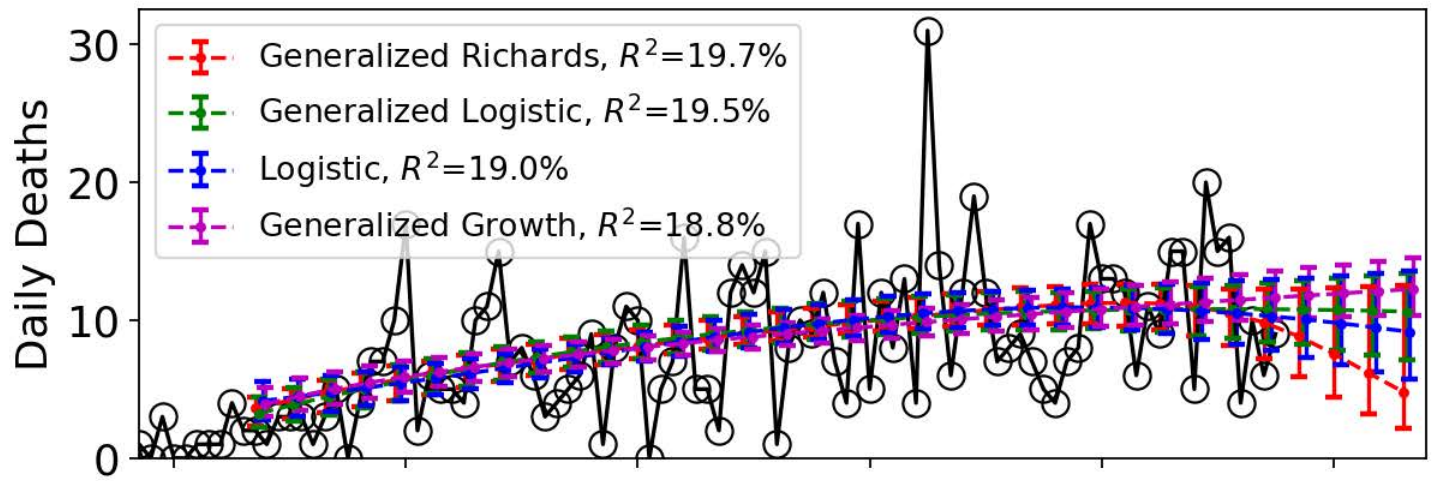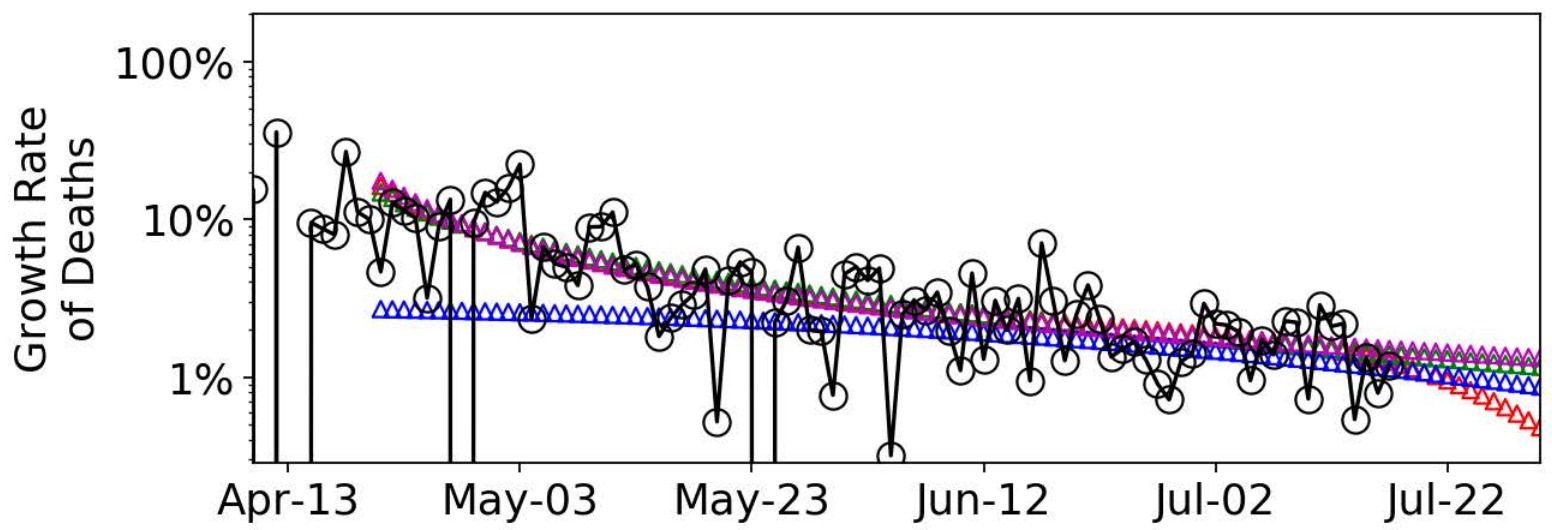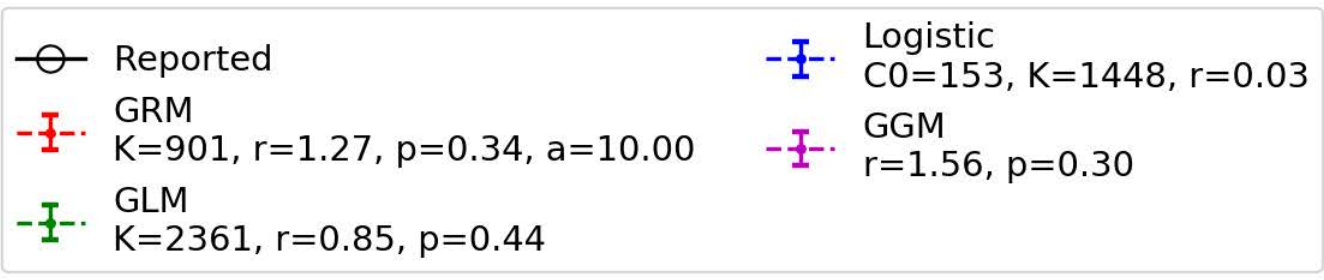



# Armenia

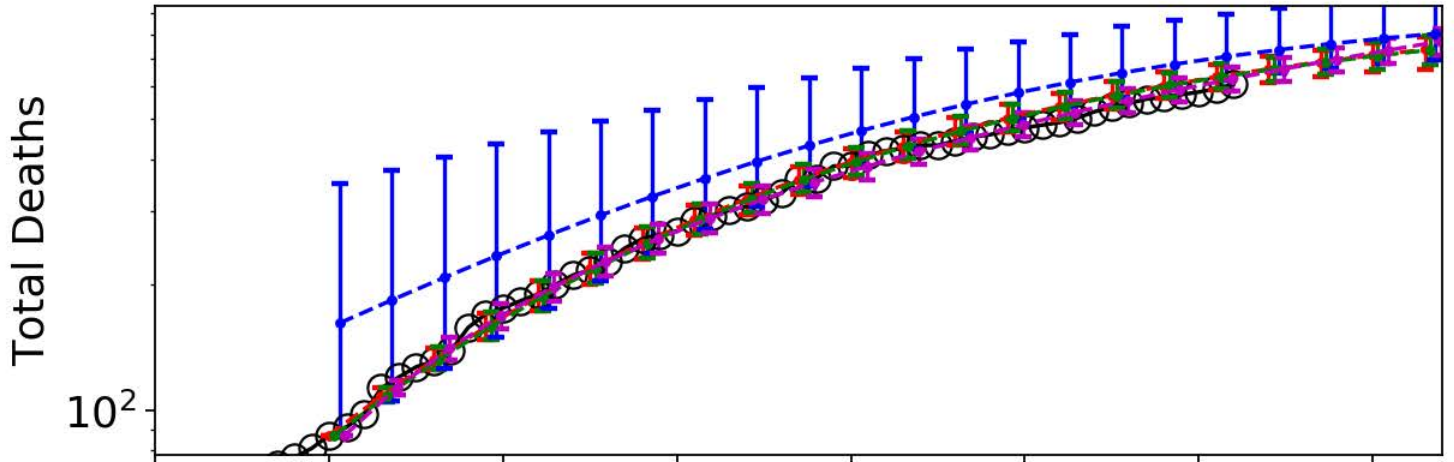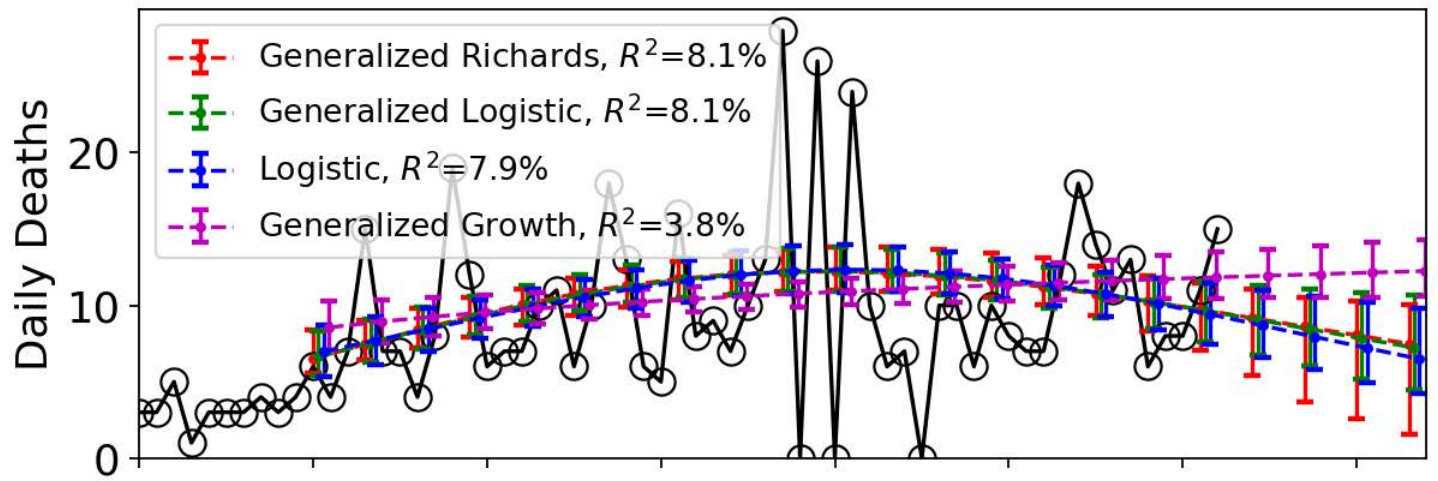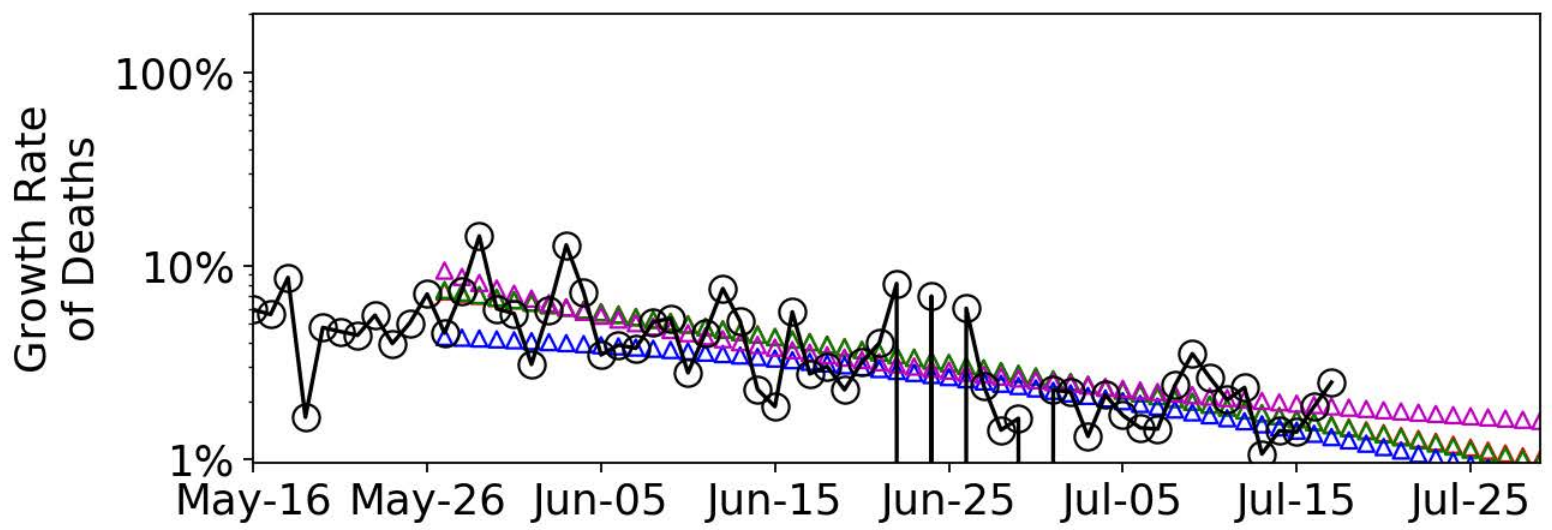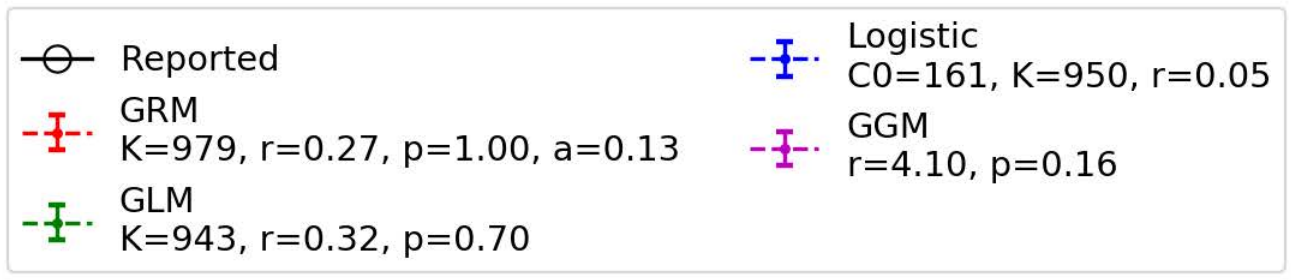

# Switzerland

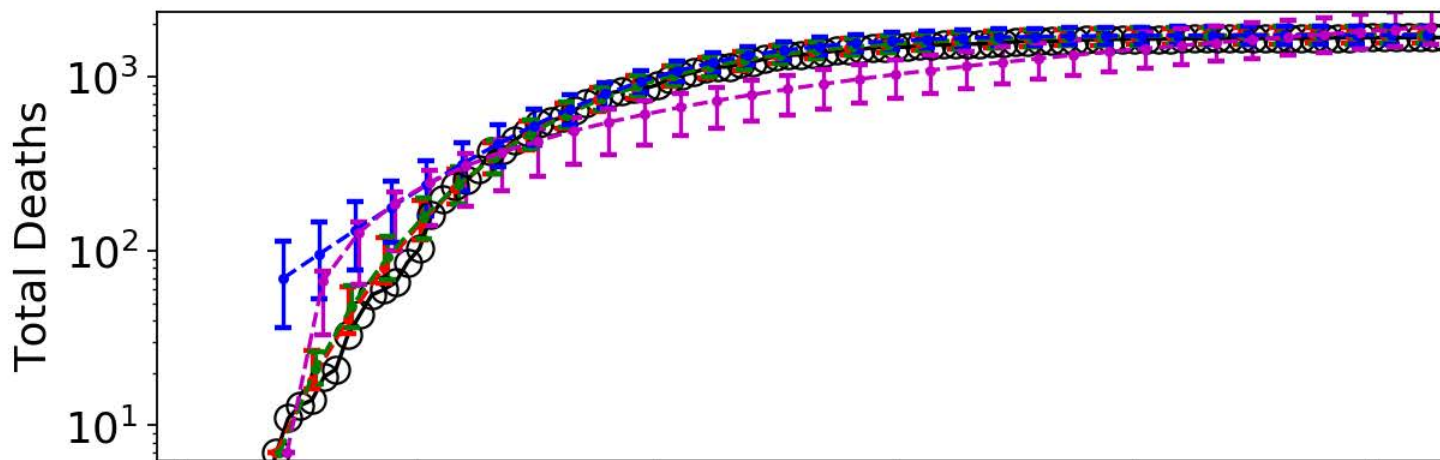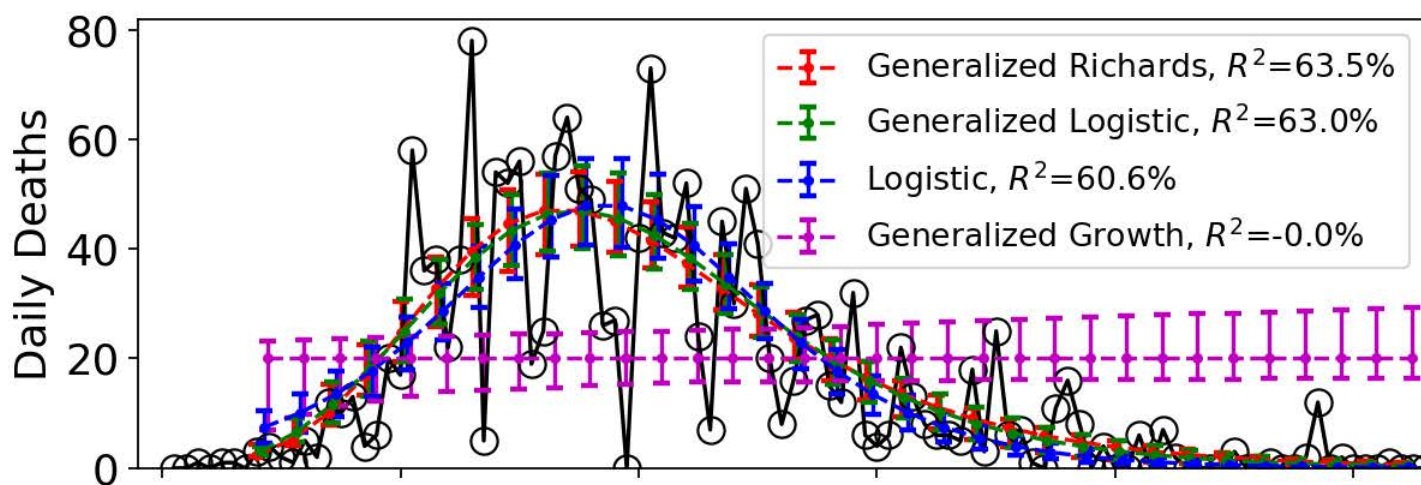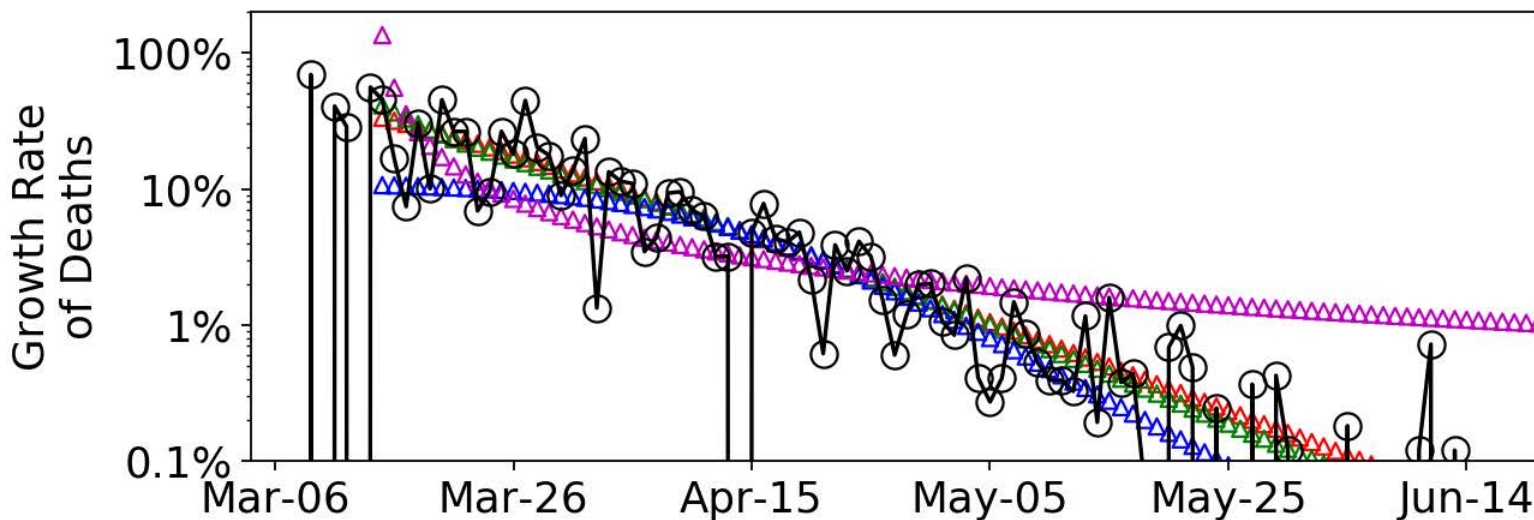

○ Reported

GRM

$K=1763$ ,  $r=1.00$ ,  $p=1.00$ ,  $a=0.08$

GLM

$K=1743$ ,  $r=0.78$ ,  $p=0.70$

Logistic

$C_0=69$ ,  $K=1733$ ,  $r=0.11$

GGM

$r=20.04$ ,  $p=0.00$

# Guatemala

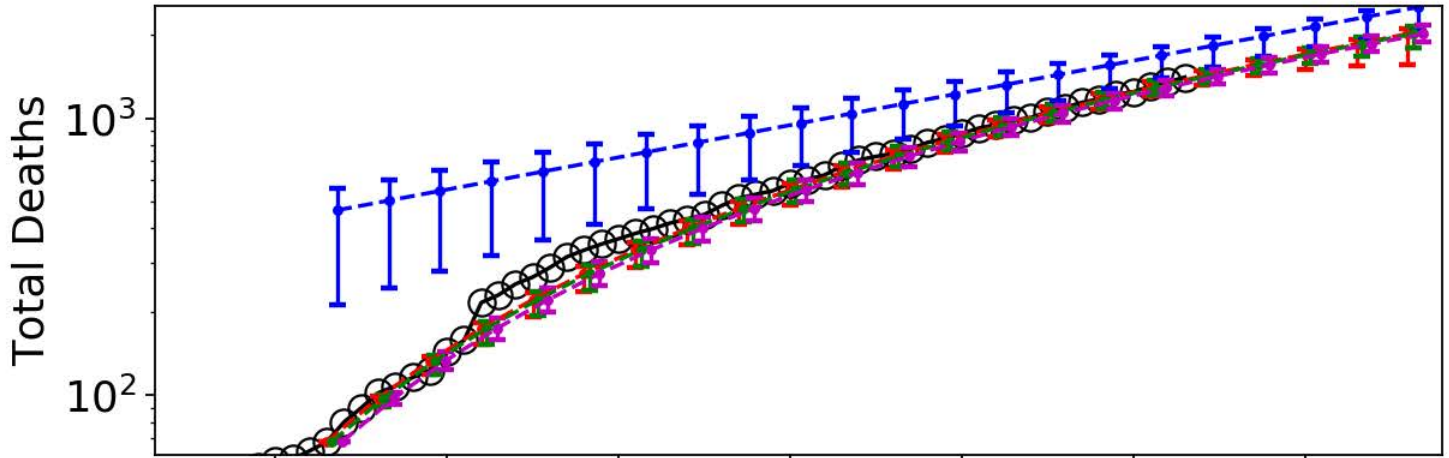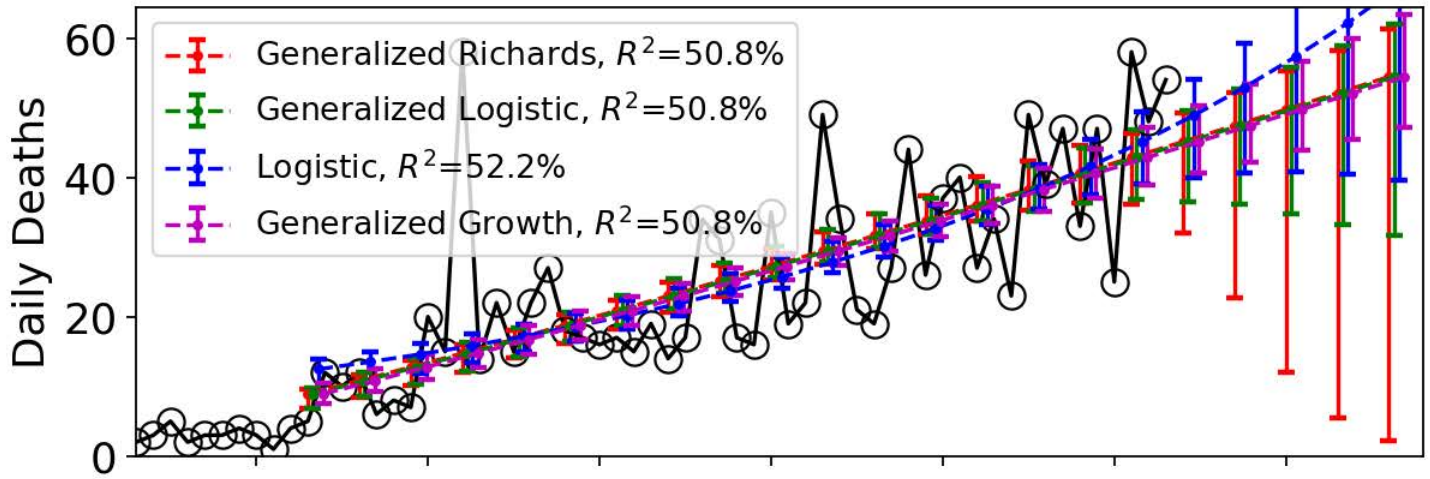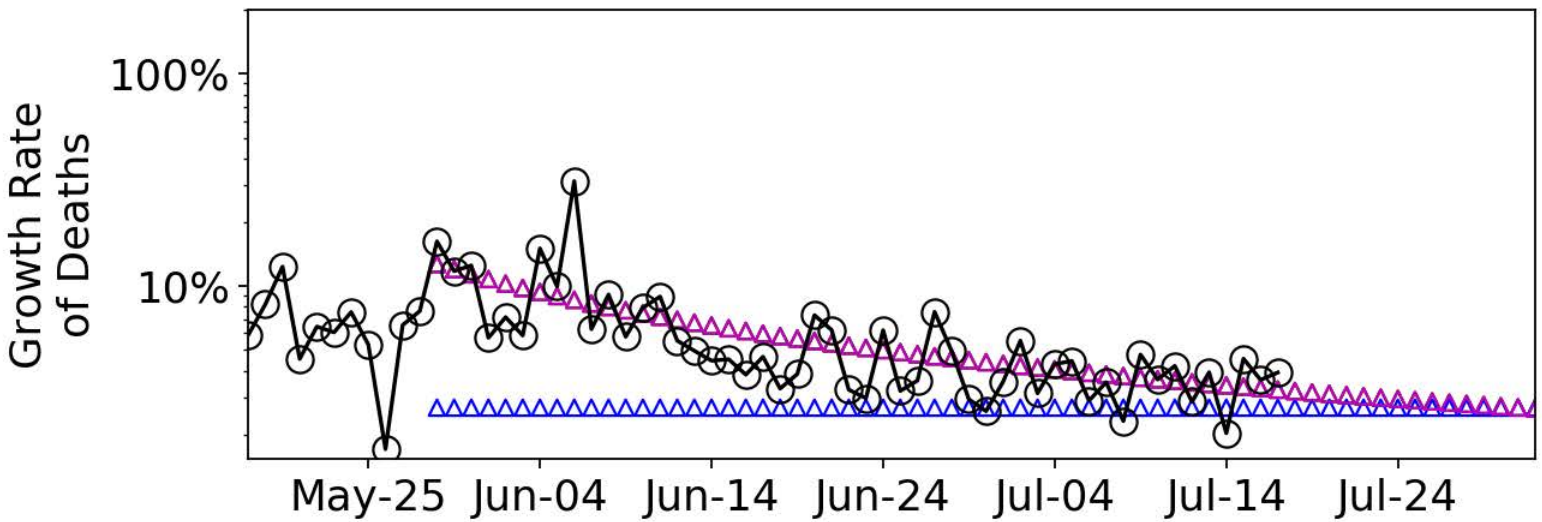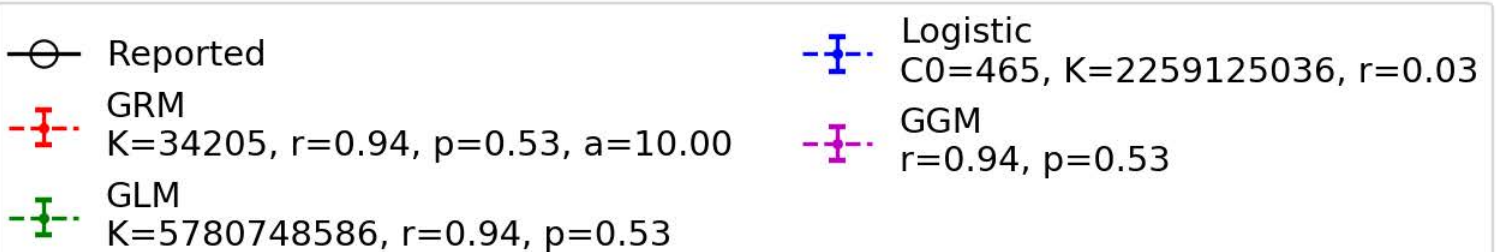



# Honduras

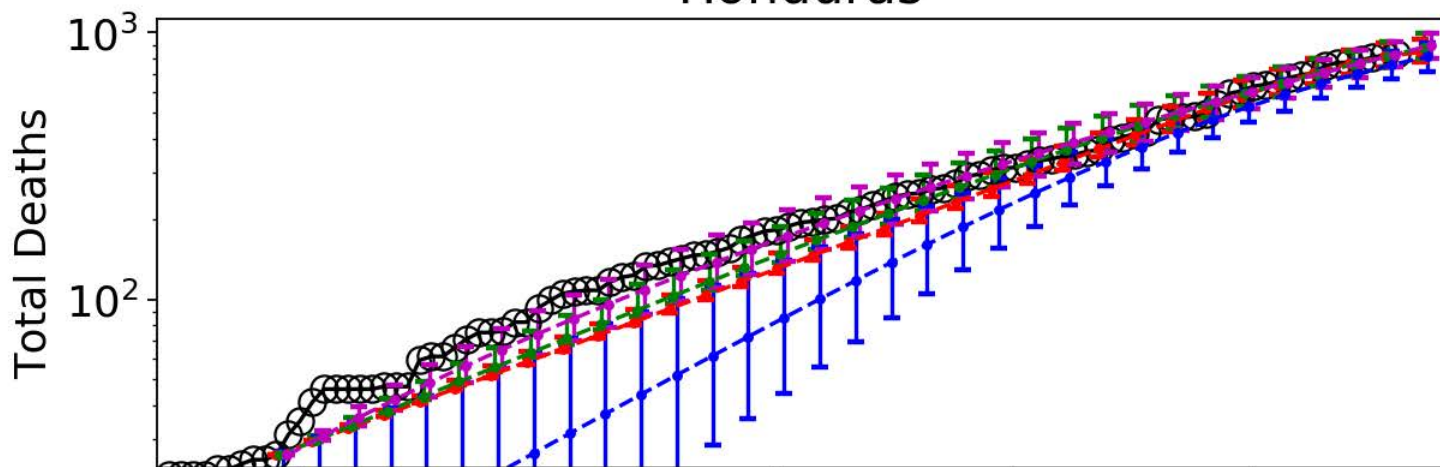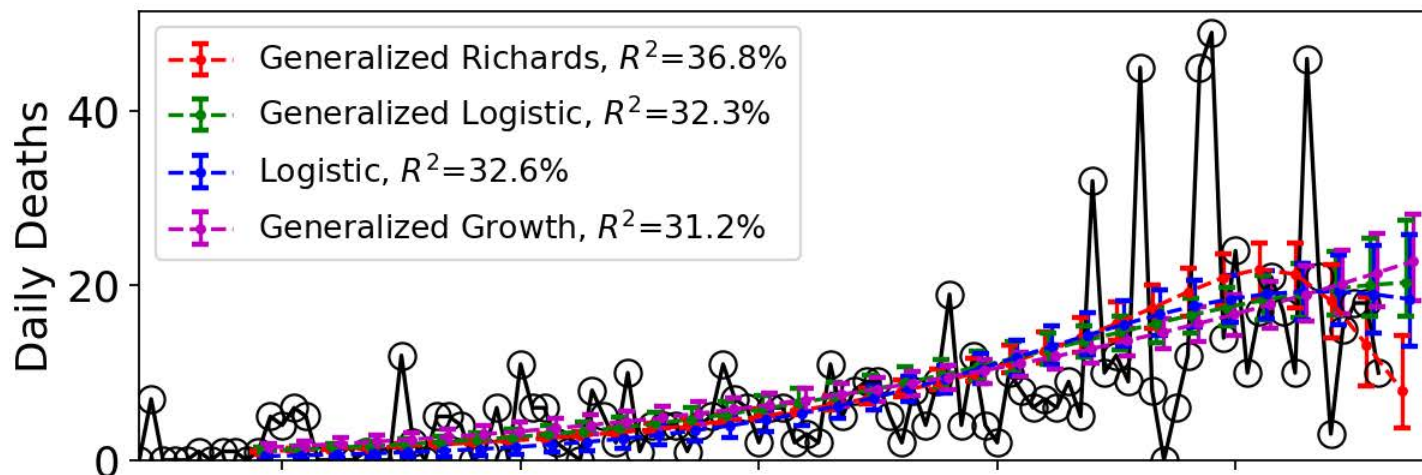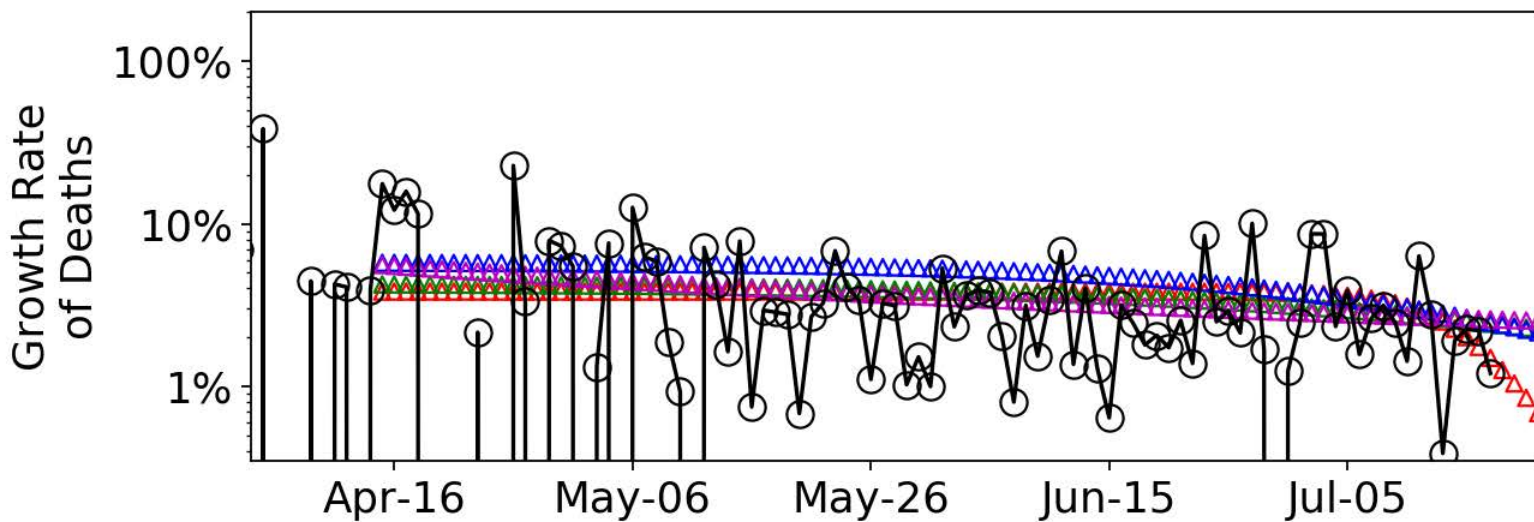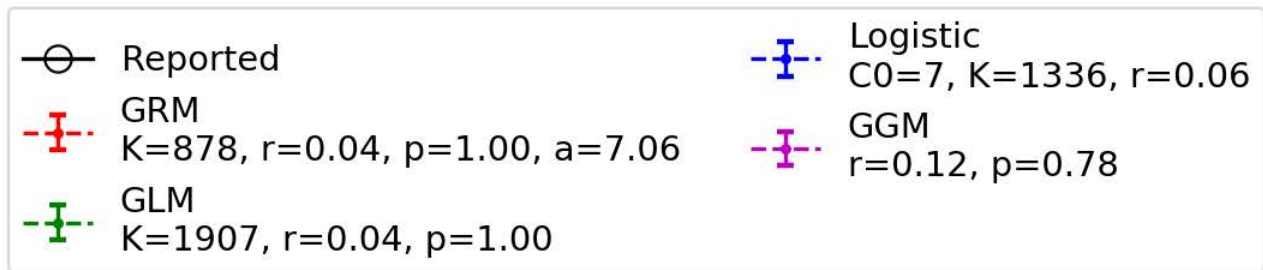

# Azerbaijan

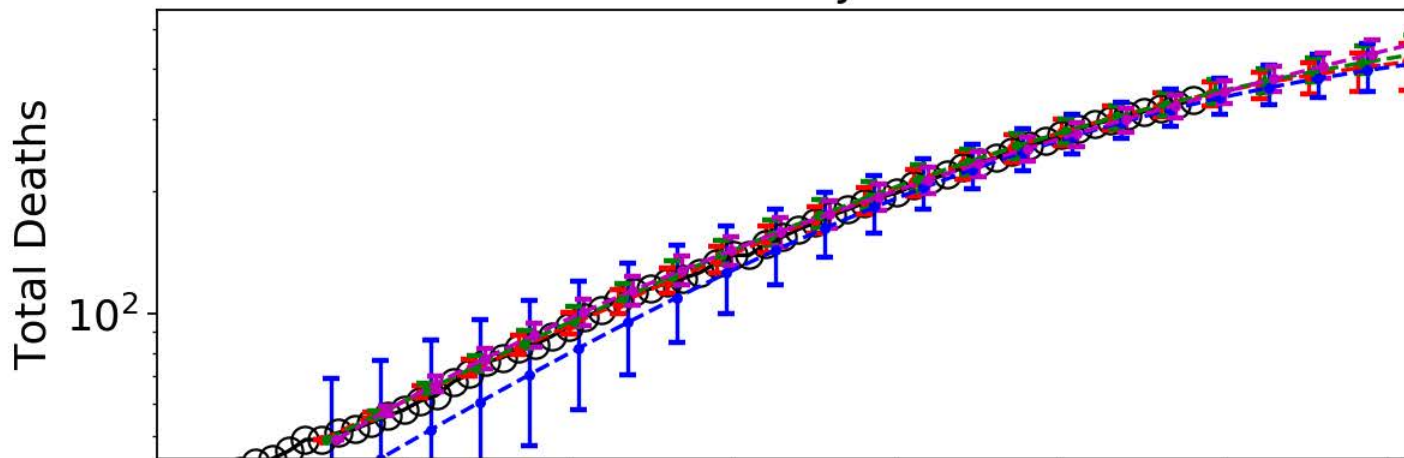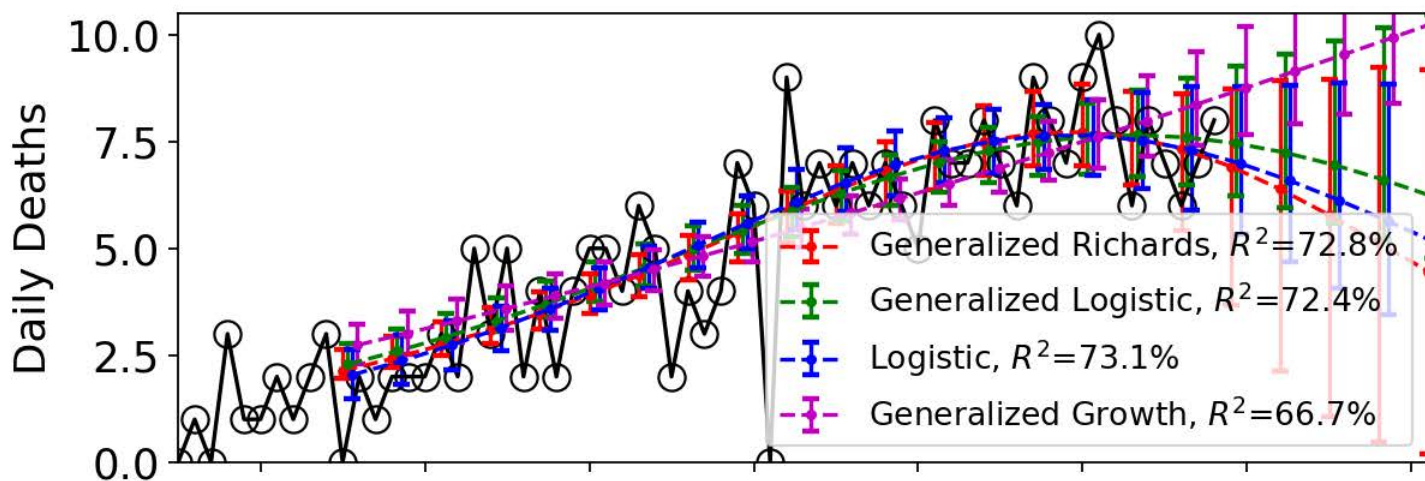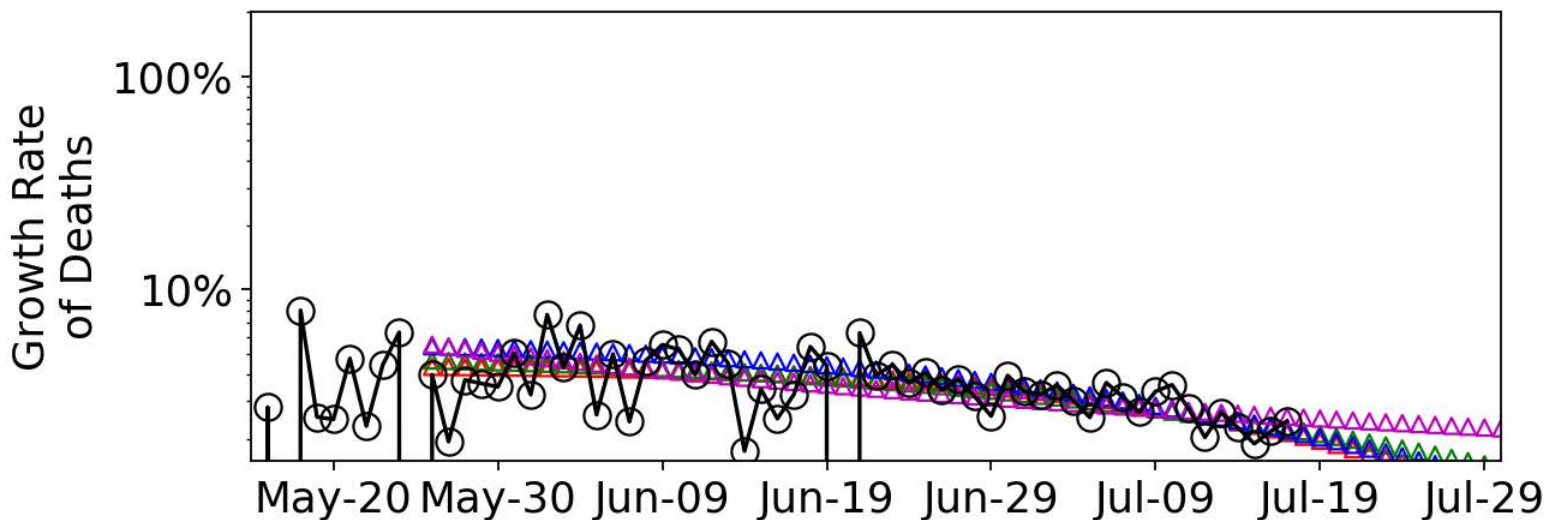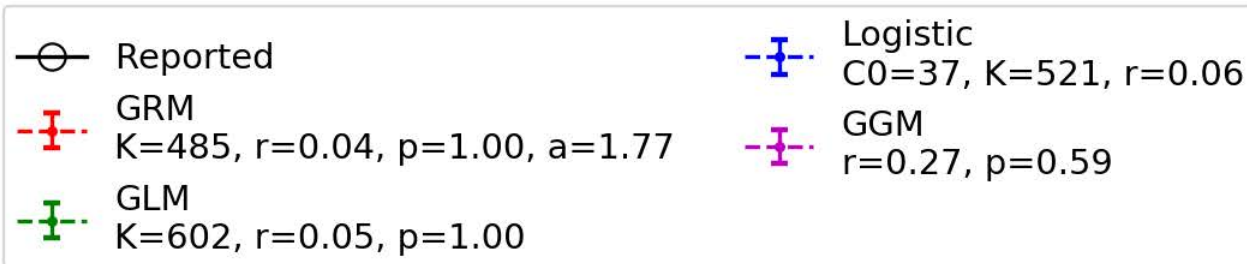

# Ireland

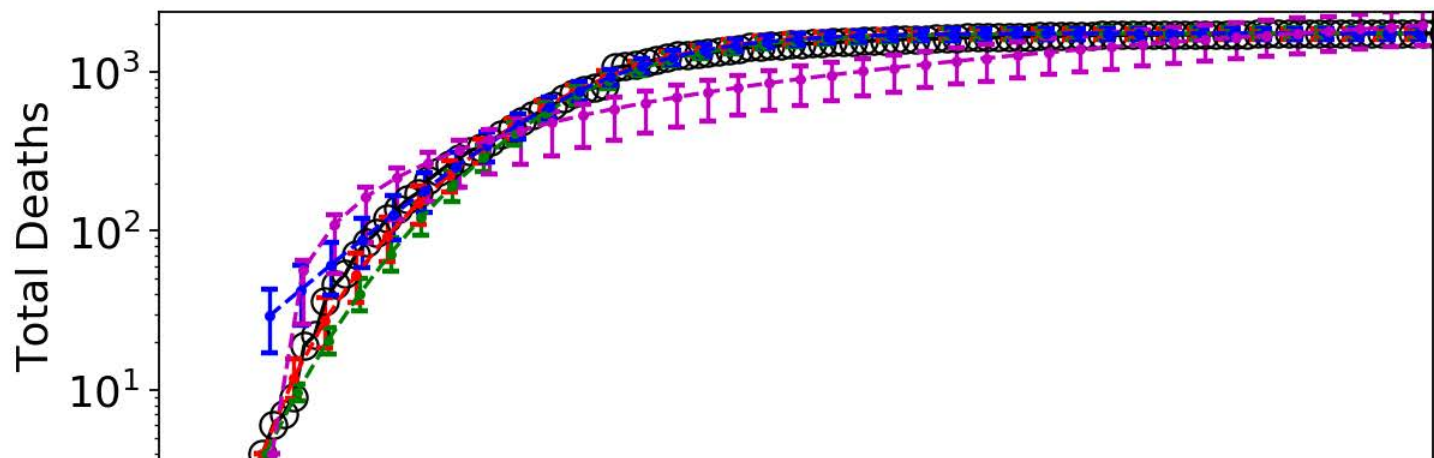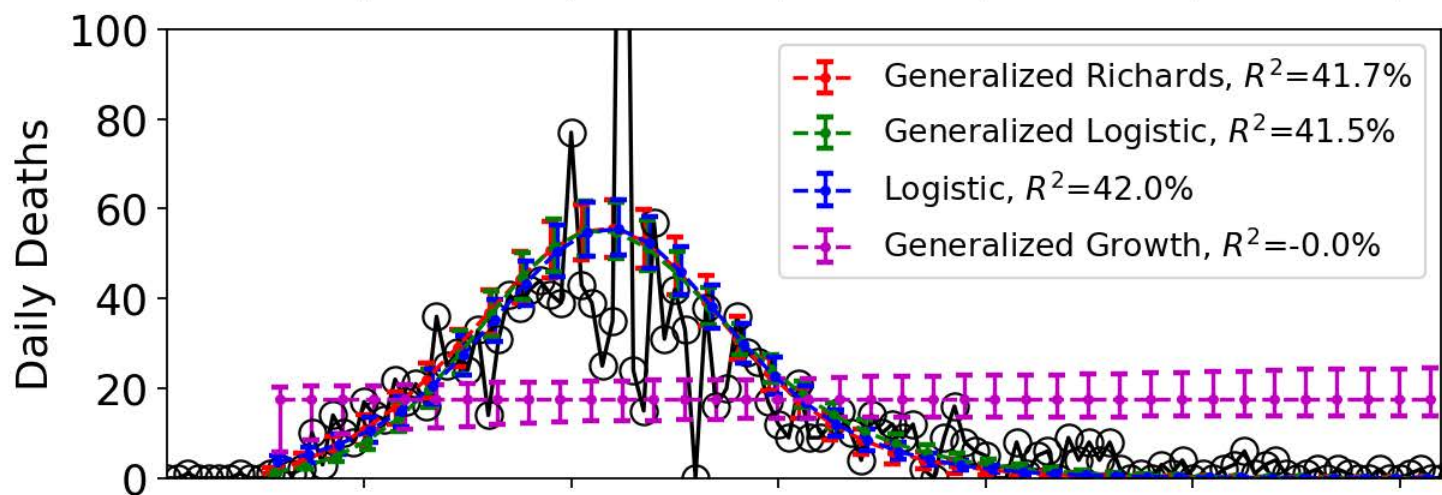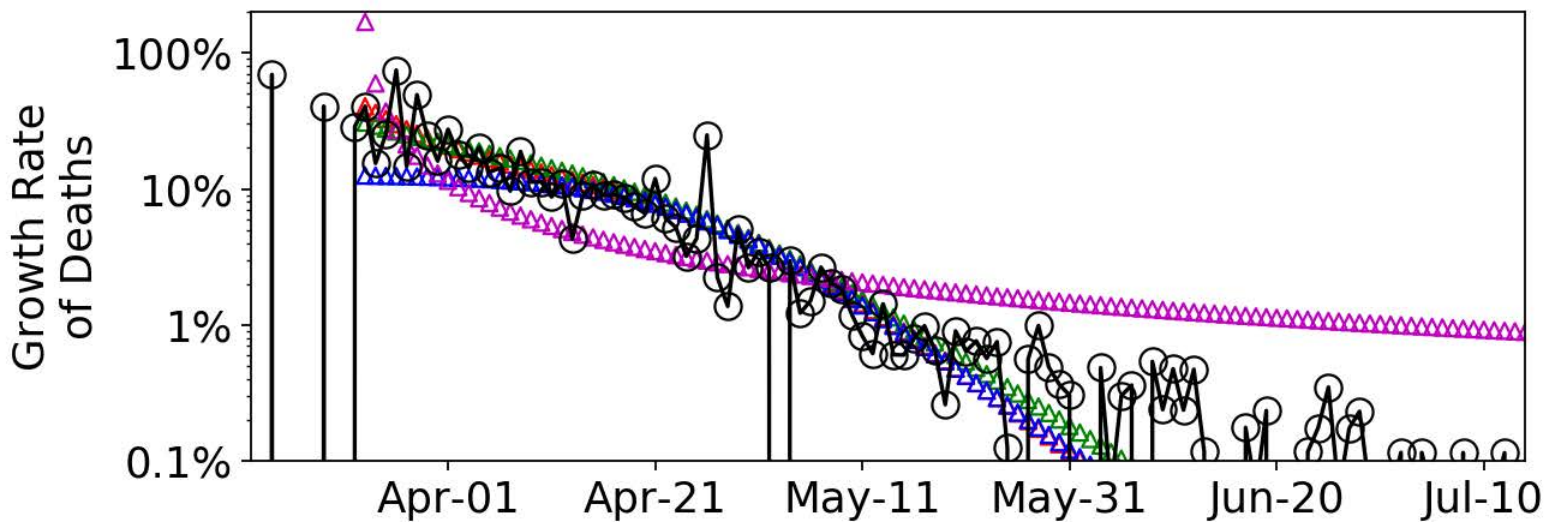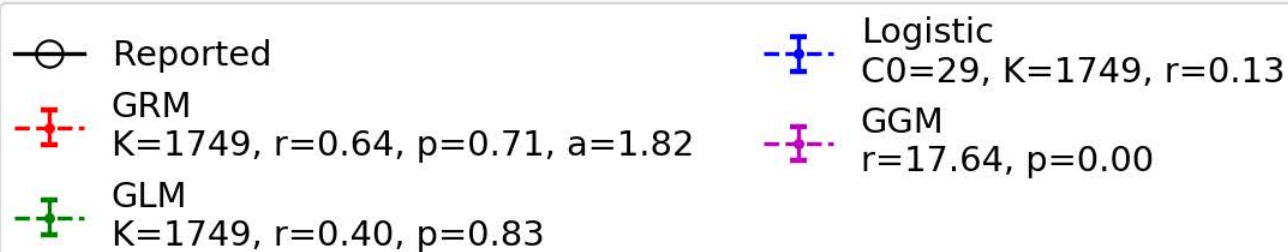



# Japan

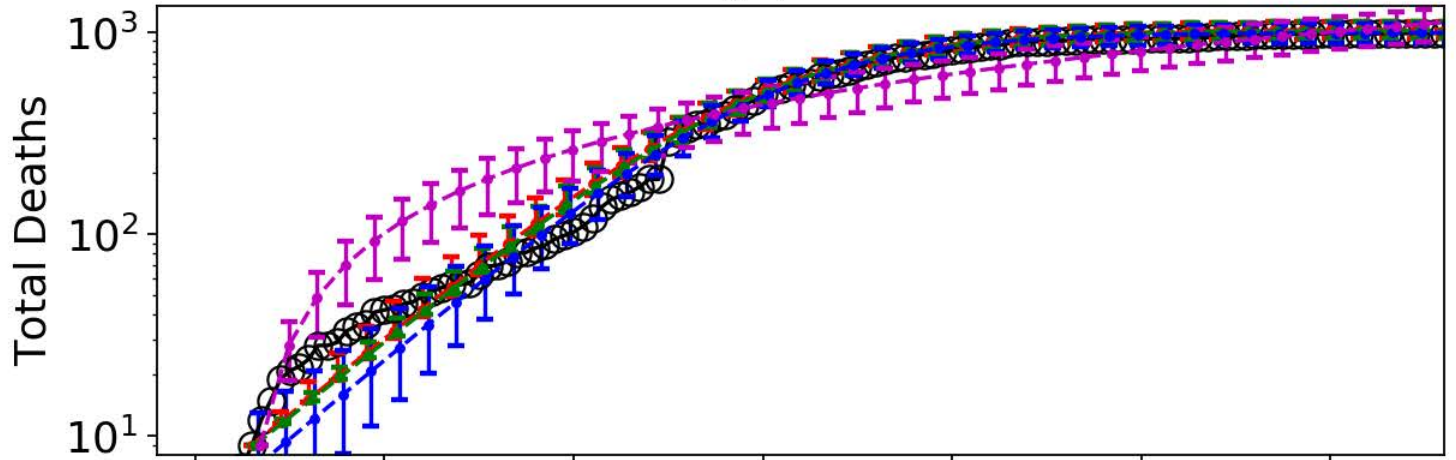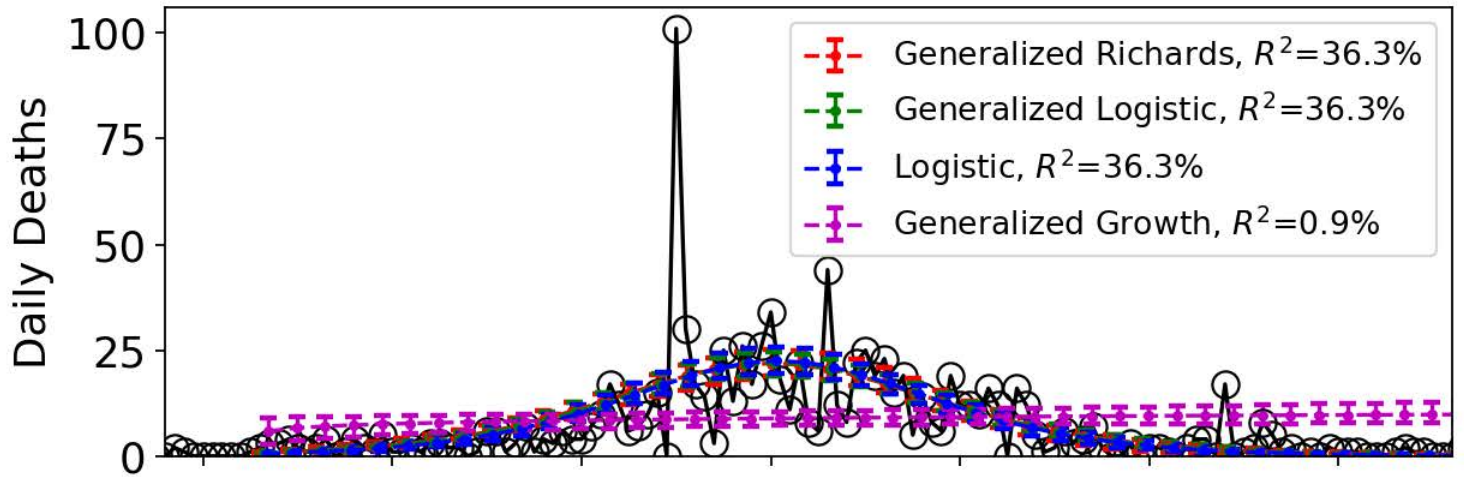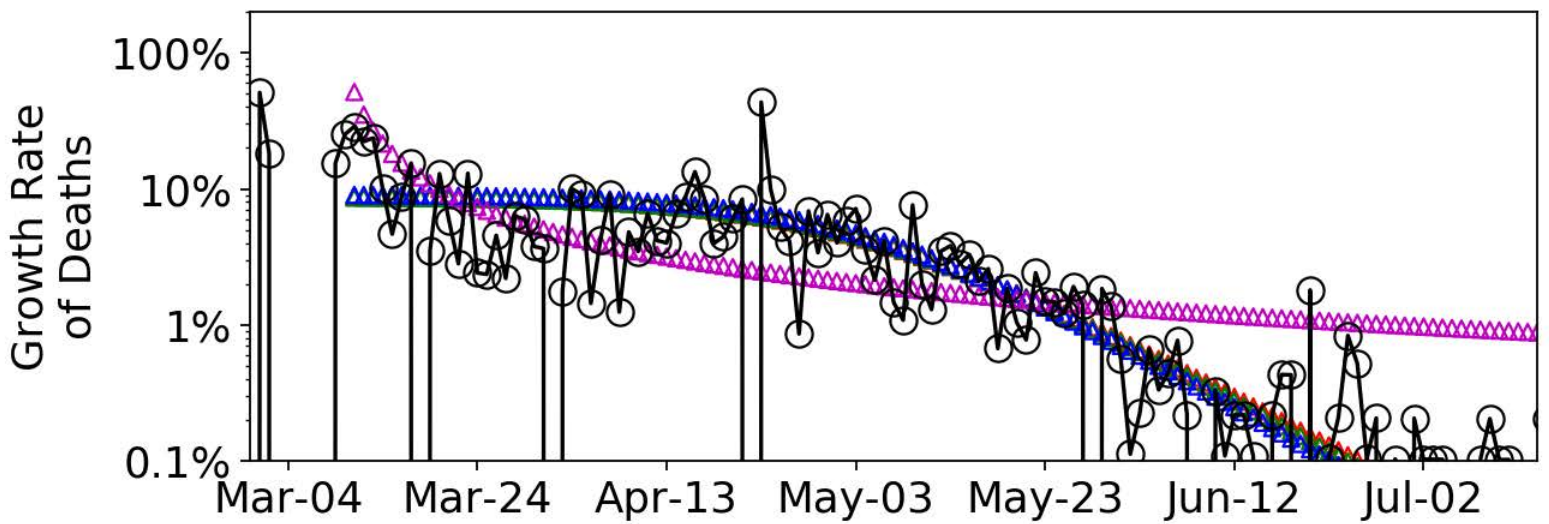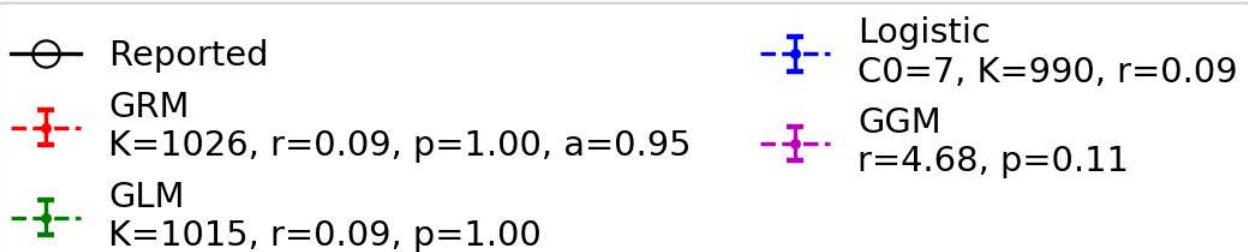

# Serbia

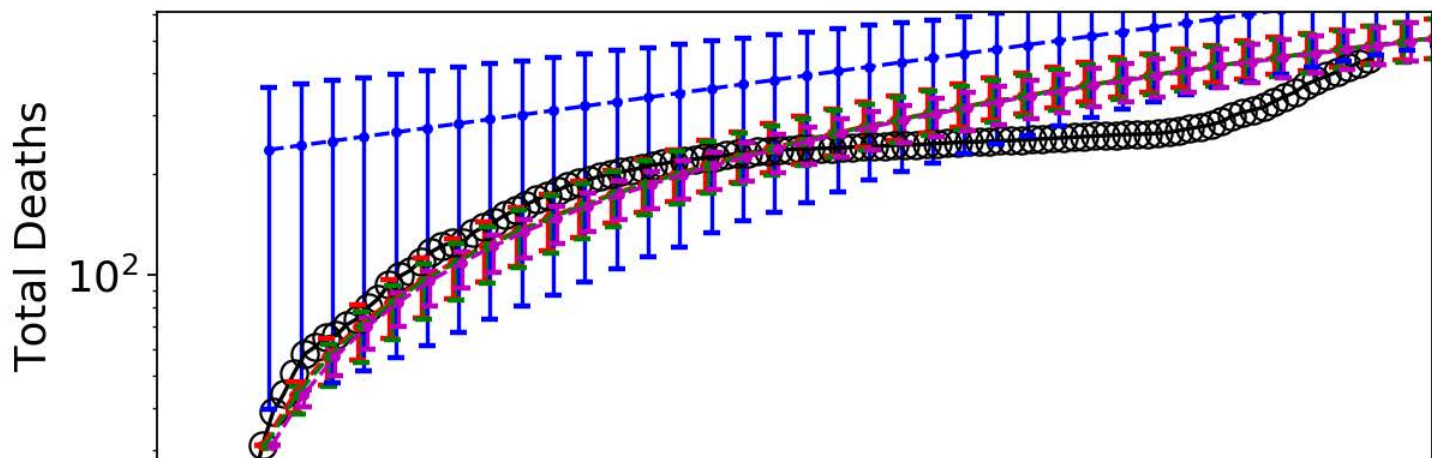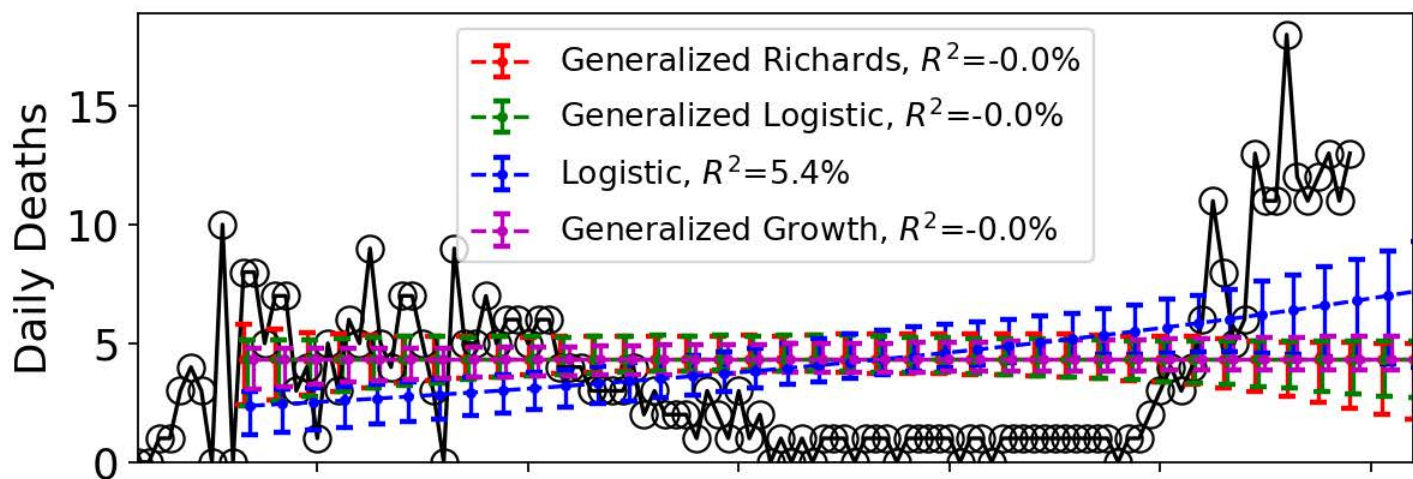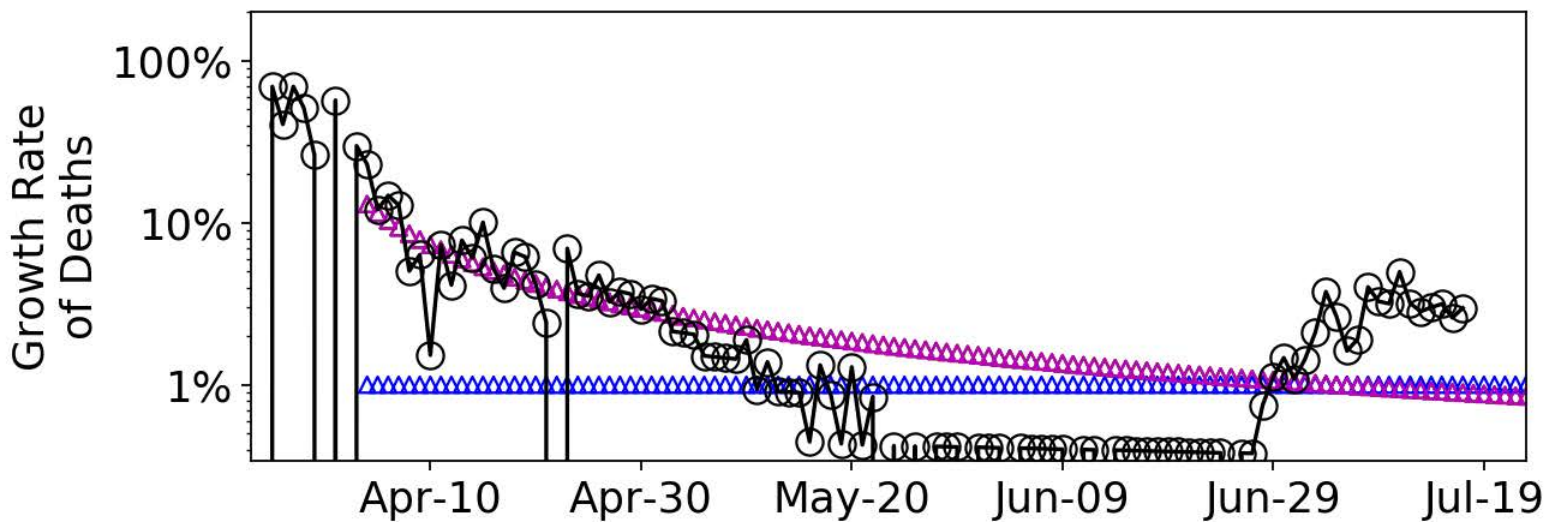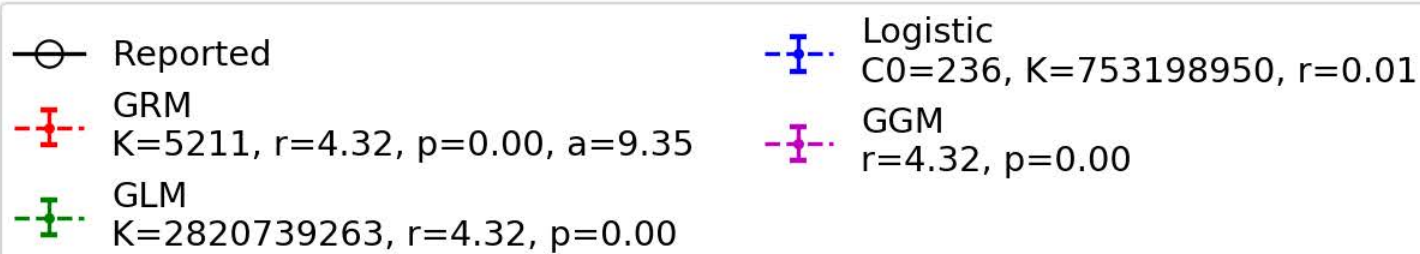



# Austria

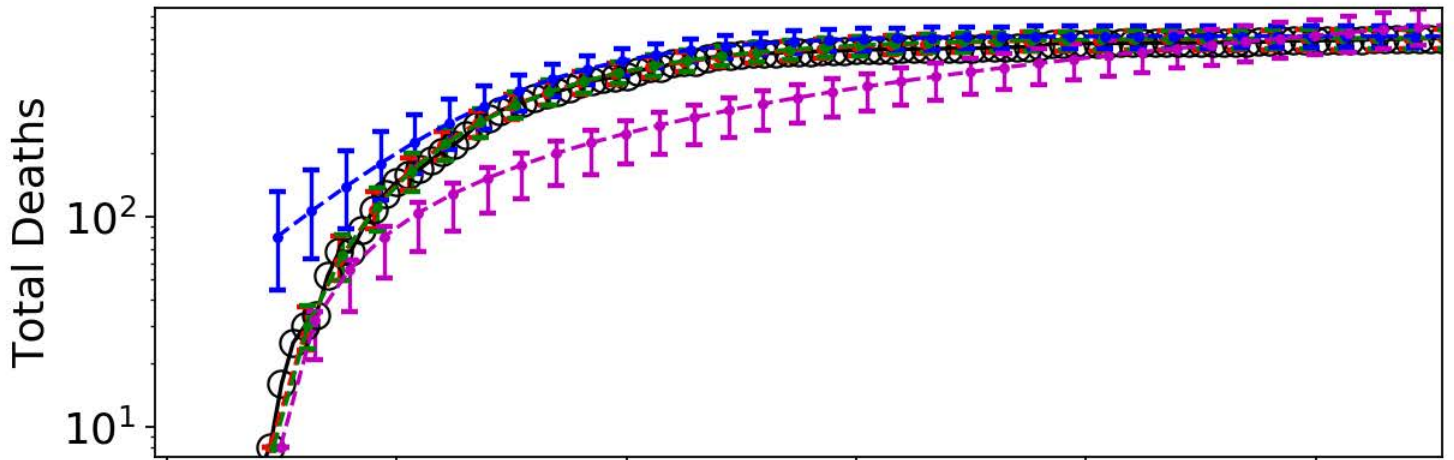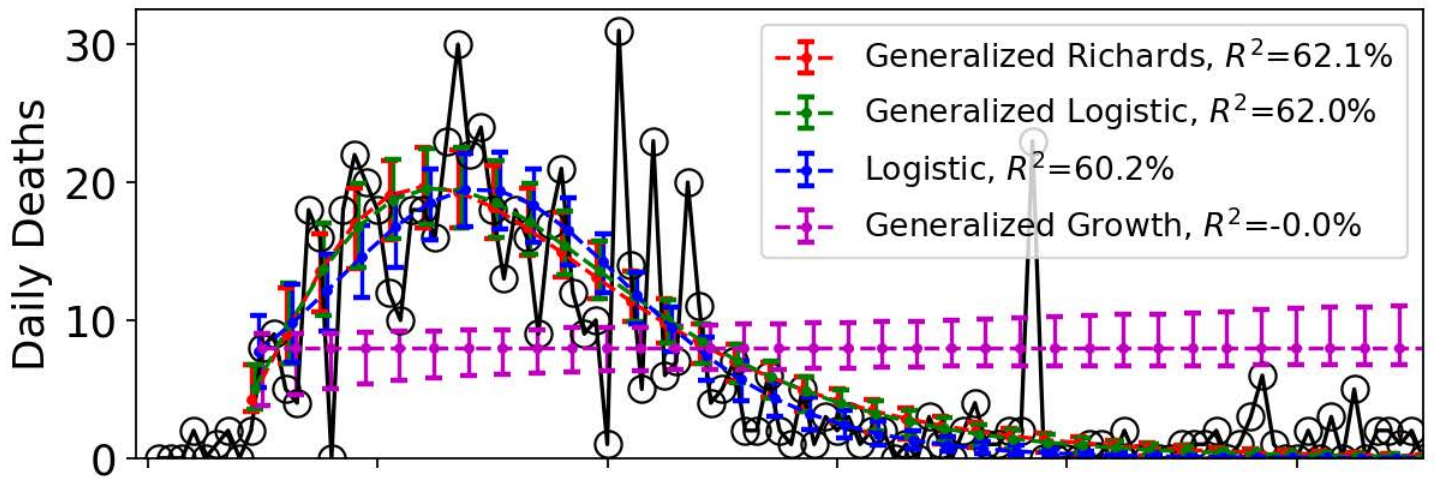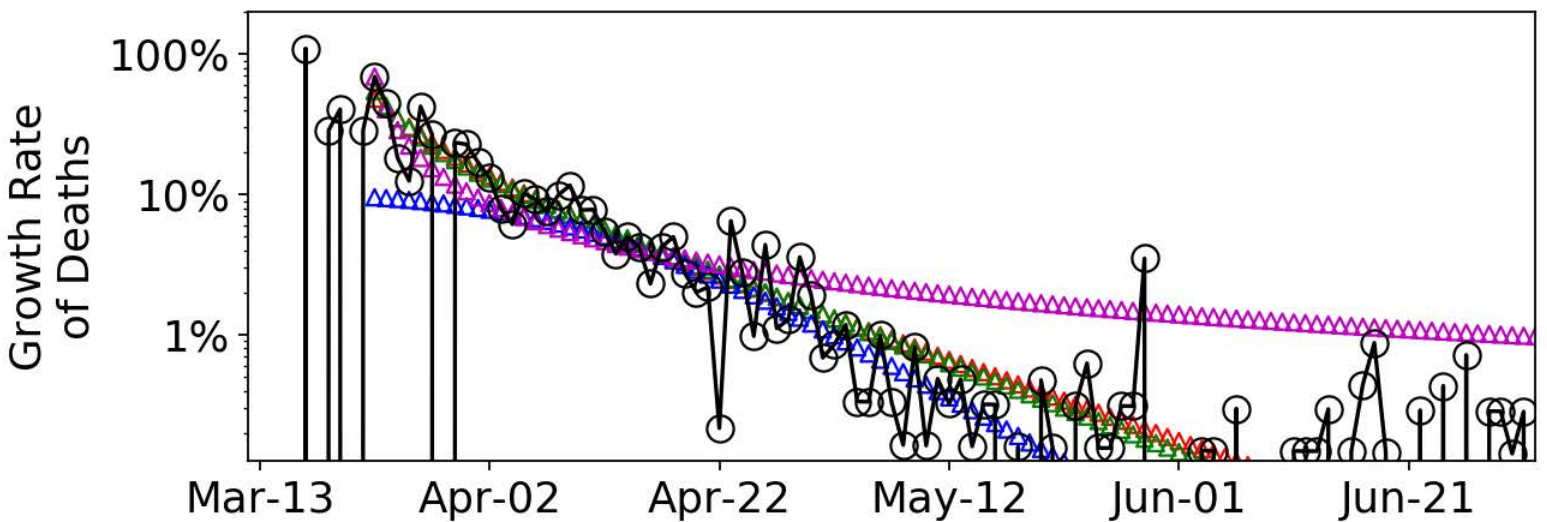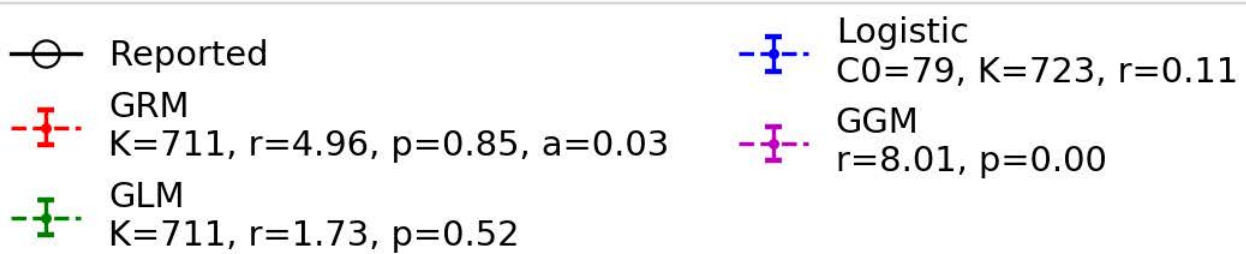

Supplement: 11071_2020_5966_MOESM2_ESM.pdf [file 11071_2020_5966_MOESM2_ESM.pdf]
